# Supplementary material for: Gene Expression in Brain and Liver Produced by Three Different Regimens of Alcohol Consumption in Mice: Comparison with Immune Activation
Source: PLoS One. 2013 Mar 29;8(3):e59870. doi: 10.1371/journal.pone.0059870 (PMC3612084; doi:10.1371/journal.pone.0059870)
Supplement: Table S1 — PFC differential expression and ethanol correlation data. (XLSX) [file pone.0059870.s002.xlsx]

## Sheet: PFC
Table S1. PFC differential expression and ethanol correlation data. Positive fold change (FC) indicates up regulation in treated group.
nuID	Probe ID	Gene Symbol	Chr.Fold.Change	Chr.P.Value	Chr.FDR	CI.Fold.Change	CI.P.Value	CI.FDR	DID.Fold.Change	DID.PValue	DID.FDR	LPS.Fold.Change	LPS.P.Value	LPS.FDR	Chr_corr_total_EtOH	Chr_corr_total_EtOH_P.value	CI_corr_total_EtOH	CI_corr_total_EtOH_P.value	DID_corr_total_EtOH	DID_corr_total_EtOH_P.value
xnx7ijE2CcOSlY55eA	ILMN_3033922	0610007C21RIK	-1.07196	0.219999	0.998485	-1.02779	0.680101	0.957087	1.01052	0.74103	0.998969	1.03484	0.0972564	0.608755	0.237387	0.509003	-0.608526	0.0619156	-0.203076	0.573643
xPkUXaq37oR_vSi6HY	ILMN_3092673	0610007C21RIK	-1.1009	0.0948153	0.998485	1.01656	0.718226	0.961735	1.00331	0.931296	0.998969	1.02338	0.362914	0.840364	0.431971	0.212524	-0.332178	0.348371	0.314552	0.376053
iklHld10_k_oHx7.X0	ILMN_2816547	0610007P08RIK	-1.01132	0.761933	0.998485	-1.00517	0.881027	0.982513	-1.03733	0.169329	0.998969	-1.03127	0.114831	0.636855	-0.596241	0.0688662	-0.207936	0.564301	0.0375783	0.923536
ZqRKnn0K14kTIep1.c	ILMN_2808939	0610007P14RIK	1.01532	0.70296	0.998485	1.00012	0.997336	0.999406	1.024	0.329947	0.998969	1.05591	0.0250212	0.448512	0.420191	0.226651	-0.607092	0.062702	0.393119	0.26108
6eu5PPSC6SyheqOhqU	ILMN_2634564	0610007P22RIK	-1.02698	0.516604	0.998485	1.01968	0.591751	0.939387	1.01205	0.783741	0.998969	1.00375	0.900898	0.989083	0.148319	0.682597	-0.26142	0.465648	-0.13926	0.701208
c30eG3GHzE0D_U4NX8	ILMN_2734484	0610009B22RIK	-1.07835	0.249345	0.998485	-1.00345	0.957878	0.994812	1.02475	0.698557	0.998969	1.00508	0.881213	0.985741	0.398048	0.25461	-0.148704	0.681809	0.140929	0.697767
Hfl_tOO3nRJfAFfAEc	ILMN_2952292	0610009D07RIK	NA	NA	NA	-1.04178	0.224045	0.883779	NA	NA	NA	-1.00196	0.911739	0.991054	NA	NA	-0.0894992	0.805781	NA	NA
odfnyvXghIeuVEvU6U	ILMN_1213681	0610009O20RIK	-1.03033	0.564724	0.998485	-1.00917	0.742629	0.967041	-1.00961	0.744445	0.998969	-1.00162	0.954943	0.99602	0.80382	0.005076	0.219781	0.541786	-0.229097	0.524335
xOG1rtd0XUBlXUVJJ0	ILMN_2674228	0610010K14RIK	-1.05975	0.315933	0.998485	-1.00699	0.859901	0.981082	-1.00813	0.809866	0.998969	1.06033	0.0160779	0.387444	0.450114	0.191783	-0.00735243	0.983917	-0.254256	0.478397
oHrkogxSqJ_wOgYQVY	ILMN_2658619	0610012G03RIK	-1.11316	0.196111	0.998485	1.01979	0.622351	0.94739	1.03054	0.540941	0.998969	-1.00101	0.978131	0.998221	0.237163	0.509415	-0.589574	0.0728431	0.117106	0.747315
igQfe5fQ3hf6p1RqV4	ILMN_2727437	0610031J06RIK	-1.01402	0.514809	0.998485	-1.02961	0.382558	0.899257	1.02803	0.174892	0.998969	1.00941	0.717687	0.956251	0.256186	0.474948	-0.593233	0.0706429	0.014737	0.969984
reSBdIJSXQXHqudUsI	ILMN_2628021	0610031J06RIK	1.00829	0.895219	0.998485	-1.10606	0.0949876	0.865421	-1.03079	0.318606	0.998969	1.04942	0.0404296	0.497026	-0.250269	0.485557	-0.317389	0.371526	0.239429	0.505256
cUtTAeAVHdSKgqS7dI	ILMN_2793281	0610031J06RIK	-1.03283	0.460565	0.998485	-1.03724	0.277371	0.891024	-1.00138	0.969088	0.998969	1.01442	0.650599	0.93788	0.118819	0.743722	-0.53788	0.108778	-0.00598784	0.986902
HvuX0xeoBe.URHP3UM	ILMN_2611352	0610037L13RIK	1.02858	0.621717	0.998485	-1.0448	0.238265	0.883779	-1.03559	0.298355	0.998969	-1.08271	0.028532	0.450407	-0.299211	0.400993	0.0276857	0.939484	-0.107024	0.768549
WA2R5J0CUZ6IG0YF9o	ILMN_2622630	0610037L13RIK	-1.045	0.356799	0.998485	1.0163	0.761234	0.969424	-1.01578	0.610491	0.998969	1.0612	0.0248997	0.448512	0.635658	0.0482377	-0.551117	0.0986946	0.35123	0.319656
ZlaE1Ud_NUqlPe.g7M	ILMN_2915716	0610040J01RIK	-1.02008	0.405817	0.998485	NA	NA	NA	NA	NA	NA	-1.01772	0.337981	0.828649	-0.235302	0.512842	NA	NA	NA	NA
BF957X56L6n7nRxdfU	ILMN_2621882	0910001L09RIK	-1.11798	0.250044	0.998485	1.0229	0.649302	0.951617	1.00777	0.818548	0.998969	-1.0057	0.838296	0.981285	0.32388	0.36127	-0.400186	0.251831	-0.231895	0.51914
E6KgqeoluOSItdI718	ILMN_2958076	1110001J03RIK	-1.25855	0.0391781	0.998485	1.00799	0.888941	0.984229	-1.02318	0.700144	0.998969	1.03059	0.494364	0.89692	0.418194	0.229098	-0.394325	0.25949	0.125974	0.728765
WhXsxnQi8P477BKb7g	ILMN_2634338	1110002B05RIK	-1.03004	0.588868	0.998485	1.02338	0.72752	0.964221	-1.00078	0.991201	0.999126	1.00977	0.742735	0.95988	-0.479745	0.160566	0.229259	0.524034	0.0108221	0.976329
BJL13eLe54KJpdq730	ILMN_2938179	1110002N22RIK	-1.02607	0.37581	0.998485	1.04727	0.102868	0.865421	1.00495	0.844545	0.998969	-1.00048	0.982169	0.998221	0.0808037	0.824392	-0.0143501	0.968616	-0.0853008	0.814756
rXRBdSen86cgxoCYHo	ILMN_1225158	1110003E01RIK	-1.00447	0.937734	0.998485	1.02284	0.368059	0.899257	1.0316	0.216227	0.998969	-1.00111	0.964873	0.997417	-0.0390155	0.914783	-0.0541376	0.88192	-0.646189	0.043525
BHFxA2GKCDOqkbqJ0U	ILMN_2919489	1110008F13RIK	-1.06228	0.208803	0.998485	1.02391	0.49716	0.919326	-1.03008	0.551964	0.998969	1.0327	0.387995	0.852644	0.669574	0.034186	-0.37593	0.318716	0.16215	0.654477
xAZdRquUa4o6lM_1y0	ILMN_2646001	1110008J03RIK	-1.05237	0.185662	0.998485	1.00714	0.741022	0.96656	1.03884	0.160059	0.998969	1.01224	0.626118	0.933192	0.701148	0.0238749	0.319639	0.367955	0.587505	0.0741069
Wk.bOIevpih6BkUb_Q	ILMN_2642876	1110008J03RIK	1.00274	0.939838	0.998485	-1.02993	0.268547	0.887879	1.01602	0.522393	0.998969	-1.02709	0.350788	0.833567	0.271004	0.448833	-0.200793	0.578049	-0.0685723	0.850702
HpiqXtdUJYJdfoLiPc	ILMN_2803878	1110008J03RIK	-1.01404	0.535512	0.998485	-1.00051	0.982318	0.997599	1.01185	0.558992	0.998969	-1.0108	0.581837	0.918689	0.277888	0.436926	0.197137	0.585134	-0.558955	0.0930151
xTdqx6XUjXLq3FJehQ	ILMN_1225594	1110008P14RIK	-1.00005	0.999574	0.999822	1.05532	0.584175	0.938971	1.10039	0.0978471	0.998969	-1.05533	0.183386	0.71364	0.39293	0.261331	-0.305589	0.390529	0.406334	0.243934
0Jx4U9wd1dd4914UI0	ILMN_1221251	1110012D08RIK	-1.04863	0.199811	0.998485	-1.03247	0.249537	0.883779	-1.04175	0.113104	0.998969	1.02924	0.287377	0.794814	-0.611971	0.0600525	-0.106869	0.784349	0.112746	0.772735
Te9b3r6v3U74vaLvcI	ILMN_1257630	1110012J17RIK	1.13494	0.0592231	0.998485	1.05654	0.456124	0.913041	1.07013	0.100868	0.998969	-1.0456	0.23064	0.755297	-0.141435	0.696727	-0.2663	0.457051	0.0118666	0.975828
xuwHot5ZuMLhAniKVE	ILMN_2604806	1110012L19RIK	-1.04372	0.274274	0.998485	-1.01684	0.725488	0.963155	1.01067	0.478175	0.998969	1.02987	0.206283	0.733731	0.587573	0.0740655	-0.216931	0.547171	-0.206545	0.593904
ZUrITVIkfjVHogIOHk	ILMN_3144761	1110012L19RIK	-1.03639	0.309386	0.998485	-1.01405	0.612799	0.945847	-1.00345	0.873846	0.998969	1.01185	0.517815	0.901243	0.336727	0.3414	-0.481848	0.158476	0.361678	0.304454
lrr1SIBBzstTXi.u3g	ILMN_2617920	1110017D15RIK	-1.02435	0.627842	0.998485	1.0434	0.405475	0.905432	-1.03424	0.267596	0.998969	1.03737	0.123006	0.649071	-0.0648167	0.858808	-0.249001	0.487844	-0.114959	0.751824
KrRaUoOQ7nvEHVWU08	ILMN_3118081	1110017D15RIK	-1.04032	0.32434	0.998485	1.01057	0.819368	0.977309	-1.02372	0.358749	0.998969	1.01713	0.420641	0.868972	0.192268	0.594619	-0.333299	0.346646	-0.356169	0.312422
Q6iFJ5XXp.6f.rtfgo	ILMN_2661005	1110018G07RIK	1.07888	0.129236	0.998485	1.23672	0.0471798	0.865421	1.0323	0.296427	0.998969	-1.00278	0.923904	0.991652	-0.805556	0.0049097	-0.133464	0.713193	-0.392653	0.261697
ixTte0iCkdcpauiru8	ILMN_2960474	1110031I02RIK	-1.04718	0.321747	0.998485	-1.01632	0.719076	0.961735	-1.02787	0.24918	0.998969	1.01262	0.499918	0.899508	-0.329827	0.352002	-0.603847	0.0645056	0.713654	0.0204628
QXnqfQoCoAotIgp7Xc	ILMN_2972929	1110034A24RIK	1.01109	0.646406	0.998485	1.03257	0.116725	0.865421	-1.02723	0.170179	0.998969	1.01134	0.498147	0.898611	0.46952	0.170966	-0.391496	0.263231	-0.0700074	0.847607
ER0h90nXuTVLsp3ilE	ILMN_3000080	1110038D17RIK	1.04075	0.303338	0.998485	1.01845	0.465043	0.914237	-1.05497	0.107984	0.998969	1.02846	0.267408	0.777817	-0.742543	0.0138969	-0.153379	0.672265	0.30582	0.390152
6nnjjCge6oL7oRLqdE	ILMN_2863437	1110038F14RIK	-1.04558	0.491819	0.998485	-1.01166	0.760191	0.969424	1.02802	0.276185	0.998969	1.0077	0.826211	0.977831	0.609807	0.0612183	-0.474783	0.165564	0.229497	0.523591
EAFV_VaCISeOZ1_.qg	ILMN_2629375	1110038F14RIK	-1.02643	0.614073	0.998485	1.06281	0.0314535	0.865421	1.01358	0.606398	0.998969	1.00133	0.944554	0.994648	0.481603	0.158718	-0.491301	0.149281	0.304244	0.392726
rf6UJEsrjXjLSSRI9U	ILMN_2664522	1110048D14RIK	1.02779	0.379636	0.998485	1.01563	0.463788	0.914237	1.01029	0.644318	0.998969	1.00349	0.89564	0.987735	0.0179309	0.960789	0.00818217	0.982103	-0.424763	0.221106
Not14xOHn6oK3xEtyU	ILMN_1255697	1110049F12RIK	1.01463	0.714861	0.998485	-1.027	0.551618	0.931317	-1.05485	0.22649	0.998969	1.01029	0.704556	0.95358	0.124112	0.732648	-0.3842	0.273018	0.249747	0.486499
0okjGGCN.zPpeaoi6E	ILMN_1221838	1110049F12RIK	-1.00633	0.863646	0.998485	-1.00887	0.807735	0.976172	-1.00499	0.825534	0.998969	1.05337	0.0640674	0.559193	0.408398	0.241315	0.13805	0.703705	-0.173981	0.654388
urR66g0OTCBC16QtIU	ILMN_2756686	1110057K04RIK	1.04769	0.253167	0.998485	-1.01716	0.606798	0.944217	1.06745	0.0500082	0.998969	1.02649	0.268185	0.777817	-0.428872	0.216189	-0.108959	0.764462	-0.0809429	0.824093
0hBGK11eu3kQo5deSI	ILMN_2967362	1110057K04RIK	1.06092	0.102112	0.998485	-1.00165	0.960876	0.994812	1.00405	0.915097	0.998969	1.00351	0.875856	0.985484	0.223256	0.535251	0.121603	0.737891	-0.431535	0.213037
fUdT.7lL9jF53OcUnE	ILMN_2633457	1110057K04RIK	-1.00075	0.987109	0.998485	-1.02302	0.529314	0.928216	1.00118	0.971998	0.998969	1.01821	0.483855	0.895615	0.0894279	0.805933	-0.176497	0.625716	-0.675244	0.0321462
0aJcRjOiHqBoKhnk_E	ILMN_2679428	1110058L19RIK	-1.10913	0.157334	0.998485	-1.01588	0.674181	0.956755	-1.01514	0.525319	0.998969	-1.00447	0.866852	0.984632	0.543233	0.104626	0.0410026	0.910457	0.645003	0.0440396
KVyJRIMulK4zjqf9RE	ILMN_2846731	1110059E24RIK	-1.00616	0.916022	0.998485	-1.03671	0.408753	0.905432	-1.00666	0.812003	0.998969	1.01651	0.647082	0.937589	-0.267897	0.454254	-0.303923	0.393249	0.0255041	0.944246
TKfWhL.EJEKS6p7u3k	ILMN_2825260	1110059G10RIK	1.00187	0.936511	0.998485	NA	NA	NA	1.00379	0.819655	0.998969	NA	NA	NA	-0.590066	0.0725447	NA	NA	-0.137756	0.723767
ucU7wSOH3H16kNUg_0	ILMN_1222356	1110067D22RIK	1.00336	0.950695	0.998485	1.04761	0.301478	0.891024	-1.02724	0.518617	0.998969	1.02099	0.609871	0.929414	-0.279613	0.433966	0.223135	0.535478	-0.0469901	0.897436
TJT6lTd6kvaIuCdH_8	ILMN_2593774	1190002H23RIK	-1.03322	0.577359	0.998485	1.12747	0.0202557	0.865421	-1.02809	0.377757	0.998969	1.00791	0.833326	0.980115	0.381543	0.27663	-0.466688	0.173917	-0.417699	0.229707
fT1uc5rEx8B7ypKHVI	ILMN_3162133	1190002N15RIK	1.00963	0.714827	0.998485	-1.01973	0.575931	0.936104	-1.00385	0.850721	0.998969	-1.00252	0.923188	0.991652	0.124877	0.748886	0.536944	0.109514	0.133722	0.712658
WVOtcRRcWqi8C47vF4	ILMN_2734924	1190003J15RIK	-1.02563	0.465415	0.998485	-1.01597	0.576629	0.936451	1.03437	0.165288	0.998969	-1.0093	0.642182	0.936381	0.435552	0.208332	-0.464287	0.176441	-0.118556	0.744274
6FhKviO1uLhAmgmLp4	ILMN_2963792	1190005F20RIK	1.01667	0.675536	0.998485	1.08429	0.0313564	0.865421	1.00809	0.813102	0.998969	1.06473	0.0118733	0.360287	-0.316938	0.372242	0.276415	0.439462	-0.184999	0.633706
oNbpd4tZFBUhVp_uCI	ILMN_2699367	1190005I06RIK	-1.03767	0.385776	0.998485	-1.03213	0.176369	0.875762	1.01775	0.406125	0.998969	-1.02412	0.269623	0.777817	0.381595	0.276559	-0.0622144	0.873666	-0.244372	0.496232
TeqMlOCuerould96NM	ILMN_2893564	1190007F08RIK	-1.06302	0.321392	0.998485	-1.12213	0.209324	0.880091	-1.0042	0.884941	0.998969	1.005	0.768209	0.964968	0.141503	0.696586	-0.643236	0.0448136	0.195764	0.587803
fXbZKkip4JRPOdB84o	ILMN_3105117	1200011M11RIK	1.02888	0.21034	0.998485	NA	NA	NA	NA	NA	NA	NA	NA	NA	-0.0731023	0.840941	NA	NA	NA	NA
xp6yXrsCFC9Lnsofco	ILMN_2623480	1200014J11RIK	-1.01666	0.745602	0.998485	-1.00113	0.957511	0.994812	-1.01052	0.71926	0.998969	1.0152	0.570199	0.914671	-0.171258	0.636168	0.239382	0.535026	-0.287999	0.419707
HpjtP17m.UsoCJV3jk	ILMN_1236716	1200016B10RIK	1.00969	0.764629	0.998485	1.00405	0.885654	0.983328	-1.11941	0.000293303	0.998969	1.08104	0.00300398	0.236779	0.237382	0.509011	-0.270775	0.449232	-0.411705	0.237151
EVQh8IThTlFE9ROp58	ILMN_2798079	1200016B10RIK	-1.01031	0.696064	0.998485	1.00583	0.782188	0.972711	-1.0494	0.0902126	0.998969	1.01233	0.508729	0.900776	0.145616	0.688134	0.341676	0.333897	0.458281	0.18285
o3VT8BeJ5cORL6sKro	ILMN_1217040	1300001I01RIK	1.03891	0.350624	0.998485	-1.04196	0.167501	0.869529	-1.03554	0.127073	0.998969	-1.00205	0.947489	0.995647	0.502736	0.138602	0.253003	0.480641	-0.0712646	0.855434
QdHlh8qBPXfrROleHU	ILMN_1219591	1300014I06RIK	1.03564	0.112759	0.998485	NA	NA	NA	NA	NA	NA	1.01234	0.513568	0.900776	0.0525315	0.885404	NA	NA	NA	NA
3LdpyBJ4lXeF5JkIEg	ILMN_2687854	1300018J18RIK	1.04665	0.146027	0.998485	-1.01354	0.633126	0.949555	1.00963	0.699877	0.998969	-1.0164	0.531737	0.904543	-0.145968	0.687411	-0.241954	0.500637	0.144011	0.691429
WKZ647rmfEbsf_tNeo	ILMN_2737374	1500001L15RIK	-1.05457	0.265562	0.998485	-1.00075	0.989176	0.998798	1.0464	0.12069	0.998969	1.05354	0.0460943	0.509611	0.322517	0.363412	-0.496091	0.144749	-0.246998	0.491466
ZeVIFcSSQNDRNOhXXo	ILMN_1258543	1500001M20RIK	-1.01694	0.619799	0.998485	-1.00475	0.848119	0.979922	1.04825	0.0213198	0.998969	-1.0295	0.226669	0.751436	0.606682	0.0629282	-0.274764	0.442312	0.406442	0.243797
oKujiAJteH4eO_7xuw	ILMN_2523256	1500001M20RIK	-1.05862	0.24169	0.998485	-1.00175	0.958911	0.994812	-1.02585	0.371893	0.998969	-1.06612	0.0223968	0.435375	-0.109277	0.763791	-0.103701	0.775578	0.583277	0.0767336
u0hfUk0pIkcCl.8ees	ILMN_2984793	1500001M20RIK	-1.00512	0.89623	0.998485	-1.02447	0.533838	0.928637	1.0101	0.701845	0.998969	-1.00569	0.802715	0.973516	0.332909	0.347246	-0.108141	0.766188	0.357588	0.310358
u0DqqedEq4cIjVFWJc	ILMN_1228208	1500002O20RIK	1.02149	0.36153	0.998485	1.00194	0.933656	0.993583	NA	NA	NA	NA	NA	NA	0.180257	0.618253	-0.54729	0.101546	NA	NA
QGuOq3al1G8_ahgidg	ILMN_1250000	1500003O03RIK	1.07632	0.0348221	0.998485	-1.00768	0.775254	0.972372	1.00542	0.83671	0.998969	1.02933	0.400299	0.858326	-0.229355	0.523855	-0.412419	0.236256	-0.275448	0.44113
Kn2344R5cK6VSL9ShU	ILMN_3127704	1500010J02RIK	1.06367	0.0753322	0.998485	-1.03558	0.317297	0.89498	1.03955	0.101642	0.998969	-1.00239	0.927804	0.991937	-0.478956	0.161355	-0.127389	0.725814	0.346331	0.326918
caIX5V84_Ps_4ylf6k	ILMN_2766279	1500010J02RIK	1.0149	0.794717	0.998485	-1.02736	0.436442	0.913041	-1.00418	0.865536	0.998969	-1.01616	0.561822	0.913298	-0.536385	0.109956	-0.425421	0.220315	0.00305786	0.993311
HURQnSU0nBNROeLkSo	ILMN_2973024	1500011H22RIK	-1.05015	0.446577	0.998485	1.02205	0.535959	0.929729	-1.02141	0.427375	0.998969	1.07387	0.0105516	0.360287	0.285772	0.423472	0.117734	0.745997	-0.211166	0.558126
6AWp.g6JuB14piT6Vg	ILMN_2939012	1500012F01RIK	-1.20399	0.125882	0.998485	-1.07943	0.301225	0.891024	1.00227	0.951764	0.998969	1.00879	0.736288	0.959275	0.432832	0.211511	-0.219476	0.542361	0.0508857	0.888975
u64ccUm0844I5pT61U	ILMN_1249000	1500015O10RIK	-1.07527	0.25601	0.998485	-1.14502	0.275795	0.891024	-1.04031	0.133919	0.998969	1.04931	0.0613532	0.554622	-0.0844814	0.81651	-0.361493	0.304718	0.113127	0.771983
3VIlH15gKev7EukLXU	ILMN_2982736	1500031L02RIK	1.05626	0.176805	0.998485	1.08357	0.0878254	0.865421	1.00167	0.966236	0.998969	-1.01432	0.5163	0.900776	-0.394806	0.258857	-0.488028	0.152427	-0.282554	0.428941
iK0tNtHZJplP_VCWuA	ILMN_2648580	1500032L24RIK	-1.13567	0.253517	0.998485	-1.03485	0.499085	0.919326	-1.04405	0.411321	0.998969	1.04298	0.176295	0.708759	0.282878	0.428389	-0.539747	0.107318	-0.11224	0.757545
QqXijd7mX155.pBDA4	ILMN_3004151	1600002K03RIK	-1.06718	0.273553	0.998485	-1.00409	0.898373	0.985473	1.03859	0.136753	0.998969	-1.0215	0.297805	0.800704	-0.143745	0.691974	-0.453119	0.188467	-0.0754139	0.835967
TIJ6f3Ol.11HPcEu90	ILMN_3009738	1600012H06RIK	-1.0162	0.633585	0.998485	1.03405	0.277091	0.891024	1.02806	0.392656	0.998969	1.00247	0.923989	0.991652	-0.202979	0.573829	0.477828	0.162486	-0.346661	0.326426
fXqgOJT93h.v0Ksgvk	ILMN_2718861	1600012H06RIK	1.0217	0.454446	0.998485	-1.01718	0.594781	0.939387	1.0186	0.628753	0.998969	1.01156	0.559755	0.912546	-0.0776568	0.831146	0.209447	0.561409	0.321166	0.36554
Bn.4BR4nnJRoJ6L_l4	ILMN_2822842	1600014C10RIK	1.03464	0.327929	0.998485	-1.00024	0.99308	0.999326	1.007	0.836687	0.998969	-1.09498	0.0140409	0.380549	-0.597044	0.0683973	0.210122	0.56012	0.304815	0.391792
oqC1N2t.PBVjhtGKVQ	ILMN_1212632	1600021P15RIK	1.04278	0.200903	0.998485	-1.02318	0.276124	0.891024	1.04702	0.0534967	0.998969	1.01769	0.332769	0.825167	-0.414016	0.234265	-0.748614	0.0127335	0.537041	0.109438
QIHXSH6rkCCqSEJoJk	ILMN_2805631	1600027N09RIK	-1.01309	0.556227	0.998485	-1.03778	0.129188	0.865421	NA	NA	NA	NA	NA	NA	0.170134	0.638419	-0.19166	0.595809	NA	NA
fq4gVWTQp6gBQjbnn8	ILMN_2868440	1700003F12RIK	1.00382	0.83536	0.998485	NA	NA	NA	NA	NA	NA	NA	NA	NA	0.344448	0.329733	NA	NA	NA	NA
01K4QdRSjVTUho3cZE	ILMN_3003018	1700007G11RIK	1.00307	0.923549	0.998485	NA	NA	NA	-1.00713	0.707138	0.998969	-1.01151	0.573244	0.915882	0.150901	0.677319	NA	NA	0.656067	0.0393944
fq66sRDHnSCqwK1VDc	ILMN_2660924	1700013N18RIK	1.02366	0.226162	0.998485	NA	NA	NA	NA	NA	NA	NA	NA	NA	-0.309447	0.384265	NA	NA	NA	NA
uklSdwqYUZkycf4pdg	ILMN_1250938	1700016K19RIK	-1.04626	0.349347	0.998485	1.0152	0.650667	0.952503	1.00607	0.750155	0.998969	-1.03211	0.203391	0.730075	0.561545	0.0911848	-0.319776	0.367738	0.506419	0.135265
BiVrnuNrleNfg9khbc	ILMN_2646640	1700019D03RIK	-1.07295	0.208329	0.998485	1.0488	0.242083	0.883779	-1.0872	0.013523	0.998969	-1.00328	0.899136	0.988827	0.528939	0.115941	0.0365769	0.920095	-0.054042	0.882128
xqFNysTeFSiTR4k.gQ	ILMN_1236344	1700019E19RIK	-1.02734	0.633955	0.998485	1.01589	0.737284	0.966315	-1.00356	0.899829	0.998969	1.03281	0.208285	0.73431	0.235804	0.511916	-0.218057	0.545042	0.223364	0.535048
lnSiHeiJvXd47RUpLA	ILMN_2758803	1700019G17RIK	-1.01628	0.570768	0.998485	1.01449	0.449847	0.913041	-1.03373	0.220045	0.998969	-1.00023	0.989806	0.998817	-0.0837885	0.817994	-0.544145	0.103928	-0.756194	0.011379
Q0L.vtLPgjReSV8COk	ILMN_2673628	1700020O03RIK	-1.03581	0.286024	0.998485	1.00482	0.841159	0.97923	1.00185	0.916409	0.998969	-1.03381	0.142391	0.675683	-0.405009	0.245624	0.396275	0.256927	-0.0194646	0.957437
QdXp875Ae8cDReVQ9Q	ILMN_1232146	1700021C14RIK	-1.10331	0.0547026	0.998485	1.02427	0.443701	0.913041	1.00235	0.905387	0.998969	-1.01023	0.708197	0.954815	0.256966	0.473557	-0.177985	0.62276	-0.178908	0.620927
Z4Igh4gYQkWrrvmWOg	ILMN_2761181	1700021F05RIK	-1.04049	0.515311	0.998485	-1.02721	0.570831	0.935668	-1.00782	0.773412	0.998969	-1.04797	0.0244454	0.44442	0.331331	0.349676	-0.134139	0.711793	0.198133	0.583202
iX3InXi1ntPHRQMVO0	ILMN_2741006	1700021K19RIK	1.03644	0.302448	0.998485	1.08895	0.0630904	0.865421	1.01019	0.773599	0.998969	-1.01418	0.636291	0.935148	0.252004	0.482436	0.224908	0.532154	0.118409	0.744581
Z7JPp.50jkDoLuFG4U	ILMN_2669982	1700025G04RIK	1.03427	0.566099	0.998485	1.01552	0.768242	0.970456	1.01297	0.745757	0.998969	1.05663	0.0603478	0.551511	0.393125	0.261073	0.101497	0.780248	-0.0025037	0.994523
Hk08Lfe2KvhytCrDqU	ILMN_1214517	1700025K23RIK	-1.08129	0.168427	0.998485	1.0189	0.54576	0.931317	-1.01459	0.648356	0.998969	1.00371	0.918624	0.991652	0.248235	0.489228	-0.426768	0.218699	-0.0227997	0.950151
fqE3NefqUVa1_REH_E	ILMN_1250435	1700029G01RIK	-1.01646	0.42288	0.998485	-1.01328	0.582576	0.938715	1.00251	0.904225	0.998969	1.03525	0.0792131	0.588887	-0.355402	0.313539	-0.200213	0.579172	0.202151	0.575428
6p4c8c47gXuOoFWTAk	ILMN_2632536	1700029I15RIK	1.01029	0.620949	0.998485	NA	NA	NA	NA	NA	NA	NA	NA	NA	-0.199364	0.580816	NA	NA	NA	NA
o0iLEQb3oEDp1OmrAo	ILMN_2723346	1700029J07RIK	-1.01871	0.453468	0.998485	1.00848	0.653012	0.953477	-1.01498	0.445116	0.998969	-1.00028	0.988431	0.998221	-0.253343	0.480032	0.173189	0.63231	0.174371	0.629952
W5QHMI42LqVlqCeY54	ILMN_3121687	1700029P11RIK	-1.12366	0.128762	0.998485	-1.01535	0.640284	0.94966	-1.00581	0.835669	0.998969	1.03964	0.11111	0.632215	0.249741	0.486508	-0.149997	0.679165	0.12581	0.729106
3menqknYgi.vItf_1E	ILMN_1231468	1700030J22RIK	1.00467	0.885568	0.998485	1.00131	0.962178	0.994812	1.0303	0.254882	0.998969	-1.04392	0.0224713	0.435658	-0.543134	0.104701	-0.76472	0.00998006	0.134855	0.710311
3k3NSJJeRLN3TUScig	ILMN_2705655	1700030K09RIK	-1.04204	0.327531	0.998485	-1.02276	0.401824	0.904004	-1.05124	0.0707001	0.998969	-1.01954	0.501738	0.899728	-0.41235	0.236343	-0.23428	0.544024	-0.60721	0.0828912
QgaN73R7hXQ931IO9I	ILMN_2685133	1700034H14RIK	-1.04364	0.182337	0.998485	-1.01947	0.621424	0.947286	-1.05894	0.0639979	0.998969	1.04593	0.0722799	0.579917	0.593137	0.0707001	0.166497	0.645718	0.0858762	0.813525
0kKBrE5ILoIgVKi6Us	ILMN_2897476	1700034H14RIK	-1.03222	0.298081	0.998485	-1.02795	0.475972	0.915974	1.01813	0.489532	0.998969	1.02263	0.358645	0.8391	0.648978	0.0423306	-0.181997	0.614809	0.0217253	0.952498
B_xJOaIJ5GrX6kpL74	ILMN_2732877	1700034H14RIK	-1.00106	0.965187	0.998485	-1.03967	0.406138	0.905432	-1.01239	0.619595	0.998969	1.03204	0.25798	0.77295	0.547875	0.101108	-0.251206	0.48387	-0.279701	0.433815
TUrBJT50lfeglR_VKg	ILMN_2800500	1700037C18RIK	1.00411	0.830228	0.998485	NA	NA	NA	NA	NA	NA	-1.02616	0.157958	0.688434	0.336623	0.341559	NA	NA	NA	NA
rS7x4oKvbVJpLXVT4g	ILMN_1250924	1700037C18RIK	-1.04106	0.10441	0.998485	NA	NA	NA	NA	NA	NA	NA	NA	NA	0.515334	0.127394	NA	NA	NA	NA
lVcVXSt7rH6.8Dh6_o	ILMN_1213070	1700037H04RIK	1.05341	0.394012	0.998485	1.03166	0.673968	0.956755	1.0302	0.600676	0.998969	1.05419	0.105828	0.622341	-0.225364	0.531301	-0.613305	0.0593412	-0.713084	0.0206105
QpeaoHSQaffzUoUjZ0	ILMN_2881024	1700040I03RIK	1.03245	0.34223	0.998485	1.03594	0.328715	0.895167	1.06471	0.0183897	0.998969	-1.00123	0.966042	0.997417	-0.145453	0.708861	-0.656546	0.0547553	0.570205	0.0852335
9b9LR_VD_XN31OqYVk	ILMN_2967255	1700045I19RIK	NA	NA	NA	-1.01927	0.464217	0.914237	NA	NA	NA	-1.00412	0.832733	0.979976	NA	NA	-0.01909	0.958256	NA	NA
3SefIK_X.0VL8Rzc8o	ILMN_2986059	1700049G17RIK	-1.00851	0.76311	0.998485	NA	NA	NA	NA	NA	NA	NA	NA	NA	-0.569797	0.0855083	NA	NA	NA	NA
c5H6.p34vLpUuBE5fs	ILMN_2985579	1700052N19RIK	1.1053	0.0155817	0.986074	1.00721	0.798822	0.974384	1.03126	0.377744	0.998969	-1.012	0.613894	0.929414	0.183819	0.61121	-0.626157	0.0527713	-0.176023	0.626661
uOeC1WUS47UjiVJtLc	ILMN_1260593	1700052N19RIK	1.00151	0.950826	0.998485	1.0277	0.403964	0.905432	1.01427	0.711452	0.998969	-1.00106	0.973698	0.997506	0.262233	0.464211	-0.23809	0.507712	-0.153877	0.671251
x9EimuglASunSSgmiE	ILMN_2890399	1700071K01RIK	-1.01683	0.470055	0.998485	-1.05645	0.0796583	0.865421	1.01867	0.471886	0.998969	-1.01293	0.462063	0.885498	0.18862	0.601762	-0.446009	0.196367	0.0918526	0.800759
6XaoV5X.v6311wwEKU	ILMN_1229202	1700084C01RIK	-1.0529	0.0454248	0.998485	-1.06483	0.25228	0.883779	-1.0099	0.62479	0.998969	-1.02125	0.346985	0.831651	-0.154985	0.668998	-0.325815	0.358241	-0.34222	0.333078
BWCd5jnyLlF560DpMk	ILMN_2862026	1700084C01RIK	-1.11708	0.000196514	0.299776	-1.07556	0.131803	0.865421	1.00037	0.986736	0.998969	1.01651	0.489466	0.895877	-0.236461	0.510705	0.493385	0.147299	-0.299296	0.400852
HdeO0Sel0rne.5f3gU	ILMN_1239196	1700088E04RIK	-1.02398	0.634326	0.998485	-1.00247	0.951713	0.994451	1.03117	0.1974	0.998969	-1.03901	0.142824	0.675683	-0.13289	0.714383	-0.576155	0.0812936	0.00322173	0.992953
Z6Nh4qx6tu0KaSijqA	ILMN_2736976	1700093K21RIK	-1.01748	0.49908	0.998485	NA	NA	NA	NA	NA	NA	NA	NA	NA	-0.216336	0.548298	NA	NA	NA	NA
Zo65ffQcfr_TQjUSIU	ILMN_2596569	1700113I22RIK	1.02418	0.543085	0.998485	1.0425	0.205876	0.878521	-1.02189	0.358523	0.998969	1.00248	0.912036	0.991054	0.211453	0.55758	0.288452	0.418944	-0.296341	0.405746
9.m_KEkWG0u50_KFFk	ILMN_2662036	1700113I22RIK	NA	NA	NA	NA	NA	NA	NA	NA	NA	-1.00168	0.917356	0.991652	NA	NA	NA	NA	NA	NA
lgpyR7.xXLrO0Xod3U	ILMN_2999447	1700123O20RIK	1.01517	0.699606	0.998485	-1.06856	0.187803	0.875854	-1.02258	0.487633	0.998969	1.05099	0.170063	0.702725	0.043548	0.904919	-0.0942497	0.795651	-0.000404789	0.999115
HitLiUj9umC.xQkunk	ILMN_2597332	1700123O20RIK	-1.01443	0.592989	0.998485	-1.03169	0.333007	0.896238	1.01074	0.606636	0.998969	-1.03177	0.0864218	0.596886	0.0786674	0.840564	-0.2515	0.483342	-0.135773	0.72762
okqdlX3ReIQJu73Tug	ILMN_2839145	1810008A18RIK	-1.00972	0.899875	0.998485	1.03973	0.458832	0.913064	-1.0787	0.115296	0.998969	-1.02678	0.41862	0.86822	-0.290891	0.414841	-0.0413857	0.909624	0.361828	0.338646
lrWGwvO7cKfpInkSek	ILMN_2839142	1810008A18RIK	1.0063	0.895361	0.998485	1.06214	0.149567	0.866502	-1.02537	0.616325	0.998969	1.00624	0.817985	0.977542	-0.273809	0.443964	0.240521	0.503256	0.0214117	0.953183
KSUSVCQQCCMAnVShsk	ILMN_2872246	1810009A15RIK	-1.07242	0.139368	0.998485	-1.02229	0.312002	0.892958	1.02506	0.228359	0.998969	-1.00145	0.940858	0.993684	0.280354	0.432697	0.0746889	0.837526	-0.030911	0.932447
fzwkqNphoBlK62qe4w	ILMN_1221262	1810009A15RIK	-1.11527	0.112758	0.998485	-1.03507	0.442544	0.913041	1.02654	0.336649	0.998969	-1.00006	0.997322	0.999194	0.429267	0.21572	-0.504728	0.136791	-0.288645	0.418618
cqPhJChuC4LTqQSguc	ILMN_2764607	1810009N02RIK	-1.00458	0.928006	0.998485	1.04751	0.149495	0.866502	-1.02246	0.443967	0.998969	1.01044	0.749229	0.961433	0.341541	0.334101	0.29995	0.399775	0.253454	0.479833
TVX1OH7iPjaoqLT7Qk	ILMN_1251065	1810014F10RIK	-1.07299	0.397575	0.998485	1.06289	0.172895	0.872609	-1.01077	0.765796	0.998969	-1.02454	0.412435	0.865008	0.0357903	0.921809	-0.125352	0.730061	0.0432717	0.90552
f6hI_uop4pEr.kdSvk	ILMN_2896944	1810020D17RIK	-1.05863	0.473085	0.998485	-1.04266	0.436895	0.913041	1.01387	0.607905	0.998969	1.02968	0.324697	0.817675	0.196012	0.587321	-0.105914	0.770895	-0.181671	0.615454
HriunSSqCE70tCkFF4	ILMN_2912439	1810026J23RIK	1.05546	0.0692123	0.998485	1.03688	0.203397	0.875854	1.00696	0.800377	0.998969	-1.03667	0.182476	0.71364	-0.362635	0.303081	-0.160567	0.657676	0.474688	0.165661
Zqen5fp._C3fvwmVLU	ILMN_2875089	1810027O10RIK	-1.17506	0.148055	0.998485	1.02264	0.666758	0.955814	1.00119	0.973885	0.998969	1.00831	0.772031	0.966424	0.263059	0.462753	-0.616198	0.0578175	-0.576362	0.0811584
ELqHB559fSui7zzKdY	ILMN_2873180	1810030N24RIK	-1.03427	0.650151	0.998485	1.02086	0.619568	0.946819	1.05382	0.0965325	0.998969	1.0219	0.457908	0.884316	0.243101	0.498545	0.25922	0.469546	-0.614864	0.0585168
rU.k6L9wb.Iuj7l.kk	ILMN_1221983	1810030N24RIK	-1.09647	0.303896	0.998485	1.00795	0.784556	0.972986	1.04129	0.343823	0.998969	1.03697	0.379991	0.849057	0.245798	0.493641	-0.339252	0.337562	0.102905	0.777265
BnAyfel3igdIenrSeU	ILMN_1246756	1810030N24RIK	-1.02942	0.409734	0.998485	1.017	0.516845	0.924789	-1.01007	0.597497	0.998969	1.00078	0.964828	0.997417	0.404442	0.24635	-0.459194	0.181867	0.161188	0.656421
9m.tIAPX6FmkmLieIg	ILMN_2684667	1810035L17RIK	-1.17633	0.182513	0.998485	-1.0112	0.868489	0.981842	-1.03158	0.331355	0.998969	1.03144	0.397022	0.855605	0.338897	0.3381	-0.638965	0.046723	0.00181995	0.996019
Bb0J0CJAp.kaJ0BN44	ILMN_1239860	1810035L17RIK	-1.28385	0.00903196	0.936004	-1.08564	0.367692	0.899257	-1.00374	0.969463	0.998969	1.04972	0.246287	0.766367	0.348191	0.324151	0.173538	0.631613	0.0236591	0.948275
ENeHlM_ceeaiejGiqc	ILMN_2706652	1810043G02RIK	-1.03293	0.467481	0.998485	-1.04338	0.136514	0.865421	-1.00223	0.938751	0.998969	1.02283	0.458844	0.884316	0.73308	0.0158553	-0.356694	0.311657	0.251095	0.48407
lje5XeS.rXdVJukMX8	ILMN_1250709	1810046J19RIK	-1.12732	0.112815	0.998485	1.02466	0.657201	0.953578	-1.03837	0.303832	0.998969	-1.00524	0.838723	0.981496	0.254155	0.478578	-0.191572	0.595981	-0.123386	0.734165
utJb0Dh0hBK13u3Buo	ILMN_2856187	1810048J11RIK	1.05144	0.391964	0.998485	-1.01727	0.619214	0.946819	1.01135	0.73015	0.998969	-1.07845	0.0280625	0.450011	0.167758	0.643183	0.656068	0.0393942	-0.0294793	0.93557
HXVFB55OLp5XB7s6sg	ILMN_2680665	1810049H13RIK	-1.054	0.371036	0.998485	1.01463	0.585991	0.939093	-1.00925	0.71977	0.998969	-1.04101	0.11003	0.630996	0.637737	0.0472817	-0.572831	0.0834801	0.326627	0.356975
cfUjX9rkP0ie5SOchE	ILMN_2650275	1810055G02RIK	-1.02721	0.445587	0.998485	1.00445	0.875796	0.982265	1.01001	0.714914	0.998969	1.03252	0.251488	0.77025	-0.0191185	0.958193	-0.358443	0.343519	0.597987	0.0678492
fUt9Eth4A9cp396H9E	ILMN_1235281	1810063B05RIK	-1.10962	0.203577	0.998485	1.00209	0.958501	0.994812	-1.02712	0.628138	0.998969	1.03215	0.370703	0.844046	0.373209	0.288128	0.237471	0.508848	0.0409016	0.910677
N66dEFN7BCF45Xfeu0	ILMN_2858523	1810064F22RIK	-1.0392	0.144387	0.998485	1.0167	0.757119	0.968443	-1.03125	0.439363	0.998969	1.06743	0.0882659	0.599853	-0.452494	0.189154	0.452095	0.189593	-0.481695	0.158627
NZF6Cu7VEjTZv30SQA	ILMN_1238246	1810074P20RIK	-1.02829	0.474626	0.998485	1.03303	0.351748	0.898965	1.01002	0.721727	0.998969	1.02301	0.197449	0.729218	-0.354909	0.314259	0.401455	0.250189	-0.126534	0.727596
Eh6kqIo1tCY4PIQoEE	ILMN_2927924	1810074P20RIK	1.018	0.518245	0.998485	1.01157	0.657625	0.953768	-1.0009	0.976901	0.998969	-1.05603	0.0500418	0.520722	0.185725	0.607453	0.094965	0.794127	-0.284487	0.425651
03FiF64t5K5WKJKx4E	ILMN_1227103	2010007H12RIK	-1.00457	0.886182	0.998485	-1.02274	0.584506	0.938971	1.01809	0.515318	0.998969	1.05796	0.0175717	0.396521	0.256293	0.505625	0.025825	0.943546	0.272967	0.445422
uX905No54pnqCbJXTA	ILMN_2662283	2010007H12RIK	-1.03697	0.471496	0.998485	-1.01417	0.768215	0.970456	1.00527	0.828746	0.998969	1.06066	0.0599394	0.550066	0.494819	0.145944	0.0869544	0.811219	-0.631665	0.0501098
0rgkHAkWzCUkKZEiec	ILMN_2702016	2010011I20RIK	1.0689	0.123651	0.998485	1.03191	0.436288	0.913041	-1.00916	0.714407	0.998969	-1.00341	0.882746	0.985977	-0.539925	0.10718	0.213417	0.553839	0.0242816	0.946915
KUcqL.Ezy7vgq0bQUw	ILMN_2748300	2010012O05RIK	-1.00864	0.82756	0.998485	1.04786	0.169608	0.869736	1.00493	0.913111	0.998969	1.02961	0.359904	0.839696	0.370407	0.292052	0.160216	0.658385	0.24194	0.500663
urF_xHzx7dLb5_i2wo	ILMN_1252689	2010106G01RIK	1.0463	0.163663	0.998485	-1.02885	0.347814	0.898965	1.00406	0.83026	0.998969	1.01171	0.477329	0.892591	-0.295951	0.406393	0.167689	0.643322	-0.011917	0.973935
NVOlNHB51g1EI4Ibac	ILMN_1239677	2010107E04RIK	-1.15158	0.174242	0.998485	1.00776	0.770155	0.970713	1.01512	0.563887	0.998969	-1.01685	0.565573	0.914342	0.451419	0.190339	-0.203295	0.573219	-0.0579823	0.873589
xAkJyo56Ivp1OvCBHI	ILMN_2975295	2010107G12RIK	NA	NA	NA	NA	NA	NA	NA	NA	NA	-1.02713	0.178858	0.710591	NA	NA	NA	NA	NA	NA
foSJNpUrrh4DnvcCKw	ILMN_2838372	2010111I01RIK	-1.03994	0.12422	0.998485	-1.02455	0.3428	0.898965	1.02952	0.208707	0.998969	1.01314	0.514507	0.900776	0.230242	0.522207	-0.374801	0.285913	-0.108412	0.765616
E_t8j_iEiGrjd_L6KU	ILMN_2869524	2010305A19RIK	-1.00838	0.790574	0.998485	-1.00786	0.780715	0.972677	1.00712	0.691524	0.998969	-1.00659	0.729553	0.957813	-0.554575	0.0961627	0.0753563	0.836091	0.104859	0.773126
in3rs1QrET.yHsFEM4	ILMN_1217039	2010321M09RIK	1.04322	0.281533	0.998485	1.00326	0.910229	0.989296	-1.02859	0.331159	0.998969	-1.0191	0.531478	0.904384	-0.527294	0.117291	-0.0132963	0.97092	-0.268118	0.453866
3pJSpbck1ICYd9O3Q8	ILMN_3124226	2010321M09RIK	1.04419	0.142897	0.998485	-1.01656	0.506626	0.920144	1.01324	0.569397	0.998969	-1.03515	0.240083	0.763933	-0.101245	0.780784	-0.134701	0.710631	0.189641	0.599761
llLPJcjd0ik8JAkJio	ILMN_1256157	2200002K05RIK	1.01322	0.66025	0.998485	-1.00968	0.678879	0.957087	-1.00108	0.963763	0.998969	-1.02051	0.312751	0.808614	-0.152526	0.674003	0.0591814	0.870993	-0.339556	0.3371
QyEnWCXdIHVt53f53E	ILMN_2751248	2210012G02RIK	-1.01229	0.592026	0.998485	NA	NA	NA	-1.01042	0.612743	0.998969	1.00409	0.819206	0.977542	0.0617356	0.865467	NA	NA	-0.464162	0.176573
oEitOowMQWHcl0L0W0	ILMN_1247919	2210012G02RIK	-1.01514	0.634377	0.998485	-1.01678	0.457128	0.913041	1.00979	0.628378	0.998969	1.01889	0.399278	0.857415	0.462245	0.178605	-0.0435456	0.904924	0.580555	0.0784562
9von140BQIAXL55fEI	ILMN_1226642	2210012G02RIK	1.04513	0.12361	0.998485	NA	NA	NA	1.00503	0.751696	0.998969	-1.0049	0.804152	0.973825	0.444445	0.19813	NA	NA	-0.405958	0.244413
c0TU1WilMIKCXdQhXk	ILMN_1247760	2210016L21RIK	-1.05482	0.548062	0.998485	-1.01842	0.560152	0.932125	1.04293	0.458957	0.998969	-1.01669	0.565296	0.914342	0.64246	0.0451565	-0.144894	0.689616	0.0684761	0.850909
H9E1NVopTCCgl3UIV4	ILMN_2622891	2210016L21RIK	-1.05003	0.649517	0.998485	-1.05418	0.145908	0.866429	1.00218	0.945548	0.998969	1.0198	0.53202	0.904552	0.6839	0.0291947	-0.227562	0.527196	-0.0267946	0.941429
fClK.etdp3a5Lu5JKc	ILMN_2781118	2210021J22RIK	-1.01194	0.753429	0.998485	-1.00888	0.669671	0.955862	1.01322	0.648412	0.998969	-1.03815	0.134212	0.664879	0.228833	0.524826	-0.493445	0.177047	0.152438	0.674182
6ovpS7U5724wqZ4oEE	ILMN_2716783	2210404J11RIK	1.00646	0.793591	0.998485	-1.00298	0.915227	0.991129	1.01125	0.678861	0.998969	-1.02276	0.265853	0.777817	-0.363966	0.301176	-0.274684	0.442449	0.0214639	0.953069
Bt7VPk.xbRVJESUF3o	ILMN_3138222	2210404J11RIK	-1.00053	0.983291	0.998485	-1.04266	0.0806851	0.865421	1.00307	0.906219	0.998969	-1.00672	0.798437	0.971728	-0.266624	0.456483	0.454314	0.187158	-0.245048	0.495002
f0dKCLqf56NfdIIt3M	ILMN_3129372	2210418O10RIK	-1.04423	0.345332	0.998485	-1.02218	0.666005	0.955814	1.07144	0.105443	0.998969	1.04967	0.220741	0.744816	0.317067	0.372038	-0.148325	0.682583	-0.0752589	0.8363
NulKKP0_r9.eHl91Ho	ILMN_2799667	2310001A20RIK	1.06068	0.400501	0.998485	-1.01533	0.621867	0.947368	-1.01832	0.539491	0.998969	1.02159	0.428446	0.870661	-0.353541	0.31626	-0.0121039	0.973527	-0.188968	0.60108
ETjoIRRd5TlezViJ5E	ILMN_1244393	2310003C23RIK	-1.01503	0.643761	0.998485	1.02812	0.52443	0.926749	1.02795	0.432565	0.998969	1.02898	0.233727	0.757873	0.218969	0.571361	-0.43131	0.213302	-0.0507821	0.8892
BpDuuinfPlcFB4w7n8	ILMN_1257360	2310003F16RIK	-1.17642	0.0731033	0.998485	-1.04625	0.297142	0.891024	1.00902	0.752425	0.998969	-1.02956	0.241825	0.763933	0.268941	0.452428	-0.0931424	0.798009	0.114375	0.753053
iiqJu1Eid7l5177e3s	ILMN_1238640	2310003H01RIK	1.02729	0.697869	0.998485	-1.01215	0.717453	0.961735	-1.01991	0.565646	0.998969	1.02392	0.439692	0.875126	-0.577493	0.0804236	-0.144162	0.691117	-0.0177555	0.961172
HW7T_iJyQBwOO07ZOI	ILMN_1216813	2310003L22RIK	-1.05684	0.344467	0.998485	-1.08292	0.364915	0.899257	-1.06672	0.579031	0.998969	-1.03299	0.235138	0.758739	-0.370044	0.292562	0.206331	0.567381	-0.00315941	0.993089
o9_gSAJXnkWIRDnpJ4	ILMN_2747677	2310003L22RIK	-1.06786	0.189356	0.998485	-1.04345	0.456255	0.913041	-1.01125	0.68371	0.998969	-1.00314	0.890423	0.987181	0.593994	0.0701907	-0.427765	0.217508	0.0382243	0.916506
Zp_gcbo53tDTOt0Qu4	ILMN_1226476	2310004I24RIK	-1.07157	0.014054	0.972566	-1.00096	0.968933	0.996149	-1.01543	0.438187	0.998969	1.01656	0.386373	0.851796	0.658115	0.0385726	-0.751913	0.0121309	-0.374737	0.286002
ia7pDqIegSCUgjopF8	ILMN_2964816	2310008H04RIK	1.00224	0.910127	0.998485	NA	NA	NA	NA	NA	NA	NA	NA	NA	-0.415962	0.265478	NA	NA	NA	NA
TCfOrp.CTe1W09JZXU	ILMN_2699624	2310008H09RIK	-1.02881	0.264244	0.998485	-1.02935	0.204913	0.877962	1.00475	0.842215	0.998969	1.0118	0.574295	0.915882	0.0918716	0.800718	0.0581148	0.873302	0.0709035	0.845676
Wd4pWArfcT4Wg5dQtw	ILMN_1225520	2310008H09RIK	-1.03815	0.284759	0.998485	-1.0373	0.305535	0.891024	-1.00066	0.977888	0.998969	-1.01395	0.575232	0.915882	0.0363132	0.920669	-0.174901	0.628895	0.267895	0.454258
645eBEvdXwlKcjR6sU	ILMN_1219918	2310011J03RIK	1.01378	0.720423	0.998485	-1.00587	0.826461	0.977477	-1.01238	0.613903	0.998969	-1.00207	0.945286	0.994648	0.659547	0.0380048	0.246963	0.521766	-0.0863526	0.812506
l6Fws33vr8U_Ld9XiI	ILMN_2926198	2310016C08RIK	-1.00507	0.908708	0.998485	-1.02064	0.367205	0.899257	1.06746	0.0133118	0.998969	1.0058	0.830475	0.979312	0.443795	0.198866	-0.274147	0.443378	-0.0320617	0.929937
r0YqtJyUERJdcKl5SE	ILMN_1239221	2310016C08RIK	-1.03023	0.127586	0.998485	-1.04397	0.0468572	0.865421	1.00476	0.800351	0.998969	1.01111	0.486498	0.895877	0.00418087	0.991483	-0.716674	0.0298157	0.216965	0.574977
WAI.15O0FekIHKVU5c	ILMN_1249408	2310016M24RIK	-1.08071	0.382056	0.998485	1.02993	0.594523	0.939387	1.01282	0.594502	0.998969	-1.03727	0.138581	0.671772	0.386171	0.270355	-0.533895	0.111935	-0.00505308	0.988947
KSBdAZJASFCi_6Sat0	ILMN_1217926	2310021P13RIK	-1.08373	0.200568	0.998485	1.00464	0.924438	0.992071	-1.03645	0.191169	0.998969	-1.01068	0.71742	0.956251	0.460292	0.180689	0.710316	0.0213384	0.156741	0.66543
BgIeoeCqOOmEvdOuKU	ILMN_3004931	2310022A10RIK	-1.02917	0.20095	0.998485	1.02508	0.268686	0.887879	1.01972	0.42677	0.998969	-1.00003	0.998734	0.999603	0.403438	0.247637	0.358436	0.309129	0.206344	0.567355
0U99HWV3X_MTH9gOsA	ILMN_1257333	2310022B05RIK	-1.02834	0.776971	0.998485	-1.13991	0.289101	0.891024	1.00162	0.976721	0.998969	-1.05036	0.181214	0.713469	-0.516462	0.126419	-0.2687	0.452849	-0.0356512	0.922112
QVkhhCEgneOHiDpxFA	ILMN_2751887	2310033P09RIK	-1.01664	0.583534	0.998485	1.02187	0.446321	0.913041	-1.02585	0.246892	0.998969	-1.03067	0.117161	0.639068	0.687731	0.0279494	-0.639143	0.0466422	-0.257715	0.472222
HN5AagoohViiCpuhac	ILMN_1232120	2310033P09RIK	-1.01274	0.88199	0.998485	1.03988	0.140093	0.865421	1.02574	0.412176	0.998969	-1.0215	0.32621	0.818941	0.643984	0.044485	-0.381992	0.276019	0.0500932	0.890696
urJ0ir7153Tx3dS4V4	ILMN_2642411	2310035C23RIK	1.03906	0.361358	0.998485	1.04398	0.127813	0.865421	1.00526	0.809651	0.998969	1.00124	0.945099	0.994648	-0.352934	0.31715	0.434993	0.241947	0.0977868	0.788125
0LkiSqj3mvXzuU5Vbs	ILMN_2646771	2310035K24RIK	1.00282	0.957882	0.998485	-1.01021	0.827919	0.977477	1.02286	0.350294	0.998969	-1.07772	0.0180435	0.400085	-0.344447	0.329734	-0.277247	0.438029	0.227026	0.528194
BV1audHF6h3eY7Ewz8	ILMN_1229716	2310036O22RIK	-1.02071	0.79234	0.998485	-1.05723	0.294428	0.891024	1.04869	0.374791	0.998969	-1.00803	0.836829	0.981035	0.526898	0.117617	-0.45402	0.187479	0.030848	0.932584
ulckfTnQOCCJBUpXOo	ILMN_1230221	2310037I24RIK	-1.00354	0.883062	0.998485	NA	NA	NA	1.02257	0.348712	0.998969	-1.00201	0.924078	0.991652	0.286618	0.422041	NA	NA	0.120678	0.739829
Zb9fuB7B4gCSdErep0	ILMN_2879506	2310037I24RIK	1.01604	0.454175	0.998485	1.03409	0.193004	0.875854	-1.00943	0.7182	0.998969	-1.01805	0.556802	0.910537	-0.197947	0.609681	-0.415717	0.232153	0.342719	0.332326
c0hOiK4V4S4JYyTIS4	ILMN_2625058	2310037I24RIK	1.03747	0.223632	0.998485	-1.00326	0.868677	0.981957	-1.00828	0.763072	0.998969	1.00033	0.988027	0.998221	-0.327606	0.355449	0.0785537	0.82922	-0.100637	0.782072
QoSRBdehWfveOMWMBY	ILMN_2619836	2310039H08RIK	-1.07573	0.315364	0.998485	-1.02185	0.527382	0.928094	1.03915	0.184312	0.998969	-1.03416	0.127026	0.655228	0.272785	0.445738	-0.524064	0.119968	-0.11255	0.756893
TrXyjro8d6edIqgRJE	ILMN_2957987	2310042D19RIK	-1.01396	0.589417	0.998485	1.02296	0.290123	0.891024	NA	NA	NA	NA	NA	NA	0.0770952	0.832353	-0.375339	0.285166	NA	NA
cvt37e5d1S_.e4qADg	ILMN_2689138	2310044G17RIK	1.10198	0.0860028	0.998485	-1.04633	0.136055	0.865421	1.0481	0.111191	0.998969	-1.01835	0.461961	0.885498	-0.496078	0.144761	0.227668	0.526998	0.0262795	0.942553
lSXo3tFKIo_6l1G8t4	ILMN_2783457	2310044H10RIK	1.03885	0.480465	0.998485	-1.04516	0.21336	0.883043	-1.02232	0.473986	0.998969	1.00582	0.797912	0.97168	-0.209409	0.561482	-0.402107	0.249348	0.0838508	0.817861
ohLmhdAKrJ0pKOL9t4	ILMN_2675760	2310046K01RIK	1.00134	0.966056	0.998485	-1.01331	0.534049	0.928637	1.00659	0.72208	0.998969	-1.02004	0.301425	0.800974	-0.109433	0.763462	-0.173368	0.631951	0.220625	0.540195
HSy7UnKKjIDqSe8qhI	ILMN_2651698	2310046O06RIK	1.01936	0.362801	0.998485	1.01406	0.531626	0.928637	1.02702	0.100815	0.998969	1.003	0.877736	0.985484	0.123017	0.734935	-0.207406	0.565317	0.52266	0.121144
WSu17KUufXnCEhU.e4	ILMN_2543108	2310047D13RIK	-1.01807	0.555903	0.998485	-1.04128	0.254299	0.884118	-1.04664	0.0581249	0.998969	1.032	0.152196	0.682303	-0.0473936	0.896559	-0.120021	0.741203	-0.355219	0.313807
Kac1o1Q60RF0LlKp.I	ILMN_2645763	2310047M10RIK	1.01788	0.531215	0.998485	-1.0732	0.0572857	0.865421	1.01716	0.614392	0.998969	-1.0254	0.276923	0.783677	0.0649321	0.858558	-0.486827	0.153591	0.134974	0.710064
NpGqi7dHndKvWtg_8c	ILMN_2946608	2310047M10RIK	1.0057	0.942951	0.998485	-1.01116	0.856877	0.980519	1.00615	0.884211	0.998969	-1.02044	0.437977	0.874441	-0.275554	0.440946	-0.54838	0.100729	-0.0674258	0.853175
6ISKJzYp6SnOpdoW0c	ILMN_1235207	2310057J16RIK	1.00448	0.867161	0.998485	1.02251	0.464103	0.914237	1.00352	0.844906	0.998969	-1.00776	0.707752	0.954731	0.0279504	0.938906	0.20377	0.572305	0.394363	0.259439
KXcod.s4Aud4IGgUyo	ILMN_2703204	2310061C15RIK	-1.02503	0.57989	0.998485	-1.05393	0.0982091	0.865421	1.02729	0.43952	0.998969	-1.01274	0.613996	0.929414	0.440094	0.203085	0.328012	0.354817	0.268027	0.454026
l9COezXXlTtU31WkKk	ILMN_1245489	2310067B10RIK	-1.03225	0.347443	0.998485	1.07839	0.156619	0.869529	1.01315	0.623761	0.998969	-1.02443	0.365961	0.842755	0.267125	0.455605	0.34802	0.324406	0.179503	0.619747
WeH650SkXR6o84Uq3I	ILMN_2673380	2400001E08RIK	-1.15201	0.133847	0.998485	1.00187	0.960858	0.994812	1.04583	0.378725	0.998969	1.01076	0.691046	0.949133	0.325201	0.359201	-0.403276	0.247845	-0.0927263	0.798896
Qnxeyz97Exe.UkH0u0	ILMN_2976120	2400003C14RIK	-1.00014	0.998213	0.999399	1.06391	0.127562	0.865421	-1.00999	0.800074	0.998969	1.03227	0.38756	0.852644	-0.535765	0.110447	-0.0119927	0.97377	-0.0115602	0.974716
ExSl.XBPRUXSMUkHVU	ILMN_2749955	2400003C14RIK	1.04639	0.137369	0.998485	-1.00105	0.969579	0.996149	-1.00528	0.834968	0.998969	1.0315	0.129645	0.660233	-0.303478	0.393978	-0.150228	0.678692	-0.205348	0.569269
Wn_k_gjiP.nxeyz97E	ILMN_1260112	2400003C14RIK	-1.06839	0.253208	0.998485	1.05896	0.212619	0.883043	-1.00775	0.92192	0.998969	1.00297	0.875044	0.985484	-0.576022	0.0813804	0.258362	0.471072	0.130726	0.718874
EKeSskZaoSXSEh9_5A	ILMN_2524776	2400006N03RIK	-1.06014	0.0756426	0.998485	1.00452	0.830976	0.977477	-1.00169	0.940339	0.998969	1.04286	0.0393373	0.496841	0.250742	0.484706	-0.255798	0.475641	0.0963877	0.7911
cqFepk4X_x8gD4DAr4	ILMN_2845980	2410001C21RIK	1.02226	0.772316	0.998485	-1.04313	0.333097	0.896238	1.06129	0.0504033	0.998969	-1.03104	0.269134	0.777817	-0.294708	0.408461	-0.502504	0.138814	-0.207906	0.564359
THq0VETXHn3gmoWpfQ	ILMN_2596259	2410001C21RIK	1.01273	0.812507	0.998485	-1.04563	0.380374	0.899257	-1.01366	0.710027	0.998969	1.03589	0.236928	0.761195	0.176825	0.625063	-0.108003	0.766481	-0.282875	0.428393
HUJLSCHikoo2WI7SJ4	ILMN_2845974	2410001C21RIK	-1.01497	0.666947	0.998485	1.0017	0.962152	0.994812	-1.01012	0.79294	0.998969	1.02462	0.510724	0.900776	0.641223	0.0457067	-0.267066	0.455709	-0.00527932	0.988452
0nkSOlXpQ5I3o.Loqs	ILMN_2965641	2410002F23RIK	-1.03604	0.461976	0.998485	1.04957	0.176793	0.875762	1.0094	0.763181	0.998969	1.03278	0.205741	0.733731	-0.0285746	0.937544	-0.127277	0.726048	0.436466	0.20727
E6Py6KriupJXoH3l9s	ILMN_2629648	2410002F23RIK	-1.05462	0.108013	0.998485	1.00469	0.914046	0.990587	-1.00235	0.942971	0.998969	1.04241	0.239054	0.762482	0.347849	0.324659	-0.146162	0.687013	0.16207	0.676975
9QhURIX3ya3tTJ6IUU	ILMN_2775300	2410002I01RIK	1.0298	0.212212	0.998485	NA	NA	NA	-1.02628	0.13604	0.998969	1.0081	0.652934	0.938141	0.00380242	0.991682	NA	NA	0.168151	0.642395
KExQRG8EhHYiSlKPh4	ILMN_2697092	2410002O22RIK	1.06626	0.129188	0.998485	-1.03033	0.327183	0.895167	-1.02483	0.56627	0.998969	1.02644	0.347598	0.832092	-0.477139	0.16318	0.277655	0.437328	0.212969	0.554692
HGz87wYHDi7ZdCH9R4	ILMN_2639035	2410004B18RIK	-1.02065	0.383948	0.998485	1.00993	0.762937	0.969558	-1.05742	0.163181	0.998969	-1.01449	0.537466	0.905487	0.29254	0.41208	0.585208	0.0755267	-0.0376791	0.923332
cXQoESQsOjlF5VJPOo	ILMN_1230931	2410015M20RIK	-1.10875	0.278735	0.998485	1.02267	0.695431	0.957376	1.00172	0.95477	0.998969	1.00065	0.988727	0.998269	0.287153	0.421135	-0.598365	0.0676298	0.28508	0.424645
WoC9ukguleFXtf0iRQ	ILMN_2972325	2410016O06RIK	-1.01687	0.667127	0.998485	1.00819	0.811224	0.976557	-1.00267	0.924854	0.998969	-1.01097	0.591436	0.922617	0.5023	0.139001	-0.00156142	0.996584	0.273011	0.445346
H_RmHkWg.WSiYizc_o	ILMN_2758896	2410019G02RIK	-1.03306	0.284375	0.998485	-1.00592	0.860583	0.981107	-1.02722	0.143872	0.998969	1.00835	0.708574	0.954815	0.600749	0.0662594	-0.187139	0.60467	0.138393	0.702997
Z_kU1F1HTFEcdQjrfY	ILMN_1234516	2410022L05RIK	-1.13892	0.094059	0.998485	-1.13738	0.124695	0.865421	1.02025	0.557929	0.998969	1.01255	0.670485	0.942462	0.358865	0.308508	0.0827042	0.820317	0.257929	0.471841
ip_5KU3F4A.GUYS2hM	ILMN_1255301	2410042D21RIK	1.00032	0.988542	0.998485	NA	NA	NA	-1.0161	0.396383	0.998969	1.00825	0.646335	0.937426	-0.0482288	0.894745	NA	NA	-0.359481	0.307618
NJeS.0e3z4FP6kr47o	ILMN_2982985	2410042D21RIK	-1.05631	0.171599	0.998485	-1.00049	0.991127	0.999107	-1.00687	0.780063	0.998969	-1.00627	0.832437	0.979976	-0.0320837	0.929889	0.504502	0.136996	0.470248	0.170213
lkIz3eOUe4hX1Gbt0o	ILMN_1244801	2410066E13RIK	NA	NA	NA	NA	NA	NA	NA	NA	NA	1.01352	0.515006	0.900776	NA	NA	NA	NA	NA	NA
3rVPoiIZ4NXrsTgK7Q	ILMN_2598520	2410091C18RIK	1.07695	0.0501899	0.998485	-1.03287	0.47817	0.915974	1.03861	0.232618	0.998969	1.04055	0.0365983	0.486845	0.349206	0.322646	-0.659025	0.0382111	-0.473506	0.166865
cwgiuu9ituiteoiqlw	ILMN_2676716	2500003M10RIK	-1.02159	0.478982	0.998485	-1.01784	0.403117	0.905432	1.02664	0.275308	0.998969	-1.0131	0.532153	0.904552	0.216261	0.54844	-0.216708	0.547594	0.0863753	0.825128
3dO55254LkvF9R8Hp8	ILMN_1228394	2500003M10RIK	1.05576	0.0402685	0.998485	1.00949	0.71118	0.961393	-1.03124	0.293034	0.998969	1.00547	0.812744	0.975847	-0.155614	0.667718	0.706006	0.0225062	-0.293226	0.410933
6p07nnbnguS8X1Hwek	ILMN_2858173	2500003M10RIK	1.02397	0.483844	0.998485	-1.02652	0.250758	0.883779	1.02344	0.488151	0.998969	1.00486	0.875788	0.985484	-0.509618	0.132408	0.295996	0.406318	-0.0141199	0.969119
3Sx_8j9McoEEerLsXo	ILMN_1255236	2510003E04RIK	1.05027	0.466803	0.998485	-1.02126	0.81287	0.976557	1.02121	0.864173	0.998969	-1.07546	0.0752971	0.586444	-0.535334	0.110789	0.189295	0.600439	0.159891	0.659043
upd3Td0jTtzdKpRDCA	ILMN_1249344	2510006D16RIK	-1.017	0.801707	0.998485	1.06597	0.195795	0.875854	1.01781	0.667753	0.998969	-1.0234	0.296692	0.799796	0.446788	0.195492	0.0695194	0.848659	-0.69824	0.0247209
WG6vCnt7X_Sy0Xnuco	ILMN_3052390	2510009E07RIK	1.01875	0.701054	0.998485	1.02429	0.539034	0.930763	1.01676	0.6888	0.998969	-1.01917	0.538491	0.905487	-0.614914	0.0584908	-0.323901	0.361239	-0.18789	0.603196
0fuSEFqH_U95n1OahY	ILMN_1255323	2510012J08RIK	1.02276	0.551379	0.998485	-1.016	0.57417	0.936104	1.03477	0.145166	0.998969	-1.03619	0.124486	0.65056	0.286684	0.421929	-0.498537	0.171926	0.354071	0.349862
lqukgK379TofvQWqBU	ILMN_2974280	2510012J08RIK	-1.04444	0.2677	0.998485	1.03211	0.289648	0.891024	1.0027	0.952733	0.998969	-1.05146	0.173013	0.705012	-0.500906	0.140279	0.0432367	0.905596	0.297838	0.403263
K0sBAVMqJMfgniZFXU	ILMN_2719924	2510039O18RIK	-1.01946	0.541565	0.998485	1.01467	0.570833	0.935668	1.01502	0.472571	0.998969	1.01784	0.37647	0.846672	-0.0174557	0.961827	-0.371228	0.290899	0.100101	0.783209
cS4_qoSSlKj_zqh_LA	ILMN_2594165	2510040D07RIK	-1.0183	0.482843	0.998485	NA	NA	NA	NA	NA	NA	-1.02688	0.269678	0.777817	0.0620235	0.864844	NA	NA	NA	NA
xrl_ezdfQFxEWE_juk	ILMN_2736360	2610002J02RIK	-1.00356	0.945862	0.998485	-1.04891	0.167673	0.869529	-1.07204	0.0122197	0.998969	1.03772	0.132688	0.664191	0.283684	0.427017	-0.21666	0.547685	-0.0701562	0.847286
Tt9uNC7B8DB659711E	ILMN_2630362	2610002M06RIK	-1.01189	0.627929	0.998485	-1.00806	0.786339	0.97304	-1.00388	0.852581	0.998969	1.01218	0.585918	0.919131	-0.0252503	0.9448	0.122303	0.736429	-0.389093	0.266434
EVCAi7C6EQnuXkTJ7k	ILMN_1225027	2610016F04RIK	1.00336	0.923222	0.998485	1.02617	0.425883	0.909988	-1.00228	0.93616	0.998969	-1.01351	0.524511	0.902691	0.531789	0.113626	0.426171	0.219415	0.144253	0.690932
3EXgqHneHtRVXt_UzM	ILMN_2599935	2610024G14RIK	-1.00234	0.930589	0.998485	-1.01127	0.682176	0.957087	1.03858	0.143496	0.998969	1.0222	0.339536	0.82884	0.530505	0.114666	-0.308365	0.386016	0.141849	0.695873
0gl1tXrkQXggkSOLik	ILMN_2835461	2610024G14RIK	1.01869	0.727262	0.998485	1.02635	0.392066	0.901856	-1.01657	0.491166	0.998969	1.01197	0.611762	0.929414	-0.510862	0.131306	-0.547124	0.101671	-0.565992	0.112156
0F4Kh53h7UVV7flMzY	ILMN_1258552	2610024G14RIK	-1.0562	0.0339619	0.998485	1.00529	0.850086	0.980313	-1.00049	0.988301	0.998969	-1.01651	0.534524	0.905258	-0.290515	0.448228	-0.171295	0.636095	0.315638	0.374315
lKfqBBJAse6UJopqT4	ILMN_2750842	2610027L16RIK	1.03075	0.185355	0.998485	1.04943	0.172254	0.871245	-1.00902	0.562175	0.998969	1.0319	0.114095	0.635366	0.37127	0.29084	-0.073762	0.839521	0.29933	0.433924
xHGofx5h6PvVKnEeCI	ILMN_1257485	2610029G23RIK	-1.02565	0.612442	0.998485	-1.05415	0.294833	0.891024	1.03573	0.277255	0.998969	1.02925	0.23855	0.761507	0.49732	0.1436	0.275918	0.440318	0.123063	0.734841
Qn_Ai_iLV_z9MclKe8	ILMN_2834344	2610029G23RIK	-1.02386	0.281901	0.998485	NA	NA	NA	NA	NA	NA	-1.01302	0.422049	0.869399	-0.202944	0.573897	NA	NA	NA	NA
K6fVehQlPSi9OLYXcg	ILMN_2980212	2610034M16RIK	1.01292	0.781063	0.998485	1.03819	0.409732	0.905432	1.00586	0.804026	0.998969	1.01054	0.61812	0.930567	0.521769	0.121894	0.0691609	0.849432	-0.382201	0.275734
ZiFVP_e7nH058CLeik	ILMN_2913326	2610039C10RIK	1.01068	0.748681	0.998485	1.09632	0.0439536	0.865421	1.0252	0.353197	0.998969	-1.00726	0.695568	0.950384	0.163882	0.650982	-0.0932673	0.797743	-0.433104	0.211192
3koBCVK0f37PL3Th.o	ILMN_1260441	2610044O15RIK	-1.01298	0.650692	0.998485	1.01735	0.634213	0.949555	1.01831	0.660796	0.998969	-1.04542	0.133364	0.664813	0.427843	0.250651	0.00418261	0.990851	-0.012362	0.972962
QuHyETDEjt9VX.sn_E	ILMN_1252490	2610101N10RIK	-1.02613	0.503194	0.998485	-1.03901	0.328584	0.895167	1.01587	0.636281	0.998969	-1.02627	0.538871	0.905487	-0.11675	0.748063	0.141799	0.695977	-0.553901	0.0966526
cXp0TjsojVJHED8xfo	ILMN_2719131	2610101N10RIK	NA	NA	NA	NA	NA	NA	1.00198	0.921563	0.998969	1.04614	0.0280828	0.450011	NA	NA	NA	NA	0.533937	0.111901
Nu7hHqR3gKCxP8lSM4	ILMN_2731228	2610301B20RIK	1.00279	0.927953	0.998485	-1.00883	0.73293	0.964881	1.00204	0.918834	0.998969	1.02205	0.35469	0.835292	-0.0891555	0.819573	-0.0991125	0.785309	0.473789	0.166577
iKe7T7Np5QJ0vnkuUE	ILMN_3086201	2610507B11RIK	1.07562	0.129708	0.998485	-1.02173	0.361405	0.899257	-1.00557	0.788806	0.998969	1.02414	0.212553	0.736899	-0.366127	0.298098	-0.397096	0.255853	0.00197636	0.995677
uhUqPu1CXLNed.apBI	ILMN_3014965	2610507B11RIK	1.11187	0.0822891	0.998485	1.01838	0.69745	0.957598	-1.0083	0.814775	0.998969	-1.06396	0.0342414	0.477472	0.22407	0.533724	0.577488	0.080427	-0.233217	0.516692
oilWJVq_WWiSJa1xis	ILMN_1225123	2610524H06RIK	-1.03756	0.332304	0.998485	-1.00453	0.897586	0.985291	1.03436	0.206584	0.998969	-1.04182	0.0623398	0.555698	0.41092	0.238135	-0.641742	0.0454757	-0.0272358	0.940466
HkJHSwfHUWw07wtTRU	ILMN_1233531	2610528E23RIK	-1.03548	0.367302	0.998485	-1.01073	0.604185	0.943798	1.0668	0.0104615	0.998969	-1.01757	0.490826	0.895877	0.444989	0.197516	-0.639211	0.0466114	0.236942	0.509822
ohd5KfZFEl.0Z6kE5M	ILMN_3140158	2700007P21RIK	1.05018	0.241787	0.998485	1.04472	0.245265	0.883779	-1.04041	0.217846	0.998969	-1.00879	0.764692	0.964676	0.154401	0.670185	-0.234925	0.513536	-0.248396	0.488937
fmTSbcfcLhEAu1X9Qk	ILMN_2672606	2700050L05RIK	1.02162	0.587172	0.998485	-1.01058	0.677822	0.957087	-1.01787	0.539418	0.998969	-1.01017	0.675871	0.945874	-0.491599	0.148996	-0.072347	0.842567	0.202554	0.574648
cogVSiPhzvciPxRZ58	ILMN_1225213	2700060E02RIK	-1.04017	0.432151	0.998485	-1.03116	0.439734	0.913041	1.02562	0.31364	0.998969	-1.0336	0.293402	0.797621	-0.105511	0.771746	-0.90335	0.000339234	-0.484981	0.155392
fRX0ue6guXTwFCXXaU	ILMN_2847285	2700062C07RIK	1.01247	0.785149	0.998485	1.02187	0.508599	0.920144	1.05266	0.205637	0.998969	-1.01265	0.605975	0.928639	0.089505	0.805769	-0.10269	0.77772	0.0827055	0.820314
6J6H0pH3zfdzgiDpd4	ILMN_1245380	2700062C07RIK	-1.00369	0.934565	0.998485	-1.00028	0.99367	0.999326	1.02896	0.397684	0.998969	-1.03036	0.3262	0.818941	0.323818	0.361368	-0.630755	0.0505433	-0.23838	0.50718
up.gKJF_4iu3VXzqn4	ILMN_2725493	2700078K21RIK	-1.03095	0.329517	0.998485	-1.0459	0.296401	0.891024	1.04478	0.154262	0.998969	1.00405	0.880518	0.985741	0.305168	0.391216	0.455708	0.185637	0.251255	0.483782
frgvX0_.7w4zn5zzhU	ILMN_1214482	2700081O15RIK	1.00311	0.895517	0.998485	NA	NA	NA	NA	NA	NA	NA	NA	NA	-0.355237	0.313779	NA	NA	NA	NA
o9dFILjr0vuKSV1JCE	ILMN_3088934	2700094K13RIK	-1.14984	0.0874209	0.998485	-1.08689	0.0860639	0.865421	1.04315	0.132284	0.998969	1.00834	0.731973	0.957813	0.428346	0.216815	-0.590259	0.0724279	-0.0254059	0.94446
9hbuUsHL3u4c5M5LLY	ILMN_1252210	2700097O09RIK	-1.03005	0.414612	0.998485	1.03947	0.343048	0.898965	-1.04722	0.292212	0.998969	1.10442	0.00453695	0.268381	0.135158	0.709683	0.120912	0.739339	-0.380107	0.278594
T1fqW5_Xp0p10sZ7Oc	ILMN_1217827	2810002N01RIK	-1.04606	0.573435	0.998485	1.0252	0.616475	0.946042	1.07857	0.0111149	0.998969	-1.00674	0.80176	0.973378	0.0418611	0.908589	-0.60753	0.062461	0.188312	0.602366
0d9SrJwOC1e0nUiKJI	ILMN_2994063	2810004N23RIK	1.04528	0.0713825	0.998485	1.00172	0.948471	0.994451	1.02274	0.224319	0.998969	1.01794	0.397012	0.855605	0.247309	0.490902	-0.0815807	0.822725	-0.0911048	0.802354
WiwTnsiUkuSOX7nrhE	ILMN_2950721	2810008M24RIK	1.0766	0.178864	0.998485	1.01398	0.63922	0.949657	-1.01657	0.561738	0.998969	-1.00743	0.824252	0.977831	-0.179765	0.619226	0.230926	0.520937	0.300237	0.399301
xneXLdO7AqvDIqO87o	ILMN_1253355	2810021B07RIK	1.01375	0.752272	0.998485	-1.01544	0.503443	0.919647	-1.01728	0.426797	0.998969	-1.01227	0.633508	0.935148	-0.627074	0.0523219	0.574187	0.0825836	-0.138906	0.701938
o6t86i.wT_04tP31aU	ILMN_2674668	2810021J22RIK	-1.00799	0.734841	0.998485	-1.0332	0.167896	0.869529	1.00188	0.922339	0.998969	1.02548	0.291855	0.797333	-0.628233	0.0517573	0.0120427	0.97366	0.240339	0.503588
rghu57e7uS7mcoVues	ILMN_2798674	2810046L04RIK	-1.07972	0.237078	0.998485	1.01741	0.480716	0.915989	-1.00382	0.91474	0.998969	1.05944	0.052313	0.527888	0.354185	0.315317	0.4432	0.199541	0.329846	0.351973
fh6D5B_1..fpPmr.lA	ILMN_1227212	2810403A07RIK	1.0203	0.604016	0.998485	1.07306	0.0630324	0.865421	-1.07182	0.044909	0.998969	1.02084	0.537614	0.905487	-0.00780097	0.982936	-0.141615	0.696356	-0.190192	0.598682
irHvkfTUgtVq4c71Uo	ILMN_1238542	2810405K02RIK	-1.05563	0.467633	0.998485	-1.10328	0.151366	0.868191	1.02473	0.61663	0.998969	-1.05492	0.108069	0.62635	0.541505	0.105955	-0.462754	0.178063	0.286872	0.42161
69QKHUu6.UkVJ4qFS4	ILMN_2851455	2810408M09RIK	-1.01478	0.666865	0.998485	1.00271	0.918882	0.991608	1.01984	0.47242	0.998969	1.01993	0.347952	0.832136	0.727802	0.0170273	-0.228183	0.526038	0.249779	0.486441
lAT10pzwsoulq596Uk	ILMN_2625188	2810422O20RIK	1.02261	0.383764	0.998485	1.036	0.0857804	0.865421	1.00744	0.715695	0.998969	1.05432	0.0156747	0.387024	0.375719	0.284639	-0.195383	0.588546	-0.0763125	0.84529
ZjqhFKLtIEoV4AvkUk	ILMN_2749143	2810428I15RIK	-1.12027	0.232893	0.998485	1.01805	0.661077	0.953909	-1.00562	0.854278	0.998969	-1.03804	0.207296	0.73402	0.48819	0.15227	-0.356067	0.312569	0.342749	0.332282
3oRWteCN55l4e93IXg	ILMN_2974601	2810432D09RIK	-1.09023	0.211766	0.998485	1.02966	0.502875	0.919326	1.02525	0.426796	0.998969	1.03127	0.202853	0.730075	0.336572	0.341636	-0.689964	0.0272404	0.330253	0.385402
Wqh8qbun9B4Msnv4lQ	ILMN_2658135	2810432L12RIK	1.00571	0.894502	0.998485	-1.03382	0.252963	0.883779	-1.02045	0.464694	0.998969	-1.01274	0.580434	0.917535	-0.547506	0.101384	0.229738	0.523143	-0.10353	0.77594
xI960ejXeiei_SkvuA	ILMN_2695228	2810453I06RIK	1.00752	0.770284	0.998485	-1.02962	0.176589	0.875762	-1.01915	0.432631	0.998969	1.00644	0.740864	0.95988	0.237376	0.509024	-0.500706	0.140463	0.101314	0.780636
ceCf15YSBEhJAYJDgk	ILMN_1224076	2810453I06RIK	1.03906	0.311913	0.998485	-1.04771	0.313761	0.893519	-1.03238	0.578194	0.998969	1.03998	0.209717	0.73567	-0.0404968	0.911558	0.191281	0.596549	0.0523546	0.885788
cRudNRGQgZSNC7WC7g	ILMN_2524723	2810470D21RIK	1.06152	0.0282599	0.998485	1.01047	0.679733	0.957087	1.01677	0.335113	0.998969	-1.03085	0.226469	0.751436	-0.318214	0.370214	0.328911	0.353421	0.0098577	0.978438
HRUkJlLNIdQyDrtFY4	ILMN_2948800	2900006K08RIK	1.02827	0.132032	0.998485	1.01498	0.478263	0.915974	1.00261	0.903659	0.998969	-1.01487	0.397547	0.856054	-0.138149	0.703501	0.3385	0.338702	0.204915	0.570101
fzr.SP8AjnIJXUC.qs	ILMN_2733835	2900010J23RIK	-1.03019	0.256039	0.998485	NA	NA	NA	NA	NA	NA	NA	NA	NA	-0.24771	0.490178	NA	NA	NA	NA
Thbqt4x00MAeXr91RU	ILMN_2877367	2900010M23RIK	-1.07322	0.383379	0.998485	1.01707	0.648342	0.951127	-1.00285	0.932104	0.998969	1.05156	0.207787	0.734109	0.114494	0.752802	-0.417617	0.229807	-0.0949567	0.808003
roK0R56VBER4Sgl4VA	ILMN_2636325	2900011O08RIK	1.00357	0.910169	0.998485	-1.02104	0.493924	0.919149	1.04595	0.199609	0.998969	1.02848	0.152782	0.682376	0.249779	0.48644	0.232512	0.517996	-0.0890608	0.806717
ijUSHrEgiIfXro45Yo	ILMN_1217298	2900011O08RIK	1.1775	0.0588682	0.998485	-1.00394	0.944206	0.994451	1.0094	0.871773	0.998969	1.04644	0.199284	0.730043	-0.310233	0.382995	-0.176456	0.625799	-0.630682	0.0505783
HX7K1E_Dlv98zfcq7s	ILMN_2609182	2900062L11RIK	1.015	0.7776	0.998485	-1.03637	0.667806	0.955862	-1.01663	0.68386	0.998969	1.0517	0.215562	0.739621	-0.230403	0.521907	0.41822	0.229065	-0.248736	0.488323
HgAVJ.TX_zitDPDtHg	ILMN_2755059	2900064A13RIK	-1.01474	0.83805	0.998485	-1.03468	0.617561	0.946456	1.01022	0.928649	0.998969	-1.06716	0.0583262	0.547039	-0.291671	0.413533	-0.0228537	0.950034	0.0576545	0.874299
uqFSCnUV_QeRBd.EFo	ILMN_1247302	3010026O09RIK	-1.03042	0.549564	0.998485	-1.0673	0.0412059	0.865421	-1.01817	0.498695	0.998969	-1.06037	0.0247337	0.447541	0.0266539	0.941736	0.0517045	0.887198	0.355652	0.313174
EVfoJATr3e37UqK87k	ILMN_2971131	3110001D03RIK	-1.15242	0.107532	0.998485	1.02678	0.449479	0.913041	-1.04348	0.0797535	0.998969	1.0331	0.287949	0.795037	0.350112	0.321307	-0.609949	0.0611416	0.0893915	0.806011
NPWff4EmgUmXmKgVwc	ILMN_2747331	3110002H16RIK	1.00478	0.882768	0.998485	-1.04505	0.370075	0.899257	-1.04144	0.166432	0.998969	1.01002	0.759371	0.96317	-0.0685924	0.850658	0.0832282	0.819194	0.115028	0.75168
EU3bXrgJp5oX_9RC.4	ILMN_1235047	3110009E18RIK	-1.07994	0.141835	0.998485	1.02243	0.502921	0.919326	-1.01037	0.646437	0.998969	1.01331	0.554237	0.910418	0.294482	0.408837	-0.0796828	0.826796	-0.260037	0.468097
6nejAeATprC0BUh9Sk	ILMN_2846297	3110035E14RIK	-1.0233	0.717466	0.998485	1.29564	0.28377	0.891024	1.09897	0.169404	0.998969	-1.03685	0.528223	0.903357	-0.251334	0.483641	0.164418	0.649903	0.269394	0.451638
6dZK76RCRi.ge.qzSk	ILMN_1252821	3110035E14RIK	1.06089	0.381253	0.998485	1.42637	0.235564	0.883779	1.03898	0.503298	0.998969	-1.05218	0.158951	0.689467	-0.0686894	0.850449	0.06588	0.856511	-0.100919	0.781473
ZpdxB1IorfogngBIJ4	ILMN_1255496	3110040N11RIK	-1.07765	0.167623	0.998485	-1.02131	0.482106	0.916628	1.01928	0.455193	0.998969	1.02303	0.37047	0.84373	0.425596	0.220105	-0.294814	0.408284	-0.364015	0.301107
NVBOg6dUHl7B1L9CoU	ILMN_2882050	3110040N11RIK	-1.00232	0.925982	0.998485	NA	NA	NA	NA	NA	NA	NA	NA	NA	0.732977	0.0158778	NA	NA	NA	NA
EPq7UJLX9F36stornU	ILMN_1259299	3110056O03RIK	1.01112	0.862462	0.998485	1.06256	0.199217	0.875854	-1.01467	0.624928	0.998969	1.01531	0.581926	0.918689	-0.639563	0.0464524	-0.0417805	0.908764	0.171649	0.635387
0XI6Ef791TpUc7l6zQ	ILMN_2635871	3110057O12RIK	-1.05863	0.136068	0.998485	1.05931	0.133473	0.865421	-1.06523	0.408884	0.998969	-1.05969	0.304149	0.802678	0.351788	0.318835	0.126233	0.728223	-0.115793	0.750073
0YdJXAhXggsvey8h9M	ILMN_1259606	3110057O12RIK	-1.0293	0.409881	0.998485	-1.00698	0.861269	0.981107	-1.03162	0.466529	0.998969	-1.01531	0.467656	0.888147	-0.392	0.262563	0.643659	0.0446275	0.0488312	0.893436
BinB.LisvqGNMjoelQ	ILMN_2696066	3110070M22RIK	1.01981	0.483472	0.998485	NA	NA	NA	NA	NA	NA	-1.03798	0.0970528	0.608755	0.102583	0.777947	NA	NA	NA	NA
ErqodcTPY3q5T5Lkl4	ILMN_2767057	3110082I17RIK	-1.04518	0.218925	0.998485	1.01588	0.666538	0.955814	1.00136	0.958549	0.998969	1.02867	0.243669	0.764484	0.710885	0.0211874	0.0247695	0.94585	-0.580851	0.0782679
ue4d9cekQ6l8Q5I6tU	ILMN_2524189	3200001I04RIK	1.05082	0.310084	0.998485	1.07913	0.0811535	0.865421	-1.0339	0.161419	0.998969	-1.05832	0.0431028	0.5012	0.0256758	0.943871	-0.0403666	0.911842	0.504793	0.136733
3fpmOKAeKVIivC7PpQ	ILMN_2711401	3200002M19RIK	1.00438	0.860069	0.998485	NA	NA	NA	1.00395	0.826177	0.998969	1.00332	0.846815	0.98412	0.295986	0.406334	NA	NA	0.2269	0.52843
oPE5K3u7N_TwP9SXfs	ILMN_2753589	3632451O06RIK	-1.00558	0.893876	0.998485	-1.1897	0.0245863	0.865421	-1.0468	0.13044	0.998969	-1.04101	0.251311	0.77025	-0.647679	0.042884	0.117201	0.747116	0.518197	0.124928
iqdSU5L4.JKgOSv3SQ	ILMN_3154231	3830406C13RIK	-1.02909	0.494228	0.998485	-1.0634	0.0978465	0.865421	-1.02015	0.432679	0.998969	-1.02987	0.300647	0.800909	-0.32931	0.352802	0.54073	0.106555	0.432484	0.21192
NshKBGKCp3.wE1LdUk	ILMN_2683277	3830406C13RIK	-1.00437	0.889974	0.998485	-1.05414	0.094731	0.865421	1.01586	0.541851	0.998969	-1.05281	0.0692276	0.571938	-0.490617	0.149935	0.145822	0.687711	0.219179	0.542923
ZSgRigqd.8BNS3VJM4	ILMN_2683283	3830406C13RIK	-1.01436	0.654982	0.998485	-1.04793	0.211433	0.882971	1.01623	0.551602	0.998969	-1.02478	0.456381	0.884316	-0.446391	0.195939	0.34136	0.334373	-0.253876	0.479077
Q2t.7lQrCD748D3t6o	ILMN_2719487	4430402I18RIK	1.00876	0.633332	0.998485	NA	NA	NA	NA	NA	NA	NA	NA	NA	0.34866	0.323455	NA	NA	NA	NA
WpGP_DXd5.vH27.Avo	ILMN_2629897	4632404H12RIK	-1.02202	0.520365	0.998485	-1.0152	0.678078	0.957087	-1.0184	0.435243	0.998969	1.00268	0.89271	0.987181	-0.724997	0.017674	0.0595965	0.870095	0.464068	0.176672
T7O3rqfqoPQqKlwCR8	ILMN_2711532	4632407F12RIK	-1.01719	0.453769	0.998485	NA	NA	NA	-1.01618	0.375697	0.998969	NA	NA	NA	0.508519	0.133385	NA	NA	-0.132977	0.714203
lorh6LeyFO9dq1TdAU	ILMN_2815545	4632411B12RIK	1.04042	0.425173	0.998485	-1.01216	0.74759	0.967209	-1.0539	0.0258849	0.998969	1.01256	0.537754	0.905487	-0.589601	0.0728267	0.652306	0.0409346	0.368088	0.295319
ofxo3nEL.HfkzEv5U4	ILMN_2647427	4632415K11RIK	1.03751	0.161588	0.998485	-1.00269	0.904701	0.987166	-1.00367	0.859111	0.998969	NA	NA	NA	0.038237	0.916479	0.0645289	0.859429	0.164305	0.650129
0rV93TPQlIET_rPXiE	ILMN_2668536	4732418C07RIK	-1.01084	0.779347	0.998485	-1.0181	0.753158	0.96795	1.03626	0.420055	0.998969	-1.05759	0.0808212	0.590477	-0.179277	0.644421	-0.108668	0.765076	0.376941	0.282949
ungr.h7jqdEfMOlz4s	ILMN_2828512	4732418C07RIK	-1.02816	0.299303	0.998485	-1.02677	0.48125	0.916081	-1.01386	0.625334	0.998969	-1.00926	0.758489	0.962769	-0.14468	0.710353	0.164326	0.650087	-0.341718	0.333833
BtRfnsiuMSCHujiRKE	ILMN_2712675	4732418C07RIK	1.04937	0.165478	0.998485	1.00904	0.66038	0.953909	-1.00491	0.844694	0.998969	-1.03117	0.104106	0.622341	0.0343801	0.924882	0.122403	0.736218	-0.207497	0.565143
NupKUoSt4yiSNFPZ4Q	ILMN_2692060	4732418C07RIK	1.06602	0.0066145	0.916351	NA	NA	NA	NA	NA	NA	-1.009	0.653554	0.938141	-0.664647	0.0360284	NA	NA	NA	NA
ufeRDU0u8R60Ix4aVk	ILMN_2599392	4732471D19RIK	-1.00451	0.901798	0.998485	1.04218	0.29997	0.891024	-1.00866	0.718377	0.998969	-1.02278	0.247419	0.766657	0.230999	0.5208	0.552731	0.0975078	-0.00290091	0.993654
umg4_5IHh9H_Pu.500	ILMN_1223318	4833420G17RIK	-1.01298	0.767712	0.998485	1.06498	0.243236	0.883779	-1.02722	0.667407	0.998969	-1.06284	0.159923	0.689979	-0.806344	0.00483551	0.556852	0.0945179	0.268272	0.453597
ZWMiHdP.Peff6pUrQY	ILMN_2780022	4833424O15RIK	1.02876	0.698033	0.998485	1.16987	0.0720781	0.865421	-1.033	0.468375	0.998969	-1.0017	0.964234	0.997417	0.279273	0.434549	0.311514	0.380929	0.51179	0.130489
iIriX3_Mi.tz2H3B6k	ILMN_2679157	4833424O15RIK	-1.04079	0.5378	0.998485	1.16413	0.102263	0.865421	1.01662	0.799354	0.998969	-1.00419	0.906363	0.989293	-0.0192196	0.957973	0.288289	0.419218	-0.314876	0.375534
B6o0UUSVJ0L39368tQ	ILMN_2664670	4833439L19RIK	1.10697	0.0160714	0.986074	-1.04451	0.267251	0.887169	1.08802	0.0211949	0.998969	1.02343	0.546257	0.907926	-0.165572	0.647579	-0.257841	0.471998	-0.343377	0.331338
3nqPgruRJRFJ8K.7wI	ILMN_2943685	4833439L19RIK	1.05775	0.172171	0.998485	1.0057	0.874556	0.982265	-1.00977	0.633336	0.998969	-1.00401	0.866543	0.984632	-0.54067	0.106601	-0.137263	0.705332	-0.299582	0.400381
BXvrdgR0Ezj52NH8jI	ILMN_2724226	4833439L19RIK	1.07262	0.397368	0.998485	-1.05938	0.417565	0.907144	1.00456	0.957055	0.998969	1.0819	0.0817019	0.591108	-0.579508	0.0791258	-0.144735	0.689941	0.115246	0.751222
6iAqV6RIoisI6JM6t4	ILMN_1218703	4930402H24RIK	1.09765	0.252211	0.998485	-1.06109	0.102092	0.865421	-1.06125	0.0201991	0.998969	-1.03838	0.165724	0.696701	0.419179	0.22789	0.62092	0.0553871	-0.234004	0.515237
iR58HDqMuc60aOn38s	ILMN_2711651	4930403O06RIK	-1.00146	0.986721	0.998485	-1.05653	0.269477	0.887961	1.02026	0.398829	0.998969	1.01339	0.727714	0.957615	0.224977	0.532025	0.434825	0.209178	-0.233762	0.515684
xdU5BKvl4n8KC0XhIk	ILMN_2672745	4930432K21RIK	1.02846	0.229591	0.998485	1.00568	0.8043	0.975633	1.00316	0.876848	0.998969	-1.0377	0.0906105	0.604039	0.175831	0.627043	-0.264136	0.460854	0.191377	0.596362
HUp.8eR1xCp71idE9Q	ILMN_2595651	4930438O05RIK	1.04945	0.0569644	0.998485	1.00978	0.61973	0.946819	-1.03558	0.109594	0.998969	1.03371	0.0652718	0.561989	-0.0341692	0.925342	-0.160757	0.657292	0.0894182	0.805954
r0h33RE.onoAjh.L.U	ILMN_1248719	4930447C04RIK	-1.02491	0.420407	0.998485	NA	NA	NA	NA	NA	NA	NA	NA	NA	-0.263206	0.462494	NA	NA	NA	NA
xf4P73y_9PUtdwt0.Y	ILMN_2752300	4930452B06RIK	-1.00406	0.909351	0.998485	1.0937	0.0411879	0.865421	1.00898	0.849042	0.998969	1.03067	0.176327	0.708759	-0.444612	0.197942	0.313651	0.377495	0.0711633	0.845116
9nkgEEeFNzdwlHljuI	ILMN_2888766	4930453N24RIK	-1.02317	0.670531	0.998485	1.00535	0.839076	0.97843	-1.00542	0.821509	0.998969	-1.01719	0.579002	0.91678	-0.371162	0.290992	-0.490782	0.149777	0.580255	0.0786479
6UjnqKeICgjLuOcl4k	ILMN_2838965	4930455C21RIK	-1.01114	0.793618	0.998485	-1.00766	0.891834	0.984584	-1.00294	0.923132	0.998969	-1.02245	0.425944	0.870002	-0.161967	0.654846	0.299771	0.40007	-0.140492	0.698667
lpVO3abRxI_6iyj_X8	ILMN_2908953	4930455F23RIK	1.02584	0.605751	0.998485	1.0081	0.794008	0.973843	1.03963	0.189891	0.998969	-1.02454	0.370013	0.843357	-0.489838	0.150682	-0.39167	0.263	0.0309286	0.932408
uBJ.f7iqCqd_OJwldI	ILMN_2616180	4930471M23RIK	1.01454	0.49025	0.998485	NA	NA	NA	NA	NA	NA	NA	NA	NA	0.356562	0.311849	NA	NA	NA	NA
ZXrY4xS6iEtFAguCKA	ILMN_1231151	4930503L19RIK	NA	NA	NA	NA	NA	NA	-1.01516	0.329614	0.998969	NA	NA	NA	NA	NA	NA	NA	0.157635	0.663615
ZXPs._Ru5xybqXqiuo	ILMN_2944657	4930506M07RIK	1.00799	0.825975	0.998485	1.02563	0.378001	0.899257	1.05343	0.0570268	0.998969	1.02546	0.360473	0.839696	-0.568377	0.0864687	-0.221123	0.539259	-0.27708	0.438316
ildReiCKDVJBM6F6x4	ILMN_2967843	4930529F22RIK	1.00634	0.811891	0.998485	NA	NA	NA	NA	NA	NA	NA	NA	NA	0.277639	0.437355	NA	NA	NA	NA
fp_.xR4udnUBfoT7d8	ILMN_1238069	4930539E08RIK	1.03437	0.603703	0.998485	1.11911	0.0860428	0.865421	-1.02309	0.272559	0.998969	-1.04688	0.10903	0.628916	-0.45897	0.182107	0.310048	0.383293	0.584156	0.0761825
ZqxEBRJIPSo4fqo3Yo	ILMN_2806907	4930547C10RIK	-1.01298	0.531262	0.998485	-1.00222	0.917038	0.991589	NA	NA	NA	NA	NA	NA	-0.0426288	0.906919	-0.221379	0.538777	NA	NA
odXd6gUReiUiVAn0uM	ILMN_3143304	4930572J05RIK	1.08067	0.499908	0.998485	-1.02888	0.245698	0.883779	1.01915	0.646718	0.998969	-1.01612	0.617665	0.9305	0.531108	0.114177	-0.366155	0.298058	0.249871	0.486275
xHSoS6lN6KtF0ySoJA	ILMN_2704496	4930572J05RIK	1.02423	0.472223	0.998485	1.02379	0.326971	0.895167	-1.00693	0.726876	0.998969	-1.01908	0.394205	0.854817	0.391198	0.297822	-0.0704446	0.846665	0.223419	0.534944
KRnnOfl8ue0KoCeQVs	ILMN_3065373	4930572J05RIK	1.07126	0.541166	0.998485	-1.00515	0.931234	0.993445	-1.00572	0.898904	0.998969	-1.02293	0.455815	0.884316	0.366736	0.297234	-0.188656	0.601691	0.0933884	0.797485
TVDpDCO6tygd.IHCVw	ILMN_2612325	4931406C07RIK	-1.05195	0.145059	0.998485	-1.02972	0.446696	0.913041	-1.01541	0.717351	0.998969	1.00366	0.88562	0.986418	-0.177028	0.648648	0.188809	0.601391	0.148397	0.682437
Hksd0.0y5dXghdF_pQ	ILMN_2601441	4931406P16RIK	-1.08832	0.0790207	0.998485	-1.01369	0.760077	0.969424	-1.02884	0.135529	0.998969	-1.02698	0.247491	0.766657	0.262915	0.494294	0.489369	0.151133	0.164087	0.650568
iqQ63Te9dStPe9SklI	ILMN_2789611	4931440F15RIK	-1.00836	0.855882	0.998485	NA	NA	NA	-1.03708	0.0241253	0.998969	-1.00106	0.965249	0.997417	0.20413	0.571612	NA	NA	-0.131879	0.71648
Hu8ifiFUA7P7jcVeWc	ILMN_2666297	4933403G14RIK	1.01988	0.543293	0.998485	-1.0044	0.846869	0.979775	1.0023	0.900355	0.998969	-1.05338	0.0407573	0.497378	0.234603	0.514132	0.206457	0.567138	0.0232787	0.949105
Kkao5yEowiNqTyIB1c	ILMN_2637804	4933407P14RIK	-1.0106	0.689288	0.998485	-1.01734	0.564054	0.934257	1.0566	0.0242145	0.998969	-1.01862	0.461182	0.885007	0.360621	0.305973	-0.440656	0.202441	-0.0660069	0.856237
ZXSdfyDGRZinlffqEI	ILMN_1253122	4933411G06RIK	-1.12434	0.09181	0.998485	1.01138	0.805168	0.975953	-1.00618	0.866942	0.998969	-1.00526	0.785427	0.968871	0.404859	0.245816	-0.00239127	0.994769	-0.424146	0.22185
EDt7EW0SYOJ0ecOli8	ILMN_2605417	4933411K20RIK	-1.01885	0.662704	0.998485	-1.07033	0.0547742	0.865421	1.00185	0.949525	0.998969	-1.00207	0.949527	0.995822	-0.438005	0.205489	-0.207843	0.564481	-0.00218809	0.995214
QNaJ0d1Ilf5Nn6e06c	ILMN_3033621	4933421E11RIK	-1.09207	0.0711566	0.998485	1.01439	0.577503	0.936521	1.02293	0.190547	0.998969	-1.00121	0.959016	0.996133	0.53115	0.114143	-0.472281	0.16812	-0.278867	0.435245
xVF7So1Uejl4B6I4xQ	ILMN_3082287	4933421E11RIK	1.01458	0.677022	0.998485	1.02444	0.501863	0.919326	-1.02444	0.486171	0.998969	1.02887	0.429699	0.871821	-0.487143	0.153284	0.0247715	0.945846	-0.190026	0.599006
HhVIzANjkLciNW_ibk	ILMN_1252267	4933424B01RIK	1.01915	0.474857	0.998485	1.00588	0.779933	0.972677	1.02922	0.21922	0.998969	1.01021	0.611995	0.929414	-0.254367	0.478198	-0.537259	0.109266	-0.146146	0.687046
KXUBACVfvgGjiEUROg	ILMN_2694356	4933424B01RIK	-1.00962	0.744326	0.998485	-1.00579	0.784328	0.972986	-1.00786	0.686395	0.998969	-1.02551	0.227325	0.752601	0.0143966	0.968514	0.122901	0.735177	-0.0422185	0.907811
NohBIA6gJSWUuCLh_I	ILMN_2833356	4933424B01RIK	1.00387	0.925053	0.998485	1.01135	0.754418	0.96795	-1.00504	0.839461	0.998969	1.02775	0.24395	0.764484	-0.140805	0.698024	0.380278	0.27836	0.837139	0.0025162
l6PlCyoigsvir5Ons0	ILMN_1254551	4933426M11RIK	1.00686	0.885456	0.998485	1.02496	0.380596	0.899257	-1.00641	0.738493	0.998969	1.00406	0.870759	0.985484	0.409511	0.239908	0.0230354	0.949637	-0.0772111	0.843486
QXaAoTQqHTK30t6IvA	ILMN_1245850	4933427D14RIK	-1.00911	0.828865	0.998485	1.03665	0.543481	0.931317	-1.04157	0.156287	0.998969	-1.08057	0.0152127	0.384765	-0.231156	0.520511	0.554669	0.096094	0.563876	0.0895574
o6cIXSzdUskffej_D0	ILMN_2616956	4933434E20RIK	1.01657	0.727207	0.998485	1.01305	0.797688	0.974337	1.02974	0.27642	0.998969	-1.01551	0.64247	0.936381	0.0730997	0.840946	-0.358104	0.30961	-0.10111	0.78107
lXgO0UEENStExeX1LQ	ILMN_1257872	4933434E20RIK	1.04718	0.370745	0.998485	-1.07708	0.211482	0.882971	1.02486	0.430377	0.998969	1.06155	0.0143379	0.381064	-0.215722	0.549461	-0.6054	0.0636385	-0.274253	0.443195
3eVT5HQeDIDP6vyJN0	ILMN_2594807	4933434E20RIK	1.03626	0.334311	0.998485	-1.02633	0.681352	0.957087	1.01239	0.890784	0.998969	1.02084	0.549103	0.909034	-0.0927056	0.79894	0.325329	0.359001	0.105628	0.7715
c4KC6jVM6FDQSXgo7s	ILMN_2749935	5033411D12RIK	1.01929	0.424099	0.998485	NA	NA	NA	NA	NA	NA	NA	NA	NA	-0.38067	0.277824	NA	NA	NA	NA
Qn030XFLOF6nGgd1xI	ILMN_2818396	5033414D02RIK	-1.06696	0.197072	0.998485	1.0362	0.157713	0.869529	-1.0097	0.7288	0.998969	1.04929	0.027183	0.450011	0.292224	0.412608	-0.791423	0.00638248	0.0122952	0.973108
rpLv3e_FKut6DkiN5c	ILMN_3122081	5133401N09RIK	-1.04598	0.436917	0.998485	-1.07661	0.257045	0.884665	1.02336	0.368953	0.998969	1.0299	0.318017	0.814172	0.0846021	0.816252	-0.385426	0.27136	-0.0137667	0.969891
QIbfSilSE6E7iK5W14	ILMN_3160472	5330417C22RIK	-1.00545	0.84275	0.998485	1.0663	0.0240921	0.865421	1.02519	0.259609	0.998969	1.00489	0.802211	0.973515	-0.254491	0.477976	-0.271453	0.448052	-0.0164634	0.963996
WS4lebX0iOBHuVW0RM	ILMN_2882088	5430435G22RIK	NA	NA	NA	NA	NA	NA	NA	NA	NA	1.00892	0.585445	0.919087	NA	NA	NA	NA	NA	NA
c56KKGKKeiCKCUe7gc	ILMN_2801798	5430437P03RIK	-1.06097	0.263799	0.998485	-1.05435	0.160675	0.869529	-1.0039	0.934942	0.998969	-1.00787	0.740874	0.95988	0.118984	0.743377	-0.609405	0.0614367	0.00223808	0.995104
uXFHieRFyVa9Ij8_nk	ILMN_2836359	5730409E04RIK	1.01602	0.566375	0.998485	NA	NA	NA	NA	NA	NA	NA	NA	NA	0.498903	0.142128	NA	NA	NA	NA
ZtyCKfp1BKoiHnug7M	ILMN_2889313	5730419I09RIK	1.03279	0.535046	0.998485	1.01613	0.77719	0.972372	1.02168	0.437446	0.998969	-1.01851	0.552341	0.910252	-0.446583	0.195723	0.660903	0.0374724	0.0135859	0.970286
3qvd.OXrui_u40n_S4	ILMN_1218627	5730437N04RIK	-1.13849	0.0246236	0.998485	-1.02056	0.658851	0.953909	1.05312	0.0684744	0.998969	-1.00511	0.826196	0.977831	0.121097	0.73895	-0.711225	0.0210974	0.0202645	0.95569
0pwgEnS66JPxcE5E6U	ILMN_2796798	5730469M10RIK	1.19174	0.00613727	0.896559	-1.04188	0.245243	0.883779	-1.04861	0.194415	0.998969	1.06489	0.111461	0.632215	0.2396	0.504942	0.487734	0.152711	0.396017	0.257265
3exUNfB98ksPIitFdU	ILMN_3163221	5730494M16RIK	-1.09062	0.120724	0.998485	-1.00028	0.990419	0.998819	1.03614	0.19058	0.998969	1.01632	0.552591	0.910252	-0.0635134	0.861623	-0.348756	0.323312	0.395832	0.257508
cd6.dTL_XHEAdK4N7U	ILMN_2663516	5730494N06RIK	-1.0211	0.548519	0.998485	-1.00536	0.888205	0.983904	-1.00063	0.988337	0.998969	1.00667	0.874719	0.985484	-0.31199	0.380162	-0.40947	0.239961	0.0260205	0.943119
3Ukimn0MQsqK8EH_Kk	ILMN_1222594	5730528L13RIK	-1.03792	0.441764	0.998485	1.01659	0.549633	0.931317	1.0199	0.577629	0.998969	-1.01144	0.641834	0.936381	-0.305073	0.391371	-0.300729	0.398491	0.302854	0.395001
Hrnjm4F6G50Lr9c_Xk	ILMN_1237653	5830403L16RIK	NA	NA	NA	NA	NA	NA	NA	NA	NA	-1.04075	0.0381592	0.490215	NA	NA	NA	NA	NA	NA
9gQ00ugiiuSSIloVJI	ILMN_2924591	5830415F09RIK	NA	NA	NA	NA	NA	NA	-1.02381	0.15854	0.998969	NA	NA	NA	NA	NA	NA	NA	0.0966011	0.790646
c2t7sWWgneYoWX.ffQ	ILMN_1223695	5830415F09RIK	1.012	0.532082	0.998485	NA	NA	NA	NA	NA	NA	1.00232	0.894342	0.98725	0.303309	0.394254	NA	NA	NA	NA
otPUwWbuELCEk7jXLE	ILMN_1227266	5830427D03RIK	1.02585	0.527022	0.998485	1.03394	0.388535	0.900418	-1.05574	0.035287	0.998969	1.00408	0.878872	0.985741	-0.455502	0.185862	0.0332056	0.927443	-0.269445	0.451549
BUi2i9r9yr1l2RSgW8	ILMN_2724719	5930416I19RIK	1.01442	0.76607	0.998485	-1.01105	0.79269	0.973843	1.02322	0.480161	0.998969	1.00279	0.909008	0.989769	0.170337	0.638012	-0.324572	0.360186	-0.593648	0.070396
ZUXnXevH6spOh_pS94	ILMN_3070533	5930434B04RIK	1.00142	0.962938	0.998485	1.02875	0.24878	0.883779	-1.03908	0.134889	0.998969	1.01934	0.402246	0.85886	0.334224	0.345227	-0.446219	0.196131	-0.212597	0.555399
Eomu17lN3od9B5tHNQ	ILMN_3149218	5930434B04RIK	1.07002	0.00561649	0.896559	-1.02231	0.455665	0.913041	1.01862	0.5349	0.998969	1.02441	0.168026	0.699362	-0.0719841	0.843348	-0.323115	0.362472	-0.0844695	0.816536
EK6KV0jMpQ.qutLR8I	ILMN_1213573	5930434B04RIK	-1.04415	0.149996	0.998485	1.0271	0.304458	0.891024	-1.00876	0.565825	0.998969	1.01759	0.555619	0.910454	-0.0892181	0.806382	-0.292649	0.411896	0.496305	0.144549
0FgtAdH5d3krmeXByU	ILMN_2958067	6030405A18RIK	-1.06167	0.198376	0.998485	-1.08307	0.155081	0.868191	1.03357	0.361158	0.998969	-1.10466	0.000555957	0.118672	0.575061	0.105253	0.0941108	0.795946	0.17607	0.626566
rFaKtEKBJJHSEs0hCI	ILMN_2599739	6030419C18RIK	-1.24463	0.000282004	0.351681	1.06327	0.165224	0.869529	1.00403	0.936981	0.998969	-1.00198	0.948014	0.995721	0.125695	0.729345	0.124134	0.732603	0.0797219	0.826713
xKv0rQHMgcPffbtLk4	ILMN_1234301	6030458C11RIK	1.04275	0.199054	0.998485	1.03208	0.352031	0.898965	1.01991	0.638354	0.998969	-1.00615	0.723559	0.957615	-0.264188	0.460763	0.177356	0.62401	0.151033	0.67705
E4qf1.nmlTKKHuciD0	ILMN_2594139	6330403K07RIK	1.06437	0.0298426	0.998485	-1.0717	0.146726	0.866502	-1.03384	0.247546	0.998969	1.04124	0.190135	0.719762	-0.0599284	0.869376	-0.303847	0.393375	-0.244626	0.49577
BlXLpN.3tfcAEz1RHE	ILMN_2642517	6330406I15RIK	1.01272	0.841718	0.998485	-1.15763	0.0376161	0.865421	1.07678	0.0372792	0.998969	-1.06918	0.0228549	0.438357	0.0461217	0.899323	-0.0955298	0.792925	0.109617	0.763074
KqVcuk3.e19wATPVEc	ILMN_1213736	6330406I15RIK	1.0185	0.741937	0.998485	-1.11265	0.0672186	0.865421	1.04511	0.206638	0.998969	-1.11585	0.0151412	0.384765	0.0679138	0.852122	-0.240098	0.50403	0.622527	0.0545753
cVSYUC79KwoAuLzSL0	ILMN_1218026	6330407J23RIK	-1.0054	0.836514	0.998485	-1.06448	0.252421	0.883779	1.02103	0.701874	0.998969	-1.00263	0.902641	0.989293	0.151409	0.676282	0.373411	0.287847	-0.38043	0.278151
oqh4Qiwo6IlciHEK_A	ILMN_2592187	6330408A02RIK	-1.01822	0.426273	0.998485	-1.03043	0.105482	0.865421	1.00037	0.985914	0.998969	1.01014	0.639264	0.935929	-0.060928	0.867214	0.250541	0.485067	0.300586	0.398727
NeB_LRTLew1DD.u3V4	ILMN_2704715	6330409N04RIK	1.01396	0.722466	0.998485	-1.06147	0.111742	0.865421	-1.01832	0.681189	0.998969	1.02197	0.543103	0.906458	-0.151415	0.676269	0.135834	0.708285	0.0711603	0.845123
TXlN_3e1RS0UqKIHbk	ILMN_2875169	6330416G13RIK	1.00781	0.712514	0.998485	-1.01115	0.619719	0.946819	1.00265	0.908086	0.998969	1.00856	0.659765	0.939451	-0.659977	0.0530655	0.0167776	0.963309	0.226095	0.529933
TSh1u7NLup10sKCKJ0	ILMN_1228426	6330503K22RIK	1.01749	0.748478	0.998485	-1.03905	0.437581	0.913041	-1.0222	0.514816	0.998969	-1.02568	0.357863	0.839068	-0.195845	0.587646	0.581252	0.0780127	-0.0818932	0.822055
WK1K8QL3XTK6Ar8eS4	ILMN_3006575	6330503K22RIK	1.03759	0.458696	0.998485	-1.00501	0.93636	0.994016	1.00101	0.979151	0.998969	-1.01798	0.585541	0.919087	-0.22984	0.522953	0.491923	0.148688	-0.432521	0.211877
0kr4IgoIX32ivAvLQg	ILMN_2671366	6330577E15RIK	1.07175	0.0298744	0.998485	-1.00527	0.912616	0.990015	1.03061	0.68407	0.998969	-1.01287	0.653079	0.938141	-0.0286676	0.937341	0.00161306	0.996471	0.0197552	0.956802
u13lbwy_Hevg._tNE0	ILMN_2650106	6330578E17RIK	1.12913	0.0526779	0.998485	1.036	0.450106	0.913041	-1.02655	0.467893	0.998969	-1.10403	0.00493056	0.278142	-0.550052	0.0994833	0.327471	0.355659	-0.406862	0.243263
i2pVIdsAhln_NHt1JU	ILMN_2966602	6430411K18RIK	-1.01274	0.859109	0.998485	1.06566	0.227514	0.883779	-1.09273	0.0576686	0.998969	1.06489	0.121928	0.648629	-0.624338	0.0536702	-0.146096	0.687148	0.0252273	0.94485
ErSfoBTLgghJHjhQIg	ILMN_2728255	6430526O11RIK	1.02132	0.333403	0.998485	-1.00675	0.753888	0.96795	-1.02437	0.268506	0.998969	NA	NA	NA	0.291088	0.414511	-0.789608	0.00659205	0.193581	0.592056
oKPk4KH_lqt7Xen0LE	ILMN_2731379	6430527G18RIK	1.06842	0.0355886	0.998485	1.0041	0.869136	0.982106	1.01349	0.561093	0.998969	1.0067	0.73171	0.957813	0.334035	0.345516	-0.514461	0.128153	-0.164367	0.650005
WlysSDwyV8kGHnnruw	ILMN_3109491	6430527G18RIK	-1.00289	0.950848	0.998485	1.16373	0.103392	0.865421	1.00511	0.909491	0.998969	-1.0095	0.804532	0.973825	0.302443	0.395675	0.429196	0.215805	0.18455	0.609767
TOSlTyRE9AX1qnuF9A	ILMN_2599214	6430548M08RIK	-1.02375	0.790202	0.998485	1.03507	0.770979	0.971231	-1.02035	0.778883	0.998969	-1.05601	0.328106	0.820917	0.159241	0.660361	0.612224	0.0599171	0.0608648	0.86735
QTqiK96.355dyecwMY	ILMN_1223546	6430571L13RIK	-1.00883	0.931006	0.998485	-1.02487	0.676356	0.957087	-1.13963	0.0637242	0.998969	1.01053	0.878029	0.985484	0.148967	0.681271	0.459772	0.213065	-0.243423	0.527942
cuulzTe9BqnrurFIJI	ILMN_2893471	6430573F11RIK	1.01728	0.75135	0.998485	1.02467	0.461059	0.913064	-1.02703	0.381064	0.998969	-1.03396	0.20824	0.73431	0.695502	0.0255358	0.0852886	0.814782	-0.240928	0.502512
Z8t6KkP3qV94XHXiSg	ILMN_2621130	6430598A04RIK	-1.18824	0.00220148	0.743719	1.01085	0.750273	0.967728	1.0344	0.204154	0.998969	1.00001	0.999651	0.99993	-0.000570882	0.998751	0.0380964	0.916785	-0.412345	0.23635
cqYOECiJChOh5zebZc	ILMN_2747792	6530418L21RIK	1.01615	0.699352	0.998485	1.0461	0.308335	0.892073	1.0679	0.0436357	0.998969	1.00749	0.78161	0.968649	0.627149	0.052285	-0.354274	0.315187	0.180011	0.61874
xRNxQpEQIDkuBItKoU	ILMN_2688257	6530418L21RIK	1.0339	0.520571	0.998485	1.08238	0.2362	0.883779	1.05918	0.10102	0.998969	-1.01248	0.681436	0.947454	-0.177259	0.624201	-0.293066	0.411199	0.159474	0.681929
fThIdfn7epHsMgriB0	ILMN_2885123	6530418L21RIK	1.09303	0.206742	0.998485	1.07597	0.489963	0.918591	1.03343	0.586191	0.998969	1.0137	0.705779	0.953946	-0.0656543	0.856999	-0.0135907	0.970276	0.219351	0.542598
rXEnVOl3EeP3tBLaX0	ILMN_2706857	6720456B07RIK	-1.00482	0.924999	0.998485	1.10483	0.166319	0.869529	1.07195	0.0371242	0.998969	1.01753	0.436178	0.874061	0.469769	0.170708	-0.482257	0.158071	-0.457052	0.184179
EeonQJSlVL6fgqE.0s	ILMN_2958417	6720456B07RIK	-1.07922	0.102668	0.998485	1.12965	0.0739662	0.865421	-1.00753	0.811774	0.998969	-1.00463	0.887586	0.986418	0.317223	0.37179	-0.392146	0.262369	-0.116877	0.747796
xqT7p5TTRyQJHiRtUc	ILMN_2668886	6720456H20RIK	1.0077	0.74897	0.998485	-1.05693	0.0276137	0.865421	1.02688	0.18155	0.998969	-1.01036	0.638617	0.935929	-0.102862	0.777354	-0.116511	0.765315	0.104759	0.773338
xjrN3vODeFRJld9xV0	ILMN_1245721	6820408C15RIK	NA	NA	NA	NA	NA	NA	NA	NA	NA	1.0035	0.849473	0.984525	NA	NA	NA	NA	NA	NA
fuFF1SPncOKI5qex3o	ILMN_2894211	8430408G22RIK	NA	NA	NA	NA	NA	NA	1.03026	0.139086	0.998969	1.08645	0.0045992	0.269892	NA	NA	NA	NA	-0.116166	0.749289
KjY6eCSiCijiVOlCCU	ILMN_2604263	8430410A17RIK	-1.01975	0.493464	0.998485	1.00083	0.972261	0.996352	-1.03135	0.19567	0.998969	-1.01641	0.355482	0.836001	0.130722	0.718881	-0.261713	0.46513	-0.23509	0.513232
NqSH2Xnj_VEu14_6.M	ILMN_1232530	8430410K20RIK	1.01878	0.745763	0.998485	-1.0165	0.688019	0.957087	-1.01446	0.682976	0.998969	1.01072	0.687217	0.948109	-0.487206	0.153223	0.246246	0.492829	0.172634	0.633417
Es5BR3pVu19XX7In_A	ILMN_1221940	8430419L09RIK	1.09405	0.11926	0.998485	1.07622	0.16451	0.869529	1.03636	0.433161	0.998969	-1.02478	0.42261	0.869399	-0.278351	0.436131	0.0694998	0.848701	-0.21992	0.541525
3p1ISwkwpHxZCS6OkU	ILMN_2910020	8430427H17RIK	-1.00711	0.865688	0.998485	1.02434	0.56753	0.934588	-1.01773	0.384617	0.998969	-1.01908	0.467709	0.888147	0.534283	0.111625	-0.0936878	0.796847	0.301825	0.396688
EiDzhJX1SClChRtEr4	ILMN_1219025	9030409G11RIK	1.0478	0.166069	0.998485	1.07818	0.0602418	0.865421	1.01359	0.544749	0.998969	-1.01693	0.535575	0.905487	-0.371134	0.291031	-0.192011	0.595121	-0.410918	0.238137
uCiwHlPKiyuuJAEKro	ILMN_2724194	9030425E11RIK	1.01021	0.778864	0.998485	1.03263	0.415466	0.906111	-1.03811	0.19873	0.998969	1.00134	0.960666	0.996573	0.548138	0.10091	0.697546	0.0249258	-0.310828	0.382035
We0FzpF6RIhGnuSEQo	ILMN_2872639	9030624J02RIK	1.03184	0.410402	0.998485	1.02978	0.2841	0.891024	-1.04364	0.164882	0.998969	1.04292	0.176475	0.708857	-0.476749	0.163573	0.2758	0.440523	-0.019145	0.958136
ZtJEMpUQfyX5f.Le.w	ILMN_1233304	9130011E15RIK	1.00733	0.810568	0.998485	1.02212	0.386368	0.899627	1.00723	0.739405	0.998969	-1.00288	0.888649	0.986728	-0.55251	0.0976701	-0.209244	0.561799	0.590246	0.0724359
HtfRFZJOXiXFR_XJPs	ILMN_2593484	9130011J15RIK	1.08204	0.11962	0.998485	1.03914	0.437713	0.913041	1.06688	0.0808084	0.998969	1.00845	0.775537	0.967133	-0.635311	0.0483984	-0.241329	0.501778	0.331763	0.349011
N_BF7q_PSK4imS4R3s	ILMN_2607972	9130221H12RIK	1.025	0.337301	0.998485	1.02786	0.215305	0.883043	1.029	0.162	0.998969	-1.00078	0.97061	0.997506	0.0653685	0.857616	0.421711	0.2248	0.472959	0.167425
3oggfih0koD5KgLgoc	ILMN_2754054	9130401M01RIK	1.00561	0.838274	0.998485	NA	NA	NA	NA	NA	NA	NA	NA	NA	0.568901	0.0861137	NA	NA	NA	NA
ZC5EWRfs7RJUuvfK94	ILMN_2633062	9130422G05RIK	-1.07223	0.2156	0.998485	-1.00578	0.898869	0.985521	1.03464	0.311137	0.998969	-1.02935	0.327411	0.820917	-0.194292	0.590671	0.452923	0.188682	-0.472589	0.167804
3e3k5NXwyU.oyWgsi0	ILMN_2692554	9330186A19RIK	-1.00179	0.976482	0.998485	1.01199	0.85065	0.980362	1.03006	0.101628	0.998969	-1.00691	0.808001	0.975089	0.406965	0.243132	0.650569	0.0416591	-0.584216	0.0985513
rgteUrL_MIOXFS5VSk	ILMN_2963754	9430015G10RIK	1.08	0.0401195	0.998485	-1.00408	0.853686	0.980364	-1.04541	0.0610658	0.998969	1.01227	0.57851	0.916631	-0.166245	0.669032	0.712761	0.0206947	-0.112712	0.756551
0Xo5Jf1F53rqvQvcR4	ILMN_1238679	9430023L20RIK	-1.02064	0.737149	0.998485	1.03739	0.456993	0.913041	1.0221	0.452152	0.998969	-1.07233	0.0182886	0.40227	0.0857214	0.813856	-0.322911	0.362792	0.260581	0.467133
QXRq3nf6AjaccXrn5c	ILMN_2607608	9430029K10RIK	-1.0275	0.613812	0.998485	-1.0319	0.553564	0.931765	1.05939	0.111522	0.998969	1.02644	0.415769	0.865854	0.703092	0.0233204	-0.357564	0.310394	-0.289978	0.416374
ZXRQKqKqbyQIB3T.18	ILMN_1253746	9430077A04RIK	-1.02114	0.278428	0.998485	NA	NA	NA	NA	NA	NA	NA	NA	NA	-0.308888	0.38517	NA	NA	NA	NA
KVUlHqPP5bP06yXl.0	ILMN_1253452	9530068E07RIK	1.02438	0.534977	0.998485	-1.06721	0.0423066	0.865421	1.07369	0.0538708	0.998969	-1.05848	0.112398	0.632215	-0.42156	0.224983	0.0657722	0.856744	-0.591366	0.0717602
oe4H6kUKUnej6K6Utw	ILMN_2833152	9530077C05RIK	-1.02412	0.29209	0.998485	-1.01066	0.659043	0.953909	-1.02389	0.244292	0.998969	-1.01234	0.590324	0.922021	0.0685388	0.850774	-0.316596	0.372788	0.252077	0.482304
6ElHnaq3SfVO53GLSo	ILMN_3001135	9930104L06RIK	1.04548	0.0597742	0.998485	-1.00999	0.567967	0.934588	1.02281	0.297755	0.998969	-1.00056	0.979673	0.998221	0.605185	0.063758	-0.296831	0.404931	-0.292748	0.411732
uizA.QuHN1IljJLvDs	ILMN_2627765	A030009H04RIK	-1.02503	0.667489	0.998485	-1.1117	0.145021	0.865421	-1.02665	0.757921	0.998969	1.00878	0.793186	0.970205	-0.382569	0.275233	0.326408	0.357316	0.346977	0.325957
ff6T.BUsghdEeukgqk	ILMN_2869139	A130010J15RIK	1.01971	0.324967	0.998485	-1.0059	0.746135	0.967209	NA	NA	NA	1.0247	0.227948	0.753153	0.374089	0.286903	-0.521284	0.122303	NA	NA
3glecdTd9FgMAp3p90	ILMN_2839745	A230050P20RIK	-1.01701	0.694788	0.998485	-1.00802	0.785711	0.97304	-1.01476	0.791203	0.998969	1.0235	0.495355	0.897646	-0.378761	0.280441	-0.552312	0.123072	0.201242	0.577183
Z3Bf7DuB4q3ZRAlQoc	ILMN_2601525	A230051G13RIK	1.01349	0.648053	0.998485	-1.01157	0.668952	0.955862	-1.00329	0.876756	0.998969	-1.03676	0.143157	0.675683	-0.0392074	0.914366	0.2375	0.508795	-0.0244725	0.946499
uAqe5VIZQSjoqBSMn0	ILMN_2925895	A2LD1	-1.00145	0.970531	0.998485	-1.08847	0.127291	0.865421	-1.0082	0.776216	0.998969	-1.02645	0.165876	0.696935	-0.720273	0.0286219	-0.173997	0.630698	-0.0423885	0.907442
3Hg41wAiTVxOO71EnU	ILMN_2714209	A330021E22RIK	-1.02336	0.465572	0.998485	-1.05679	0.0773898	0.865421	-1.04709	0.113663	0.998969	-1.01111	0.589104	0.920901	-0.0303745	0.933617	-0.225366	0.531298	-0.16557	0.647583
ZauAuCUUeDjXACJNXE	ILMN_2628236	A330021E22RIK	-1.06172	0.0205659	0.998485	-1.01677	0.437835	0.913041	-1.01159	0.652527	0.998969	1.00295	0.871066	0.985484	-0.505722	0.164847	0.395888	0.257435	0.10415	0.774627
94gQroTS7R6ekSGVKY	ILMN_2800881	A430005L14RIK	-1.04728	0.402247	0.998485	-1.0269	0.551878	0.931317	1.03719	0.170268	0.998969	-1.02707	0.34219	0.829911	0.159267	0.660307	-0.608884	0.0617198	0.329395	0.352671
xJZmPiH6aKJvKWqZ0c	ILMN_2706421	A430005L14RIK	1.0119	0.654815	0.998485	-1.00907	0.716478	0.961735	1.02227	0.243539	0.998969	1.0219	0.291885	0.797333	0.754292	0.0117088	-0.309967	0.383424	-0.293445	0.410568
9Gd4gQroTS7R6ekSGU	ILMN_2758300	A430005L14RIK	1.02332	0.572232	0.998485	-1.06825	0.0937702	0.865421	1.013	0.618701	0.998969	1.01214	0.691731	0.949302	0.302479	0.395615	-0.262051	0.464533	0.522094	0.12162
fZj4h_miibylqmdHTg	ILMN_1257788	A430005L14RIK	-1.02091	0.338062	0.998485	-1.05513	0.0942802	0.865421	1.00533	0.838439	0.998969	1.00275	0.91168	0.991054	0.553378	0.0970341	-0.156663	0.665588	-0.248667	0.488447
0ZekLCh1Ti7A454jv0	ILMN_2754561	A430033K04RIK	1.02342	0.305202	0.998485	NA	NA	NA	NA	NA	NA	NA	NA	NA	0.313163	0.378279	NA	NA	NA	NA
xp7_rI6iOznQAUkLeo	ILMN_2596421	A430079E08	-1.01029	0.632232	0.998485	NA	NA	NA	1.01191	0.512601	0.998969	NA	NA	NA	-0.230172	0.522337	NA	NA	-0.330395	0.351122
ERJNN3tf37qO_sX6n0	ILMN_1232341	A730008H23RIK	1.08287	0.00851928	0.936004	-1.03285	0.257948	0.884665	1.02431	0.348126	0.998969	1.00082	0.965997	0.997417	-0.728782	0.0168052	0.203079	0.573636	-0.131371	0.717533
uqfqeo.7fv_.wSreNE	ILMN_1238805	A730011L01RIK	-1.00322	0.916307	0.998485	1.00055	0.978934	0.997382	1.0353	0.169638	0.998969	NA	NA	NA	-0.0938825	0.796433	-0.0994589	0.784573	-0.181321	0.616147
6UCLltd25V_MGXxzdk	ILMN_1233444	A730017C20RIK	1.02191	0.725689	0.998485	-1.17321	0.139343	0.865421	1.08559	0.046609	0.998969	1.02089	0.5044	0.900776	-0.659696	0.0379461	-0.523084	0.120788	0.147423	0.705058
0U3EiYcLirEBWJJN10	ILMN_1219067	A830007P12RIK	-1.00962	0.687483	0.998485	-1.00314	0.846076	0.979603	NA	NA	NA	NA	NA	NA	-0.415241	0.266392	0.205725	0.568544	NA	NA
BRDhsDBKCaiTSpRcEk	ILMN_3160351	A830073O21RIK	-1.02523	0.174767	0.998485	NA	NA	NA	NA	NA	NA	1.01629	0.331066	0.823586	-0.518301	0.12484	NA	NA	NA	NA
oiqR3__OTf3dJOv0eI	ILMN_2962575	A830080D01RIK	1.00621	0.804919	0.998485	1.00722	0.676555	0.957087	1.00853	0.70608	0.998969	1.01042	0.685609	0.948109	-0.352128	0.318334	0.280265	0.43285	-0.438456	0.204968
Hvr_.9LKjvu4q3SjDo	ILMN_1255757	A830093I24RIK	NA	NA	NA	1.02352	0.215239	0.883043	1.00445	0.774965	0.998969	-1.04036	0.0522978	0.527888	NA	NA	-0.261043	0.466315	0.129287	0.721865
iqHUIYSsuIK1SCUd1I	ILMN_1230498	A930005I04RIK	1.00512	0.886708	0.998485	1.05467	0.0899421	0.865421	-1.0133	0.480255	0.998969	1.01962	0.254632	0.771132	-0.310325	0.382846	-0.0539801	0.882262	-0.163078	0.652604
cDkur8PdBJlQ_UCkq4	ILMN_2948014	AA388235	-1.01706	0.433667	0.998485	NA	NA	NA	-1.01702	0.346878	0.998969	-1.01058	0.584097	0.919006	0.420994	0.225671	NA	NA	-0.271211	0.480249
ud6hcI9C5wORLY1ufU	ILMN_3160592	AA415398	-1.01514	0.641357	0.998485	-1.02999	0.271083	0.889776	1.00078	0.970837	0.998969	-1.01181	0.603257	0.928591	-0.190263	0.598541	0.507083	0.134669	0.0481862	0.894837
ld51tFQb_AtUw38CD0	ILMN_2605630	AA881470	1.02829	0.654812	0.998485	1.03639	0.420465	0.90753	-1.01059	0.703933	0.998969	1.01823	0.528726	0.903357	-0.658326	0.0384885	0.45523	0.186158	0.25986	0.468412
ZU0J1xSpAiUBf3L7To	ILMN_3008733	AA960436	1.02202	0.615592	0.998485	1.01454	0.629971	0.948554	1.00676	0.848637	0.998969	1.01107	0.651414	0.93788	-0.348746	0.323328	-0.184446	0.609972	0.173536	0.631618
WUTF3sf7Q50v1GfyVI	ILMN_2686898	AAAS	1.03473	0.369056	0.998485	1.03013	0.19829	0.875854	1.00314	0.90613	0.998969	1.03434	0.140125	0.672851	0.474861	0.165485	-0.165314	0.648097	-0.0877388	0.809542
6lW51dcMvXqd.c_4e0	ILMN_1253601	AACS	-1.00705	0.887569	0.998485	-1.00434	0.929045	0.993023	1.01615	0.629274	0.998969	-1.05384	0.106128	0.622341	-0.561205	0.091424	-0.0119538	0.973855	0.416235	0.231513
c2cevCCoDyoLae6vlI	ILMN_2892904	AAGAB	1.02958	0.495704	0.998485	1.00862	0.848662	0.979922	-1.04102	0.449528	0.998969	-1.03004	0.419916	0.868544	0.0355058	0.922429	0.0960736	0.791768	-0.0566699	0.876432
x3IBLq55.nWr16vVHU	ILMN_1238583	AAGAB	1.04062	0.188442	0.998485	1.00105	0.977387	0.997273	-1.02351	0.572996	0.998969	-1.0072	0.746792	0.961379	0.0157754	0.9655	0.266254	0.457132	0.25059	0.484979
uZIvVAr6yioLX2_fdE	ILMN_3127491	AAK1	1.04566	0.459077	0.998485	-1.00275	0.965194	0.995312	1.01302	0.594344	0.998969	-1.12163	0.000108538	0.073474	-0.172472	0.633741	0.523531	0.120413	0.36043	0.340654
9h.j2eu4lOq5t.s76o	ILMN_1234981	AAMP	1.01027	0.841914	0.998485	-1.00916	0.781505	0.972677	-1.0049	0.895389	0.998969	-1.02917	0.52072	0.902475	0.673565	0.0327416	-0.652543	0.0408362	0.205308	0.569345
i7tyPUVMV2O6UmIKn0	ILMN_1237572	AARD	-1.00637	0.851104	0.998485	-1.10321	0.319642	0.895167	1.00878	0.715623	0.998969	1.01647	0.448147	0.880766	0.201168	0.577325	0.436972	0.206683	-0.17067	0.637346
ZSXin8reSKCgl.3eSA	ILMN_1258394	AARS	1.05504	0.0293504	0.998485	-1.04031	0.203423	0.875854	-1.00963	0.763189	0.998969	-1.02607	0.319001	0.814708	0.169929	0.662045	-0.0605595	0.868011	-0.0150281	0.967133
iWpRSiHsIBAJQeIpJA	ILMN_2876302	AARS2	1.03995	0.191661	0.998485	1.01507	0.459307	0.913064	1.00794	0.678537	0.998969	1.00402	0.821751	0.977831	0.174941	0.628815	-0.00536099	0.988273	0.330136	0.351523
fSrp4LfoKQKJKggqWc	ILMN_2918440	AARSD1	-1.02783	0.528613	0.998485	1.00767	0.808278	0.976207	1.03018	0.476344	0.998969	-1.01267	0.730739	0.957813	0.669828	0.034093	-0.114026	0.753786	-0.0291445	0.936301
uXde63qDQ5_8_rkgEM	ILMN_1221418	AASDH	-1.01274	0.753149	0.998485	1.01844	0.418591	0.90753	-1.04852	0.0541101	0.998969	1.00342	0.880212	0.985741	-0.4267	0.21878	-0.259584	0.468902	0.0673713	0.853292
TrT66N9KCL5.1LFSEY	ILMN_3122864	AATF	1.03354	0.273454	0.998485	1.02974	0.286328	0.891024	-1.03692	0.0607762	0.998969	1.04112	0.0172071	0.393676	-0.263251	0.462415	-0.134699	0.710634	-0.0203599	0.955481
WcWL36QFolLV4l75Ig	ILMN_3047301	AATF	-1.01036	0.753677	0.998485	-1.03998	0.0720521	0.865421	-1.02573	0.405084	0.998969	-1.00107	0.959401	0.9962	-0.261045	0.466312	0.317614	0.371168	0.12773	0.725104
fv4p8o6GeuQ4.371_8	ILMN_1231439	AATK	1.0017	0.971104	0.998485	-1.06516	0.178678	0.875762	-1.02948	0.267781	0.998969	1.02644	0.463469	0.886864	-0.686492	0.028348	0.450301	0.191575	0.475463	0.164874
TS5QwquKEcEuweuFG4	ILMN_1248367	ABAT	1.0384	0.517818	0.998485	1.02999	0.780822	0.972677	-1.03927	0.545132	0.998969	1.00085	0.986613	0.998221	-0.333485	0.346361	0.333113	0.346932	-0.0323744	0.929255
Et3JSn7S_5KAQpetck	ILMN_2925947	ABAT	1.06268	0.242182	0.998485	1.03015	0.744873	0.967206	-1.0269	0.546218	0.998969	1.00308	0.923127	0.991652	-0.111328	0.759467	-0.0174486	0.961843	-0.168407	0.641882
r15XXVBxTXVYPuUCno	ILMN_1216987	ABCA2	1.00597	0.838679	0.998485	1.0025	0.920811	0.991608	-1.01973	0.572612	0.998969	-1.06823	0.0231668	0.438492	-0.45268	0.221127	-0.110582	0.761039	0.00134042	0.997068
uXogJQogs6Lo48d7iU	ILMN_1243488	ABCA3	1.00973	0.720205	0.998485	-1.01337	0.644849	0.950072	1.01008	0.583493	0.998969	NA	NA	NA	-0.557073	0.0943589	-0.277219	0.438077	0.00920919	0.979857
QtNUSJNpJEIiJ7pSH4	ILMN_3150233	ABCA3	1.00991	0.767364	0.998485	-1.04338	0.3252	0.895167	1.01398	0.725698	0.998969	-1.01388	0.574103	0.915882	-0.292788	0.411665	-0.00908499	0.980128	0.0382581	0.916433
rv1AXpaSTVAbtJY9eg	ILMN_1221703	ABCA7	1.00077	0.981633	0.998485	-1.06973	0.140443	0.865421	-1.06462	0.0665656	0.998969	-1.02091	0.440097	0.875628	-0.664798	0.0359709	0.477647	0.162668	0.26126	0.465932
l4lpjJfTSjRPV6p4HU	ILMN_2896639	ABCA7	-1.01649	0.599078	0.998485	1.02252	0.27339	0.890909	1.00057	0.976583	0.998969	-1.00995	0.57627	0.915882	0.152606	0.673841	0.101125	0.781037	0.366862	0.297054
r.Fzp6.cd3Lp0CQ.7c	ILMN_2686700	ABCA8A	1.04064	0.136355	0.998485	-1.03008	0.57853	0.937512	1.01252	0.514857	0.998969	-1.0139	0.454373	0.884143	-0.645066	0.0440123	0.0794135	0.827374	-0.435326	0.208595
QniKy8DoRF5bl344gk	ILMN_2591782	ABCB10	-1.02887	0.358809	0.998485	1.01802	0.469008	0.915195	-1.02772	0.223402	0.998969	1.01904	0.420284	0.868972	-0.176419	0.625872	-0.114948	0.751848	-0.579747	0.0789723
3DrQTUpaREgfOB37xI	ILMN_2648742	ABCB4	1.00288	0.950458	0.998485	1.08878	0.0263987	0.865421	-1.03065	0.197038	0.998969	-1.00443	0.839247	0.981709	-0.221428	0.538684	0.288924	0.418148	-0.166459	0.645793
BKCkYJXntWK6b85Yjs	ILMN_2833596	ABCB6	1.00946	0.736694	0.998485	1.05531	0.0626281	0.865421	1.02277	0.235606	0.998969	-1.02415	0.299946	0.800909	0.00514789	0.988739	-0.0121668	0.973389	0.492282	0.148346
KUWnyx7W5JUdTT7TpQ	ILMN_2663015	ABCB8	1.01904	0.409183	0.998485	-1.00157	0.954422	0.994812	1.01176	0.534706	0.998969	-1.04367	0.0791855	0.588887	-0.319006	0.368958	0.400983	0.250799	-0.321315	0.365306
fBHS_.qV0dSiHpSl6w	ILMN_2864834	ABCB8	-1.00083	0.972185	0.998485	1.00613	0.784909	0.972986	1.00181	0.945578	0.998969	1.01036	0.699518	0.952578	-0.054712	0.880675	0.481039	0.159278	0.260633	0.467042
KEiV_gpS7nou6XkceU	ILMN_2590908	ABCB8	1.00928	0.697627	0.998485	-1.00683	0.802805	0.975421	1.00092	0.96696	0.998969	-1.00823	0.712617	0.955244	0.230161	0.522358	0.258192	0.471374	0.140608	0.69843
ls90j66KqFCkOVKt6c	ILMN_2597248	ABCB9	1.01675	0.784524	0.998485	1.05523	0.176381	0.875762	-1.03597	0.182228	0.998969	-1.04534	0.0581129	0.545929	-0.504414	0.137076	-0.349537	0.322157	-0.105694	0.771359
xz3SProqoUKQ5Uq3p8	ILMN_2597249	ABCB9	1.10215	0.0966126	0.998485	1.04385	0.261038	0.886136	1.03079	0.273157	0.998969	-1.03171	0.351376	0.833567	-0.376831	0.283101	-0.314652	0.375891	-0.445361	0.197097
lUqeetzv9d7n3F33Rs	ILMN_1238608	ABCC10	1.03113	0.289457	0.998485	1.03139	0.258044	0.884665	-1.02317	0.346409	0.998969	1.02118	0.304987	0.802985	-0.644856	0.0441034	-0.240428	0.503425	-0.448136	0.193984
HpzVb2nezvVFA7145U	ILMN_3048492	ABCC5	1.02329	0.774963	0.998485	1.02049	0.592621	0.939387	-1.09232	0.0222106	0.998969	-1.05025	0.271278	0.777817	-0.606167	0.0632127	-0.45452	0.186933	-0.296964	0.404712
xqX24gIUk3006GCQeU	ILMN_2645526	ABCC8	-1.06283	0.0870856	0.998485	-1.06512	0.130159	0.865421	1.00553	0.818516	0.998969	-1.03468	0.184362	0.714797	0.226905	0.557129	-0.698769	0.0245653	0.203275	0.573258
x_3A_UE4sV5SRKK4eo	ILMN_1245447	ABCD1	-1.00192	0.961594	0.998485	1.02577	0.265158	0.887169	-1.02367	0.272307	0.998969	1.01311	0.517349	0.900941	0.3274	0.35577	0.0536005	0.883085	0.650909	0.0415166
3b4uKAJAL6LZJ2eg9U	ILMN_1243944	ABCD2	1.05139	0.131243	0.998485	NA	NA	NA	1.03093	0.117218	0.998969	-1.01168	0.561975	0.913298	0.386643	0.26972	NA	NA	0.459108	0.181959
K0p5z6p6j9XHdTBESk	ILMN_1245831	ABCD2	1.0306	0.390078	0.998485	-1.03039	0.178461	0.875762	1.02878	0.248513	0.998969	-1.0014	0.942063	0.993858	0.392016	0.262541	-0.0387373	0.915389	0.1065	0.769655
ioGt3h16EHHXs2nenU	ILMN_2925281	ABCD3	1.00118	0.979587	0.998485	-1.01521	0.659387	0.953909	-1.04566	0.203188	0.998969	-1.00054	0.986495	0.998221	-0.573994	0.0827104	0.392298	0.262167	-0.0859756	0.813312
lEhCglY4lqCiUSPReI	ILMN_2981792	ABCD4	-1.01289	0.627865	0.998485	1.00985	0.644725	0.950072	-1.00469	0.791081	0.998969	1.00725	0.705106	0.953621	-0.0733463	0.851248	0.206944	0.566204	-0.240328	0.50361
KUarnvXl0glPfR46hE	ILMN_2607474	ABCD4	1.03107	0.226584	0.998485	NA	NA	NA	NA	NA	NA	1.00429	0.80977	0.975109	0.107908	0.766681	NA	NA	NA	NA
3eg84oK6PEOBKkpIEo	ILMN_2982652	ABCE1	1.00707	0.862657	0.998485	-1.00115	0.983755	0.997614	1.0339	0.599201	0.998969	1.00174	0.952602	0.99602	0.125144	0.730495	0.351454	0.319326	0.268441	0.453303
W4JtUKLEW5n0X1SFVY	ILMN_2760415	ABCF1	1.11903	0.0134275	0.972566	1.01018	0.737805	0.966315	1.04382	0.090471	0.998969	-1.016	0.452424	0.883204	-0.249217	0.487454	-0.191014	0.597071	-0.057754	0.874084
EJtUKLEW5n0X1SFVZc	ILMN_2693594	ABCF1	1.05509	0.204403	0.998485	1.01869	0.414615	0.906111	1.02092	0.333365	0.998969	-1.00721	0.825009	0.977831	-0.218114	0.544934	-0.424294	0.221672	-0.375627	0.284768
xIrhf57nq9V0pcvCuk	ILMN_2768926	ABCF1	1.06779	0.173593	0.998485	-1.01491	0.724176	0.962919	-1.02079	0.55097	0.998969	-1.0215	0.500611	0.899508	-0.278536	0.435814	-0.40897	0.240591	0.552704	0.0975272
o1RbmsI1RRe0865IG4	ILMN_1249522	ABCF2	1.13024	0.046777	0.998485	-1.00536	0.865285	0.981351	1.05499	0.137435	0.998969	-1.00546	0.854475	0.984525	-0.229891	0.522859	-0.403868	0.247085	-0.162683	0.6534
0hntP8.VFuawjVFF7Q	ILMN_2669034	ABCF2	1.17733	0.0125657	0.972566	-1.02233	0.487109	0.918054	-1.039	0.225235	0.998969	1.00388	0.905664	0.989293	-0.383187	0.274392	-0.562945	0.0902054	-0.0753894	0.83602
9lJU0FW9fPn3r_id6k	ILMN_2789544	ABCF2	-1.00451	0.922803	0.998485	-1.0856	0.00853717	0.844109	1.03534	0.306634	0.998969	-1.00283	0.927733	0.991937	-0.171554	0.635576	-0.526759	0.117732	0.167462	0.643779
Qc7tNxQu1DAIoJxIVU	ILMN_1242066	ABCF2	1.01853	0.676467	0.998485	-1.01745	0.679041	0.957087	1.01349	0.781603	0.998969	-1.03424	0.394738	0.855186	-0.20762	0.591941	0.312145	0.379913	0.281577	0.430606
lev_gjV4nFOykFB1Cc	ILMN_2677696	ABCF3	1.02753	0.296879	0.998485	-1.02769	0.423446	0.907656	-1.0505	0.227266	0.998969	1.03207	0.266706	0.777817	-0.0599885	0.869246	0.227354	0.527582	-0.0468349	0.897773
fWtIZHrt7sfag783uM	ILMN_2441335	ABCG1	1.00255	0.956197	0.998485	1.00314	0.914769	0.99086	-1.02023	0.378223	0.998969	-1.00567	0.880511	0.985741	0.556489	0.0947787	0.25817	0.502404	-0.292383	0.412343
f1zN6.dddSh39VLV7k	ILMN_1225587	ABCG4	-1.01547	0.729845	0.998485	-1.01139	0.723569	0.962681	1.01145	0.769024	0.998969	-1.01495	0.640667	0.935983	-0.536464	0.109893	0.0935313	0.797181	-0.0261499	0.942836
ieF6ix0deCOgInhCKE	ILMN_1245678	ABHD1	-1.03582	0.237896	0.998485	-1.01453	0.490883	0.918591	-1.00387	0.846018	0.998969	1.00844	0.575785	0.915882	-0.496654	0.144222	0.0733666	0.840372	-0.12098	0.739196
0Vw7X8iX3eS3H9FJTk	ILMN_1231518	ABHD10	1.00164	0.946049	0.998485	-1.03293	0.194532	0.875854	-1.00799	0.697854	0.998969	1.02259	0.279795	0.787257	-0.230184	0.522314	0.0512805	0.888119	-0.297003	0.404646
lerUSYQFUIfTo57RSc	ILMN_2453209	ABHD11	-1.05654	0.374141	0.998485	-1.03069	0.40822	0.905432	1.00709	0.8764	0.998969	1.00138	0.962814	0.996857	0.56163	0.0911255	-0.580301	0.0786181	0.12532	0.730127
lXICKHSESakinXjoXs	ILMN_2774267	ABHD12	1.02168	0.646612	0.998485	1.0113	0.800333	0.975102	1.007	0.861468	0.998969	-1.00459	0.870779	0.985484	0.230237	0.522216	0.0494855	0.892015	0.216708	0.547593
62ItH0knWUXlQUdTrg	ILMN_2888454	ABHD14A	-1.02583	0.405691	0.998485	1.0097	0.71207	0.961393	-1.01245	0.613071	0.998969	1.01599	0.486441	0.895877	0.129854	0.720686	-0.182539	0.613738	-0.127183	0.726243
Qk6M90lCVP15Xiv6i4	ILMN_3007862	ABHD14B	-1.06151	0.284033	0.998485	-1.11127	0.0735568	0.865421	-1.04781	0.317733	0.998969	1.04484	0.169299	0.70116	-0.24137	0.501704	-0.326953	0.356466	0.173431	0.631827
Nf_4d307578y3pW6oQ	ILMN_2731523	ABHD16A	1.0132	0.741808	0.998485	1.04264	0.125543	0.865421	-1.00515	0.913263	0.998969	-1.02508	0.452133	0.882788	-0.249098	0.48767	0.312049	0.380068	-0.178833	0.621075
xv96Kg3pcpDkfE6Ni0	ILMN_2677728	ABHD3	1.03981	0.433344	0.998485	-1.06681	0.436445	0.913041	1.0287	0.491694	0.998969	-1.00155	0.967136	0.997473	0.380872	0.277547	-0.0808383	0.824317	-0.407143	0.242905
cd1Lg3T1K153CneqHI	ILMN_2713464	ABHD4	1.06148	0.139143	0.998485	-1.05602	0.444705	0.913041	-1.01882	0.552418	0.998969	1.02421	0.425209	0.870002	-0.329733	0.352147	0.392652	0.261699	0.0907764	0.803055
6rIE.uSh3x_ktFJdLc	ILMN_2739295	ABHD5	1.04637	0.135075	0.998485	-1.02248	0.482734	0.916663	1.00606	0.793766	0.998969	1.03879	0.179304	0.711584	-0.385901	0.270719	-0.0173931	0.961964	-0.312346	0.37959
rUXa0lcIPhQiogTEh4	ILMN_2853619	ABHD6	-1.00993	0.745969	0.998485	1.00931	0.725549	0.963155	-1.00071	0.977095	0.998969	-1.02477	0.26632	0.777817	-0.128223	0.742338	-0.249326	0.487257	0.478256	0.162056
Nk5VImBSkS0u_iHS5U	ILMN_3002505	ABHD8	1.02133	0.74796	0.998485	1.00344	0.939959	0.994083	1.01335	0.575949	0.998969	-1.05241	0.0964918	0.608755	0.655112	0.0397817	-0.164315	0.65011	-0.106473	0.769713
3RELur9zseKvkj84SQ	ILMN_1234139	ABI1	-1.02694	0.502152	0.998485	1.08035	0.177417	0.875762	-1.03635	0.247184	0.998969	1.03352	0.451603	0.882788	0.0401597	0.918297	0.157767	0.685192	-0.340018	0.336401
iMugsuigmgliIEuokk	ILMN_3094886	ABI1	1.02318	0.47289	0.998485	1.01264	0.672885	0.956692	1.02559	0.456312	0.998969	-1.01544	0.552912	0.910252	-0.558705	0.093193	-0.491286	0.149295	0.182545	0.613726
xE9fu5lPCRdSODioS0	ILMN_3006643	ABI2	1.00585	0.919893	0.998485	1.13255	0.169146	0.869529	-1.02234	0.475688	0.998969	-1.01872	0.617471	0.930421	-0.393524	0.260546	0.400919	0.250881	-0.459098	0.18197
xzjekvEcKvVIi_useI	ILMN_3006644	ABI2	1.00814	0.877375	0.998485	1.14424	0.135035	0.865421	1.01243	0.733589	0.998969	-1.01718	0.577918	0.916577	-0.380668	0.277826	0.397961	0.254723	-0.0998082	0.783832
ri.CRdlSKFVJ050gjY	ILMN_1223041	ABI3	1.01526	0.796299	0.998485	1.0307	0.272175	0.890408	1.01168	0.665792	0.998969	-1.01432	0.370345	0.843612	-0.0938259	0.796553	-0.464083	0.176656	0.497343	0.143578
ftkShJB0XeBLxUUCCk	ILMN_3132588	ABI3BP	1.00485	0.962442	0.998485	1.25856	0.0241423	0.865421	-1.13891	0.0441705	0.998969	1.1181	0.0285058	0.450407	-0.035216	0.92306	0.792745	0.00623293	-0.132386	0.715429
3HRKn0FA1UhCHX.qoE	ILMN_2630626	ABI3BP	-1.10158	0.238431	0.998485	1.07678	0.0994503	0.865421	-1.03656	0.300232	0.998969	1.00737	0.786574	0.96905	0.667871	0.0493047	0.672993	0.032946	0.367839	0.295672
QVC2cIgiZVeOlA1cgw	ILMN_2768786	ABLIM2	1.07741	0.150615	0.998485	-1.01773	0.723059	0.962617	1.05109	0.189904	0.998969	1.00398	0.903784	0.989293	-0.60581	0.0634103	-0.317863	0.370772	-0.293806	0.409964
cAulskVYt3S5HWEkhc	ILMN_1250869	ABLIM2	1.05208	0.0587441	0.998485	1.02244	0.473139	0.915974	1.03475	0.304135	0.998969	-1.00456	0.858978	0.984632	-0.229206	0.524133	-0.508155	0.13371	-0.0699864	0.847652
6Rksw137MOoRBOeXls	ILMN_1214945	ABLIM3	1.01454	0.563848	0.998485	NA	NA	NA	NA	NA	NA	-1.00808	0.7294	0.957813	-0.077461	0.831567	NA	NA	NA	NA
i3kT6CrhqmioeQqG.A	ILMN_1228600	ABLIM3	1.01028	0.615744	0.998485	NA	NA	NA	NA	NA	NA	NA	NA	NA	0.0963133	0.791258	NA	NA	NA	NA
KkT6CrhqmioeQqG.Ds	ILMN_2666155	ABLIM3	1.01085	0.643462	0.998485	NA	NA	NA	NA	NA	NA	NA	NA	NA	-0.521895	0.121788	NA	NA	NA	NA
TOCqEffeel_euHoieo	ILMN_2771109	ABPB	-1.00327	0.897856	0.998485	NA	NA	NA	NA	NA	NA	NA	NA	NA	0.0459503	0.899696	NA	NA	NA	NA
N7SQJQhSrv2oRhIlQs	ILMN_2605311	ABR	NA	NA	NA	NA	NA	NA	-1.01265	0.396971	0.998969	-1.04594	0.0312317	0.466144	NA	NA	NA	NA	-0.230709	0.521339
65FCgs3rr3XiOql_SU	ILMN_2687062	ABR	1.05123	0.502332	0.998485	1.07444	0.327613	0.895167	-1.01113	0.822396	0.998969	-1.0965	0.0336443	0.477089	0.049743	0.891456	-0.123521	0.733884	0.191099	0.596904
6WTEqehKGyqu7pDAn4	ILMN_2699477	ABTB1	1.01699	0.81703	0.998485	1.01484	0.595861	0.939387	-1.01776	0.520703	0.998969	-1.06448	0.0266935	0.450011	-0.433355	0.210898	-0.771497	0.00895804	-0.0261527	0.94283
Q6hFevkCU.sX_Kio5I	ILMN_2762728	ACAA1A	1.01207	0.671331	0.998485	-1.06933	0.169357	0.869529	-1.05416	0.242556	0.998969	-1.00958	0.794207	0.970355	-0.101302	0.780663	-0.180843	0.617092	-0.315088	0.375195
HupHqk1DWvd2tgUCEs	ILMN_2659997	ACAA1B	-1.05034	0.0398698	0.998485	NA	NA	NA	NA	NA	NA	NA	NA	NA	-0.412148	0.270333	NA	NA	NA	NA
ZUgRJeCk0QkR5UR8eo	ILMN_2788984	ACAA2	1.00753	0.816007	0.998485	-1.01197	0.663145	0.954626	1.0444	0.0552383	0.998969	-1.03266	0.217638	0.742118	0.669578	0.0341845	-0.724054	0.017895	0.616012	0.0579146
fonxqpfdCh93lFj8Hg	ILMN_2704823	ACAA2	1.00789	0.820699	0.998485	1.00773	0.876749	0.982265	1.01622	0.482195	0.998969	-1.012	0.697293	0.951553	0.424913	0.220926	-0.602759	0.0651183	-0.0502173	0.890426
66J8aqX3Qofd5RY.B4	ILMN_2704822	ACAA2	-1.01354	0.671852	0.998485	-1.00631	0.869191	0.982106	1.01007	0.715083	0.998969	1.03097	0.187394	0.715742	-0.194725	0.589826	-0.630836	0.0505048	-0.405342	0.245199
r_ifGql90KH3eUWPwc	ILMN_2704826	ACAA2	-1.00756	0.801283	0.998485	1.00237	0.947776	0.994451	-1.00703	0.793031	0.998969	1.03138	0.184405	0.714797	-0.0352665	0.922951	-0.174091	0.630509	-0.227507	0.527298
ljkoFJLlSLsjni.pOs	ILMN_2821158	ACAD10	-1.02603	0.261375	0.998485	NA	NA	NA	NA	NA	NA	NA	NA	NA	-0.460243	0.180741	NA	NA	NA	NA
Bjeh7dl_Mfe03_CX6U	ILMN_2615170	ACAD8	1.03482	0.267603	0.998485	-1.01112	0.745081	0.967206	-1.00932	0.690849	0.998969	1.01516	0.397358	0.856027	-0.246797	0.49183	-0.208607	0.563018	0.161146	0.656505
roDigSKRA.5UWd7FOg	ILMN_2754690	ACAD8	1.07079	0.00684058	0.923769	-1.02643	0.477712	0.915974	1.00068	0.973608	0.998969	-1.02755	0.278732	0.785803	-0.155665	0.667615	-0.320952	0.365878	-0.0309195	0.932428
frvAmrJQTXTQfs6Th4	ILMN_1253361	ACAD9	1.04095	0.340637	0.998485	-1.01738	0.582927	0.938715	1.01846	0.361201	0.998969	-1.0215	0.43132	0.87274	-0.370769	0.291544	0.257205	0.50406	0.240514	0.503268
KvAmrJQTXTQfs6Th54	ILMN_2656805	ACAD9	1.02265	0.564894	0.998485	-1.03805	0.325449	0.895167	1.01015	0.767322	0.998969	-1.00046	0.98684	0.998221	-0.217797	0.545534	0.0765361	0.833555	-0.00337606	0.992615
lSiDf9dok4T.Woi7Cg	ILMN_2689473	ACADL	1.004	0.895605	0.998485	-1.01652	0.499541	0.919326	-1.00722	0.696768	0.998969	1.00614	0.748974	0.961379	-0.143301	0.692887	0.0595131	0.870275	-0.14854	0.702905
inUz1VKE_vVFO8VUFU	ILMN_2783519	ACADL	NA	NA	NA	-1.00497	0.805698	0.975961	1.00577	0.738283	0.998969	NA	NA	NA	NA	NA	-0.44945	0.19252	0.0488666	0.893359
0aPVOmigXt9J3OuFf0	ILMN_2810473	ACADM	-1.01915	0.744352	0.998485	1.05599	0.194315	0.875854	-1.0312	0.41797	0.998969	1.01633	0.700279	0.952578	0.518448	0.124714	0.644097	0.0444354	0.315621	0.374343
HulSOkaL9Lv4tVKvns	ILMN_2806676	ACADS	1.0047	0.842741	0.998485	-1.0298	0.372467	0.899257	1.02654	0.225275	0.998969	-1.00025	0.988584	0.998221	-0.249108	0.487651	-0.705004	0.0227839	-0.0402976	0.911992
HL1S87.yqwwL06e_jQ	ILMN_2614728	ACADSB	-1.04214	0.529323	0.998485	-1.01491	0.834276	0.977763	-1.02239	0.765806	0.998969	-1.02937	0.397603	0.856054	-0.597799	0.067958	0.193719	0.591787	-0.0379468	0.917111
TuKnFYaRJOIA53uMno	ILMN_2956932	ACADVL	1.07511	0.00547462	0.896559	-1.01393	0.721657	0.962562	-1.01327	0.66677	0.998969	-1.00651	0.792942	0.970205	-0.443247	0.199487	-0.608568	0.0618924	0.383963	0.27334
inrHdRXuVDvf7x4ij8	ILMN_1236232	ACAP3	-1.02601	0.501407	0.998485	1.00895	0.916866	0.991589	1.04653	0.131808	0.998969	-1.06909	0.00224087	0.199285	-0.474076	0.166283	0.183417	0.612003	0.426116	0.21948
ud4zK1LrV87qqVFDl8	ILMN_2962083	ACAP3	-1.04263	0.248528	0.998485	1.00766	0.850637	0.980362	-1.01149	0.649702	0.998969	1.02808	0.29399	0.797934	0.2842	0.458599	-0.486929	0.153492	0.671884	0.033345
3H6jvyKXuO8pUkhLho	ILMN_2643977	ACAT1	-1.03021	0.200267	0.998485	NA	NA	NA	NA	NA	NA	NA	NA	NA	0.340847	0.335148	NA	NA	NA	NA
o9Sniuqys9Se9y0gh4	ILMN_1253008	ACAT2	-1.02601	0.529339	0.998485	-1.04664	0.190437	0.875854	-1.05098	0.142891	0.998969	1.02538	0.339609	0.82884	0.467769	0.172786	-0.318229	0.37019	0.525334	0.11891
HX736iS4O0fxOnv3tE	ILMN_1235783	ACBD3	1.04341	0.305399	0.998485	-1.02894	0.380717	0.899257	1.05645	0.0176615	0.998969	-1.00076	0.979231	0.998221	-0.288401	0.41903	0.518736	0.124468	-0.251349	0.483612
0Xgh4_noK_vkoCFolU	ILMN_2689540	ACBD4	1.04461	0.352601	0.998485	-1.00839	0.768837	0.97065	-1.03849	0.187792	0.998969	1.00151	0.957647	0.99602	0.159397	0.660045	0.134702	0.710628	0.253363	0.479996
9qH6F6Xgh4_noK_vko	ILMN_3150296	ACBD4	1.01899	0.744984	0.998485	1.04131	0.235396	0.883779	-1.00887	0.685661	0.998969	-1.00242	0.938911	0.993628	0.126929	0.726772	-0.160332	0.658151	-0.17644	0.62583
WGnn5SCK4ankCa3d54	ILMN_1232903	ACBD6	-1.01151	0.732675	0.998485	-1.02052	0.483377	0.916724	1.00635	0.869368	0.998969	-1.0043	0.868099	0.984632	0.209107	0.562061	-0.256142	0.475026	-0.0161408	0.964701
rdff90kXuigsa6Xq4U	ILMN_1219242	ACCN1	-1.04493	0.379171	0.998485	1.01424	0.717905	0.961735	1.02848	0.394955	0.998969	-1.09563	0.00243815	0.207839	0.151643	0.696934	0.212716	0.555172	0.157878	0.663121
612BZedx6dL9W0RGYs	ILMN_1255375	ACCN1	1.01015	0.81161	0.998485	1.01689	0.493515	0.919149	-1.0078	0.699848	0.998969	-1.02092	0.412175	0.864937	-0.193062	0.593069	0.266356	0.456954	0.184996	0.608888
EkjRe7G_l6JSIkKf6Q	ILMN_2643241	ACCN2	1.03912	0.551041	0.998485	1.03943	0.259095	0.886136	1.00732	0.834667	0.998969	1.05679	0.0437723	0.501895	0.0379074	0.917197	0.31748	0.37138	0.460479	0.180488
TqcSiHi7o5lP7S6h0Y	ILMN_2776485	ACCS	-1.00488	0.842145	0.998485	-1.0179	0.408366	0.905432	1.0003	0.984544	0.998969	-1.00346	0.846097	0.98412	-0.343262	0.33151	0.135324	0.70934	0.26126	0.465931
0VKzii0eoTJIoROp4Y	ILMN_2930819	ACD	-1.01309	0.801657	0.998485	-1.00262	0.947961	0.994451	1.00706	0.843654	0.998969	-1.00023	0.993231	0.998817	-0.239178	0.505715	-0.568462	0.0864107	-0.0154966	0.966109
KprOxXp4LDPBTJ3qKM	ILMN_2629112	ACER2	1.00043	0.988443	0.998485	-1.0389	0.433948	0.913041	-1.05343	0.128803	0.998969	1.19453	4.68811e-06	0.0269754	0.446206	0.22863	0.26941	0.451609	0.495096	0.145683
crog.qf98ErwS.uetM	ILMN_2669782	ACER3	-1.0133	0.667463	0.998485	-1.01167	0.67077	0.955973	1.04042	0.265771	0.998969	-1.007	0.793188	0.970205	-0.192118	0.594914	0.0528304	0.884756	0.10154	0.780157
l6Xvqz8nXp.N2.lehc	ILMN_2681057	ACER3	-1.04104	0.140353	0.998485	-1.03883	0.183592	0.875854	-1.01478	0.540567	0.998969	1.02167	0.417418	0.866725	0.183154	0.612523	-0.145766	0.687825	0.329471	0.352553
H.Cp6jMMYWJVSle1HU	ILMN_1227999	ACHE	1.03823	0.281823	0.998485	-1.10059	0.238579	0.883779	1.01712	0.447122	0.998969	-1.001	0.967592	0.997506	0.418879	0.228257	-0.0809237	0.824134	0.441195	0.201825
uHFJBeld9dd9dSIhS0	ILMN_2755195	ACIN1	-1.02529	0.572061	0.998485	1.01558	0.736666	0.966197	1.0188	0.517156	0.998969	-1.00033	0.994119	0.998817	0.377009	0.282855	-0.350671	0.320481	0.160832	0.65714
We8LeIqCJynOCoI7pY	ILMN_2724347	ACIN1	-1.05334	0.180644	0.998485	1.02029	0.496259	0.919326	1.00263	0.916665	0.998969	-1.03802	0.118602	0.640099	0.502705	0.13863	0.112193	0.757644	0.312561	0.379245
BnuA7fu0u13u9OSWH4	ILMN_1240770	ACLY	1.09237	0.126084	0.998485	-1.06032	0.373431	0.899257	-1.05136	0.0958732	0.998969	1.00089	0.97497	0.997506	-0.161389	0.656015	0.193866	0.591501	0.0467284	0.898004
xSSECdB6AJu.6Rd3VI	ILMN_2801568	ACN9	-1.06718	0.202441	0.998485	-1.05201	0.108523	0.865421	1.00147	0.958924	0.998969	-1.00198	0.955659	0.99602	0.542471	0.105211	-0.393564	0.260494	0.142634	0.694258
xN6Pcg0agrWyxQIgdk	ILMN_1216382	ACO1	1.00536	0.866733	0.998485	NA	NA	NA	1.00509	0.78947	0.998969	-1.02436	0.21049	0.73567	0.0797236	0.826709	NA	NA	-0.0465855	0.898315
0eXJdJUuBRT4qb8Iw4	ILMN_2748837	ACO2	1.0342	0.357198	0.998485	-1.01927	0.606237	0.944217	-1.02364	0.591466	0.998969	-1.05154	0.0329382	0.477089	0.144972	0.689455	-0.310077	0.383248	-0.0212573	0.953521
l7Qtfh6ZOSjXq9DUnk	ILMN_3139875	ACOT1	1.00089	0.988898	0.998485	-1.0706	0.0958861	0.865421	1.02297	0.376445	0.998969	-1.02526	0.440286	0.875772	-0.420341	0.226469	-0.562939	0.0902093	0.329815	0.352021
EW06d6fPEHGOF1UIE4	ILMN_3062267	ACOT1	-1.00138	0.957114	0.998485	-1.01138	0.614222	0.945942	-1.01608	0.527506	0.998969	-1.01206	0.519414	0.902388	0.0906723	0.803277	-0.558887	0.0930631	-0.190957	0.597183
fkdWke4TLlwwK7niAA	ILMN_2910627	ACOT10	-1.03365	0.442928	0.998485	-1.08203	0.00443948	0.819637	1.01006	0.741767	0.998969	-1.01951	0.421052	0.869143	0.196518	0.586338	-0.0258361	0.947396	0.112966	0.756017
lSivSp9fTVSMTJC5Kk	ILMN_2799351	ACOT11	-1.01015	0.732707	0.998485	-1.07924	0.0355126	0.865421	-1.04343	0.078862	0.998969	-1.00845	0.683861	0.948109	0.109664	0.762974	0.18375	0.611345	0.561886	0.0909456
BdihoCF7qBf53lv_yE	ILMN_1227579	ACOT11	1.01885	0.637729	0.998485	-1.14545	0.0594414	0.865421	-1.04094	0.306826	0.998969	-1.0146	0.742213	0.95988	-0.629884	0.0509604	0.0765922	0.833434	-0.295396	0.407316
iXqgeIEmoIVgglQQ5Q	ILMN_2961626	ACOT13	-1.13652	0.0895283	0.998485	-1.05516	0.0505266	0.865421	1.0203	0.639733	0.998969	-1.00788	0.829695	0.979217	0.393082	0.26113	-0.194956	0.589377	-0.151729	0.675629
WkgHlv.aAdLdUmJ7Lk	ILMN_2644827	ACOT3	NA	NA	NA	NA	NA	NA	NA	NA	NA	-1.00875	0.597217	0.925377	NA	NA	NA	NA	NA	NA
cX61MnlVRJz.jCXNdc	ILMN_2718421	ACOT5	NA	NA	NA	NA	NA	NA	-1.00146	0.938458	0.998969	-1.0179	0.319644	0.81521	NA	NA	NA	NA	0.115265	0.751182
om1I45Q7p6Q706KhT0	ILMN_2660182	ACOT7	1.04623	0.516576	0.998485	-1.17284	0.105039	0.865421	1.03824	0.218325	0.998969	1.02134	0.631924	0.935148	0.347512	0.325159	-0.423433	0.222711	0.239904	0.504385
9X30XG7V4FKKkJQ5e4	ILMN_2807084	ACOT7	1.01263	0.781036	0.998485	-1.06848	0.366	0.899257	-1.04709	0.285708	0.998969	-1.0349	0.223617	0.748838	0.478504	0.161808	-0.116797	0.747964	-0.199117	0.581294
fiJ677uC74uku9XOlQ	ILMN_2632264	ACOT7	1.00043	0.989014	0.998485	-1.03425	0.505153	0.920051	-1.01461	0.657745	0.998969	1.03834	0.117499	0.639179	0.161972	0.654836	0.0944737	0.795173	-0.391	0.263891
N7TRTdaGThfRCQwtTo	ILMN_2606180	ACOT7	1.02189	0.608527	0.998485	-1.06431	0.352717	0.898965	-1.01233	0.668971	0.998969	-1.00486	0.879913	0.985741	0.397278	0.255614	0.242851	0.499001	0.631015	0.0504193
ubR6NHU7r9OVT1iWFE	ILMN_2738629	ACOT8	-1.00596	0.861431	0.998485	-1.01036	0.68699	0.957087	-1.02307	0.319378	0.998969	1.00246	0.897656	0.988129	0.375255	0.285282	-0.159216	0.66041	0.137147	0.70557
fe5Uoq7jWPgl0rtIiw	ILMN_2983587	ACOT8	-1.02011	0.750196	0.998485	1.00073	0.971719	0.996149	-1.01819	0.50231	0.998969	1.00185	0.937534	0.993628	0.099695	0.784072	-0.143126	0.713357	-0.495629	0.145182
KkarpuafvSNJiwHrE4	ILMN_1252618	ACOX2	1.03546	0.0969147	0.998485	NA	NA	NA	NA	NA	NA	NA	NA	NA	-0.654235	0.0401395	NA	NA	NA	NA
xFB6szfrd6rKh6d3oQ	ILMN_2949844	ACOX3	1.04366	0.287156	0.998485	-1.03418	0.279092	0.891024	-1.03077	0.465593	0.998969	1.01148	0.670378	0.942462	0.0877059	0.809612	0.0301999	0.933998	0.0417601	0.908809
xOEX3vnre3SK_qe36o	ILMN_2887075	ACP2	1.05268	0.267553	0.998485	-1.06735	0.0107115	0.844109	-1.00149	0.944876	0.998969	1.02694	0.343166	0.831052	-0.471575	0.168844	-0.215843	0.549233	-0.472456	0.199059
HU6B3FJFCDcKLr_5B0	ILMN_1242352	ACP6	-1.04886	0.0432127	0.998485	1.1052	0.00258778	0.809936	-1.01196	0.656707	0.998969	1.05553	0.0150465	0.384563	0.11231	0.757396	-0.463296	0.177489	-0.162411	0.65395
T5JwZbr16vBrn729ZI	ILMN_1254634	ACPL2	-1.01757	0.629248	0.998485	1.0742	0.149847	0.866502	-1.0935	0.0618676	0.998969	-1.07326	0.0358893	0.484844	-0.230105	0.522461	0.282143	0.429641	-0.0480708	0.895088
rfOfXr_LX3lL_dLNvk	ILMN_2602125	ACRBP	1.0475	0.0937858	0.998485	NA	NA	NA	NA	NA	NA	NA	NA	NA	0.317939	0.370652	NA	NA	NA	NA
rWlcUTUgupT3UG4fdQ	ILMN_2686611	ACSBG1	1.00551	0.849643	0.998485	-1.06808	0.274119	0.890909	-1.03563	0.307168	0.998969	1.00405	0.892577	0.987181	-0.447444	0.194757	0.284762	0.425184	-0.0738872	0.839251
xrogeoVFOA_AadGveg	ILMN_2788036	ACSBG1	1.0428	0.377962	0.998485	-1.07771	0.249377	0.883779	-1.00204	0.96378	0.998969	1.01997	0.51193	0.900776	0.188391	0.602211	0.323807	0.361385	-0.0387529	0.915355
rLi9XQVSnj7UJUrhXg	ILMN_2658654	ACSF3	-1.00687	0.803838	0.998485	-1.00312	0.879232	0.982265	1.00269	0.908653	0.998969	-1.03658	0.0940945	0.606659	-0.321004	0.365797	-0.144151	0.691142	0.206691	0.566689
xujnEL3t17.3B4qvKE	ILMN_2622671	ACSL1	1.06289	0.314636	0.998485	1.00348	0.927826	0.993023	1.00428	0.899552	0.998969	-1.01368	0.578892	0.91678	0.0941073	0.795954	0.363596	0.301704	0.0858384	0.813606
KfHvx1_B_e4p0r6X4E	ILMN_3061300	ACSL3	NA	NA	NA	NA	NA	NA	-1.01912	0.358484	0.998969	-1.00966	0.646983	0.937589	NA	NA	NA	NA	-0.275415	0.441188
6qWKQHU9dM8DVp7x90	ILMN_3138743	ACSL3	1.13153	0.0340175	0.998485	1.02224	0.585827	0.939093	1.01865	0.434468	0.998969	-1.01042	0.74156	0.95988	0.0259639	0.943242	0.45514	0.186256	-0.123654	0.733605
0UBG8KhSojlHlVeD.Q	ILMN_3136205	ACSL4	-1.03863	0.17006	0.998485	1.03169	0.475607	0.915974	-1.01186	0.554878	0.998969	-1.01821	0.464482	0.886882	-0.272034	0.447041	-0.740825	0.0142393	0.33614	0.342295
fPiYOzqpAwDmnd4.U8	ILMN_1244872	ACSL4	1.00449	0.813423	0.998485	-1.045	0.0186817	0.865421	-1.0054	0.818647	0.998969	-1.02413	0.144435	0.675683	-0.00966917	0.978851	-0.154759	0.669457	-0.181638	0.615518
KteL6gQJHupCtjkOXk	ILMN_2892222	ACSL5	-1.00539	0.939937	0.998485	1.00484	0.955199	0.994812	1.03969	0.292736	0.998969	-1.06932	0.0408863	0.497378	-0.309565	0.384075	0.243392	0.498014	0.447142	0.195095
fVYXuaG1H.XH5fyRE4	ILMN_2621697	ACSL6	1.069	0.105172	0.998485	-1.02626	0.526811	0.927455	1.04331	0.208747	0.998969	-1.02402	0.340877	0.829173	-0.521617	0.122022	-0.356415	0.312064	0.0207593	0.954609
0gJT3o4TrjnqgICaHk	ILMN_1236666	ACSL6	1.07512	0.391853	0.998485	1.01106	0.831371	0.977477	-1.01936	0.573652	0.998969	1.00174	0.948811	0.9958	0.146792	0.685722	0.512315	0.130028	-0.405083	0.245529
QbuCdSipW3S1jgf5JA	ILMN_3125814	ACSL6	1.02317	0.496955	0.998485	-1.0489	0.415689	0.906111	1.01827	0.5968	0.998969	1.03558	0.304602	0.802678	-0.449675	0.192271	0.112043	0.75796	-0.205835	0.568332
Bbp4sy8e5X_A6XK.co	ILMN_2628174	ACSS1	1.03244	0.496289	0.998485	-1.03192	0.410823	0.906111	-1.0332	0.497982	0.998969	-1.00222	0.954659	0.99602	-0.671083	0.0336347	0.211824	0.556873	-0.116514	0.748558
lX5I6yT7cUvr0t1Moc	ILMN_2734181	ACSS2	1.07963	0.138955	0.998485	-1.11645	0.0567969	0.865421	-1.06576	0.102551	0.998969	-1.00674	0.83113	0.979453	-0.348857	0.323163	0.222098	0.537425	-0.0413727	0.909652
9WUeSWmXv.huxMj4ds	ILMN_2738825	ACTA1	-1.13383	0.0535898	0.998485	1.00106	0.98556	0.997958	-1.03703	0.328009	0.998969	-1.04234	0.256636	0.772404	0.191536	0.596051	-0.447161	0.195075	0.334301	0.345108
Tqo4JUiQiKjXhngs1g	ILMN_2710354	ACTA2	1.04634	0.159477	0.998485	-1.09232	0.201721	0.875854	1.02804	0.522724	0.998969	1.03957	0.154885	0.686744	-0.528795	0.143265	-0.055444	0.879088	0.166942	0.644822
oSE7nFfB_yV6XJBHj0	ILMN_2923445	ACTA2	-1.00917	0.816839	0.998485	-1.19065	0.0213365	0.865421	1.01955	0.674795	0.998969	1.03677	0.364323	0.840711	-0.472316	0.168084	0.0937077	0.810492	0.209278	0.561734
u_6NJl1L1.UDT15UCc	ILMN_2693895	ACTA2	-1.06705	0.500112	0.998485	-1.3416	0.0371843	0.865421	-1.04535	0.724499	0.998969	1.01945	0.790639	0.969995	-0.551224	0.0986159	-0.0499192	0.898516	-0.0654556	0.857428
36qOCVIkIio14Z4LNY	ILMN_2710353	ACTA2	-1.02317	0.46897	0.998485	-1.07273	0.211205	0.882971	1.01055	0.753618	0.998969	1.01882	0.512129	0.900776	-0.27678	0.438833	-0.243426	0.497954	-0.0925653	0.79924
H1FZiRJ9.knX2_WtRE	ILMN_2617433	ACTB	1.05789	0.498071	0.998485	1.0881	0.202701	0.875854	1.07999	0.191773	0.998969	1.06079	0.0956003	0.608163	-0.249497	0.486948	-0.0718677	0.843599	-0.302276	0.395949
B2bU5Xi1FWqCuEk_fc	ILMN_1377923	ACTB	1.0447	0.595197	0.998485	1.00739	0.891883	0.984584	1.0527	0.318126	0.998969	-1.00931	0.786907	0.969149	-0.280843	0.431861	0.0508389	0.889077	-0.0875841	0.809873
QWlXU25FkLn3KaHvHg	ILMN_2698799	ACTB	-1.03569	0.602491	0.998485	1.07414	0.346416	0.898965	1.04071	0.38727	0.998969	1.02354	0.513157	0.900776	-0.176948	0.624821	0.28732	0.420854	-0.177211	0.624297
NrgphJL6_iQE1VAvcQ	ILMN_2846865	ACTB	1.00948	0.984183	0.998485	1.02227	0.872554	0.982265	1.07358	0.502194	0.998969	NA	NA	NA	-0.575487	0.0817298	-0.0606254	0.867868	-0.251067	0.484121
0a4KYSS_vokBNVQL3E	ILMN_2588055	ACTB	1.07333	0.879913	0.998485	1.04919	0.690422	0.95723	1.05207	0.620871	0.998969	NA	NA	NA	-0.594685	0.0697817	-0.0575117	0.874608	-0.229284	0.523987
Hr66Dx3s_ELELx5c58	ILMN_1254256	ACTL6A	-1.00243	0.951557	0.998485	1.01316	0.687252	0.957087	-1.01368	0.734728	0.998969	1.00805	0.760293	0.963465	-0.72363	0.017995	0.082078	0.821659	0.149447	0.680288
036XR6kT1JI7o3UBKA	ILMN_2985428	ACTL6B	-1.07307	0.359675	0.998485	1.14344	0.115442	0.865421	-1.0396	0.163255	0.998969	1.02396	0.362629	0.840364	0.398173	0.254447	0.250419	0.485287	0.00100425	0.997803
HDFbUVTUaIBlIqm9xQ	ILMN_2696182	ACTL6B	1.00661	0.881241	0.998485	1.16596	0.0610636	0.865421	-1.03031	0.183799	0.998969	1.04291	0.0876193	0.598964	0.292703	0.411806	-0.23857	0.50683	0.440296	0.202853
9kBO0LWJQF5FSx07aI	ILMN_2707416	ACTL6B	1.06592	0.324597	0.998485	1.08381	0.0289895	0.865421	-1.03287	0.253052	0.998969	1.04503	0.0339786	0.477472	0.6359	0.0481255	0.233416	0.516324	-0.00788213	0.982759
E4rqpnbf4T6d.dLWJ4	ILMN_1237413	ACTL6B	1.00726	0.83807	0.998485	1.03571	0.214308	0.883043	-1.02069	0.332958	0.998969	1.0137	0.525835	0.902691	0.557263	0.0942227	-0.133581	0.71295	-0.298299	0.402501
Wqsrqx3TSKRPrk7u.k	ILMN_2844996	ACTN1	-1.02566	0.639138	0.998485	1.15542	0.220257	0.88352	1.01365	0.771577	0.998969	1.06043	0.157039	0.688434	0.390484	0.264577	0.00742291	0.983763	0.0221584	0.951552
on22Inl1o0pUseTQiA	ILMN_2797061	ACTN2	1.03876	0.342539	0.998485	1.24502	0.0476739	0.865421	1.01244	0.774439	0.998969	1.07436	0.0342326	0.477472	-0.3194	0.368333	-0.300902	0.398205	-0.545041	0.103246
ND0KXl00l6nOG6IOFo	ILMN_2672767	ACTN4	1.0581	0.0477868	0.998485	-1.06562	0.0411339	0.865421	1.02267	0.317719	0.998969	1.02384	0.405659	0.860197	-0.381317	0.276939	-0.347431	0.32528	-0.17562	0.627462
uSESESeNK02XX0K16Q	ILMN_2673599	ACTN4	1.12231	0.0266056	0.998485	1.09766	0.2361	0.883779	-1.01542	0.764114	0.998969	-1.07251	0.0058597	0.280554	0.0087439	0.980874	-0.245661	0.49389	0.0267809	0.941459
0VegOO.juqAmQUWeOA	ILMN_1233481	ACTR10	-1.05188	0.151372	0.998485	-1.01003	0.750204	0.967728	-1.01442	0.598713	0.998969	1.03614	0.233644	0.757829	0.587144	0.074329	-0.876667	0.000870022	0.162753	0.65326
uetRjsw9cu4wAiek7c	ILMN_2703354	ACTR10	1.01513	0.508822	0.998485	NA	NA	NA	1.01079	0.751126	0.998969	NA	NA	NA	0.116341	0.74892	NA	NA	0.127258	0.726087
HdmCUf5euqVLsfAwLY	ILMN_2728697	ACTR1A	1.03012	0.738072	0.998485	1.05935	0.13964	0.865421	-1.02508	0.587001	0.998969	-1.00751	0.809593	0.975109	-0.391024	0.263858	-0.359516	0.307567	0.243658	0.497531
f0q64pEuu.jnl1396U	ILMN_3161327	ACTR1B	1.03119	0.615353	0.998485	-1.00622	0.90774	0.988054	1.0297	0.495533	0.998969	-1.04611	0.202715	0.730075	0.51799	0.125106	-0.0435675	0.911385	-0.230316	0.52207
lj3ksnfwCRJr6MkJ4c	ILMN_2851875	ACTR3	1.01972	0.79518	0.998485	1.03708	0.621446	0.947286	1.00825	0.913091	0.998969	-1.04381	0.355526	0.836001	-0.0375896	0.917889	0.446055	0.196316	-0.244494	0.496009
Euf02UuqUpGt9UsCU8	ILMN_2933346	ACTR3B	1.025	0.554919	0.998485	1.11367	0.115855	0.865421	1.03107	0.313946	0.998969	-1.03482	0.187776	0.716078	0.0659534	0.856353	-0.123351	0.734239	-0.215186	0.550478
lUClPShFevSBv9fFro	ILMN_2651496	ACTR5	-1.00162	0.950215	0.998485	1.01436	0.535689	0.929613	NA	NA	NA	1.01954	0.318689	0.814708	-0.0617551	0.865425	0.146852	0.6856	NA	NA
TR8deoK6gvjN4AY4f4	ILMN_2593338	ACTR6	1.00827	0.672179	0.998485	NA	NA	NA	1.02161	0.39395	0.998969	NA	NA	NA	-0.0719708	0.843377	NA	NA	0.441041	0.202
6QGe6qgOTffaDzU8bk	ILMN_2660103	ACVR1	1.00851	0.834558	0.998485	1.02209	0.615821	0.945942	-1.04478	0.237982	0.998969	1.01508	0.54613	0.907926	-0.429028	0.216005	-0.156495	0.665929	0.356769	0.34594
6b.i.sNLHh3vs5NfUY	ILMN_2614086	ACVR1C	-1.00668	0.897832	0.998485	-1.0076	0.794844	0.973867	-1.01136	0.635535	0.998969	-1.02948	0.206688	0.733731	-0.660936	0.0374594	0.684474	0.0290055	-0.399178	0.253139
N.kqT.Lv6.EsLkg6kg	ILMN_2617775	ACVR2A	1.0112	0.617739	0.998485	NA	NA	NA	-1.00402	0.884506	0.998969	NA	NA	NA	-0.299795	0.400029	NA	NA	-0.231268	0.520302
NK2tBpHF2h7dt3euF0	ILMN_1230145	ACVR2B	1.01217	0.854882	0.998485	1.02432	0.566393	0.934588	-1.07344	0.100394	0.998969	1.03972	0.218751	0.743031	-0.268168	0.45378	-0.0215267	0.952932	-0.448415	0.193673
utcUeUKN79V5UsMCUk	ILMN_2945472	ACY1	-1.01422	0.803624	0.998485	1.02099	0.742076	0.96687	1.03408	0.260429	0.998969	1.04393	0.0768946	0.586444	-0.451188	0.190594	-0.559837	0.0923892	-0.472593	0.167799
xiCRuk9eC3iCNKtEuU	ILMN_1240165	ACY3	-1.03296	0.228295	0.998485	NA	NA	NA	NA	NA	NA	1.00327	0.857081	0.984525	-0.249308	0.517689	NA	NA	NA	NA
9fI0UMNU5UTjJcSsyE	ILMN_1242772	ADAL	1.0134	0.701189	0.998485	-1.01769	0.560778	0.932478	-1.02791	0.338257	0.998969	1.00322	0.898067	0.988235	-0.30492	0.39162	-0.0989251	0.785707	-0.106377	0.769915
6r3q6AkCgOgQpGKJCU	ILMN_2948663	ADAL	-1.01234	0.540754	0.998485	-1.02126	0.417687	0.907144	-1.0264	0.353896	0.998969	-1.00113	0.953153	0.99602	0.0128763	0.973772	-0.309138	0.384765	0.177933	0.622862
ilR5cnTh3tUh7fY9QE	ILMN_1255996	ADAM11	1.0455	0.437244	0.998485	-1.06568	0.0142935	0.865421	1.0178	0.614926	0.998969	-1.02456	0.362575	0.840364	-0.668637	0.0345312	-0.524773	0.119377	0.0790751	0.828101
QiydV6F0agqnjcT.d0	ILMN_2812954	ADAM11	-1.01471	0.685062	0.998485	NA	NA	NA	NA	NA	NA	1.0144	0.548025	0.908736	0.225812	0.530463	NA	NA	NA	NA
Hkk32dxd4XeiP6eXX0	ILMN_3139103	ADAM15	-1.03396	0.580289	0.998485	1.00195	0.952253	0.994451	1.0297	0.619788	0.998969	-1.00947	0.731736	0.957813	0.0841957	0.817122	0.233627	0.515933	0.273698	0.444156
cnSpM9zJ7pPjjF5dLQ	ILMN_2594718	ADAM17	1.00982	0.696362	0.998485	-1.02325	0.357821	0.899257	-1.03625	0.170014	0.998969	1.03897	0.107075	0.622964	-0.730243	0.016478	0.163185	0.652389	-0.162468	0.653835
Hg.3.j_oj70SgstdV0	ILMN_2772155	ADAM19	-1.00828	0.8311	0.998485	-1.05058	0.112694	0.865421	1.02343	0.284591	0.998969	1.02575	0.311308	0.807012	-0.373134	0.288233	0.446228	0.196121	0.0571129	0.875472
caRT.LnpXTfKDB5eq8	ILMN_3134632	ADAM22	-1.01512	0.521793	0.998485	1.04859	0.0917126	0.865421	1.03154	0.191363	0.998969	-1.00058	0.973496	0.997506	0.435961	0.240781	0.15008	0.678996	-0.505022	0.136525
Nl6Y6Yd.8yYf11aKSQ	ILMN_3057562	ADAM22	-1.09231	0.0164482	0.986074	-1.01721	0.49383	0.919149	1.00725	0.737114	0.998969	-1.01467	0.385993	0.851774	-0.218667	0.543889	0.658506	0.0384167	-0.697519	0.0249335
ETP0hN7gDqIXZLB16Q	ILMN_2759398	ADAM22	-1.007	0.721807	0.998485	NA	NA	NA	NA	NA	NA	NA	NA	NA	-0.0823359	0.821106	NA	NA	NA	NA
Bp5e4GiPe018Rk3.L4	ILMN_1230599	ADAM23	1.05122	0.307333	0.998485	-1.06586	0.22674	0.883779	-1.00135	0.970995	0.998969	-1.03434	0.349979	0.833567	-0.330834	0.350444	0.595057	0.0695619	0.298577	0.402041
fUUN0wynU2euU16ySc	ILMN_1213123	ADAM23	1.06366	0.0596286	0.998485	1.03635	0.24944	0.883779	1.0511	0.225875	0.998969	-1.04151	0.0901638	0.604039	-0.348649	0.323471	-0.306543	0.388975	0.074049	0.838903
9l0jeIPqOqxCECtX.o	ILMN_1242144	ADAM23	-1.00445	0.899589	0.998485	1.01002	0.71914	0.961735	-1.00023	0.993626	0.999288	1.00254	0.92481	0.991652	0.624791	0.0534453	0.27916	0.434742	0.272607	0.446046
ZMVepLuTWui.p1NNHo	ILMN_2709760	ADAM33	-1.01785	0.485838	0.998485	NA	NA	NA	NA	NA	NA	NA	NA	NA	0.472239	0.168162	NA	NA	NA	NA
31zJeBPqqSKRMNHOAU	ILMN_2965752	ADAM34	-1.01393	0.533396	0.998485	-1.00734	0.725017	0.963155	1.00859	0.64038	0.998969	-1.00071	0.965717	0.997417	0.350163	0.32123	-0.46931	0.171184	-0.230382	0.521947
xoJLr9fIwcSDzHrd6g	ILMN_2649502	ADAM9	-1.02096	0.558557	0.998485	-1.0047	0.953035	0.994698	-1.01102	0.91046	0.998969	-1.06386	0.0365968	0.486845	0.209875	0.58783	0.503209	0.13817	-0.152871	0.6733
iJNu55Squi55xrHotA	ILMN_3112856	ADAMTS13	-1.00546	0.785225	0.998485	1.00639	0.838471	0.978332	1.01332	0.457274	0.998969	1.02087	0.403246	0.85886	0.262706	0.463376	-0.09143	0.80166	0.127478	0.72563
BJ007yoop6CiVJugto	ILMN_3161887	ADAMTS15	1.01974	0.412015	0.998485	NA	NA	NA	NA	NA	NA	NA	NA	NA	0.414744	0.233359	NA	NA	NA	NA
ZrtXoC4q1XsMgNLQqk	ILMN_2987834	ADAMTS16	1.0139	0.613992	0.998485	NA	NA	NA	NA	NA	NA	NA	NA	NA	-0.0960902	0.791733	NA	NA	NA	NA
9gitW3XBeNXYaUJezs	ILMN_2729103	ADAMTS2	-1.01946	0.496484	0.998485	NA	NA	NA	-1.00991	0.684332	0.998969	1.03045	0.223513	0.748838	-0.620823	0.0554359	NA	NA	0.209805	0.560726
iOd._i0hA7q8z3pVk0	ILMN_1230152	ADAMTS4	-1.01785	0.650683	0.998485	-1.05851	0.292665	0.891024	1.00906	0.647995	0.998969	-1.03241	0.128449	0.658439	-0.420528	0.22624	0.33657	0.341639	-0.138256	0.703281
ECofdI6JRXnmgnkTkc	ILMN_2650115	ADAMTSL2	-1.04653	0.164439	0.998485	1.02287	0.548166	0.931317	1.04385	0.0369849	0.998969	1.00664	0.813143	0.975847	0.670953	0.033682	0.0795925	0.82699	0.343885	0.330576
rq4AIgG0kwhNclUtlE	ILMN_2459899	ADAMTSL4	-1.02514	0.448403	0.998485	-1.10927	0.186805	0.875854	1.00049	0.981029	0.998969	-1.01679	0.431572	0.87274	-0.593155	0.0706889	-0.117201	0.747115	-0.101996	0.779191
o0OR5iSVj1HF5K6f1Q	ILMN_2632832	ADAP1	1.14428	0.0168785	0.993457	-1.02482	0.378052	0.899257	1.05875	0.0788027	0.998969	1.00302	0.907975	0.989392	-0.206471	0.567111	-0.0363008	0.920697	-0.0330153	0.927858
xVUlePnnpKUsvAnF7M	ILMN_1224713	ADAP1	1.06199	0.198244	0.998485	-1.01883	0.776037	0.972372	1.04283	0.327627	0.998969	-1.05632	0.152058	0.682017	-0.0852477	0.81487	0.343682	0.330881	0.474933	0.165412
6Uq7r41xh1W519SQHc	ILMN_2589256	ADAP2	NA	NA	NA	NA	NA	NA	NA	NA	NA	-1.00929	0.540811	0.906132	NA	NA	NA	NA	NA	NA
oxQgef3_o.YrqtSULU	ILMN_2704372	ADAR	1.04686	0.047561	0.998485	-1.01127	0.59181	0.939387	1.02501	0.157209	0.998969	NA	NA	NA	-0.534131	0.138524	-0.187733	0.603505	0.173615	0.63146
uCIkK7V4ve6H4VWTVE	ILMN_3021272	ADAR	1.0163	0.765287	0.998485	-1.02477	0.403967	0.905432	-1.05368	0.220258	0.998969	-1.097	3.82282e-05	0.0399936	0.227724	0.526892	0.00774806	0.983052	0.166678	0.645354
xWxTtey4QDXGeg7nqU	ILMN_3093622	ADAR	1.04167	0.0928964	0.998485	-1.00869	0.599819	0.940892	-1.00283	0.861784	0.998969	1.01498	0.459597	0.884868	-0.37052	0.291893	-0.215275	0.550309	0.25401	0.478837
leTifXRFCVJaR4k4jk	ILMN_3105343	ADARB1	1.02189	0.664364	0.998485	-1.08498	0.312839	0.893373	-1.04259	0.320227	0.998969	1.00548	0.905169	0.989293	-0.2277	0.526938	0.303901	0.426587	0.0959878	0.80595
lZRE.Vd_JxUuFn8zdI	ILMN_1243711	ADARB1	-1.01584	0.543561	0.998485	1.00595	0.743605	0.967206	-1.01866	0.275254	0.998969	-1.03012	0.156732	0.688434	0.00068034	0.998512	-0.115449	0.750794	0.269033	0.483921
xUXNyL.TV08006hTT8	ILMN_3036678	ADARB1	-1.03849	0.288235	0.998485	1.0119	0.635236	0.949555	-1.00981	0.574228	0.998969	-1.03572	0.124115	0.65056	0.409559	0.239848	-0.62009	0.0558093	0.481316	0.159002
0YbJJwV78HtFyiIkdI	ILMN_1256624	ADAT1	NA	NA	NA	NA	NA	NA	NA	NA	NA	1.00188	0.921634	0.991652	NA	NA	NA	NA	NA	NA
lFiJZ4bZ60b8zvPHu4	ILMN_2705097	ADAT2	-1.04698	0.232479	0.998485	-1.02604	0.366335	0.899257	-1.01794	0.324868	0.998969	-1.0025	0.913673	0.991054	0.0994936	0.784499	0.200619	0.578386	-0.0059002	0.987094
ufRnqGFR4VOnlyr6e4	ILMN_2656440	ADCK1	1.03977	0.152768	0.998485	1.00915	0.813019	0.976557	1.0216	0.536103	0.998969	1.00432	0.876647	0.985484	-0.0376834	0.917685	-0.439368	0.203919	0.212818	0.554978
E_jf6lXovJ1eNcLiQU	ILMN_1214631	ADCK4	1.00462	0.852929	0.998485	1.07465	0.0586806	0.865421	1.02808	0.325457	0.998969	-1.01909	0.46786	0.888147	0.0581344	0.87326	0.572051	0.0839986	-0.0802018	0.825683
fegNclOadFldOebves	ILMN_2918317	ADCK5	1.04748	0.378187	0.998485	1.01039	0.770546	0.970878	1.01606	0.622738	0.998969	1.00438	0.874638	0.985484	-0.153929	0.671146	0.110289	0.761656	0.0555221	0.878919
BqMirk6ECqk.zVEYxE	ILMN_2859960	ADCY1	-1.08769	0.137053	0.998485	-1.00047	0.996904	0.999406	1.13362	0.0914598	0.998969	-1.09725	0.13154	0.662723	0.880452	0.000771689	0.134407	0.711239	0.296291	0.405828
QniHZp.7Rfnu_37pJI	ILMN_2883063	ADCY2	1.06587	0.318514	0.998485	1.07801	0.501299	0.919326	1.03628	0.308549	0.998969	-1.01834	0.621057	0.932256	-0.0377241	0.917596	0.0765145	0.833601	0.248824	0.488164
Hd7Fx9eBEheGaFo3V0	ILMN_1250417	ADCY4	-1.01821	0.507545	0.998485	-1.0284	0.310065	0.892493	1.01796	0.451455	0.998969	1.04999	0.0465589	0.510085	-0.67024	0.0339422	-0.140925	0.697777	-0.285375	0.424145
WDdTsUNroUepn48lCk	ILMN_1249888	ADCY6	-1.05464	0.192286	0.998485	1.00693	0.875763	0.982265	-1.00407	0.91455	0.998969	1.0258	0.32344	0.817104	0.573421	0.083089	-0.376522	0.283527	-0.0342535	0.925158
QKNI_nkqEi9woOqdMk	ILMN_3163572	ADCY7	1.01941	0.337925	0.998485	1.01214	0.633014	0.949555	-1.00736	0.706299	0.998969	1.01689	0.35023	0.833567	0.352518	0.317761	-0.248762	0.488275	0.215356	0.550156
9gSQ9qTTQiU8QWmh.k	ILMN_2607127	ADCY8	-1.05903	0.304372	0.998485	-1.20264	0.0290805	0.865421	-1.11714	0.00679296	0.998969	-1.09544	0.0174548	0.39614	-0.117036	0.747461	0.243331	0.528102	-0.206626	0.593755
lS4HSQnQ7dAi7uKSZY	ILMN_2723474	ADCY9	1.00377	0.949314	0.998485	1.07469	0.287129	0.891024	1.00653	0.872172	0.998969	-1.06992	0.0219928	0.432703	0.0222301	0.951396	0.0545359	0.881057	0.199325	0.580891
HXX1xX5XTk_.yLT_U8	ILMN_1227605	ADCYAP1	1.0306	0.598707	0.998485	-1.06116	0.229304	0.883779	-1.02593	0.358559	0.998969	-1.03273	0.185407	0.71497	-0.41806	0.229262	0.269136	0.452088	0.280128	0.433085
rqLuq55fnZ7zPCyCi8	ILMN_1243799	ADCYAP1R1	1.03187	0.148877	0.998485	1.03294	0.103209	0.865421	1.00833	0.69296	0.998969	-1.00527	0.770658	0.965462	-0.31855	0.369681	-0.220419	0.540584	0.266107	0.45739
BpFCSpVEl35HnLdFLQ	ILMN_3033533	ADD1	1.03769	0.521946	0.998485	1.0498	0.46845	0.915057	-1.06394	0.103525	0.998969	-1.04137	0.126829	0.655155	-0.0203096	0.955591	-0.399293	0.252989	-0.0805938	0.824842
cfHqt_j1TfKgSMUoq4	ILMN_3107228	ADD1	1.01561	0.838078	0.998485	1.01421	0.833355	0.977763	1.04829	0.405499	0.998969	-1.05865	0.133795	0.664813	0.252477	0.481586	-0.0737928	0.839454	-0.377354	0.282379
0kj5I.Th5i7FA7cVpI	ILMN_2659062	ADD1	NA	NA	NA	NA	NA	NA	1.01248	0.582422	0.998969	NA	NA	NA	NA	NA	NA	NA	-0.232814	0.517437
WSPkj9OHmLsUDtxWkk	ILMN_2659063	ADD1	NA	NA	NA	NA	NA	NA	1.00538	0.823721	0.998969	1.01081	0.660729	0.939772	NA	NA	NA	NA	-0.341945	0.333491
TtcTTe77nEG7ohEvF4	ILMN_2901284	ADD3	1.04079	0.514489	0.998485	1.01574	0.705771	0.960023	-1.07943	0.0519197	0.998969	1.02188	0.59282	0.922697	-0.672156	0.0332468	0.131435	0.717401	-0.112611	0.756764
ZUYugsCZXmrh_kZAbg	ILMN_2901283	ADD3	1.00559	0.922962	0.998485	1.03994	0.179308	0.875762	-1.02413	0.493755	0.998969	1.01666	0.566951	0.914342	-0.229037	0.524447	-0.0423903	0.907438	-0.0562987	0.877236
Khnk3v0QPS3QHS0WSI	ILMN_2588671	ADD3	-1.01047	0.758622	0.998485	-1.01782	0.549368	0.931317	1.00035	0.990254	0.998969	-1.02705	0.221626	0.746484	-0.153537	0.671944	0.543497	0.104423	-0.332732	0.347518
rVHcTVEu6IOQv_3g1w	ILMN_1242178	ADH5	1.04712	0.252527	0.998485	1.00019	0.997549	0.999406	-1.02851	0.325975	0.998969	1.06502	0.0155398	0.386493	0.263326	0.462282	-0.400183	0.251834	-0.00375539	0.991785
6lVPqCqCUsHuXfAXeM	ILMN_2675064	ADHFE1	-1.00374	0.904762	0.998485	-1.02812	0.424951	0.909187	-1.0279	0.283666	0.998969	1.01079	0.637567	0.93529	-0.148761	0.681692	-0.391652	0.263024	-0.0365351	0.920186
ZdUjfyu3vruCc5deQg	ILMN_3143557	ADI1	1.05623	0.0584678	0.998485	-1.09434	0.229573	0.883779	1.00045	0.989758	0.998969	-1.01533	0.625906	0.933192	0.311735	0.414144	-0.356404	0.346469	-0.340567	0.335571
QF61Tf3KEBAlGX47JU	ILMN_1213531	ADIPOR1	1.05494	0.245322	0.998485	1.01833	0.507875	0.920144	-1.01372	0.672417	0.998969	-1.00239	0.939491	0.993628	0.224697	0.532548	0.49112	0.149454	-0.156144	0.666642
ZqjTIK_q9SApN3uOvU	ILMN_1260219	ADIPOR2	1.05487	0.360712	0.998485	-1.01656	0.815342	0.976634	-1.04091	0.363612	0.998969	1.05021	0.16576	0.696701	-0.299187	0.401033	-0.164825	0.649082	0.17636	0.625989
fUvfQoJfjobTl874zU	ILMN_2702471	ADK	1.00153	0.978437	0.998485	-1.08679	0.227561	0.883779	-1.06145	0.071353	0.998969	1.01037	0.754811	0.962071	0.0679939	0.851949	-0.580965	0.1009	-0.850374	0.00367396
NO59ITeOh_qSeXBWQQ	ILMN_2986899	ADK	-1.033	0.483978	0.998485	-1.10228	0.0786319	0.865421	-1.0083	0.735474	0.998969	1.01666	0.564697	0.914342	-0.307189	0.387925	-0.307093	0.388081	0.136997	0.705881
rXJIJ_FeYyzoX_hIfI	ILMN_2805261	ADNP	1.06931	0.0864905	0.998485	1.05846	0.214783	0.883043	-1.00226	0.951661	0.998969	1.0294	0.361804	0.840031	-0.39258	0.261794	0.64267	0.0450637	-0.369298	0.293611
lp47wIs6fcq4uK6dJo	ILMN_3143358	ADORA1	1.01605	0.817538	0.998485	-1.05333	0.235905	0.883779	1.09252	0.03397	0.998969	-1.00327	0.929128	0.991937	0.368609	0.294583	-0.601312	0.0659384	-0.158197	0.662475
Q9L6KwrtXp3QooVztw	ILMN_1254016	ADORA1	1.0086	0.870205	0.998485	-1.02922	0.569845	0.935668	1.03334	0.593966	0.998969	-1.02989	0.511027	0.900776	-0.285129	0.457067	-0.247426	0.49069	-0.0980013	0.787669
Zl6LxELenhOQPop1uk	ILMN_1244424	ADORA2B	-1.03828	0.137812	0.998485	-1.03498	0.170528	0.870618	1.01204	0.5734	0.998969	1.04195	0.0607311	0.552474	0.233424	0.51631	0.0371303	0.918889	0.13747	0.704903
9gFXqInOJReFPeR_fo	ILMN_2633148	ADPGK	-1.05885	0.0804259	0.998485	-1.05349	0.110473	0.865421	-1.00508	0.815753	0.998969	1.00334	0.844817	0.983793	0.552389	0.0977585	-0.055065	0.888106	0.426808	0.218651
WjqtJ.1T0gF0wX7PUs	ILMN_2595704	ADPRH	-1.02618	0.555779	0.998485	-1.03433	0.305433	0.891024	-1.02277	0.582134	0.998969	1.02948	0.376673	0.846758	0.399055	0.253299	-0.186927	0.605088	0.324797	0.359834
6CCtoieehShuuJYigs	ILMN_2639063	ADPRHL2	-1.00987	0.649958	0.998485	1.0121	0.462913	0.914237	NA	NA	NA	NA	NA	NA	0.2238	0.53423	0.00722439	0.984197	NA	NA
cQXr9x8.ykh7oKXuN4	ILMN_1242170	ADRA2A	1.07556	0.25994	0.998485	1.09502	0.200012	0.875854	-1.16628	0.0732094	0.998969	1.11123	0.0054394	0.280554	-0.368893	0.328585	0.624706	0.0534875	-0.0588674	0.871673
ZXOF4AKTe3qooiMkSk	ILMN_1235741	ADRA2C	1.0093	0.771673	0.998485	1.09891	0.0153	0.865421	1.04082	0.396013	0.998969	1.04111	0.160972	0.690446	-0.685303	0.0287342	-0.0598294	0.87848	0.175399	0.627903
NnSEHAURQgKJEUVX3Y	ILMN_3152476	ADRA2C	1.06439	0.212725	0.998485	1.10224	0.0589714	0.865421	-1.00426	0.881633	0.998969	1.04015	0.12968	0.660233	-0.673734	0.0326812	-0.159812	0.681284	-0.534822	0.111195
fFp5BpqEFHuhJj2Jeg	ILMN_2710611	ADRB1	-1.02921	0.398707	0.998485	1.02634	0.310387	0.892493	-1.00758	0.77892	0.998969	NA	NA	NA	-0.232322	0.518348	0.00941255	0.979412	0.0685828	0.850679
ZofgM17t_hf3nuEOpU	ILMN_1241610	ADRB2	-1.01615	0.550076	0.998485	-1.0003	0.987302	0.998244	-1.02793	0.124243	0.998969	1.00895	0.616632	0.930405	-0.440714	0.202375	0.378564	0.280711	-0.32346	0.36193
uVd_3HR1ypv3_WP.g4	ILMN_3000318	ADRBK1	1.11355	0.0408021	0.998485	-1.02084	0.66097	0.953909	-1.0616	0.110338	0.998969	-1.07623	0.0259217	0.449398	-0.396693	0.25638	0.0819224	0.821993	-0.0648164	0.868419
99Lml_l0oSfpXdO5S8	ILMN_2601590	ADRM1	-1.08257	0.21469	0.998485	1.00082	0.978861	0.997382	-1.02874	0.362452	0.998969	-1.03494	0.1657	0.696701	0.700976	0.0239241	-0.296415	0.405621	0.658486	0.0384248
rOF8yJk1qSOXH0lU1E	ILMN_2597936	ADSL	1.06778	0.0525334	0.998485	-1.00561	0.822358	0.977477	1.00244	0.927888	0.998969	-1.0094	0.713148	0.955244	0.660145	0.0377693	-0.180365	0.618038	0.073047	0.84106
3Ko_le7PXcCedouh9o	ILMN_2957614	ADSS	1.09992	0.0661488	0.998485	-1.07012	0.191569	0.875854	-1.03613	0.21107	0.998969	1.04215	0.275958	0.783355	-0.417868	0.229498	-0.227222	0.527829	0.213181	0.554289
0YhXaS5RQRfQYBLeCc	ILMN_1245079	ADSSL1	1.03139	0.559952	0.998485	-1.08285	0.323252	0.895167	-1.02125	0.464383	0.998969	-1.03712	0.170231	0.702827	-0.432083	0.212392	-0.33153	0.34937	-0.102366	0.778407
KSKX0eHj7ROs7vS_iU	ILMN_2958099	ADSSL1	1.03398	0.542845	0.998485	-1.13086	0.191281	0.875854	1.01668	0.636226	0.998969	-1.06126	0.0298857	0.457255	-0.42389	0.22216	0.0462137	0.899123	0.356333	0.312183
QCV5UPQHCkkXVCXuUk	ILMN_2873822	AEBP1	-1.02027	0.624141	0.998485	-1.05991	0.373141	0.899257	-1.0408	0.370296	0.998969	1.1359	0.000627776	0.120425	0.310151	0.416648	-0.298512	0.402149	0.431351	0.213254
KGmdPFmlEY.fY5EBHo	ILMN_3138674	AEBP2	NA	NA	NA	NA	NA	NA	-1.01326	0.51277	0.998969	1.03783	0.0540349	0.529872	NA	NA	NA	NA	0.477034	0.163286
0VUnWvV0FEAgqhIiAk	ILMN_2808336	AES	-1.01282	0.875067	0.998485	-1.03366	0.39189	0.901856	-1.01822	0.642699	0.998969	-1.05272	0.11589	0.636897	0.493332	0.147349	-0.0769465	0.832673	0.284542	0.425558
uV6Eq8Oh6ANDs9eXnQ	ILMN_1246017	AFAP1L1	-1.0177	0.503924	0.998485	-1.00854	0.715756	0.961735	1.00916	0.640219	0.998969	1.01304	0.566385	0.914342	-0.375283	0.285244	0.32079	0.366134	0.194258	0.590736
Ql06iHeAqpIbje4i.8	ILMN_3154640	AFF1	1.0274	0.315968	0.998485	1.06482	0.0348295	0.865421	-1.01902	0.401688	0.998969	1.01125	0.655031	0.938391	0.26151	0.465489	-0.374199	0.286749	-0.084451	0.816575
NrW7W4t0vNeRQSE38M	ILMN_1251170	AFF4	-1.0319	0.37559	0.998485	-1.01031	0.658295	0.953909	1.0205	0.414753	0.998969	-1.00884	0.674864	0.945567	-0.48494	0.155432	-0.0530058	0.884375	0.0116903	0.974431
uP7IqRaSXIooRNX14o	ILMN_1252760	AFG3L1	-1.00329	0.906636	0.998485	1.00454	0.853769	0.980364	1.01002	0.737003	0.998969	-1.00829	0.723786	0.957615	-0.082441	0.820881	0.402773	0.248491	-0.650496	0.0416899
rIK_kpt16ICC56ICWE	ILMN_2746055	AFG3L1	1.01534	0.599978	0.998485	-1.00737	0.811788	0.976557	-1.00777	0.749767	0.998969	-1.00863	0.711129	0.954815	0.0235191	0.948581	0.122408	0.736208	0.34893	0.357393
WD_yKkWklyKKETV9eI	ILMN_2665422	AFG3L1	1.00147	0.949354	0.998485	1.02372	0.251213	0.883779	1.00041	0.989644	0.998969	1.01265	0.553679	0.910252	-0.391762	0.262878	0.306623	0.388846	-0.0487431	0.893627
KqOl1Pknip9EHkkHlI	ILMN_2691982	AFG3L2	-1.02458	0.41087	0.998485	1.01476	0.502227	0.919326	1.01308	0.59704	0.998969	-1.01322	0.610794	0.929414	0.258539	0.470757	-0.480475	0.159838	0.052463	0.885552
ctGU2Ofnr7ou6NHtKE	ILMN_2818717	AFTPH	1.00114	0.987223	0.998485	1.04425	0.34576	0.898965	-1.06703	0.113284	0.998969	-1.00977	0.718118	0.956494	0.276508	0.439301	0.175763	0.627177	-0.265609	0.458264
fUVEhP2f5_9vTGF_9o	ILMN_3086136	AGAP1	-1.04708	0.344231	0.998485	1.00185	0.974344	0.996352	-1.02232	0.690691	0.998969	-1.02307	0.517664	0.901115	0.271959	0.447172	0.341455	0.33423	-0.422087	0.224342
ufwrXpVTVSAqIrruh8	ILMN_3048728	AGAP2	-1.03292	0.73456	0.998485	1.24856	0.16099	0.869529	1.03219	0.441732	0.998969	1.04158	0.208363	0.73431	0.0290337	0.936542	-0.116506	0.748575	0.0654332	0.857476
c_KJqOfq9KU_ItI16U	ILMN_3124601	AGAP2	1.00138	0.964174	0.998485	NA	NA	NA	-1.00859	0.6868	0.998969	-1.01962	0.383253	0.849422	-0.261397	0.46569	NA	NA	0.096793	0.790238
3c4J0oIqSKhSCh1Gl4	ILMN_2754598	AGAP3	1.01584	0.746032	0.998485	-1.02114	0.570811	0.935668	-1.00479	0.847498	0.998969	1.00131	0.967653	0.997506	0.333222	0.346765	-0.0440519	0.910403	0.211917	0.556695
Q1zgnSgipIqFIKHUaU	ILMN_2754596	AGAP3	1.01556	0.714858	0.998485	1.01913	0.519795	0.926016	-1.00269	0.946995	0.998969	1.00499	0.874177	0.985484	0.366177	0.298027	0.189836	0.599378	0.479361	0.160949
raeB1eviCMktVOUIfY	ILMN_3081260	AGBL4	-1.00697	0.742185	0.998485	1.0038	0.857733	0.980532	-1.0062	0.695024	0.998969	-1.01274	0.596547	0.924789	0.352406	0.317926	0.494578	0.146171	0.430331	0.247603
6kK4oCekoN6HuKIh.4	ILMN_2752600	AGBL5	1.03098	0.201468	0.998485	1.06579	0.0364838	0.865421	1.02269	0.262799	0.998969	-1.00176	0.928877	0.991937	0.273338	0.44478	-0.0738012	0.839436	-0.0249564	0.945442
Eh7hOvkXivVV0f3oSE	ILMN_1231146	AGFG1	1.10366	0.070144	0.998485	-1.05189	0.167113	0.869529	1.00509	0.857088	0.998969	-1.03171	0.375532	0.846547	-0.50422	0.137251	-0.17683	0.625054	-0.207266	0.565585
BVl17Qkfy8le07_jFI	ILMN_2612774	AGFG2	1.07277	0.489338	0.998485	1.06834	0.19347	0.875854	-1.02857	0.445716	0.998969	-1.00988	0.71721	0.956251	-0.659681	0.037952	-0.0730416	0.841071	-0.159356	0.660128
6v7HEi0n_X_v7XJ46I	ILMN_2858324	AGGF1	1.02551	0.527052	0.998485	-1.03388	0.372697	0.899257	-1.0337	0.250552	0.998969	1.03416	0.165016	0.69551	-0.454432	0.187029	0.517265	0.125728	0.511824	0.130459
QhTh_QJxvfujSpJSDo	ILMN_2660898	AGGF1	1.02962	0.470781	0.998485	1.0054	0.772132	0.971436	1.00081	0.962385	0.998969	1.0397	0.117284	0.639068	-0.0655074	0.857316	-0.205009	0.569919	0.495686	0.145129
NI5Q.efVXJdFXlUrLo	ILMN_2666445	AGPAT1	1.03763	0.334541	0.998485	1.0174	0.641749	0.94966	-1.02657	0.24691	0.998969	-1.0201	0.315939	0.812839	-0.310984	0.381783	0.538813	0.108047	0.391176	0.263657
KkmfeIkMAHEcsO6u6k	ILMN_1226540	AGPAT3	-1.01278	0.800232	0.998485	-1.0708	0.23251	0.883779	1.00406	0.945849	0.998969	1.01394	0.547258	0.908197	-0.397209	0.255705	0.427957	0.217279	-0.0263156	0.942474
oq4og6u7r5u5H7hXsE	ILMN_2960714	AGPAT4	-1.0807	0.0572923	0.998485	1.00854	0.849898	0.98028	1.05629	0.0707928	0.998969	1.04665	0.154086	0.685437	0.511847	0.130439	-0.154929	0.66911	0.248101	0.489469
on5J8qnkvvdfTCHlNY	ILMN_1250939	AGPAT5	1.00029	0.99188	0.998928	-1.09703	0.118433	0.865421	1.0325	0.448431	0.998969	-1.04307	0.0489361	0.513829	-0.650177	0.0418242	0.30556	0.390576	0.337137	0.340775
TiJukoQrSJxJ55Uo.w	ILMN_1252335	AGPAT6	1.0269	0.709982	0.998485	1.02537	0.418931	0.90753	-1.01316	0.668539	0.998969	-1.04088	0.200123	0.730075	-0.630379	0.0507232	-0.697636	0.024899	-0.134687	0.71066
TCkpeSpHWSOS0l97X0	ILMN_2918402	AGPAT6	1.01891	0.405473	0.998485	NA	NA	NA	NA	NA	NA	-1.00934	0.625987	0.933192	-0.183271	0.612292	NA	NA	NA	NA
ieA6wBI1PdEqS66ZGU	ILMN_2964996	AGPHD1	-1.01559	0.608128	0.998485	1.02105	0.53218	0.928637	-1.04889	0.0580666	0.998969	1.00536	0.824756	0.977831	0.0186843	0.959142	0.386041	0.27053	0.122049	0.736959
r6fp0qdznU84lN5cSM	ILMN_2944765	AGPS	1.00655	0.869371	0.998485	-1.01154	0.724451	0.963031	1.03442	0.407411	0.998969	-1.01935	0.448939	0.880971	-0.539126	0.107802	-0.16411	0.650523	-0.0452545	0.901208
iHeE5wXgu751A6pSf4	ILMN_2760514	AGPS	1.09323	0.0407286	0.998485	1.00389	0.899429	0.985647	-1.00479	0.864653	0.998969	1.00503	0.846739	0.98412	-0.237797	0.50825	0.382293	0.275608	-0.186355	0.606214
Ba41inIqJ5Os37xwdI	ILMN_2674367	AGRN	-1.03608	0.475417	0.998485	1.05682	0.329764	0.895167	-1.05804	0.0513228	0.998969	-1.01362	0.709087	0.954815	-0.380987	0.27739	0.521961	0.121732	0.230875	0.521032
uu4dKhy4K_IMugXY6w	ILMN_2590950	AGTRAP	-1.00019	0.995285	0.999144	-1.08955	0.0875663	0.865421	-1.03178	0.319403	0.998969	-1.02947	0.2307	0.755297	-0.0445183	0.902809	0.263068	0.462737	0.046312	0.898909
WO_6gegqBExEiFfm4o	ILMN_2661820	AGXT2L1	-1.0134	0.71094	0.998485	-1.1549	0.134238	0.865421	-1.03912	0.209656	0.998969	-1.01063	0.709916	0.954815	0.646529	0.0433779	-0.340498	0.335674	-0.123484	0.733959
NlO_6gegqBExEiFfm4	ILMN_1229990	AGXT2L1	-1.02464	0.691634	0.998485	-1.19551	0.0859118	0.865421	-1.0482	0.267759	0.998969	-1.04274	0.136281	0.667939	0.638504	0.046932	0.196952	0.585495	0.0865438	0.812097
uVLSH.OXgB.ijrsTn0	ILMN_2679447	AGXT2L2	-1.00827	0.658198	0.998485	-1.01947	0.46873	0.915195	-1.01757	0.317946	0.998969	-1.00424	0.813029	0.975847	-0.00523706	0.988544	0.29462	0.408607	-0.0419672	0.908358
NXijQkVVIIx01x0DHU	ILMN_2916008	AGXT2L2	1.00445	0.843938	0.998485	NA	NA	NA	NA	NA	NA	NA	NA	NA	-0.201731	0.576237	NA	NA	NA	NA
uROi5L37Lkpv8xh_OY	ILMN_2717696	AHCTF1	1.03924	0.393136	0.998485	-1.00512	0.871573	0.982265	1.02975	0.234946	0.998969	1.05562	0.0622979	0.555698	-0.0908709	0.802853	0.676121	0.0318385	-0.254262	0.509122
udLK9H6v7LUl9RS3d0	ILMN_1245795	AHCYL1	1.10884	0.30156	0.998485	-1.029	0.607657	0.944217	-1.02951	0.382753	0.998969	1.00203	0.953415	0.99602	-0.118514	0.744361	0.145685	0.687993	-0.606714	0.0629104
6IIevt3rzulepIqAxE	ILMN_2828420	AHCYL2	1.04036	0.364542	0.998485	-1.0163	0.687577	0.957087	-1.03595	0.146502	0.998969	1.00415	0.876491	0.985484	-0.395358	0.25813	-0.213694	0.553313	0.359672	0.307342
93XUZIJYK4lf3kQBSQ	ILMN_2689187	AHDC1	-1.05918	0.56758	0.998485	1.03172	0.706376	0.960108	1.00692	0.862533	0.998969	-1.02627	0.371947	0.844586	0.255237	0.476642	0.312907	0.378689	0.373134	0.288233
T5tXpEfqSknS0d4H58	ILMN_2813712	AHI1	1.01016	0.889927	0.998485	-1.03478	0.580541	0.938523	-1.03761	0.420597	0.998969	-1.03061	0.477112	0.892591	-0.565067	0.0887334	0.105288	0.772219	0.146215	0.686905
93gr6FbglekyF4IrpI	ILMN_3079919	AHNAK	-1.18273	0.027103	0.998485	-1.02685	0.479511	0.915989	1.00081	0.984949	0.998969	1.12502	4.61471e-05	0.0432622	0.394055	0.259846	-0.259982	0.468195	0.0772867	0.831941
rYSK6Qv0TrY6QbRaos	ILMN_2675072	AHSA1	-1.04633	0.447526	0.998485	-1.07118	0.112352	0.865421	-1.02103	0.341535	0.998969	-1.03467	0.186805	0.715516	0.555989	0.0951387	-0.435283	0.208646	0.136946	0.705986
QttAXlPvIe9d5Oe4Wg	ILMN_2746000	AHSA2	-1.0102	0.666093	0.998485	-1.00332	0.850527	0.980362	-1.02014	0.368033	0.998969	-1.00239	0.88325	0.985977	-0.225349	0.531329	0.162693	0.675788	-0.280203	0.432956
fFYl7dF5T3dPUk6E.U	ILMN_2604835	AI118078	-1.00459	0.918532	0.998485	-1.02533	0.400125	0.90314	-1.01593	0.487123	0.998969	1.00746	0.689886	0.948599	-0.666896	0.0351792	-0.0208711	0.954364	0.438186	0.205279
NohIQSFInkogJdLPgg	ILMN_1249363	AI314180	-1.01375	0.683596	0.998485	-1.03317	0.630204	0.948674	1.01848	0.744824	0.998969	-1.05183	0.100843	0.618605	-0.318493	0.369771	0.326736	0.356804	0.285956	0.423161
KtBAILeiC6e94IiOpg	ILMN_2942000	AI314976	-1.05635	0.057753	0.998485	-1.01814	0.477305	0.915974	1.02869	0.417249	0.998969	-1.00613	0.774313	0.966772	0.516907	0.126036	-0.532817	0.112799	0.380477	0.278087
re351e_e6OvEku33nk	ILMN_3160963	AI316807	-1.01511	0.748062	0.998485	-1.08119	0.277778	0.891024	-1.00856	0.715997	0.998969	-1.01527	0.67096	0.942868	0.197023	0.585356	-0.396546	0.256573	0.611239	0.0604453
63juohVCuvTp6SJJxQ	ILMN_2857595	AI413582	-1.16018	0.101336	0.998485	-1.03465	0.394838	0.902716	1.05177	0.0966464	0.998969	-1.02477	0.480449	0.893505	0.496983	0.143914	-0.620426	0.0556382	-0.107099	0.76839
fp6coZXF650vO0Ot1c	ILMN_2619639	AI428936	1.00922	0.679363	0.998485	1.02784	0.254964	0.884118	-1.05283	0.0631646	0.998969	1.02648	0.185328	0.71497	-0.303223	0.394396	0.209025	0.562218	0.409023	0.240524
uIBotWDFbuVFJ4Qffw	ILMN_1213645	AI467606	1.01652	0.464645	0.998485	-1.04252	0.100758	0.865421	-1.01683	0.297324	0.998969	1.01125	0.56775	0.914342	-0.26265	0.463475	-0.159188	0.682475	0.270702	0.449358
flqVL13vdfnH4.XPTI	ILMN_2704927	AI480653	1.03492	0.354369	0.998485	-1.0244	0.353604	0.899208	1.02244	0.379527	0.998969	-1.02466	0.262789	0.775663	-0.71044	0.0213054	0.320893	0.365972	0.280014	0.43328
0PlKfy9_D5Iu7kUr0k	ILMN_2606331	AI504432	NA	NA	NA	NA	NA	NA	-1.02842	0.297613	0.998969	-1.02193	0.227454	0.752601	NA	NA	NA	NA	-0.0162145	0.96454
6VtAcPnUF9zJxJ0nXk	ILMN_1246403	AI593442	1.17549	0.0605917	0.998485	-1.01073	0.846341	0.979603	1.07163	0.117148	0.998969	-1.08163	0.0528603	0.529638	-0.219299	0.542696	-0.280204	0.432953	0.0326731	0.928604
Kyl6fee.Wgu9.7P8Z4	ILMN_2654624	AI593442	1.01368	0.904026	0.998485	1.05331	0.551743	0.931317	1.07178	0.1939	0.998969	-1.07379	0.0132072	0.370244	-0.400975	0.25081	-0.483924	0.156428	-0.452182	0.221699
KVfUIJJeRFcqpDtcTE	ILMN_2733828	AI593442	1.06879	0.308546	0.998485	-1.00343	0.927014	0.992732	1.01242	0.722902	0.998969	-1.02311	0.506007	0.900776	-0.182678	0.613463	0.00101962	0.99777	-0.398487	0.254038
6V6IigqLrl_uwtAOy4	ILMN_3160449	AI597468	1.01571	0.65636	0.998485	1.04812	0.175012	0.875372	1.06376	0.0864803	0.998969	1.00491	0.876762	0.985484	-0.231085	0.520641	0.06643	0.855324	-0.476883	0.163437
feg15JFKkeD59UCntE	ILMN_2970241	AI597479	1.00706	0.823823	0.998485	-1.03187	0.245969	0.883779	-1.03288	0.295209	0.998969	1.0171	0.500401	0.899508	-0.0346684	0.924254	0.378729	0.280484	-0.144938	0.689525
ZcF_E3uJ.9CmfP8_SQ	ILMN_2762863	AI606181	-1.07523	0.122343	0.998485	1.0483	0.25487	0.884118	1.00282	0.944739	0.998969	-1.03653	0.096743	0.608755	-0.265989	0.457597	0.0922809	0.799846	0.0321201	0.92981
W3ergCgJ0dteoipdo0	ILMN_2605858	AI646023	-1.00295	0.928996	0.998485	-1.10028	0.098587	0.865421	-1.00829	0.698239	0.998969	1.02906	0.324158	0.817675	0.307285	0.38777	-0.295605	0.406967	-0.201402	0.576873
BaxXef3rvl1MO37vO4	ILMN_2732079	AI836003	-1.04299	0.331972	0.998485	-1.21541	0.0312271	0.865421	1.04803	0.197045	0.998969	-1.00144	0.956961	0.99602	0.19112	0.596865	0.45291	0.188697	-0.227526	0.527262
csTvelCKIZKtOhOq3k	ILMN_2847950	AI837181	1.00133	0.974606	0.998485	-1.02771	0.518232	0.925802	-1.02528	0.571228	0.998969	-1.00467	0.866297	0.984632	0.632147	0.0498817	-0.592852	0.0708698	0.201503	0.576677
opPqXuiBF9XDX2eFxU	ILMN_3162431	AI846148	-1.01966	0.610408	0.998485	1.01038	0.775408	0.972372	-1.00383	0.86609	0.998969	1.00983	0.689378	0.948341	0.404489	0.24629	0.441119	0.201911	0.371711	0.290222
KV4u9Vo4Uh4.XgiJG4	ILMN_3104094	AIDA	1.04614	0.2757	0.998485	-1.02697	0.446691	0.913041	-1.00608	0.85384	0.998969	1.03786	0.0891292	0.603049	-0.45699	0.184245	0.281576	0.430609	-0.41004	0.239242
W7OKIAECBEIpQetVSU	ILMN_2804487	AIF1	-1.04141	0.51943	0.998485	-1.00545	0.871453	0.982265	1.02708	0.282967	0.998969	1.06251	0.0147277	0.382366	-0.00637839	0.986048	-0.487911	0.15254	-0.183171	0.612489
BcIQUm3iiU4lAkqP5I	ILMN_1212938	AIF1	-1.09248	0.0759702	0.998485	-1.0017	0.970589	0.996149	1.02944	0.318174	0.998969	1.00993	0.656279	0.939121	0.318958	0.369034	-0.739948	0.0144161	-0.0200368	0.956187
W.8F3cvCp8n9_oTaeU	ILMN_2741063	AIF1L	1.01649	0.698431	0.998485	-1.03303	0.395108	0.902716	1.01993	0.543157	0.998969	-1.04328	0.0671151	0.566855	-0.673722	0.0326854	0.589516	0.0728787	0.158559	0.661742
H0kxP9.OyiSg2BCXe4	ILMN_2881272	AIFM1	-1.00764	0.851701	0.998485	-1.01978	0.623887	0.94751	-1.04772	0.452965	0.998969	-1.03297	0.211887	0.73567	-0.325626	0.358537	0.273945	0.443728	0.00226827	0.995379
9V74KoocaQK7TfcXSo	ILMN_2881263	AIFM1	-1.05061	0.0530597	0.998485	1.00627	0.826379	0.977477	1.0165	0.644329	0.998969	-1.01412	0.559628	0.912546	-0.129562	0.739723	0.0550282	0.87999	-0.117741	0.745983
Wbejg3t7qgZr7UgooA	ILMN_1259418	AIFM2	1.02549	0.459249	0.998485	-1.01218	0.806744	0.975974	-1.00823	0.756942	0.998969	1.02193	0.454671	0.884143	-0.109373	0.763588	0.334522	0.378911	-0.1598	0.659228
i3qsUK0iFC16pC5QdQ	ILMN_2947901	AIFM3	1.01691	0.682271	0.998485	-1.05313	0.111034	0.865421	-1.02691	0.482678	0.998969	-1.00169	0.96673	0.997473	0.247732	0.490138	0.209056	0.589323	-0.0243348	0.946799
HiI.qTZRoTLU096c0U	ILMN_1227386	AIG1	1.01511	0.585624	0.998485	-1.01845	0.482419	0.916663	NA	NA	NA	-1.0007	0.969571	0.997506	-0.0682217	0.851458	-0.0802636	0.82555	NA	NA
Wm3o32D6_z7x5QgkV4	ILMN_2613399	AIMP1	1.00499	0.930932	0.998485	-1.01332	0.826189	0.977477	1.0067	0.836075	0.998969	1.06734	0.0365755	0.486845	0.613336	0.0593249	-0.112269	0.757483	-0.189584	0.599873
o_0Ln2qJKcoJLVlGLM	ILMN_1244330	AIMP2	-1.04294	0.318907	0.998485	-1.06945	0.0919663	0.865421	1.0436	0.120816	0.998969	1.01035	0.66774	0.94194	0.637622	0.047334	-0.448699	0.193357	0.0233405	0.948971
E9Z3OB1n_qKJW6evoA	ILMN_2943217	AIMP2	-1.06207	0.168876	0.998485	-1.00973	0.764503	0.969559	1.00301	0.945976	0.998969	1.0261	0.313029	0.808736	0.654861	0.039884	-0.3141	0.376775	0.14973	0.679711
lRe0NVR7R.mfe7MwKU	ILMN_2777655	AIP	-1.03529	0.491084	0.998485	-1.04316	0.303429	0.891024	-1.01582	0.662644	0.998969	-1.00985	0.716518	0.955938	0.336027	0.342467	-0.584888	0.0757259	-0.291581	0.413684
EiTkjwou4nlMhCjuo0	ILMN_2667805	AK1	-1.03688	0.546337	0.998485	1.03162	0.446015	0.913041	1.05877	0.0567645	0.998969	1.01069	0.758698	0.962848	0.738156	0.0147826	-0.0483604	0.894459	-0.220757	0.539948
EXtJ4IkgjXgtHU0XY4	ILMN_2848473	AK129341	1.03378	0.282994	0.998485	1.03536	0.251877	0.883779	1.01896	0.486281	0.998969	1.01042	0.720396	0.95687	-0.687548	0.028008	0.145405	0.688567	0.116549	0.748484
QcIhdJ9xMIF06NVKVI	ILMN_1235909	AK2	-1.06247	0.155482	0.998485	1.03758	0.257979	0.884665	-1.01425	0.603975	0.998969	1.01642	0.449988	0.881591	0.335109	0.343871	-0.431157	0.213483	-0.465478	0.175186
cEgpSmIWRV503VZbqM	ILMN_2660663	AK2	-1.05397	0.10789	0.998485	NA	NA	NA	-1.00649	0.693266	0.998969	-1.01934	0.341182	0.829335	0.122418	0.736187	NA	NA	-0.370228	0.292303
cY9LT4vSTUIdnnjWig	ILMN_2641360	AK2	-1.02161	0.665807	0.998485	1.02043	0.556845	0.931905	-1.00649	0.850289	0.998969	1.03403	0.174801	0.70738	0.274854	0.442157	-0.0416798	0.908984	0.371929	0.289917
Eb93Hl8.o74wUfXEF4	ILMN_1244147	AK3	1.00234	0.933011	0.998485	-1.04247	0.481053	0.915989	-1.06748	0.0622321	0.998969	1.02988	0.416357	0.865854	-0.733731	0.0244367	0.218811	0.543618	-0.256569	0.474265
93y6pCheV8TPul4KhA	ILMN_2791121	AK3	1.07125	0.205468	0.998485	-1.03982	0.348507	0.898965	-1.00878	0.763532	0.998969	1.05333	0.129311	0.659837	0.068535	0.850782	0.39683	0.2562	0.156434	0.666053
oeRD35SBA5TQeXSpHU	ILMN_1256564	AK4	1.03552	0.487476	0.998485	-1.02737	0.416449	0.906679	1.02286	0.423848	0.998969	-1.00624	0.838126	0.981272	-0.0696164	0.84845	0.0945268	0.79506	-0.386906	0.269366
uJtTVbbRccYigBEnGg	ILMN_2683792	AK5	1.08151	0.174331	0.998485	1.02398	0.781082	0.972677	-1.02887	0.498562	0.998969	1.02652	0.382558	0.849242	-0.388329	0.267455	-0.152294	0.674478	-0.0453358	0.901032
rXvcSgd6o3okscY2JQ	ILMN_2590894	AK8	-1.00321	0.914305	0.998485	-1.01747	0.44765	0.913041	-1.00053	0.981	0.998969	-1.00964	0.554478	0.910418	0.370776	0.291533	-0.104698	0.773466	-0.130719	0.718888
cVLi6qgqSe835Ql6_w	ILMN_3146196	AKAP1	1.06345	0.220514	0.998485	1.09984	0.129292	0.865421	-1.02799	0.304132	0.998969	-1.02095	0.44333	0.877526	0.0501375	0.890599	0.486324	0.15408	-0.0751225	0.836594
HS5h6X13j0nOi7r6I4	ILMN_1219231	AKAP1	1.03999	0.252117	0.998485	1.05382	0.195936	0.875854	-1.01697	0.551436	0.998969	-1.01927	0.456721	0.884316	-0.505126	0.165427	0.0766226	0.833369	-0.156515	0.665888
rumJULLp9c4ohQ4rog	ILMN_2775655	AKAP1	1.03553	0.312244	0.998485	1.02932	0.249628	0.883779	-1.01079	0.590826	0.998969	1.01178	0.54847	0.908838	-0.52178	0.121884	0.0890164	0.806812	0.199333	0.580876
Eef0qT96d174LM_FfU	ILMN_2645981	AKAP10	-1.03896	0.0939938	0.998485	-1.02017	0.326165	0.895167	1.03162	0.0817052	0.998969	-1.02773	0.104021	0.622341	0.235871	0.541211	0.0262264	0.942669	-0.182717	0.613386
Hoh0dnlfefL6f5H7pE	ILMN_1220276	AKAP10	1.00822	0.713007	0.998485	1.02883	0.315301	0.893519	-1.03174	0.189784	0.998969	-1.00371	0.852234	0.984525	0.33779	0.339781	-0.184167	0.610522	-0.222754	0.536192
N7qdstd4C6_.1zkS4k	ILMN_2624622	AKAP12	1.01606	0.678933	0.998485	-1.22342	0.0928757	0.865421	-1.01023	0.645912	0.998969	1.02888	0.251039	0.77025	0.0293007	0.93596	0.160252	0.658314	0.0372254	0.924252
HKt7a6SKerpHqHE65M	ILMN_3116504	AKAP2	1.05292	0.075058	0.998485	1.00636	0.833503	0.977763	-1.00267	0.901187	0.998969	-1.02306	0.337035	0.827523	0.095742	0.792474	0.0748007	0.837286	-0.387664	0.268347
obqXVjOju5PnXfK420	ILMN_3005211	AKAP6	1.07367	0.0289422	0.998485	-1.04095	0.365901	0.899257	1.02765	0.536391	0.998969	-1.05002	0.0285099	0.450407	-0.11124	0.759651	0.095409	0.793182	0.110213	0.761816
Tnj9BeP_Uyd1HvvOXo	ILMN_2944413	AKAP7	1.02278	0.716659	0.998485	-1.07658	0.132732	0.865421	1.02004	0.643451	0.998969	1.00733	0.877651	0.985484	0.227567	0.527185	-0.23613	0.511315	0.424485	0.221441
i0kd7gok8cqrKI5H_o	ILMN_2920008	AKAP8	-1.04419	0.443469	0.998485	1.04954	0.153772	0.868191	-1.02321	0.613052	0.998969	1.03035	0.318226	0.814172	-0.000255494	0.999441	0.361893	0.304144	0.248055	0.489554
3tTBXxWkqdW6WKegtQ	ILMN_1242769	AKAP8L	1.00768	0.938013	0.998485	1.10311	0.138852	0.865421	-1.10151	0.076481	0.998969	1.00755	0.813859	0.975847	-0.547364	0.101491	-0.190105	0.598852	0.255935	0.475396
HnnoYsX5rleZ.3xAnE	ILMN_2627300	AKAP9	1.02263	0.702609	0.998485	1.19527	0.0187001	0.865421	1.01426	0.765029	0.998969	-1.01981	0.556064	0.910454	-0.517355	0.125651	0.317415	0.405227	-0.42099	0.225677
uueehixfmuV5n.fECc	ILMN_2627299	AKAP9	-1.05945	0.188406	0.998485	1.17628	0.046063	0.865421	1.01127	0.789791	0.998969	1.03886	0.411559	0.86459	-0.414639	0.23349	-0.0432215	0.905629	-0.41866	0.228525
ujUCXgHIHqQd0kgYmg	ILMN_2678495	AKAP9	-1.05105	0.569464	0.998485	1.03073	0.450231	0.913041	1.0058	0.844562	0.998969	1.0067	0.720134	0.95687	0.369585	0.293208	0.338922	0.338061	-0.449344	0.192638
0mU144lLXn4IFLLfpE	ILMN_3147135	AKR1A4	1.03667	0.290101	0.998485	-1.00635	0.841604	0.97923	1.02587	0.50996	0.998969	1.00289	0.936792	0.993628	-0.124611	0.731607	-0.179562	0.61963	-0.127752	0.72506
TSvSaAuN5NVAJNDX1Y	ILMN_3068754	AKR1A4	1.02262	0.574178	0.998485	-1.00059	0.983872	0.997614	1.00913	0.713126	0.998969	-1.0463	0.238638	0.761578	0.704036	0.0230546	-0.247172	0.491152	-0.12158	0.737941
u1f4Fv3kkFOll9uGdc	ILMN_2616422	AKR1B10	-1.02411	0.345562	0.998485	-1.05866	0.276522	0.891024	1.0274	0.201695	0.998969	1.01514	0.537325	0.905487	0.630834	0.0505058	-0.476992	0.163328	0.705234	0.0227201
HZ_XooR30eM5BWdceE	ILMN_2733753	AKR1B10	-1.07799	0.14032	0.998485	-1.19586	0.0782461	0.865421	1.02978	0.466657	0.998969	-1.00268	0.935531	0.993628	0.345402	0.328305	-0.300845	0.398299	0.303929	0.39324
KVV6KH8EQsV.UFAiCQ	ILMN_2591917	AKR1B3	-1.02169	0.72697	0.998485	-1.0157	0.703777	0.959225	1.05237	0.481676	0.998969	-1.002	0.936438	0.993628	-0.372674	0.288876	-0.181574	0.615645	0.0881435	0.808677
x_0vLbJf3p9z.SC4Dk	ILMN_2602837	AKR1E1	-1.00014	0.996807	0.999339	-1.03585	0.350407	0.898965	1.00195	0.966566	0.998969	1.04374	0.234981	0.758739	0.28418	0.426174	0.567484	0.0870759	0.285351	0.424186
r6KWJ11Xl0hH2h4r3E	ILMN_2625991	AKR7A5	1.0207	0.63364	0.998485	-1.04496	0.22918	0.883779	1.03008	0.412684	0.998969	-1.04947	0.0125124	0.361998	0.406131	0.244193	-0.532142	0.113342	0.195055	0.589184
KlHigqVeiWntugl.hQ	ILMN_2908045	AKR7A5	-1.05335	0.252641	0.998485	-1.00337	0.892493	0.984654	1.02459	0.42281	0.998969	-1.01628	0.418451	0.868134	0.457188	0.184031	-0.443637	0.199045	-0.10121	0.780858
66UdflS54XLu5.2nrc	ILMN_1256518	AKR7A5	-1.01794	0.818108	0.998485	-1.08822	0.104601	0.865421	1.00563	0.874623	0.998969	-1.0091	0.696954	0.951493	-0.15677	0.66537	-0.426049	0.219561	-0.136305	0.707311
0EsUn17VWFcErl8ApU	ILMN_1214358	AKT1S1	-1.01162	0.805244	0.998485	1.01569	0.620636	0.947092	1.00309	0.921076	0.998969	1.00297	0.915346	0.991497	0.586021	0.0750225	0.0726939	0.84182	0.347365	0.325378
0W3se3E0a9XyfnXrLk	ILMN_2904321	AKT3	1.01417	0.723779	0.998485	-1.03217	0.479229	0.915989	1.00285	0.925521	0.998969	-1.05105	0.101572	0.619362	-0.476548	0.163776	0.210753	0.558914	-0.429904	0.214965
o3yH_XiHj16E3cUtdk	ILMN_1259290	AKT3	NA	NA	NA	NA	NA	NA	NA	NA	NA	-1.00436	0.849773	0.984525	NA	NA	NA	NA	NA	NA
xfsrXSernshiTgvFyw	ILMN_2596713	AKTIP	1.01267	0.805606	0.998485	-1.01796	0.73263	0.964881	-1.01252	0.710273	0.998969	-1.00515	0.861212	0.984632	-0.431397	0.2132	0.0351757	0.928415	-0.291581	0.446487
xhQnV6l8SCqgLA5nvI	ILMN_2655015	ALAD	-1.00128	0.98263	0.998485	1.01635	0.69827	0.957796	1.01863	0.579583	0.998969	1.01062	0.716374	0.955938	0.296338	0.40575	-0.584459	0.0759935	0.596885	0.0684901
udLz0QFUpTxTFRMslI	ILMN_2664040	ALAS1	1.04145	0.475527	0.998485	-1.00288	0.896038	0.985277	1.00205	0.936033	0.998969	-1.00484	0.882963	0.985977	-0.304007	0.393112	0.0173932	0.961964	0.0362926	0.920715
ZbXuR.gfOJi6iY1x.o	ILMN_2675874	ALAS2	1.02222	0.579008	0.998485	-1.02968	0.352365	0.898965	NA	NA	NA	1.13705	0.00804678	0.323784	-0.0815518	0.822787	-0.367389	0.330715	NA	NA
oEx.heCdArpL7iPqEQ	ILMN_2606804	ALCAM	1.08568	0.392968	0.998485	1.11169	0.356306	0.899208	-1.02702	0.64333	0.998969	1.04909	0.270492	0.777817	-0.879315	0.000800318	0.23871	0.506573	-0.46496	0.175731
95KAXQt7urASqfVCpc	ILMN_1245112	ALDH16A1	1.00898	0.725684	0.998485	NA	NA	NA	NA	NA	NA	NA	NA	NA	0.344227	0.330063	NA	NA	NA	NA
lt1peqETrF9AsvoN4k	ILMN_3123473	ALDH18A1	-1.0298	0.463485	0.998485	1.04791	0.0496042	0.865421	-1.03051	0.208058	0.998969	-1.00678	0.812205	0.975847	0.227748	0.526848	0.0290085	0.936597	0.242043	0.500475
cgyCjIzCZCd3sHW04U	ILMN_1222734	ALDH1A1	-1.01941	0.67068	0.998485	-1.26023	0.192421	0.875854	-1.01898	0.675994	0.998969	1.00148	0.973231	0.997506	-0.537085	0.109403	0.584879	0.0757314	0.171325	0.636035
Ez0AUeHpTACi46njVo	ILMN_1257020	ALDH1B1	1.00142	0.948265	0.998485	1.0458	0.0279358	0.865421	-1.02033	0.301766	0.998969	1.00086	0.965342	0.997417	-0.183218	0.612396	0.317606	0.37118	-0.447173	0.195061
ros_UG67goKpRHre64	ILMN_3100276	ALDH1L1	1.05184	0.114667	0.998485	-1.02609	0.520608	0.926016	1.02492	0.498964	0.998969	1.00043	0.988593	0.998221	0.138969	0.701808	-0.217207	0.546649	-0.0778348	0.830764
WXonq6AtFXzTf54e4U	ILMN_2706906	ALDH1L1	1.09897	0.0218234	0.998485	-1.02192	0.477671	0.915974	1.01134	0.716827	0.998969	1.01035	0.705494	0.953873	-0.0473905	0.896566	-0.420622	0.259608	-0.195237	0.588829
EDaQVXoSIxQU6VkgU4	ILMN_2703392	ALDH1L1	1.08787	0.0191575	0.998485	-1.08271	0.0432639	0.865421	-1.00437	0.918381	0.998969	1.00453	0.847307	0.984334	-0.45488	0.18654	-0.588602	0.0734351	-0.0723535	0.842553
Qsb.T3VIVOROSRweBI	ILMN_2898319	ALDH1L2	1.00697	0.769938	0.998485	-1.05762	0.0106532	0.844109	-1.00671	0.747908	0.998969	1.01087	0.618115	0.930567	-0.133279	0.713576	0.569071	0.0859982	-0.332409	0.348015
NbUjuSjnl9BeS1cJJA	ILMN_2733179	ALDH2	-1.02777	0.337542	0.998485	-1.08776	0.0916186	0.865421	1.00541	0.872993	0.998969	-1.00706	0.854036	0.984525	-0.210094	0.560174	-0.473885	0.166479	0.18428	0.6103
WF4R_.56e17X4IPnRo	ILMN_1253178	ALDH3A1	-1.04104	0.210562	0.998485	NA	NA	NA	1.0032	0.895799	0.998969	-1.02935	0.152073	0.682017	0.214812	0.551188	NA	NA	0.062022	0.864848
Wlu.54sF7VFvinN4Ls	ILMN_2925350	ALDH3A2	1.03226	0.575681	0.998485	-1.03415	0.349023	0.898965	1.00021	0.994429	0.999304	-1.0437	0.170697	0.702827	-0.627058	0.0523296	-0.430848	0.213848	-0.281955	0.429962
iKeKsoKSgqOS4UyDfY	ILMN_2953513	ALDH3B1	-1.04223	0.193715	0.998485	-1.00827	0.714119	0.961735	1.01648	0.433403	0.998969	-1.00773	0.642254	0.936381	-0.0357916	0.921806	0.303549	0.393861	-0.376077	0.284143
NR94HFRXdujLvkKiS4	ILMN_2645793	ALDH3B1	-1.0585	0.240938	0.998485	-1.04294	0.207269	0.879457	1.00736	0.794605	0.998969	1.00362	0.883893	0.986239	-0.135103	0.709798	0.064154	0.860239	0.398757	0.253686
9Us7nuunjfO7Rf5elE	ILMN_2874554	ALDH4A1	1.02774	0.640369	0.998485	1.00644	0.878686	0.982265	-1.01108	0.748079	0.998969	1.03966	0.24354	0.764484	-0.816541	0.00394615	0.0154231	0.96627	-0.332489	0.347892
csXIrQs7u8aKfsq95E	ILMN_2664660	ALDH5A1	1.01658	0.485425	0.998485	-1.02265	0.602056	0.942301	1.0102	0.713013	0.998969	1.00965	0.610725	0.929414	0.0871346	0.810834	-0.352245	0.318162	-0.536606	0.109781
lUk.1f.tfM7f54P_4k	ILMN_1258158	ALDH6A1	-1.00743	0.924983	0.998485	-1.02084	0.753454	0.96795	-1.02943	0.540199	0.998969	-1.03503	0.507403	0.900776	-0.699702	0.0242928	0.322658	0.36319	0.123551	0.73382
u6ggogXgpJUoosTQmY	ILMN_2599130	ALDOA	1.00929	0.776229	0.998485	1.04603	0.382743	0.899257	1.02204	0.51741	0.998969	-1.03081	0.3774	0.847273	0.692942	0.0385056	0.0947746	0.794533	-0.260294	0.467641
Tl8T57FYhRKOoqyI5U	ILMN_3160137	ALDOC	1.05258	0.301564	0.998485	-1.09109	0.294214	0.891024	-1.00442	0.906179	0.998969	-1.0114	0.685175	0.948109	0.301981	0.396432	0.0434568	0.905118	0.106612	0.769419
xK66E7_rlH5e7uW4H0	ILMN_3000759	ALG1	1.07527	0.0263952	0.998485	-1.00857	0.812095	0.976557	1.04339	0.332194	0.998969	-1.02508	0.329952	0.822058	0.167713	0.643274	-0.0308944	0.932483	-0.104258	0.774399
ilnx9yoOvyrGO.Uu6E	ILMN_2817021	ALG10B	-1.00688	0.797268	0.998485	1.01386	0.571783	0.935687	1.02461	0.366409	0.998969	-1.03468	0.0758562	0.586444	-0.154408	0.67017	-0.286335	0.422519	-0.259029	0.469887
fRQ06Se8yVik7zdT9I	ILMN_2869182	ALG12	-1.01478	0.680274	0.998485	-1.0605	0.0745656	0.865421	-1.02491	0.242071	0.998969	-1.02334	0.33807	0.828649	0.172123	0.634439	0.00250447	0.994521	0.0429714	0.906173
lgBJAhSofUk7cSTl64	ILMN_2680686	ALG12	-1.01093	0.630701	0.998485	-1.04883	0.0450232	0.865421	1.01938	0.317201	0.998969	-1.00712	0.749721	0.961586	-0.0886117	0.807677	-0.842863	0.00219662	0.397101	0.255847
6qCNeKRd1hx9PvS6VE	ILMN_2605575	ALG14	-1.03193	0.355927	0.998485	-1.03383	0.466815	0.914237	1.00177	0.950752	0.998969	1.04802	0.117256	0.639068	0.393323	0.260811	-0.579187	0.0793313	0.242382	0.499856
ElJIKTpkhyKxv9Vfgg	ILMN_2803334	ALG2	1.07664	0.172204	0.998485	-1.07959	0.0607998	0.865421	1.00872	0.791714	0.998969	-1.0637	0.0205364	0.425523	0.371208	0.290928	-0.0074953	0.983605	0.202759	0.574253
cp7VWLX1cIk9JQkoAc	ILMN_2910106	ALG3	1.00055	0.98439	0.998485	1.02736	0.215256	0.883043	-1.01245	0.541003	0.998969	1.00553	0.793058	0.970205	0.655201	0.0554269	-0.479537	0.160773	0.180364	0.61804
H_J3XoMbFTUbX0neWU	ILMN_1215893	ALG3	1.03396	0.408901	0.998485	-1.00138	0.96219	0.994812	1.00548	0.85897	0.998969	-1.02924	0.224472	0.749657	0.591793	0.0715034	-0.297117	0.404457	-0.155876	0.667187
fPid16DGxU1G19J3lk	ILMN_2744459	ALG3	-1.01984	0.55468	0.998485	1.00683	0.874467	0.982265	1.00443	0.880972	0.998969	1.01748	0.445657	0.879091	0.54608	0.102459	0.091281	0.801978	0.200296	0.579011
BvnpKnoeT.zVE5D9H4	ILMN_1222503	ALG5	-1.06886	0.1549	0.998485	-1.03518	0.344167	0.898965	-1.02819	0.415041	0.998969	-1.01306	0.580571	0.917535	0.010271	0.977535	0.0712282	0.844976	0.415465	0.232466
TERLmr0Dx4ViCSSVoU	ILMN_2660414	ALG5	1.00788	0.786826	0.998485	-1.02627	0.472714	0.915974	1.01116	0.691414	0.998969	-1.00094	0.971587	0.997506	0.715104	0.0200906	-0.392309	0.262153	0.654472	0.0400428
BjXTpI54aJRAv1I74g	ILMN_1215967	ALG5	-1.03601	0.162523	0.998485	-1.05794	0.111753	0.865421	1.00201	0.932869	0.998969	1.03186	0.110437	0.630996	0.26519	0.459001	-0.0805259	0.824987	0.230102	0.522467
N6rvfos36h6hecq0ek	ILMN_3040759	ALG6	NA	NA	NA	-1.01781	0.339705	0.898965	NA	NA	NA	1.00609	0.699562	0.952578	NA	NA	0.723782	0.0179593	NA	NA
65XlyQXj79TriiUflc	ILMN_1237963	ALG8	1.01561	0.634837	0.998485	1.00826	0.729252	0.964704	1.01374	0.61868	0.998969	-1.00853	0.709263	0.954815	-0.361408	0.304841	0.0235634	0.948484	0.0123419	0.973006
HVSpdDhC6.r0kvUkRI	ILMN_2765304	ALG8	-1.00295	0.893665	0.998485	1.02498	0.196486	0.875854	-1.00685	0.704294	0.998969	-1.00711	0.68296	0.947727	0.024224	0.947041	-0.598036	0.0678205	-0.52167	0.121977
ZAee7UeKuBaqurgC6Q	ILMN_2833587	ALG8	1.00985	0.630116	0.998485	1.0092	0.653609	0.953578	NA	NA	NA	-1.00252	0.88253	0.985977	-0.57976	0.0789639	-0.530118	0.114981	NA	NA
ZsRYD6fkNHRJdUM3S4	ILMN_1218327	ALG8	-1.00234	0.914724	0.998485	NA	NA	NA	NA	NA	NA	1.00222	0.896298	0.987968	0.465033	0.175654	NA	NA	NA	NA
KcqfUaJYfXUKTXvIns	ILMN_2609495	ALG9	-1.02074	0.503829	0.998485	-1.06612	0.0113734	0.865421	1.0328	0.126122	0.998969	-1.01152	0.659073	0.939451	-0.0384846	0.91594	-0.547865	0.126752	0.0888003	0.807274
lR6KiCLIG5_SAeYihc	ILMN_2892292	ALG9	1.00586	0.808513	0.998485	-1.00927	0.673672	0.956739	-1.02361	0.243726	0.998969	-1.03624	0.150038	0.680331	-0.165958	0.646802	0.148337	0.682559	0.347063	0.325827
BpJ9L09TSL0itJxQJc	ILMN_2687908	ALG9	1.00665	0.778697	0.998485	-1.01024	0.681578	0.957087	-1.01701	0.344285	0.998969	1.01087	0.521935	0.902475	-0.261161	0.466106	-0.58198	0.0775515	-0.172384	0.657404
0VcKff1j.7uZ3n1my0	ILMN_2769925	ALK	-1.00139	0.966887	0.998485	1.02196	0.488127	0.918304	-1.02011	0.343655	0.998969	-1.00918	0.658552	0.939451	0.33713	0.340785	-0.0808293	0.824337	-0.529138	0.115779
NP9aRAh3YqCKVaKEug	ILMN_2620365	ALKBH2	-1.03321	0.168733	0.998485	1.00648	0.694881	0.957376	NA	NA	NA	-1.00497	0.789185	0.969438	0.320803	0.366113	0.624226	0.07236	NA	NA
EieUkbRftBO3HEoEfE	ILMN_2699294	ALKBH3	-1.03695	0.446048	0.998485	1.0363	0.322264	0.895167	-1.01658	0.545397	0.998969	-1.00851	0.76338	0.964155	-0.353337	0.316559	0.157256	0.664384	0.223065	0.563999
B4S7Hriv8oolN4V_G0	ILMN_1226152	ALKBH4	1.03526	0.254039	0.998485	-1.00196	0.937779	0.994016	-1.01559	0.51651	0.998969	1.00053	0.979895	0.998221	0.592558	0.0710452	-0.316408	0.373087	-0.0998037	0.783841
6lz8jXoK6r08o_H_kk	ILMN_1255259	ALKBH5	-1.01941	0.513067	0.998485	1.02327	0.408243	0.905432	-1.00547	0.754251	0.998969	-1.03882	0.0830129	0.5933	0.0103126	0.977444	-0.793014	0.00620274	-0.0853129	0.81473
opSCJRdSXnhdUTNdTM	ILMN_1251766	ALKBH7	-1.04499	0.519361	0.998485	-1.03975	0.51244	0.921444	-1.01523	0.580867	0.998969	1.01981	0.335374	0.826797	0.214771	0.551266	-0.48121	0.159108	0.234759	0.513843
ibK9d8Tl.ws67_E8H4	ILMN_1258943	ALKBH8	-1.05623	0.113893	0.998485	-1.00592	0.854857	0.980434	-1.00722	0.829216	0.998969	-1.01156	0.666713	0.941647	-0.612398	0.079586	0.28775	0.420127	-0.118298	0.744814
EipRUf3FEPHyf3RzFE	ILMN_2613908	ALOX12	-1.0395	0.157385	0.998485	NA	NA	NA	NA	NA	NA	NA	NA	NA	0.102181	0.778799	NA	NA	NA	NA
NTU4oFRY5IUKpwcd5I	ILMN_1235966	ALOX12B	-1.03492	0.222119	0.998485	1.00207	0.939418	0.994083	1.01143	0.636944	0.998969	1.00887	0.615272	0.929464	0.424986	0.254175	-0.0459514	0.899693	-0.213011	0.554611
xVdg5prpUo.PtxNSXM	ILMN_2863837	ALOX5AP	1.00458	0.909573	0.998485	-1.04145	0.300875	0.891024	1.02805	0.25319	0.998969	-1.01617	0.473925	0.891238	0.187457	0.604046	-0.352009	0.31851	0.504672	0.136842
l3S.oX3XeVOoUY6X4Q	ILMN_1248005	ALOXE3	-1.02185	0.515272	0.998485	1.03564	0.169337	0.869529	-1.04056	0.0325257	0.998969	1.00012	0.994528	0.998817	-0.0363546	0.920579	-0.293803	0.409969	0.0692016	0.859585
3eqoIUredKOIdUoJRc	ILMN_2661287	ALPL	-1.00083	0.968354	0.998485	-1.03929	0.0721902	0.865421	-1.01847	0.413281	0.998969	-1.00103	0.9615	0.996612	-0.315118	0.375147	-0.414074	0.234192	-0.0590211	0.87134
EpEpFh6KeOqQIEu_DE	ILMN_2620053	ALS2	1.00033	0.99115	0.998928	-1.00642	0.797789	0.974337	-1.01184	0.63136	0.998969	-1.00124	0.952717	0.99602	0.109862	0.762556	-0.206893	0.566301	0.0710451	0.845371
W6MUSud9bdN57HaKYk	ILMN_2817883	ALS2	1.03646	0.360282	0.998485	-1.01421	0.622205	0.94739	1.00586	0.776559	0.998969	-1.03942	0.0858302	0.595669	-0.308878	0.385186	0.288646	0.418616	0.448043	0.194088
omS6Xh06gOHSSmkHH8	ILMN_2717470	ALS2	1.0117	0.778049	0.998485	-1.01066	0.678111	0.957087	1.00338	0.903036	0.998969	-1.02313	0.336726	0.827182	-0.565624	0.0883497	0.12248	0.736059	-0.181581	0.61563
T3nmtXohuOqCCSuvJg	ILMN_3058640	ALS2CR4	-1.00195	0.947521	0.998485	1.0353	0.0953318	0.865421	1.02953	0.138061	0.998969	1.0033	0.867097	0.984632	0.144987	0.689425	0.194666	0.589941	-0.0246141	0.946189
KWPduU6NMuDeuundes	ILMN_3135801	ALS2CR4	-1.04584	0.324686	0.998485	-1.0094	0.759694	0.969424	1.03131	0.386738	0.998969	-1.02211	0.381629	0.849242	0.703075	0.0233253	-0.107113	0.76836	-0.206546	0.566967
rKKO9a6ov4MYt61Zbk	ILMN_3060966	ALS2CR4	1.00497	0.80837	0.998485	NA	NA	NA	NA	NA	NA	NA	NA	NA	0.599409	0.0670275	NA	NA	NA	NA
xSp6KiiPUrSDuK363s	ILMN_3124160	AMBRA1	1.00675	0.81563	0.998485	-1.01056	0.82727	0.977477	1.00859	0.772302	0.998969	-1.07172	0.022075	0.432703	-0.126681	0.745354	0.50792	0.13392	-0.0160784	0.964838
9nRQOaEXui4KAyXn5c	ILMN_2760593	AMBRA1	-1.01673	0.705221	0.998485	-1.02172	0.634503	0.949555	1.0033	0.862351	0.998969	-1.04224	0.260747	0.774312	-0.411565	0.237326	0.522006	0.121694	0.603218	0.085491
BQqxURaD9SggNi.fDs	ILMN_2992239	AMD2	1.03637	0.444722	0.998485	-1.01882	0.602588	0.942659	-1.01404	0.753615	0.998969	-1.01587	0.627199	0.933536	-0.569053	0.0860104	-0.231319	0.520206	-0.233818	0.515581
3CEerpJMlVOju5taT8	ILMN_2831944	AMDHD2	-1.04484	0.197534	0.998485	1.0233	0.430354	0.912674	1.00493	0.858633	0.998969	1.02443	0.395034	0.855186	0.448705	0.193349	0.440647	0.202451	0.217277	0.546516
laqWDXoVIAnv.4oim4	ILMN_2605556	AMDHD2	-1.00676	0.774386	0.998485	NA	NA	NA	NA	NA	NA	NA	NA	NA	-0.310192	0.383061	NA	NA	NA	NA
fjvgw1E5dCSHa1SNp0	ILMN_2722902	AMFR	1.10602	0.0949699	0.998485	1.02944	0.454474	0.913041	-1.01217	0.659303	0.998969	-1.0062	0.823768	0.977831	-0.37811	0.281337	0.488311	0.152153	0.573676	0.106289
xi1Y17KYR70rs7A4sk	ILMN_2684178	AMHR2	1.01941	0.36451	0.998485	NA	NA	NA	NA	NA	NA	NA	NA	NA	-0.205098	0.569749	NA	NA	NA	NA
ZVOp3MHIQ4U8Ben4t0	ILMN_1214975	AMIGO1	-1.05228	0.474511	0.998485	1.03052	0.447048	0.913041	1.02003	0.724308	0.998969	-1.01412	0.610658	0.929414	-0.454618	0.186826	0.215846	0.549226	0.432348	0.212081
TlXgIpSgKshe3iiBAk	ILMN_3135640	AMIGO1	-1.02079	0.560746	0.998485	-1.05006	0.216158	0.883043	-1.00321	0.928056	0.998969	-1.03494	0.225323	0.750728	-0.0195003	0.957359	0.583678	0.0989378	0.201086	0.577483
xfME1Eq95RNU7LkCoQ	ILMN_2678355	AMIGO2	-1.00368	0.963625	0.998485	-1.14071	0.221507	0.88352	-1.11138	0.122974	0.998969	1.02165	0.674184	0.945353	0.245945	0.493375	0.698775	0.0362349	-0.0430607	0.912413
9qC544T6DlSjk6V8eU	ILMN_1229706	AMMECR1L	1.01395	0.760949	0.998485	1.00447	0.886141	0.983328	1.02131	0.473004	0.998969	-1.04493	0.0256749	0.449398	-0.523197	0.120693	0.28925	0.417599	-0.310866	0.381973
3cp9wXuh70VXaIW4fc	ILMN_2675289	AMN	-1.05119	0.577171	0.998485	1.0144	0.790844	0.973843	1.013	0.713404	0.998969	-1.0331	0.286768	0.794589	0.0424825	0.907237	-0.390056	0.265147	0.300592	0.398716
K4L1J63mepIkofKdHQ	ILMN_2701534	AMPD2	-1.03547	0.574715	0.998485	-1.03801	0.257688	0.884665	-1.07192	0.138975	0.998969	-1.01593	0.713694	0.955244	0.316674	0.372664	0.386613	0.304021	0.110006	0.778145
ZZPnfP7aTxJ5L.l_qQ	ILMN_2842843	AMPH	1.01842	0.760044	0.998485	1.06583	0.199529	0.875854	-1.02117	0.519454	0.998969	1.00027	0.99412	0.998817	-0.160381	0.658052	0.50947	0.132539	-0.303609	0.393764
cKxJohu6p4zuCqdS4g	ILMN_3160992	AMT	-1.00184	0.942347	0.998485	1.00022	0.993301	0.999326	NA	NA	NA	NA	NA	NA	-0.463627	0.177139	-0.521723	0.121933	NA	NA
QFAguJPBUhJH7pDh6M	ILMN_2626453	AMY1	-1.00251	0.955921	0.998485	-1.03127	0.296671	0.891024	-1.02838	0.303109	0.998969	-1.01441	0.489049	0.895877	-0.288285	0.419224	0.617418	0.0571831	0.275344	0.441309
ieKE.uV7gnpIbqrjqk	ILMN_2756474	AMZ1	1.00941	0.667246	0.998485	1.03209	0.247712	0.883779	1.02927	0.131777	0.998969	1.01816	0.477719	0.892611	-0.366485	0.29759	-0.0932688	0.79774	0.638632	0.0468738
xWm13g7_VzefGAnki4	ILMN_2464898	AMZ2	-1.00409	0.884343	0.998485	1.00927	0.770104	0.970713	1.02105	0.536825	0.998969	-1.0065	0.809696	0.975109	-0.124811	0.731189	-0.54754	0.101359	-0.269915	0.450729
i1F2tU_i9eX6f3Emh4	ILMN_3099265	ANAPC11	1.01888	0.462096	0.998485	1.0155	0.417543	0.907144	NA	NA	NA	NA	NA	NA	-0.237933	0.507999	-0.545741	0.102715	NA	NA
fxKl1GIG1RWegHjlqc	ILMN_2796089	ANAPC13	-1.19223	0.155625	0.998485	-1.01891	0.820251	0.97743	-1.05126	0.0794997	0.998969	1.06812	0.0766448	0.586444	0.257104	0.473311	-0.324511	0.360281	0.44107	0.234678
xVYLfLWnxKs4CS97pA	ILMN_1219088	ANAPC16	1.02475	0.471587	0.998485	1.03035	0.447662	0.913041	1.00249	0.918081	0.998969	-1.00168	0.954249	0.99602	-0.392718	0.261612	-0.0273017	0.940322	-0.760767	0.0106126
WeoXv0kIuDKvpJ0i3U	ILMN_2901312	ANAPC2	-1.00662	0.894753	0.998485	-1.03405	0.408026	0.905432	-1.01232	0.655238	0.998969	-1.0049	0.882708	0.985977	-0.569134	0.0859559	-0.336163	0.342261	0.187324	0.604308
BoLvtItIhIp0UIZ55U	ILMN_2859778	ANAPC4	-1.06257	0.135442	0.998485	-1.02219	0.497126	0.919326	1.00341	0.916491	0.998969	-1.02798	0.375374	0.846547	-0.364912	0.299827	-0.562761	0.0903339	-0.0324995	0.928982
oUodXn467k.Krq08Tk	ILMN_2738536	ANAPC5	1.04498	0.490208	0.998485	1.01755	0.649217	0.951616	-1.04032	0.172965	0.998969	-1.01081	0.781242	0.968649	-0.510243	0.131854	-0.291159	0.414391	-0.599992	0.0666927
Znt7B171Kh3hFdKSEw	ILMN_3158200	ANAPC5	-1.04817	0.306628	0.998485	1.01236	0.652071	0.95332	1.00272	0.921114	0.998969	-1.04139	0.0649489	0.561077	-0.141064	0.69749	-0.622409	0.0546349	-0.102537	0.778043
ropDyj5UotQY0bu3kk	ILMN_2648397	ANAPC5	1.22965	0.0185502	0.998485	1.03508	0.387505	0.899627	-1.00304	0.921893	0.998969	1.02604	0.35338	0.835255	-0.397169	0.255757	-0.401626	0.249969	-0.709072	0.0216711
fHkiSR_lUupI3iiSOM	ILMN_2870688	ANAPC7	-1.01553	0.864298	0.998485	-1.04321	0.389632	0.900854	-1.00827	0.829319	0.998969	-1.02629	0.392125	0.853931	-0.218205	0.544762	-0.35398	0.315617	0.052895	0.884615
6U5SxYl3kq9ITvvPl4	ILMN_2875251	ANG	-1.07458	0.00891773	0.936004	1.00815	0.686353	0.957087	-1.00693	0.763827	0.998969	1.01671	0.349773	0.833567	0.444091	0.198532	-0.566638	0.0876539	-0.241366	0.501711
BXlKA5K9B5wKKSKtIk	ILMN_2598438	ANGEL1	NA	NA	NA	-1.01092	0.595231	0.939387	NA	NA	NA	NA	NA	NA	NA	NA	0.322857	0.362878	NA	NA
uTnl.3ohUv0_ogl7m4	ILMN_3160697	ANGEL2	1.04415	0.308386	0.998485	1.09493	0.134266	0.865421	-1.00665	0.796232	0.998969	-1.03988	0.100466	0.616947	-0.201773	0.576157	0.291575	0.413694	-0.365157	0.299477
rmU764OaIexz.v99ek	ILMN_1234487	ANGPT2	1.00438	0.8276	0.998485	NA	NA	NA	-1.0177	0.343592	0.998969	1.0506	0.0196937	0.419694	-0.353564	0.316227	NA	NA	-0.0459333	0.899733
cUgBOp2KpHgzR92XFI	ILMN_2759365	ANGPTL4	-1.01586	0.518516	0.998485	-1.03516	0.163649	0.869529	1.02744	0.217139	0.998969	1.04108	0.0728507	0.580937	0.299594	0.400361	-0.519466	0.123845	0.523979	0.120039
0T9T9yMVLtXTO5UU6g	ILMN_1232621	ANK	1.10116	0.150754	0.998485	-1.03022	0.347091	0.898965	-1.0023	0.943994	0.998969	-1.05951	0.032796	0.477089	-0.419007	0.2281	0.0433841	0.905276	-0.0533852	0.883552
BZ1b5yyie.yii.qt1E	ILMN_2715601	ANK1	1.0249	0.62351	0.998485	-1.09796	0.51638	0.924468	-1.06857	0.103903	0.998969	-1.10794	0.00462016	0.269892	0.32026	0.366972	0.324819	0.359799	0.0758393	0.835052
ZZnVvnLKJ7.KKL_q3U	ILMN_1244879	ANK1	-1.01864	0.663151	0.998485	-1.26747	0.0873668	0.865421	-1.02559	0.552613	0.998969	-1.01416	0.713154	0.955244	0.689391	0.0274212	0.105052	0.772719	0.178333	0.622067
WZTt530n5I4j.qA1_g	ILMN_2718030	ANK2	1.13901	0.151561	0.998485	1.01876	0.688149	0.957087	-1.01835	0.617337	0.998969	1.00269	0.950085	0.99602	-0.541161	0.106221	0.59721	0.0683006	0.0702698	0.847042
ubhEFSgX5qYd0.OCgU	ILMN_3079138	ANK2	1.00679	0.84753	0.998485	NA	NA	NA	-1.00919	0.690324	0.998969	1.00101	0.954679	0.99602	-0.0190954	0.958244	NA	NA	-0.0336072	0.926567
9VJv_1LF0S.SliUsgo	ILMN_3158444	ANK2	1.06531	0.242063	0.998485	1.01951	0.36954	0.899257	1.00909	0.694552	0.998969	1.01374	0.447597	0.880766	-0.808749	0.004614	0.489677	0.150837	0.122155	0.736737
QUfrTHlLPiAdFIjSSg	ILMN_1227817	ANK3	1.03598	0.521232	0.998485	1.04013	0.57152	0.935687	-1.00743	0.891049	0.998969	-1.093	0.00424283	0.262212	-0.150424	0.678293	0.277409	0.437751	-0.620395	0.0556536
rHh_Uv6Se7oHqb1OM0	ILMN_2771712	ANKFY1	1.01992	0.619465	0.998485	1.01968	0.420012	0.90753	1.01375	0.690365	0.998969	-1.02644	0.286313	0.794021	-0.257808	0.472057	0.112941	0.756069	-0.172218	0.63425
Ki.xWJTfnZU.wFcJ5c	ILMN_2737158	ANKLE2	1.02373	0.606905	0.998485	1.03668	0.42106	0.90753	-1.01279	0.636159	0.998969	-1.0334	0.247003	0.766657	-0.431559	0.213009	-0.201277	0.577114	-0.100608	0.782133
oxWJTfnZU.wFcJ5f6E	ILMN_2916686	ANKLE2	-1.00141	0.97506	0.998485	1.05483	0.169136	0.869529	1.00553	0.817299	0.998969	-1.03459	0.222514	0.747738	-0.526995	0.117537	0.196874	0.585645	-0.698447	0.0246599
ieT.S7apOwkCei7Xt0	ILMN_2663741	ANKMY2	1.00107	0.980497	0.998485	1.02738	0.36303	0.899257	1.00917	0.741412	0.998969	1.00609	0.811336	0.975516	-0.725695	0.0175115	0.666085	0.035484	0.024397	0.946663
NKeluPXjBDdAu7V558	ILMN_2599514	ANKMY2	-1.05267	0.0422878	0.998485	1.00717	0.786739	0.97304	1.00606	0.737858	0.998969	1.04665	0.0165702	0.389168	-0.498642	0.14237	0.507869	0.133966	0.101291	0.780686
fo757_yge2rSDP8c64	ILMN_2624749	ANKRD10	1.00607	0.917752	0.998485	1.10195	0.174171	0.874418	-1.0265	0.688453	0.998969	1.00728	0.782379	0.968782	-0.707997	0.0219614	0.298334	0.402442	-0.173922	0.630846
6E6IGlLo7pIhIovovk	ILMN_3151492	ANKRD12	-1.00661	0.963406	0.998485	1.0215	0.849699	0.980268	1.01101	0.887343	0.998969	1.0065	0.872689	0.985484	0.504406	0.137083	0.325	0.359517	-0.125541	0.729666
Td5eh3scZP13kZTajI	ILMN_3072676	ANKRD12	1.00866	0.74286	0.998485	1.12905	0.0536859	0.865421	-1.00139	0.960113	0.998969	1.01797	0.510009	0.900776	-0.282263	0.4618	0.469968	0.170502	-0.0475731	0.896169
ccFdewMXHkwSVBV6oE	ILMN_2613696	ANKRD13A	1.05489	0.13286	0.998485	-1.02913	0.474995	0.915974	1.00246	0.93225	0.998969	-1.00325	0.89713	0.987968	0.0527702	0.884886	-0.109195	0.763965	0.424257	0.221716
KrnBVp3V.1FcVFwIJE	ILMN_1247053	ANKRD13B	1.00841	0.773835	0.998485	1.04483	0.241564	0.883779	1.02135	0.337694	0.998969	-1.03041	0.233311	0.757534	-0.0574403	0.874763	-0.186979	0.604986	0.405141	0.245455
Kt9CoEoovomGq0koII	ILMN_2851735	ANKRD13D	1.02124	0.761372	0.998485	-1.06338	0.177645	0.875762	-1.01654	0.575993	0.998969	-1.02563	0.512216	0.900776	0.565991	0.0880973	-0.195752	0.587827	0.0774685	0.831551
HwyL6IEhHHSrueUbuI	ILMN_3126458	ANKRD17	-1.01381	0.58168	0.998485	1.01979	0.39174	0.901856	1.03704	0.132247	0.998969	1.01794	0.417447	0.866725	0.393971	0.259957	0.0953514	0.793305	-0.0235922	0.948421
NtX5dSrU2QN8SB9Ci4	ILMN_1221440	ANKRD17	1.01263	0.691731	0.998485	-1.0093	0.662098	0.954115	-1.03266	0.150861	0.998969	-1.00422	0.809246	0.975109	-0.769578	0.00923961	-0.198061	0.583342	-0.011983	0.973791
QuIzsX0z0gN6O3X0xM	ILMN_2675464	ANKRD17	-1.02117	0.629772	0.998485	-1.04725	0.57435	0.936104	1.00078	0.993616	0.999288	1.01495	0.631333	0.935008	-0.131242	0.736444	0.309457	0.384248	0.137032	0.705809
Q4KKd4K5JLUVSUnUKI	ILMN_1252105	ANKRD24	-1.08897	0.00534159	0.896559	-1.04798	0.0815623	0.865421	1.0119	0.623358	0.998969	1.03282	0.0964081	0.608755	0.871366	0.00102267	0.0520913	0.886359	-0.0854507	0.814435
TKE1KiHOoKjILuVjfk	ILMN_2738481	ANKRD27	1.00206	0.933895	0.998485	1.01647	0.549088	0.931317	1.01875	0.369568	0.998969	-1.02929	0.170352	0.702827	-0.19253	0.594108	-0.629727	0.0510362	-0.0187533	0.958991
HUqIc6gqMgu5WN_Shs	ILMN_2638866	ANKRD27	1.03023	0.36439	0.998485	1.00716	0.660765	0.953909	-1.00676	0.710417	0.998969	NA	NA	NA	-0.496663	0.144213	-0.331254	0.349795	0.676183	0.0455339
x_5yrVIdE.vWCSSolU	ILMN_3020599	ANKRD34A	1.02272	0.66131	0.998485	1.02924	0.397406	0.902716	-1.00767	0.782035	0.998969	1.0043	0.872126	0.985484	0.251918	0.482591	0.148198	0.682843	0.260166	0.467869
QTdRMSi03Hg552qcTo	ILMN_3157692	ANKRD35	-1.01531	0.590716	0.998485	-1.02698	0.374256	0.899257	-1.01271	0.68994	0.998969	-1.03841	0.107841	0.625834	-0.0297678	0.934941	0.0887796	0.807318	0.0992662	0.784982
6QlPn_nTROOAdeKKAE	ILMN_2595857	ANKRD37	1.01977	0.702396	0.998485	1.06784	0.057335	0.865421	1.03894	0.184638	0.998969	-1.01001	0.623131	0.932416	0.0985768	0.786446	-0.172635	0.633415	-0.0833533	0.818926
HnLankRe3_H9c.OVPY	ILMN_1253761	ANKRD39	1.0304	0.331564	0.998485	-1.00525	0.876487	0.982265	1.0675	0.00671884	0.998969	-1.0086	0.733515	0.958545	-0.40038	0.25158	0.359195	0.308031	0.369933	0.292718
c6lAoQlPjVAl2zlRSo	ILMN_2681592	ANKRD40	1.01349	0.71263	0.998485	-1.00293	0.928977	0.993023	1.02769	0.376993	0.998969	-1.02498	0.395766	0.855399	0.190747	0.597595	0.0111017	0.975718	-0.136144	0.707644
N5Vd5THyBFICRAF614	ILMN_3109098	ANKRD40	1.01228	0.636409	0.998485	1.0119	0.60196	0.942282	1.01941	0.379218	0.998969	1.01266	0.56601	0.914342	-0.266741	0.456278	-0.120593	0.740006	0.601423	0.0658751
3NJ_S7fn.Bw07_shko	ILMN_1222794	ANKRD46	1.02432	0.651339	0.998485	-1.0472	0.421533	0.90753	1.00529	0.92832	0.998969	1.01009	0.764247	0.964435	-0.559723	0.09247	0.318668	0.369493	0.0929038	0.798518
WtSRzVRpXT.cQlOECg	ILMN_2592358	ANKRD49	-1.01487	0.649146	0.998485	1.01286	0.695423	0.957376	-1.02981	0.234635	0.998969	-1.03436	0.238716	0.761615	-0.0645221	0.859444	0.739238	0.0145604	-0.0880704	0.808833
fSRJVTngkt1FEWDA5I	ILMN_3160568	ANKRD50	1.02018	0.479568	0.998485	-1.02325	0.252246	0.883779	1.00007	0.997392	0.999546	-1.01605	0.465551	0.887308	-0.697038	0.0250764	0.0540797	0.882046	-0.254697	0.477608
o2CeBNcSirT1S7eils	ILMN_2722184	ANKRD54	1.00812	0.750879	0.998485	-1.00286	0.907117	0.987945	-1.01556	0.490124	0.998969	-1.0291	0.144686	0.675683	0.0358294	0.921724	-0.288528	0.418815	-0.0278917	0.939034
9p0rXzVKNdwl8rvukI	ILMN_2872599	ANKRD54	1.03078	0.442316	0.998485	-1.05659	0.115834	0.865421	-1.01367	0.679592	0.998969	1.02628	0.253464	0.771132	-0.00877054	0.980816	0.0851995	0.814973	0.0768188	0.832947
6VWQ0eARxg6m1v_SVI	ILMN_2600078	ANKRD54	1.02095	0.39332	0.998485	NA	NA	NA	NA	NA	NA	1.03991	0.0286434	0.451545	0.117287	0.746935	NA	NA	NA	NA
loIpw1_StXp4K4d7hU	ILMN_2946760	ANKRD56	-1.00088	0.987133	0.998485	-1.02364	0.782381	0.972711	-1.01021	0.847717	0.998969	-1.04823	0.186346	0.715301	-0.169229	0.640233	-0.129309	0.721818	0.280264	0.432851
KULBrtUovr7RlQrofk	ILMN_2630789	ANKRD6	1.0322	0.379892	0.998485	1.03884	0.0873857	0.865421	-1.04948	0.0492324	0.998969	-1.02539	0.240625	0.763933	-0.172132	0.634422	0.276758	0.438871	0.00849303	0.981423
9oKdx7sdyHt0lF4veo	ILMN_3103575	ANKRD6	1.02076	0.753927	0.998485	1.03942	0.286112	0.891024	-1.04515	0.245597	0.998969	1.04535	0.308645	0.805783	0.113612	0.754656	0.248539	0.519024	-0.142317	0.694911
lSJ4vKdrkowLgZgnqU	ILMN_1235975	ANKRD6	-1.01224	0.548519	0.998485	NA	NA	NA	NA	NA	NA	NA	NA	NA	-0.656082	0.0549863	NA	NA	NA	NA
QID13XXWrq3df9KELk	ILMN_1220446	ANKS1	-1.03148	0.38742	0.998485	-1.03569	0.13571	0.865421	1.02837	0.241641	0.998969	1.00548	0.776794	0.967214	-0.127188	0.726234	-0.279895	0.433483	-0.124815	0.731181
xSuUx4reN8SEK3quXI	ILMN_2735877	ANKS3	-1.02879	0.43754	0.998485	1.00836	0.775954	0.972372	-1.09255	0.00940862	0.998969	1.00058	0.988571	0.998221	-0.335798	0.342817	-0.276936	0.438564	-0.0899113	0.804901
u4l1eL7SiV6CFu1OI4	ILMN_2788154	ANKS3	-1.0093	0.737832	0.998485	1.06329	0.0348979	0.865421	1.00374	0.87693	0.998969	-1.00092	0.9551	0.99602	0.0786868	0.828934	0.283411	0.42748	0.133879	0.712333
cKte.Xu4F9XcLWkhGk	ILMN_2906688	ANKS6	-1.02513	0.26683	0.998485	1.03322	0.188857	0.875854	-1.02637	0.150967	0.998969	1.00943	0.585353	0.919087	0.187039	0.629902	0.33869	0.372624	-0.460471	0.212279
6Yqbj36Aj.1_UhzNzw	ILMN_2612904	ANKS6	-1.00689	0.889352	0.998485	-1.00644	0.844982	0.979507	1.0214	0.448036	0.998969	-1.00672	0.714575	0.95537	-0.661545	0.0372218	0.240481	0.503329	-0.0500284	0.890836
fl9iFNktKaohfTfj98	ILMN_1259463	ANKZF1	-1.00365	0.877565	0.998485	1.0073	0.81132	0.976557	-1.039	0.107285	0.998969	1.06602	0.0208037	0.425523	-0.236626	0.510402	0.056145	0.877569	0.106203	0.770283
ZXInd9ddOCfhP6COro	ILMN_2703321	ANKZF1	-1.02576	0.553635	0.998485	1.02021	0.497775	0.919326	-1.03631	0.221396	0.998969	-1.00878	0.782333	0.968782	-0.578027	0.0800781	0.502402	0.138907	0.267627	0.454726
f_fVIvXt4rX9O.NzhE	ILMN_2595597	ANLN	-1.01139	0.902719	0.998485	-1.14553	0.324878	0.895167	1.02786	0.659865	0.998969	-1.03483	0.284456	0.792316	-0.535953	0.110297	-0.216418	0.548143	-0.151244	0.676619
B3R2hXVKlkRFdSe.TQ	ILMN_1223335	ANO10	-1.00915	0.783074	0.998485	-1.08734	0.018264	0.865421	1.03793	0.211961	0.998969	1.01519	0.538076	0.905487	0.168597	0.6415	-0.590661	0.072185	-0.0603456	0.868474
WpR6F66woICte1K.t4	ILMN_2802590	ANO2	NA	NA	NA	1.20251	0.000523356	0.468978	NA	NA	NA	NA	NA	NA	NA	NA	-0.523594	0.120361	NA	NA
fI6WHiui1Z77gNGeS0	ILMN_2973774	ANO4	-1.04093	0.351611	0.998485	-1.01631	0.738523	0.966315	1.00992	0.715854	0.998969	-1.00429	0.875127	0.985484	-0.170371	0.637944	0.492398	0.148236	-0.193928	0.591379
0Xv6oD1z7j_Hv.FTNU	ILMN_1230271	ANP32A	-1.22318	0.000772059	0.500429	-1.01249	0.753655	0.96795	-1.0432	0.447742	0.998969	1.04559	0.0911265	0.604039	-0.374431	0.286427	0.184178	0.610501	-0.202693	0.574381
6V5t0_sSBB5R0.91ZU	ILMN_1222637	ANP32A	-1.12226	0.0636314	0.998485	1.1401	0.00911267	0.844109	-1.02369	0.554482	0.998969	-1.02084	0.603261	0.928591	0.201427	0.576825	-0.433501	0.210727	-0.265853	0.457837
fF2OnOEqEEKKVWHWO8	ILMN_2685507	ANP32A	-1.28527	0.00306462	0.807795	-1.00959	0.810017	0.976557	-1.00714	0.793241	0.998969	-1.00145	0.961625	0.996612	-0.0832562	0.819134	-0.335025	0.344	-0.129464	0.721497
Wo_n_.X79LD6B157S0	ILMN_2723788	ANP32E	1.02429	0.697162	0.998485	1.0048	0.892655	0.984654	-1.00403	0.900602	0.998969	-1.06057	0.143757	0.675683	0.122515	0.735985	0.0321096	0.929833	0.384437	0.272697
9mQKg9Oe7AuroPb_Qk	ILMN_1229643	ANTXR1	-1.03045	0.451527	0.998485	-1.00339	0.919039	0.991608	-1.00665	0.747655	0.998969	1.01209	0.52612	0.902691	0.408681	0.240956	0.797234	0.00574351	-0.192924	0.593339
9hYS9KZAqD057sC6ug	ILMN_1226183	ANTXR1	-1.02567	0.480792	0.998485	-1.03311	0.337474	0.898633	1.00368	0.892623	0.998969	1.02709	0.297894	0.800704	-0.225225	0.531561	0.301595	0.397066	-0.142087	0.695384
TqKX7hrHuu3rgDu04o	ILMN_3107156	ANXA11	1.07042	0.309197	0.998485	-1.10799	0.176108	0.875762	1.06523	0.102616	0.998969	-1.03539	0.423846	0.870002	0.109369	0.763597	-0.354686	0.314585	-0.0777768	0.842351
0qbJt7hOIR9d87Hu24	ILMN_2657175	ANXA2	-1.06522	0.25688	0.998485	-1.22205	0.0917733	0.865421	-1.00351	0.948842	0.998969	1.10568	0.00605168	0.283059	-0.214645	0.551505	-0.380055	0.278665	0.24422	0.496507
BleOuhZdAN3kR5.Tkk	ILMN_3135781	ANXA3	-1.02298	0.560984	0.998485	-1.05024	0.261058	0.886136	1.04411	0.24149	0.998969	1.07358	0.0115972	0.360287	-0.512078	0.130236	-0.502419	0.138892	0.254821	0.477387
fhIF7eXjKT6Tb0uQ6Q	ILMN_1241171	ANXA3	-1.02028	0.683547	0.998485	-1.01916	0.665233	0.955814	-1.00863	0.748057	0.998969	1.06001	0.103757	0.622341	-0.270368	0.449939	-0.0968465	0.790124	0.257831	0.472016
EUCu3yOAku1ZX3jve0	ILMN_2680142	ANXA5	1.04569	0.352575	0.998485	-1.19591	0.166539	0.869529	1.03392	0.249985	0.998969	1.02301	0.384942	0.850434	-0.172781	0.633124	-0.224555	0.532815	-0.212729	0.555147
rn_fne7poihwJ14XSI	ILMN_2878060	ANXA6	1.03479	0.405251	0.998485	-1.05643	0.177742	0.875762	-1.00243	0.960573	0.998969	1.02117	0.425188	0.870002	0.447428	0.194775	0.0566032	0.876576	-0.0398063	0.913062
oiKg0r3l5X3gTTo_gU	ILMN_2625920	AOC3	NA	NA	NA	NA	NA	NA	1.01757	0.391607	0.998969	1.01213	0.601825	0.92748	NA	NA	NA	NA	0.393462	0.260628
QA57CW61NUvly5_q9Q	ILMN_2640097	AOX3	NA	NA	NA	NA	NA	NA	NA	NA	NA	1.02512	0.219948	0.744184	NA	NA	NA	NA	NA	NA
ii9_e1uAHzurpX9jN4	ILMN_1245471	AP1AR	1.10079	0.0390137	0.998485	1.06504	0.179126	0.875762	1.01315	0.741355	0.998969	1.02686	0.32343	0.817104	-0.616974	0.0574135	-0.441693	0.201256	-0.420231	0.226603
Qp1S3u7uEnNe0ee.jA	ILMN_1244906	AP1B1	1.01097	0.89195	0.998485	-1.02816	0.415237	0.906111	-1.00624	0.806032	0.998969	1.00891	0.777564	0.967583	-0.481738	0.158585	0.455781	0.185558	-0.0293716	0.940208
iId7RAEW6VMoIkhUh0	ILMN_3071104	AP1G1	1.017	0.613927	0.998485	-1.00442	0.88848	0.983911	1.01053	0.568499	0.998969	-1.01518	0.595067	0.923537	-0.211423	0.557637	0.427416	0.217925	-0.00168623	0.996311
ZqdpDkI3JILgQ.VV0s	ILMN_2745354	AP1G1	1.02074	0.357221	0.998485	1.00952	0.694359	0.957376	-1.00177	0.917639	0.998969	-1.01608	0.426654	0.870404	-0.264034	0.461034	-0.535047	0.111017	0.57062	0.084955
cXSX_VwD16kpEpxXR4	ILMN_2984647	AP1M1	1.04239	0.575842	0.998485	-1.05467	0.215309	0.883043	-1.01039	0.64348	0.998969	1.01032	0.714308	0.955334	-0.511023	0.131164	-0.316413	0.373079	-0.193878	0.617198
3d0XdVSFX3foqHaef8	ILMN_1215903	AP1S1	1.05331	0.238122	0.998485	1.07099	0.277397	0.891024	1.10278	0.0253249	0.998969	-1.0142	0.613258	0.929414	0.120656	0.739875	-0.385192	0.271676	-0.0228251	0.950096
ogqKABuF6OqudLp9T8	ILMN_2634108	AP1S1	1.09272	0.0558988	0.998485	1.20549	0.0073549	0.819637	-1.02759	0.532807	0.998969	-1.0352	0.168045	0.699362	0.417523	0.263504	-0.591254	0.0718273	-0.114622	0.752534
99B.iAlx.Nehi.eOro	ILMN_2748777	AP1S1	1.19857	2.23263e-05	0.135353	1.09715	0.125754	0.865421	1.0112	0.821143	0.998969	-1.01151	0.845461	0.984077	0.631885	0.0679077	-0.29554	0.407076	-0.287166	0.421114
iwV5kUkCJe3VtH7uJ4	ILMN_3143246	AP2A1	1.05521	0.604583	0.998485	-1.0406	0.287572	0.891024	1.03149	0.620422	0.998969	-1.03414	0.294661	0.798542	0.514239	0.128346	-0.0073187	0.983991	0.296811	0.404966
WFeIH_6ueg01IYKV5I	ILMN_2604688	AP2A1	1.06327	0.50997	0.998485	-1.05429	0.127774	0.865421	1.01499	0.754073	0.998969	1.04485	0.153897	0.685123	0.478367	0.161944	-0.0496749	0.891604	0.0908169	0.802969
0IeJ7Oq03sbESS77tU	ILMN_1237891	AP2A2	1.08207	0.108482	0.998485	1.11616	0.246572	0.883779	1.04477	0.382992	0.998969	-1.0007	0.983214	0.998221	-0.634459	0.0487951	-0.553782	0.12187	-0.0105876	0.976842
ldfJQLube2AnguSKko	ILMN_3147944	AP2B1	-1.18696	0.116557	0.998485	1.022	0.810138	0.976557	-1.1377	0.00116383	0.998969	1.02959	0.505049	0.900776	-0.0170726	0.962665	0.280683	0.432134	0.734185	0.0156173
ohIf5TUvwQgyfa7TVA	ILMN_2711007	AP2B1	1.02421	0.46233	0.998485	1.00719	0.753672	0.96795	1.02913	0.171838	0.998969	1.01134	0.663615	0.940675	-0.192103	0.594942	-0.090542	0.803555	-0.0719696	0.843379
NhLX01bTS5eYX2dfRc	ILMN_1259631	AP2B1	1.00967	0.705035	0.998485	1.00158	0.95144	0.994451	1.01353	0.570219	0.998969	1.00279	0.887126	0.986418	-0.254088	0.478699	-0.192631	0.59391	-0.542988	0.104814
N4SH_U1L8EIMn2u01Q	ILMN_1252951	AP2B1	1.05079	0.0904042	0.998485	1.00617	0.79232	0.973843	1.0096	0.62001	0.998969	1.02542	0.215501	0.739621	-0.0444942	0.902861	-0.17444	0.629813	0.278065	0.468771
lIui_enA7w6pWSKt4Y	ILMN_1227300	AP2M1	1.05462	0.203146	0.998485	1.01594	0.632663	0.949555	1.01242	0.675733	0.998969	1.0257	0.486089	0.895877	-0.170796	0.637093	-0.056977	0.875767	0.16308	0.652599
icWGcZ6XcfeTebo7QY	ILMN_2762255	AP2S1	-1.06348	0.344609	0.998485	-1.03142	0.421886	0.90753	-1.04432	0.0324139	0.998969	-1.00174	0.95389	0.99602	0.435131	0.208822	-0.109973	0.762323	-0.255451	0.476259
9I716SiI1iIUlIYK54	ILMN_1212941	AP2S1	-1.0902	0.331198	0.998485	-1.04953	0.285792	0.891024	1.04928	0.245656	0.998969	-1.04689	0.114676	0.636307	0.504754	0.136768	-0.254083	0.478706	-0.00790775	0.982703
u1fXSelSKChWkq3KUQ	ILMN_2911283	AP2S1	-1.03761	0.550052	0.998485	-1.00369	0.930252	0.993138	1.03603	0.249143	0.998969	1.03759	0.17778	0.709598	0.491666	0.148933	-0.282393	0.429215	0.244232	0.496486
rLoHgoKdRJUnzTQRYg	ILMN_1236150	AP3B1	-1.00191	0.929673	0.998485	1.04313	0.0837399	0.865421	1.00332	0.893575	0.998969	-1.01967	0.300078	0.800909	0.117291	0.746927	-0.21076	0.558901	0.307522	0.387385
lp1ElSfNNBFiAFuPr0	ILMN_2610861	AP3B1	1.02667	0.332147	0.998485	1.00734	0.760845	0.969424	1.00243	0.9127	0.998969	-1.01922	0.468373	0.888147	-0.524898	0.119273	0.403562	0.247477	-0.210003	0.560348
iSneFS4fdJHvFR430U	ILMN_3009184	AP3B2	1.00206	0.97087	0.998485	-1.02038	0.683007	0.957087	-1.02272	0.648143	0.998969	1.00204	0.947012	0.995543	0.0479418	0.895368	0.166593	0.645523	0.0301767	0.934049
cJ7oqfLl_S6Iu5Neok	ILMN_2953301	AP3D1	-1.00089	0.991652	0.998928	1.02131	0.664712	0.955814	1.0117	0.715495	0.998969	1.01818	0.580595	0.917535	0.425801	0.219859	0.341065	0.334819	0.312469	0.379392
lEeut3HAPKu3clKK4U	ILMN_2454307	AP3M1	-1.04236	0.0730382	0.998485	-1.01534	0.475935	0.915974	1.05888	0.00945094	0.998969	-1.05305	0.0218046	0.432703	-0.0800452	0.826019	0.0742952	0.838373	-0.291696	0.413492
NTqx5Ql2UFUVLj7SQI	ILMN_2912598	AP3M2	-1.00616	0.930525	0.998485	1.00207	0.979968	0.997519	-1.03119	0.575563	0.998969	-1.05365	0.024161	0.443045	-0.369477	0.29336	-0.293692	0.410155	-0.0639252	0.860734
TsLhOlCo4iwKEl6kKk	ILMN_2922544	AP3S2	-1.03124	0.282572	0.998485	1.0226	0.330995	0.896238	-1.03399	0.157421	0.998969	1.06733	0.00619828	0.284623	0.698045	0.0247781	-0.361731	0.304377	0.321357	0.365239
KiIp7f51Ht.hTV4S50	ILMN_1244074	AP3S2	1.03486	0.469699	0.998485	-1.02148	0.532963	0.928637	-1.0091	0.746376	0.998969	-1.02025	0.455242	0.884316	-0.329146	0.353057	0.202241	0.575253	0.154137	0.670722
ZpCh4NXk6.797XoB7g	ILMN_2757861	AP4B1	1.03174	0.274667	0.998485	1.01069	0.666839	0.955814	1.01125	0.587939	0.998969	1.00161	0.945292	0.994648	-0.742427	0.0139198	-0.197901	0.583651	-0.349942	0.321557
WlEkGXGw9o.gnVQkKM	ILMN_2599667	AP4M1	-1.01466	0.549214	0.998485	1.03673	0.0923062	0.865421	1.01348	0.542323	0.998969	-1.00454	0.807767	0.975089	-0.179623	0.619509	0.613208	0.0593925	0.0245289	0.946375
rqBTdGQ7pn7cYHXo4I	ILMN_2692762	AP4M1	-1.00305	0.889103	0.998485	NA	NA	NA	NA	NA	NA	1.00778	0.716511	0.955938	-0.239049	0.505951	NA	NA	NA	NA
lKd0HdaX.Ujo7V6fko	ILMN_2856646	AP4M1	-1.02218	0.297929	0.998485	NA	NA	NA	NA	NA	NA	NA	NA	NA	0.0627021	0.863377	NA	NA	NA	NA
9iUg9_Vd549_EJ7aAk	ILMN_2805071	AP4S1	-1.04645	0.40029	0.998485	1.03979	0.159136	0.869529	1.00238	0.91547	0.998969	1.00666	0.783784	0.968871	0.487124	0.153303	-0.271335	0.448257	-0.313149	0.378301
Wd6e0u3uD6kUFF_R38	ILMN_1228561	APAF1	1.02625	0.275682	0.998485	1.03126	0.0952925	0.865421	-1.01541	0.351172	0.998969	1.01298	0.439363	0.87494	0.192661	0.593851	0.0410411	0.910374	0.210004	0.560345
W53ppeThR_6V.X54H8	ILMN_3143577	APAF1	-1.02483	0.581434	0.998485	1.03457	0.241384	0.883779	-1.0226	0.408103	0.998969	1.00973	0.613916	0.929414	-0.455543	0.185816	-0.437918	0.205589	-0.179398	0.619955
W1unuAotVXuOSeSX.c	ILMN_2846507	APBA2	-1.00535	0.933203	0.998485	-1.02848	0.682552	0.957087	1.06384	0.184686	0.998969	-1.05031	0.09407	0.606659	0.573412	0.083095	0.0283833	0.937962	-0.171917	0.634851
Z.6u6626DanqnU15Uc	ILMN_1244923	APBA2	1.17842	0.0608029	0.998485	1.01898	0.790768	0.973843	1.04433	0.44384	0.998969	-1.07028	0.0265084	0.449453	0.190016	0.599025	0.132154	0.734665	0.170427	0.637832
B54m66LWb6EWTT4rQY	ILMN_2660110	APBA3	1.05611	0.0386815	0.998485	-1.01666	0.524586	0.926838	-1.01301	0.6277	0.998969	1.03528	0.18963	0.719268	0.618916	0.0564103	-0.452866	0.188745	-0.443767	0.198898
0Uu.isiQigetQlKVTU	ILMN_2623591	APBB1	1.00791	0.851973	0.998485	-1.03282	0.58195	0.938665	1.06074	0.231167	0.998969	-1.02651	0.394835	0.855186	-0.267321	0.455261	-0.0950186	0.794013	-0.0629371	0.862869
TUhLvIQk7hdt_WUU7g	ILMN_2850450	APBB2	1.01857	0.629509	0.998485	-1.03552	0.277109	0.891024	1.03411	0.411288	0.998969	-1.02237	0.490041	0.895877	0.299741	0.400119	0.0950386	0.793971	0.165024	0.648681
6v778zo4eIpXkewfKU	ILMN_1223271	APBB3	-1.00345	0.909758	0.998485	-1.00142	0.949797	0.994451	1.02128	0.373652	0.998969	-1.02808	0.243881	0.764484	-0.405526	0.244964	0.164525	0.649685	0.181623	0.615549
ZibFX9L1LJ1JCRJ0XI	ILMN_2655204	APC	-1.01485	0.680873	0.998485	-1.03555	0.333579	0.896238	1.03112	0.346872	0.998969	-1.0058	0.801953	0.973407	0.340281	0.336003	-0.0693385	0.85931	0.163124	0.65251
ZInhiV8j0iSiq3nJZQ	ILMN_2820314	APC2	-1.02347	0.51195	0.998485	-1.02236	0.439543	0.913041	1.02981	0.201865	0.998969	-1.01898	0.535948	0.905487	0.375377	0.285114	0.176981	0.624754	0.0897147	0.805321
idQuBQ1Xu16dEe68q4	ILMN_2965660	APCDD1	1.02989	0.456984	0.998485	1.01902	0.566995	0.934588	-1.01535	0.561218	0.998969	1.05976	0.0399895	0.497026	0.413418	0.235009	-0.0518388	0.886907	0.505643	0.135965
9r9ep3odYOLqSKHOh0	ILMN_1250816	APEH	-1.036	0.568407	0.998485	-1.02539	0.807116	0.97611	-1.04226	0.315402	0.998969	1.00916	0.801176	0.973115	-0.323462	0.361926	-0.342888	0.332072	-0.240799	0.502748
cLd86T6YoIE40IKWrg	ILMN_2918114	APEX1	-1.05223	0.0589913	0.998485	1.0412	0.221193	0.88352	-1.00631	0.814342	0.998969	1.03409	0.149696	0.680331	0.594326	0.0699938	-0.414364	0.233831	0.114468	0.752857
xeUdBISKB3VHfgJRAA	ILMN_1232821	APH1A	-1.0194	0.574809	0.998485	-1.00581	0.77393	0.972372	1.02655	0.207192	0.998969	-1.00174	0.929979	0.992323	0.357362	0.310686	0.782697	0.00743464	-0.414496	0.233667
W_KPLyDoj9eOFFdI7g	ILMN_2588682	APH1B	-1.02062	0.628589	0.998485	1.06441	0.307184	0.891024	-1.0148	0.800715	0.998969	1.02037	0.527187	0.902691	-0.402888	0.248344	0.418765	0.228397	0.00616146	0.986522
lQokVWPXjVIH_QEv8U	ILMN_1244908	APIP	-1.02534	0.516334	0.998485	-1.01586	0.642906	0.94997	1.01243	0.624207	0.998969	1.03535	0.0373111	0.489784	0.208024	0.564133	-0.673534	0.0327525	-0.164687	0.64936
xVL6IA6D7sJQujlwk0	ILMN_1234781	APIP	-1.02544	0.358489	0.998485	NA	NA	NA	-1.01211	0.657881	0.998969	NA	NA	NA	-0.345151	0.32868	NA	NA	0.287246	0.420979
KRqkygKfkfq6RJuHy4	ILMN_2983714	APITD1	-1.0352	0.1645	0.998485	-1.05129	0.0394852	0.865421	1.03479	0.176526	0.998969	-1.00436	0.827823	0.978515	0.505674	0.135937	-0.62717	0.0522748	-0.494312	0.146423
xlE5.fbP7i3dTsPkSo	ILMN_2630884	APLF	-1.02076	0.400248	0.998485	-1.02709	0.255261	0.884118	1.00199	0.928876	0.998969	-1.00384	0.842638	0.982945	-0.502575	0.13875	-0.159083	0.66068	-0.175828	0.627049
9TpziBVFxZ9eggYX4U	ILMN_2696532	APLP1	1.01415	0.826152	0.998485	1.03533	0.509296	0.920195	-1.01684	0.661783	0.998969	-1.01411	0.579414	0.917053	0.437607	0.205948	0.417297	0.230201	-0.174625	0.629445
xpXJbl21RzkSPgH0XE	ILMN_1216689	APLP2	1.02715	0.719217	0.998485	-1.04342	0.174394	0.874418	-1.02427	0.390438	0.998969	-1.03029	0.211284	0.73567	-0.460547	0.180416	-0.483012	0.187806	-0.258067	0.471596
lxRFKlAFReCEfpiAlI	ILMN_2623393	APOA1	-1.00544	0.824386	0.998485	NA	NA	NA	NA	NA	NA	NA	NA	NA	0.640442	0.0460567	NA	NA	NA	NA
ZfafS.Qq4b2olPUSTU	ILMN_2997923	APOA1BP	-1.02793	0.716236	0.998485	-1.02789	0.502412	0.919326	1.04208	0.272994	0.998969	1.0353	0.228163	0.753342	0.318097	0.3704	-0.745159	0.013387	-0.158726	0.661404
leXpdQKcw6TEktUqTw	ILMN_1257631	APOBEC1	NA	NA	NA	NA	NA	NA	NA	NA	NA	-1.00563	0.736922	0.95932	NA	NA	NA	NA	NA	NA
ZAuCiC_CFG914kXpqU	ILMN_2599794	APOC1	NA	NA	NA	-1.06667	0.342643	0.898965	NA	NA	NA	NA	NA	NA	NA	NA	-0.344543	0.32959	NA	NA
i.64WTWKmnooLqQUpU	ILMN_1216042	APOE	-1.03672	0.526328	0.998485	1.00854	0.904198	0.987166	1.00274	0.957698	0.998969	1.03108	0.358215	0.839068	0.449449	0.192521	-0.399914	0.252183	0.366444	0.297647
Eml3gfoSYBT59HFTa4	ILMN_2597532	APP	1.13269	0.0382709	0.998485	1.02858	0.551058	0.931317	-1.02364	0.502236	0.998969	-1.06637	0.0648251	0.561077	-0.362027	0.303953	0.27086	0.449083	-0.142728	0.694065
cLUVCFc.astez5L17I	ILMN_2724868	APPBP2	1.03281	0.673965	0.998485	-1.02889	0.661536	0.954106	1.05205	0.198809	0.998969	-1.02755	0.397451	0.856048	-0.601388	0.0658954	0.435136	0.208816	-0.0510307	0.888661
9vnn.4vdP1eo7pEmzU	ILMN_1237942	APPL1	-1.01766	0.668544	0.998485	1.00528	0.859106	0.980906	1.04006	0.241377	0.998969	-1.0393	0.221964	0.746585	-0.674875	0.0322767	-0.0698107	0.848031	-0.131764	0.716719
EX47969uq16FDdQVcM	ILMN_1219978	APPL2	-1.03699	0.450499	0.998485	-1.02941	0.576207	0.936305	-1.04431	0.316567	0.998969	1.02918	0.319225	0.815096	-0.58153	0.0778368	0.732183	0.0160504	0.278083	0.436591
37zR09f60njWW5e6FU	ILMN_2630946	APRT	-1.11099	0.194092	0.998485	1.09375	0.114108	0.865421	1.03485	0.287398	0.998969	1.03057	0.329372	0.822058	0.405053	0.245567	-0.455554	0.185805	0.238108	0.507678
fpAlp_IdA5GOyCSKPo	ILMN_2619307	APTX	-1.04143	0.185884	0.998485	-1.01797	0.5684	0.934588	-1.04668	0.191807	0.998969	-1.03691	0.250229	0.769133	0.205604	0.568777	-0.0234841	0.948657	0.475322	0.195968
uICK0h7jLiiOgni3qE	ILMN_2675681	APTX	1.0059	0.834041	0.998485	-1.041	0.159508	0.869529	1.00379	0.875927	0.998969	1.01066	0.603944	0.928591	0.0198695	0.959536	-0.477697	0.162618	-0.218898	0.543453
cVJnpH93kf1uf4YHfc	ILMN_1225901	AQP11	1.00325	0.930952	0.998485	-1.04807	0.148763	0.866502	1.05051	0.128657	0.998969	-1.00827	0.721429	0.957097	0.678847	0.030894	-0.135104	0.709797	-0.140223	0.699222
BuSJM6EXe4oJ6T7U20	ILMN_2757232	AQP4	1.02228	0.752658	0.998485	-1.08601	0.387479	0.899627	-1.07551	0.135518	0.998969	1.05709	0.143294	0.675683	-0.455633	0.185719	0.615391	0.0582402	-0.0490166	0.893033
KSRJeoT1PzAdwuK8X8	ILMN_2925196	AQR	1.0008	0.986669	0.998485	-1.01906	0.694111	0.957376	1.01063	0.823467	0.998969	-1.00136	0.966894	0.997473	-0.426241	0.21933	-0.00867479	0.981025	0.0504893	0.889836
rVSOmB.uxBOzOTeMSE	ILMN_2676056	AQR	-1.02147	0.403164	0.998485	NA	NA	NA	1.00204	0.923073	0.998969	NA	NA	NA	-0.422774	0.223509	NA	NA	-0.465898	0.174745
Wkcfd5Ll_qgPXceOxI	ILMN_2684075	AR	-1.02466	0.590008	0.998485	1.00538	0.852683	0.980364	1.01554	0.520237	0.998969	1.00088	0.972411	0.997506	0.448241	0.193867	0.246584	0.492216	-0.331959	0.382801
x6Inv83UOnuHS5Cj1E	ILMN_2914271	ARAF	1.01813	0.662117	0.998485	-1.01444	0.803891	0.975633	-1.07253	0.0236026	0.998969	1.01391	0.560435	0.912549	-0.529132	0.142963	0.00515602	0.988722	-0.365026	0.334073
rXEn1LaO3OXOu_53OI	ILMN_1237241	ARAF	1.01748	0.467039	0.998485	NA	NA	NA	NA	NA	NA	-1.019	0.276821	0.783677	-0.0493652	0.892276	NA	NA	NA	NA
QO89Z9c7HoHl_KVyLo	ILMN_1243107	ARAP3	-1.00419	0.915606	0.998485	1.04074	0.152282	0.868191	1.02385	0.244355	0.998969	-1.01378	0.578433	0.916631	-0.474556	0.165795	0.122503	0.736009	0.364212	0.335235
oyruyspXqhyohXojdA	ILMN_2597827	ARC	-1.12962	0.198808	0.998485	1.39015	0.113346	0.865421	-1.08618	0.542096	0.998969	1.27776	0.118642	0.640099	0.451906	0.222016	-0.0400834	0.912458	0.110077	0.762103
0Hodwf4LeeuPTjHsMo	ILMN_2649846	ARCN1	1.00691	0.798987	0.998485	-1.01787	0.586372	0.939093	1.00139	0.974382	0.998969	-1.01773	0.431909	0.87274	0.190867	0.62278	0.196438	0.586494	-0.0106557	0.976693
oSFRNeiRVTdTu4LJ9c	ILMN_3160792	ARF1	1.04135	0.509132	0.998485	1.04748	0.26336	0.886356	1.00647	0.856702	0.998969	1.00044	0.987635	0.998221	-0.253861	0.479103	-0.351525	0.319221	0.0179651	0.960714
HXVPp6id_V.sPOfLuU	ILMN_1214810	ARF2	1.0484	0.237139	0.998485	-1.0089	0.815852	0.976634	-1.02181	0.527056	0.998969	-1.04842	0.169445	0.70116	-0.318508	0.369748	-0.357039	0.311156	0.442543	0.200288
EL1Iyv_xPkhOLUdeRU	ILMN_1252195	ARF3	1.01035	0.809606	0.998485	1.1761	0.235993	0.883779	1.03971	0.453795	0.998969	1.00691	0.841222	0.982732	0.275174	0.441602	0.213953	0.55282	0.0451488	0.901438
ZaekIcU17EB4L6qI_0	ILMN_2677712	ARF5	1.02614	0.637804	0.998485	1.04321	0.347766	0.898965	1.04469	0.4013	0.998969	1.00867	0.714059	0.955334	0.684782	0.0289047	-0.0327724	0.928387	0.0553859	0.879214
Tjl_4fUkBquqwyQd_s	ILMN_2763103	ARF6	-1.04024	0.244254	0.998485	1.01012	0.802004	0.975102	-1.00254	0.951793	0.998969	1.06304	0.0116757	0.360287	0.387174	0.269006	-0.439871	0.203341	-0.00768	0.983201
QV6EnSA4oCiLAqlqJM	ILMN_2908547	ARFGAP1	1.0026	0.925248	0.998485	1.04483	0.117593	0.865421	1.01522	0.487409	0.998969	1.00976	0.639186	0.935929	-0.09825	0.787141	-0.383437	0.274053	0.215999	0.548936
0eS_IVO7zS6_u4SWVU	ILMN_2908546	ARFGAP1	1.06709	0.256833	0.998485	1.04017	0.470659	0.915435	-1.02062	0.524864	0.998969	-1.02934	0.464561	0.886882	0.0336713	0.926427	-0.0639573	0.860664	0.181813	0.615173
o6tJuHzpN6N5eg53qI	ILMN_2700126	ARFGAP1	1.13721	0.0215999	0.998485	1.02218	0.419222	0.90753	1.00559	0.869431	0.998969	1.00679	0.828473	0.978853	-0.574209	0.0825692	-0.144313	0.690809	0.230485	0.521755
WJ5KdRUeknqUZHu118	ILMN_1241481	ARFGAP2	1.04919	0.180865	0.998485	-1.00085	0.980878	0.997519	-1.0318	0.363976	0.998969	-1.02654	0.324293	0.817675	-0.0705402	0.846459	-0.282792	0.428536	0.480163	0.16015
ZuuGEkIFeLVKeiOWt8	ILMN_2450215	ARFGAP2	1.03528	0.457449	0.998485	-1.03034	0.290223	0.891024	1.01655	0.52044	0.998969	-1.00699	0.752123	0.961586	-0.512475	0.129887	-0.0521629	0.886204	-0.101523	0.780194
97q0SZXe3Ofitd.u10	ILMN_2853409	ARFGAP2	1.07656	0.128995	0.998485	1.01582	0.712402	0.961495	1.03248	0.54551	0.998969	-1.01538	0.566322	0.914342	-0.523499	0.12044	-0.213374	0.553921	-0.27598	0.440212
xx41KdTp0pe64YSQgU	ILMN_2461696	ARFGAP2	1.09933	0.0175774	0.998485	-1.01721	0.546801	0.931317	1.01338	0.662013	0.998969	-1.04321	0.0513054	0.525755	-0.498146	0.142831	-0.0353188	0.922836	0.0204889	0.955199
H0eYXqLASrtnle4igg	ILMN_2648618	ARFGAP3	1.00453	0.851337	0.998485	-1.02229	0.364027	0.899257	-1.00822	0.773471	0.998969	1.02834	0.240526	0.763933	0.140758	0.69812	-0.204892	0.570145	0.231428	0.520006
06jtf5R8fnp_p2..eE	ILMN_2619491	ARFIP2	1.08574	0.0446197	0.998485	1.02196	0.590755	0.939387	-1.04263	0.123232	0.998969	1.00805	0.776206	0.967133	-0.494242	0.146488	-0.268485	0.453226	-0.384572	0.272514
NUVL4HufIFUgh6vckc	ILMN_2955806	ARFIP2	-1.01626	0.811255	0.998485	1.03571	0.316904	0.894812	1.02309	0.418138	0.998969	-1.01098	0.590572	0.922045	-0.153489	0.672043	-0.366033	0.298232	0.13687	0.706144
65uIYJkLOAu15J6lqQ	ILMN_1233495	ARFIP2	1.02388	0.419679	0.998485	NA	NA	NA	-1.01019	0.686654	0.998969	-1.01727	0.468724	0.888147	0.352893	0.317211	NA	NA	0.248199	0.489292
irr9i4JHoa71TXrvpQ	ILMN_2631745	ARFRP1	1.02473	0.522158	0.998485	-1.01132	0.789698	0.973718	1.01872	0.539698	0.998969	1.01954	0.43192	0.87274	0.365093	0.299569	0.0894039	0.805985	0.243478	0.497858
oF94sq930qK.ovunCU	ILMN_1226330	ARFRP1	1.0299	0.160162	0.998485	NA	NA	NA	1.00626	0.802311	0.998969	NA	NA	NA	0.0119168	0.973936	NA	NA	-0.314721	0.375781
oC_q4T4eQmyDAte7kk	ILMN_2947031	ARFRP1	1.02171	0.349764	0.998485	-1.02082	0.294413	0.891024	-1.00327	0.873506	0.998969	1.02159	0.249447	0.768577	0.0173704	0.962014	-0.475248	0.165092	-0.538471	0.108314
NVKv4ehea77yJLtfqM	ILMN_2594128	ARGLU1	1.00192	0.967594	0.998485	1.11259	0.0254546	0.865421	-1.03764	0.331359	0.998969	1.08004	0.0519217	0.527888	0.337471	0.340266	0.630295	0.0688175	-0.0238738	0.947806
TWleil3vFsIT.f5fMU	ILMN_1223713	ARHGAP1	1.05636	0.135781	0.998485	1.04085	0.290939	0.891024	1.02731	0.264454	0.998969	1.00402	0.871315	0.985484	-0.0232241	0.949225	-0.286635	0.422012	-0.331004	0.350182
KSl6tR3n.lRP.s0Lvk	ILMN_2786164	ARHGAP1	-1.00908	0.826809	0.998485	1.03164	0.551524	0.931317	-1.01712	0.647284	0.998969	-1.01342	0.574602	0.915882	-0.11247	0.75706	-0.115335	0.751034	0.0283071	0.938128
xrXtLe6SqGd8e4Ny70	ILMN_2786160	ARHGAP1	1.02247	0.718361	0.998485	1.06396	0.342913	0.898965	-1.01283	0.80869	0.998969	1.03766	0.276626	0.783512	-0.41174	0.237106	0.0540754	0.882055	0.283771	0.426868
9tQBf3XC17pwzfu7ts	ILMN_3133817	ARHGAP12	1.00094	0.97038	0.998485	-1.17922	0.116138	0.865421	1.001	0.956578	0.998969	-1.0379	0.0776427	0.587933	-0.463703	0.177058	0.224894	0.53218	-0.137679	0.704472
9Ac4rd6wBt1dRQNOMU	ILMN_2759756	ARHGAP15	-1.01314	0.73648	0.998485	1.00391	0.945029	0.994451	1.04583	0.107467	0.998969	-1.00667	0.845251	0.984077	0.0287247	0.937216	0.0145984	0.968073	-0.0228647	0.95001
fnSKCHhJYhiceLO9E0	ILMN_2693868	ARHGAP15	-1.01925	0.658667	0.998485	1.01249	0.837424	0.978261	1.01021	0.79503	0.998969	1.01208	0.709874	0.954815	0.198013	0.583434	-0.146515	0.686291	0.212418	0.55574
cp3tl0kg6OQtuX7o_U	ILMN_2715558	ARHGAP17	-1.04638	0.337681	0.998485	-1.00208	0.924245	0.992071	-1.02468	0.391471	0.998969	-1.01129	0.668667	0.942056	-0.132638	0.714906	-0.650849	0.041542	-0.166727	0.645255
lCrIu0eGAjpO7o4lHo	ILMN_1248002	ARHGAP18	1.01542	0.631807	0.998485	1.01487	0.555646	0.931905	-1.01359	0.468744	0.998969	1.00837	0.73211	0.957819	-0.0513817	0.887899	0.239502	0.505121	-0.288638	0.4513
QULU57QMA5RXknBLVE	ILMN_2959729	ARHGAP20	1.01737	0.681184	0.998485	1.06795	0.321228	0.895167	1.04607	0.21728	0.998969	-1.05826	0.0341017	0.477472	-0.266476	0.456743	0.486009	0.154388	-0.171251	0.659545
TpRUAo6RfiJSlFCB.M	ILMN_2672380	ARHGAP22	-1.01359	0.686845	0.998485	-1.0136	0.702851	0.958892	-1.0237	0.438272	0.998969	-1.01774	0.486711	0.895877	-0.476113	0.164215	-0.159898	0.65903	0.0580379	0.873469
oeeVK3tLf2r85Aj_ew	ILMN_1247490	ARHGAP23	1.03672	0.435235	0.998485	-1.07262	0.115886	0.865421	-1.00466	0.890155	0.998969	-1.01139	0.659702	0.939451	-0.351486	0.319279	-0.568622	0.0863025	0.100098	0.783217
ESu6jSuvre7In03rko	ILMN_2728038	ARHGAP24	1.04607	0.0574914	0.998485	-1.16402	0.190499	0.875854	-1.00089	0.973335	0.998969	-1.00768	0.757336	0.962499	-0.691275	0.0268301	0.290243	0.41593	0.357936	0.309854
ZdS56UHip5_iKeB76A	ILMN_3155245	ARHGAP25	-1.0132	0.737249	0.998485	1.03194	0.641652	0.94966	1.06948	0.0723919	0.998969	1.00962	0.68936	0.948341	-0.531031	0.11424	-0.477795	0.162519	0.125108	0.730569
ZpTwg3soZQO_KXopyk	ILMN_1213838	ARHGAP26	1.00254	0.906985	0.998485	1.01573	0.365654	0.899257	1.00813	0.759686	0.998969	1.00356	0.854227	0.984525	0.13277	0.714632	-0.0459129	0.899777	-0.0627614	0.863249
cjBXCpksukRM166wUE	ILMN_3162692	ARHGAP26	NA	NA	NA	NA	NA	NA	NA	NA	NA	-1.01358	0.595053	0.923537	NA	NA	NA	NA	NA	NA
lXu0HlZ9dXbkXQ3Ojc	ILMN_1227758	ARHGAP27	-1.01503	0.425727	0.998485	1.00721	0.794739	0.973867	NA	NA	NA	-1.04781	0.0779727	0.588786	-0.152844	0.694627	0.177766	0.623193	NA	NA
lt4Oo7AKhJERLJfWxs	ILMN_2753687	ARHGAP29	-1.06789	0.147916	0.998485	1.03538	0.332683	0.896238	-1.03099	0.386335	0.998969	1.01179	0.7347	0.958717	-0.603318	0.0648032	0.419066	0.228028	0.533082	0.112586
KioO0dD_ncke3eRKeo	ILMN_2954575	ARHGAP30	-1.00729	0.801445	0.998485	-1.01868	0.397292	0.902716	1.01162	0.548998	0.998969	1.0264	0.168915	0.700998	-0.429061	0.215965	-0.569684	0.0855847	-0.129033	0.722394
WL7X5RNWEZI1OSDiVY	ILMN_1225037	ARHGAP32	-1.01553	0.926433	0.998485	1.03454	0.753148	0.96795	1.02291	0.692851	0.998969	-1.09519	0.0456653	0.509611	-0.486338	0.154067	0.214918	0.550988	0.149345	0.680498
3UVHAlF4QTwoMAOkgM	ILMN_1229159	ARHGAP33	-1.01935	0.682115	0.998485	1.05872	0.125321	0.865421	-1.01568	0.604592	0.998969	-1.00587	0.680665	0.947269	-0.51251	0.129856	-0.144035	0.69138	0.0440109	0.903912
KniQvJFFdf4XZpd4UA	ILMN_2985305	ARHGAP39	1.01238	0.832133	0.998485	1.00256	0.950219	0.994451	1.00038	0.989744	0.998969	-1.02207	0.361473	0.839888	0.614518	0.058699	0.40631	0.243964	0.11067	0.760853
Bpc_fRdJXfcrd_orJA	ILMN_2677876	ARHGAP4	1.01199	0.581798	0.998485	-1.00269	0.880942	0.982513	1.02622	0.13567	0.998969	1.00363	0.842866	0.982945	0.425563	0.220145	0.134773	0.710481	-0.738323	0.0147481
6u4HRW3eIuo3kh2F8Q	ILMN_2702434	ARHGAP44	1.04524	0.436983	0.998485	1.03226	0.200974	0.875854	1.01631	0.675598	0.998969	1.00991	0.736294	0.959275	-0.68987	0.0272702	0.735292	0.0153814	0.202898	0.573985
rSuoVCLHwiL9z1HcrQ	ILMN_3120194	ARHGAP6	1.04571	0.166996	0.998485	NA	NA	NA	NA	NA	NA	NA	NA	NA	-0.513608	0.128896	NA	NA	NA	NA
ZfFU3dIu9XkDiHwBXo	ILMN_2789948	ARHGDIB	1.04579	0.367478	0.998485	1.00841	0.835021	0.977763	1.01765	0.593721	0.998969	1.03758	0.0983503	0.610372	0.0714742	0.844447	-0.504625	0.136885	-0.396583	0.256524
6_0ul0Dt5NEXNtqh5s	ILMN_2950622	ARHGDIG	1.03533	0.700347	0.998485	-1.09899	0.0529659	0.865421	1.0368	0.546862	0.998969	-1.06071	0.178012	0.709598	0.575359	0.0818139	0.0863159	0.812584	0.449295	0.192693
W0qfR1SJFV8NVH.Sls	ILMN_2920752	ARHGEF1	-1.0019	0.96182	0.998485	1.01234	0.620562	0.947092	-1.0347	0.235835	0.998969	1.01006	0.637651	0.93529	-0.501728	0.139524	0.245938	0.493387	0.447319	0.194897
iEk3RFUil6JIqI_ngc	ILMN_2920753	ARHGEF1	-1.0145	0.568189	0.998485	NA	NA	NA	-1.0008	0.967964	0.998969	1.02112	0.322648	0.81695	0.576056	0.0813578	NA	NA	-0.35573	0.31306
WXle7jnomuCkCksgyE	ILMN_3094506	ARHGEF15	-1.00777	0.839678	0.998485	-1.02628	0.516718	0.92471	-1.00687	0.85174	0.998969	-1.01532	0.441476	0.876346	-0.0413534	0.909694	-0.459494	0.181545	-0.513275	0.129187
xXFXjz.RJjJIk16QSo	ILMN_2612125	ARHGEF18	1.07918	0.168819	0.998485	1.04526	0.159492	0.869529	1.00591	0.822222	0.998969	1.00151	0.962562	0.996857	-0.489887	0.150635	-0.120712	0.739757	0.176096	0.626516
lXnH_11CyQLtI1CSn4	ILMN_1212875	ARHGEF19	1.01533	0.614694	0.998485	1.01228	0.632909	0.949555	-1.01193	0.679197	0.998969	-1.00418	0.857933	0.984632	-0.54164	0.105851	-0.0216111	0.952748	-0.542611	0.105103
lThZej_XuHvb1dRYV8	ILMN_2782446	ARHGEF2	1.04214	0.240559	0.998485	1.02532	0.582691	0.938715	-1.0064	0.804141	0.998969	-1.0154	0.479244	0.89346	-0.161301	0.656193	0.306692	0.388734	-0.406303	0.243973
9lIMBULSJO57SL_qEk	ILMN_1242749	ARHGEF25	1.15159	0.0636333	0.998485	1.03928	0.411515	0.906111	1.05868	0.119305	0.998969	1.04753	0.167433	0.698744	-0.107052	0.76849	0.483798	0.156551	0.478451	0.16186
ohEo1tL1HV5ORRhUdA	ILMN_1259949	ARHGEF25	1.0359	0.556498	0.998485	1.03831	0.745687	0.967209	1.04239	0.379913	0.998969	-1.01299	0.677956	0.947077	-0.208469	0.563281	0.150895	0.67733	0.395489	0.257959
3z5bS4qiTtJt57dqno	ILMN_1250057	ARHGEF25	1.04525	0.0814554	0.998485	1.02569	0.216961	0.883043	1.00137	0.938003	0.998969	1.0357	0.106311	0.622341	0.137344	0.705164	0.125814	0.729098	-0.445938	0.196448
3i0K3tJe6giLoaO.64	ILMN_2645208	ARHGEF3	1.02001	0.673043	0.998485	1.07262	0.234097	0.883779	1.00197	0.935002	0.998969	1.0592	0.0262261	0.449453	-0.473281	0.167095	0.266398	0.456879	0.203452	0.572918
BiXEodIJOi0d_Z5N90	ILMN_2760548	ARHGEF4	1.06645	0.271132	0.998485	-1.0749	0.0331681	0.865421	-1.028	0.576764	0.998969	1.055	0.0896139	0.604039	-0.544044	0.104006	-0.504354	0.166181	0.256787	0.473875
ud6MKAfuS6nlTnxEcA	ILMN_2639642	ARHGEF6	1.02382	0.548666	0.998485	-1.01168	0.830805	0.977477	-1.08972	0.0148383	0.998969	1.00712	0.83349	0.980115	-0.344537	0.329599	0.933521	0.000233633	0.29056	0.448154
TdTjniKAfbPeN3gYNU	ILMN_2777804	ARID2	-1.03986	0.354388	0.998485	1.03136	0.603396	0.943171	-1.02766	0.597974	0.998969	1.00733	0.842844	0.982945	-0.241151	0.502104	0.488334	0.152131	0.484971	0.155401
N196sDuJ6nv_8oEqg8	ILMN_2687828	ARID3A	1.04659	0.410425	0.998485	1.06238	0.00642298	0.819637	-1.01878	0.357453	0.998969	-1.01127	0.566247	0.914342	0.510574	0.131561	-0.136949	0.70598	0.00612795	0.986596
lHKn_lQumfVWSsy14I	ILMN_1238558	ARID3B	1.01149	0.61701	0.998485	1.03169	0.184864	0.875854	-1.0495	0.0242449	0.998969	1.01332	0.574258	0.915882	-0.386398	0.270049	-0.0638075	0.860988	-0.237113	0.53902
Z3rl7LMPkRiYiJIiCo	ILMN_3127411	ARID4A	1.0068	0.767207	0.998485	NA	NA	NA	NA	NA	NA	NA	NA	NA	-0.47697	0.16335	NA	NA	NA	NA
QVEEkLdSQqxLdSgCuk	ILMN_3133267	ARID4B	1.04524	0.184343	0.998485	-1.00364	0.88166	0.982699	1.01214	0.55394	0.998969	-1.02427	0.214148	0.738238	-0.434783	0.209228	0.166513	0.645686	-0.234709	0.513935
0nUnvuoIChSWkH.NSc	ILMN_3031781	ARID5B	-1.01905	0.594202	0.998485	NA	NA	NA	-1.02757	0.277972	0.998969	1.01759	0.316615	0.812943	0.408882	0.240703	NA	NA	-0.354783	0.314443
lRL6PR.d0xXStOLgw4	ILMN_2712427	ARIH1	1.01994	0.500942	0.998485	1.02045	0.516321	0.924468	-1.01512	0.438619	0.998969	1.01084	0.621261	0.932256	-0.0270401	0.940893	0.168294	0.642108	-0.3821	0.275871
rum3Te6AX_._RXS6_0	ILMN_2696247	ARIH2	1.14356	0.000779532	0.500429	1.03396	0.157971	0.869529	1.01343	0.623023	0.998969	1.02561	0.379839	0.849057	-0.327724	0.355266	0.0811849	0.823574	-0.28669	0.454497
ujCoxrURzVA6e.jg9E	ILMN_1219577	ARL1	-1.01091	0.782047	0.998485	1.00971	0.783619	0.972986	1.00708	0.775098	0.998969	-1.07186	0.145368	0.675683	-0.664175	0.0362083	0.396929	0.290166	-0.511001	0.131184
3LEh3l.eL1zNeFO_VI	ILMN_1231868	ARL16	1.02368	0.537145	0.998485	-1.00187	0.945846	0.994451	-1.01189	0.775134	0.998969	1.00242	0.912107	0.991054	0.471446	0.168977	-0.051069	0.888577	-0.134427	0.711197
oXnl6TYenX44T9S27c	ILMN_2620304	ARL2	1.00214	0.974478	0.998485	-1.10204	0.299091	0.891024	1.01019	0.810176	0.998969	1.00503	0.849645	0.984525	0.446446	0.195877	-0.342523	0.332621	-0.106125	0.770449
K15jxJ_Pp7qjUWIieU	ILMN_2745036	ARL2BP	1.06087	0.410252	0.998485	-1.04635	0.360089	0.899257	-1.04193	0.277314	0.998969	-1.01123	0.680266	0.947269	0.00900411	0.980305	-0.280789	0.431953	-0.218172	0.544823
BeY8Sfj6e6o1FiInlc	ILMN_2745037	ARL2BP	1.04816	0.471089	0.998485	-1.05994	0.197212	0.875854	1.02462	0.419702	0.998969	1.02207	0.412107	0.864937	0.190584	0.597913	-0.0209497	0.954193	-0.580233	0.0786616
icpa5R1Zua0T0UkjK4	ILMN_2700022	ARL2BP	1.06261	0.069888	0.998485	1.03533	0.235922	0.883779	1.00743	0.780746	0.998969	-1.01758	0.36452	0.840998	-0.144128	0.691188	-0.396621	0.256474	0.00638219	0.98604
im5LRCv8J4OzqE_mpI	ILMN_1238801	ARL3	1.00139	0.98608	0.998485	-1.04826	0.22875	0.883779	1.02316	0.698922	0.998969	1.01713	0.692768	0.949771	0.51893	0.124302	-0.039353	0.914048	-0.131166	0.717961
igCeL7uVudN.nBCShc	ILMN_2786860	ARL3	-1.04502	0.627461	0.998485	1.01326	0.741131	0.96656	-1.00755	0.832338	0.998969	1.02427	0.480191	0.89346	0.27986	0.433543	-0.221787	0.53801	0.0166679	0.963549
ciIRNJQ7V1PoNWHUlY	ILMN_3066763	ARL4A	-1.0262	0.4843	0.998485	1.01034	0.711483	0.961393	-1.03985	0.130611	0.998969	1.02024	0.401351	0.85886	0.579903	0.0788727	-0.517619	0.125424	-0.293833	0.44282
Ku0qNAd6l17O4JLTQ4	ILMN_3144984	ARL4A	1.0021	0.967738	0.998485	1.06748	0.217658	0.88352	-1.02474	0.485292	0.998969	-1.04468	0.267378	0.777817	0.0308938	0.932484	0.488449	0.15202	0.286234	0.422691
WggmsOZyJJjeiQp4mI	ILMN_2997406	ARL4C	1.07821	0.0265245	0.998485	-1.08175	0.00470296	0.819637	1.06374	0.0277776	0.998969	-1.06121	0.00817989	0.325724	0.0881838	0.808591	-0.476692	0.16363	0.045321	0.901064
WuT_quD4gTdRLYoiq0	ILMN_2622354	ARL4D	-1.01326	0.674993	0.998485	1.05103	0.0871825	0.865421	-1.00171	0.949405	0.998969	1.01042	0.712552	0.955244	0.509889	0.132167	-0.298942	0.401438	-0.0987724	0.786031
chKv18fBo.iZ973UBE	ILMN_1221102	ARL5A	1.0781	0.257115	0.998485	-1.00812	0.72672	0.964027	1.04229	0.101238	0.998969	-1.02317	0.489952	0.895877	-0.0730053	0.841149	0.615943	0.057951	-0.145564	0.68824
QrisCEq.Xx8Gj_Jn3s	ILMN_2692989	ARL5A	1.09633	0.190399	0.998485	-1.02556	0.526328	0.927191	1.03109	0.29933	0.998969	-1.05493	0.0299334	0.457255	-0.0965229	0.790812	0.48718	0.153248	0.00544339	0.988093
QrAhKv18fBo.iZ973U	ILMN_2692986	ARL5A	1.05703	0.384752	0.998485	-1.03508	0.33926	0.898965	-1.00574	0.830339	0.998969	-1.05013	0.0453923	0.508641	-0.334036	0.345515	-0.151572	0.675949	-0.375496	0.284948
KRtBKjiOiqLpzv0T3U	ILMN_2988191	ARL5B	-1.03798	0.150737	0.998485	NA	NA	NA	NA	NA	NA	NA	NA	NA	-0.0375131	0.918055	NA	NA	NA	NA
WJbpM.ucuGU0CiCl5I	ILMN_3163134	ARL6	-1.00578	0.89235	0.998485	1.01523	0.595253	0.939387	-1.05434	0.0658823	0.998969	-1.00957	0.710889	0.954815	0.117251	0.747011	-0.186658	0.605616	-0.221085	0.539331
iujU5HjnuCXlXu7N70	ILMN_1253348	ARL6IP1	1.03109	0.382098	0.998485	-1.07512	0.0178156	0.865421	-1.01518	0.742522	0.998969	-1.01944	0.418714	0.86822	-0.216356	0.54826	-0.28536	0.424171	-0.104856	0.773133
oytSuX9cSVJNd_rkug	ILMN_3108440	ARL6IP4	-1.02071	0.674461	0.998485	1.02654	0.602614	0.942659	-1.0327	0.357068	0.998969	-1.01958	0.540239	0.905487	0.0767588	0.833076	-0.599802	0.0668015	-0.106364	0.769944
idige9JdSNUqUQp6SY	ILMN_3034691	ARL6IP4	-1.02169	0.667668	0.998485	-1.01326	0.787573	0.973052	-1.03186	0.4241	0.998969	1.02791	0.266696	0.777817	0.107851	0.766801	-0.674553	0.0323904	-0.0470644	0.897274
Zo5WEibz2ArroVIhKE	ILMN_2760116	ARL6IP4	1.04258	0.537044	0.998485	1.0282	0.527976	0.928094	1.04129	0.356232	0.998969	1.009	0.752345	0.961586	0.592897	0.0708428	-0.0195511	0.957248	-0.030446	0.933461
Nds1KU4BU4QKKLqOVg	ILMN_2740176	ARL6IP4	-1.04816	0.409542	0.998485	1.02921	0.54363	0.931317	1.0134	0.700247	0.998969	-1.06237	0.0404756	0.497026	0.530783	0.114441	0.0365613	0.920129	0.243271	0.498236
3PIaUS5TfNsqCC1eyI	ILMN_1252111	ARL6IP5	-1.11322	0.249117	0.998485	1.01711	0.685406	0.957087	1.05401	0.229921	0.998969	-1.06859	0.0968206	0.608755	-0.0167181	0.963439	-0.607009	0.0627476	0.345423	0.328273
lZaOCCSxUGl9uOutOc	ILMN_1241924	ARL6IP5	-1.13791	0.300683	0.998485	-1.03676	0.374203	0.899257	-1.00526	0.891089	0.998969	-1.02488	0.505375	0.900776	-0.22063	0.540188	-0.579028	0.0794334	-0.198812	0.581885
TvXfX.xL.SdM.Bd7_g	ILMN_2680781	ARL8A	1.04907	0.209937	0.998485	-1.00065	0.99142	0.999223	1.03593	0.557776	0.998969	-1.06916	0.211653	0.73567	-0.615668	0.058095	0.452649	0.188983	0.163512	0.651729
x56Cunl0npYrvjqOBw	ILMN_2845917	ARL8B	-1.00151	0.976734	0.998485	-1.01179	0.746746	0.967209	1.0318	0.441142	0.998969	-1.03761	0.0757992	0.586444	-0.185789	0.607327	-0.100365	0.78265	0.0002529	0.999447
cgB96h6hyrEyP3_714	ILMN_2757916	ARMC10	-1.01645	0.613479	0.998485	1.03333	0.382392	0.899257	1.0098	0.74467	0.998969	1.06973	0.0763708	0.586444	-0.398395	0.254158	-0.109725	0.762845	-0.0514686	0.88771
HeSf6hAqROgeS73t6I	ILMN_2682321	ARMC6	1.02821	0.566604	0.998485	-1.04066	0.249097	0.883779	1.02464	0.344658	0.998969	-1.06661	0.0679047	0.567088	0.374558	0.286251	-0.175824	0.627057	-0.0138855	0.969631
ZJQp49VCNZOOooqK7c	ILMN_2873469	ARMC6	1.03004	0.635951	0.998485	-1.03406	0.354511	0.899208	1.02648	0.510314	0.998969	-1.01901	0.520279	0.902475	-0.486515	0.153895	-0.389483	0.265912	-0.130793	0.718734
3JgiS14Sgui.KgDqpU	ILMN_1234427	ARMC7	-1.01248	0.663167	0.998485	1.03614	0.147515	0.866502	-1.00054	0.982801	0.998969	1.03936	0.117666	0.639557	0.47868	0.161631	-0.679672	0.0306123	0.0702692	0.847043
x74nkiDZyTBYUXT5Tk	ILMN_2735080	ARMC8	1.03162	0.515111	0.998485	1.07376	0.0212036	0.865421	1.02392	0.442316	0.998969	1.00365	0.880285	0.985741	0.0264134	0.942261	0.111005	0.760147	0.145668	0.688028
c5E5EotKODhburioxc	ILMN_2908981	ARMC8	-1.04056	0.438494	0.998485	1.07774	0.181586	0.875854	-1.02069	0.477829	0.998969	1.03894	0.159006	0.689467	0.15379	0.67143	0.210542	0.559317	0.0852939	0.814771
9ScktlHO_Epz_FeNVI	ILMN_1230072	ARMC8	1.0313	0.50659	0.998485	1.00976	0.734703	0.96544	-1.00064	0.980536	0.998969	1.00566	0.830879	0.979387	-0.225753	0.530572	-0.754698	0.011638	-0.196492	0.586388
ixiE6o_yM9xEB4tLaQ	ILMN_2715784	ARMC8	-1.00685	0.735633	0.998485	NA	NA	NA	NA	NA	NA	NA	NA	NA	-0.299219	0.434103	NA	NA	NA	NA
ZqU5S2dNSOHECKkJes	ILMN_2647391	ARMC9	-1.0123	0.577893	0.998485	-1.00439	0.812091	0.976557	1.03504	0.0564654	0.998969	NA	NA	NA	0.320826	0.366078	0.0523342	0.893629	-0.00527769	0.988455
QSKL0iUkee1LRIRNTE	ILMN_2695415	ARMC9	1.00562	0.827564	0.998485	-1.01876	0.391835	0.901856	1.03664	0.0714778	0.998969	1.02374	0.24138	0.763933	0.0299458	0.934552	-0.00229966	0.99497	0.6337	0.0491498
r4TToJ4XoQI4HjUlUk	ILMN_3099741	ARMC9	1.0618	0.0710064	0.998485	-1.00739	0.778583	0.972388	1.02194	0.380223	0.998969	1.02404	0.258714	0.773922	-0.0481916	0.894825	0.470449	0.170005	-0.607086	0.0627054
6D3yv9PmfuyQKjX_J4	ILMN_2645448	ARMCX1	1.04233	0.451109	0.998485	1.02087	0.537361	0.929759	1.03649	0.365528	0.998969	1.02418	0.539445	0.905487	-0.25269	0.481205	-0.132722	0.733558	0.0356194	0.922181
oLVstey17r_H7nn6uo	ILMN_1220398	ARMCX2	1.01829	0.757422	0.998485	-1.01252	0.753095	0.96795	1.01564	0.647224	0.998969	1.04269	0.202854	0.730075	-0.241924	0.500693	0.401831	0.249704	-0.195535	0.588249
0gK.oAaQseipJJ49P4	ILMN_1234742	ARMCX3	-1.01166	0.7702	0.998485	1.00553	0.899918	0.985967	-1.04779	0.0855613	0.998969	-1.02318	0.367756	0.843176	-0.305796	0.390192	0.454031	0.187468	-0.314036	0.376879
r4UgHUIfBIUS4V47iI	ILMN_3001013	ARMCX5	1.0216	0.644965	0.998485	1.01798	0.727879	0.96441	1.02794	0.453452	0.998969	1.01362	0.76615	0.964955	0.31763	0.371142	0.477878	0.162436	0.0355042	0.922432
xVmlHJ6oBwSQtEk0i4	ILMN_1228827	ARMCX6	1.00727	0.737799	0.998485	NA	NA	NA	NA	NA	NA	NA	NA	NA	0.156637	0.66564	NA	NA	NA	NA
3nDVwyQpAPAld.s7pQ	ILMN_2616509	ARNT2	1.01497	0.76473	0.998485	1.04679	0.393971	0.902716	1.06986	0.213113	0.998969	-1.02728	0.407448	0.86114	-0.344382	0.32983	0.20743	0.565272	0.0772945	0.831925
HdTAJRdIlPjELQ3FO4	ILMN_2707510	ARNTL	1.0398	0.353888	0.998485	-1.04284	0.511963	0.921288	-1.01194	0.753228	0.998969	-1.10762	0.000247357	0.095332	-0.649122	0.0422697	0.135625	0.708717	-0.147422	0.684433
HCWNZ1EtdJ_h6TVBDs	ILMN_2699700	ARPC1A	1.05552	0.131207	0.998485	1.08598	0.0635037	0.865421	1.03779	0.297421	0.998969	1.01858	0.587307	0.920055	-0.188974	0.626298	-0.578161	0.079992	-0.12468	0.731464
EJkE7ec6Bv1sE6EIqU	ILMN_2753649	ARPC1A	1.00951	0.870647	0.998485	1.03343	0.398621	0.902716	-1.03674	0.457453	0.998969	1.0002	0.994536	0.998817	0.405607	0.24486	-0.564295	0.089267	-0.0640126	0.860545
QrSUYSRLt7545dAC7k	ILMN_1220452	ARPC1A	1.04298	0.243686	0.998485	1.0243	0.560621	0.932426	1.00964	0.767371	0.998969	1.00607	0.84592	0.98412	-0.376224	0.318307	-0.562204	0.0907231	-0.72038	0.018775
TdUm6ThJWImfUgXoQg	ILMN_1227836	ARPC1B	-1.0218	0.462115	0.998485	-1.00854	0.712	0.961393	1.04072	0.172551	0.998969	1.0221	0.283179	0.790248	0.0272932	0.940341	-0.241301	0.501829	0.200877	0.577887
H3KOSxHnECgikoqgeU	ILMN_2860479	ARPC1B	-1.02584	0.447675	0.998485	-1.00281	0.930603	0.99327	-1.02233	0.462264	0.998969	-1.00094	0.974745	0.997506	0.360322	0.306405	-0.416012	0.231788	0.154478	0.670029
Kl6LSX4KF4A0Die5Ic	ILMN_2860480	ARPC1B	-1.03265	0.21894	0.998485	-1.0221	0.396618	0.902716	-1.01353	0.572611	0.998969	1.02775	0.160742	0.69023	0.429936	0.214927	-0.258835	0.470231	-0.330869	0.35039
xnikIhaHinu4gr.4V0	ILMN_2603725	ARPC3	-1.27229	0.000825449	0.500429	1.11347	0.100941	0.865421	1.00444	0.896097	0.998969	-1.00067	0.981624	0.998221	0.750372	0.0124098	-0.509491	0.13252	-0.334297	0.345114
Tnt8Ql18pcsiKazoV0	ILMN_1249334	ARPC4	1.12227	0.0121221	0.972566	1.05593	0.304962	0.891024	1.02093	0.530655	0.998969	1.04296	0.273689	0.780043	0.0374039	0.92389	-0.390134	0.265044	0.39339	0.260724
6nndSnnSABVXPBECJQ	ILMN_1244135	ARPC5	1.0755	0.181979	0.998485	1.02734	0.498599	0.919326	1.0523	0.281499	0.998969	1.05006	0.0223589	0.435375	-0.279707	0.433806	-0.719401	0.0190144	-0.558273	0.0935005
6Xg7m6WIqDSXn7f1cI	ILMN_2792809	ARPC5	1.04076	0.447612	0.998485	1.06929	0.062072	0.865421	-1.01455	0.643462	0.998969	1.01754	0.476155	0.891861	-0.461712	0.179172	-0.255214	0.476683	-0.138748	0.702264
3eeTQwJ36fPLc9Nmu4	ILMN_2626260	ARPC5L	1.01459	0.648555	0.998485	1.04714	0.158055	0.869529	1.00819	0.765864	0.998969	-1.00343	0.892946	0.987181	-0.53849	0.108299	0.0941801	0.795799	0.0866272	0.811919
fdRT_M5DKEeXsZIqUE	ILMN_2674407	ARPP19	1.04572	0.461635	0.998485	1.12346	0.371252	0.899257	1.07777	0.162704	0.998969	-1.05594	0.139459	0.672627	-0.297527	0.403777	-0.273571	0.444376	0.131776	0.716693
WyevDrkw9bTt5ys5f0	ILMN_1241866	ARPP21	1.09524	0.127874	0.998485	1.26685	0.14877	0.866502	-1.0687	0.0788252	0.998969	1.02612	0.32044	0.815546	-0.31692	0.372271	0.546438	0.127946	-0.130806	0.718707
0tVTvH43SFRF469Le0	ILMN_1240537	ARPP21	1.12819	0.119335	0.998485	1.76609	0.041479	0.865421	1.00143	0.982778	0.998969	1.05271	0.284761	0.792316	-0.699222	0.024433	-0.26716	0.455544	-0.623268	0.0542039
x03W.e9d3fL1Eflogo	ILMN_1229853	ARRB1	1.01679	0.477781	0.998485	1.00726	0.741833	0.96687	1.00538	0.747727	0.998969	1.00838	0.711143	0.954815	-0.141751	0.696075	-0.120496	0.740209	0.113627	0.754626
NuKoyrfJeL54VEyVEE	ILMN_3096335	ARRB1	-1.00022	0.995329	0.999144	-1.02694	0.492222	0.919149	1.00645	0.837733	0.998969	-1.06517	0.0194396	0.416665	-0.246527	0.522525	-0.0226945	0.950381	0.0302003	0.933997
ZeMUhX8k.ocF3XtVTU	ILMN_1233970	ARRB1	NA	NA	NA	NA	NA	NA	NA	NA	NA	-1.01085	0.571045	0.91543	NA	NA	NA	NA	NA	NA
fladaeCoOCjjh7jhS8	ILMN_2700848	ARRB2	1.01605	0.666962	0.998485	-1.04971	0.134212	0.865421	1.02218	0.457757	0.998969	1.01331	0.539019	0.905487	0.214224	0.552305	0.359668	0.307347	-0.275031	0.441851
6SjEhCxNkKIEpB6pJ4	ILMN_2693835	ARRDC2	-1.02718	0.392923	0.998485	-1.04422	0.0333052	0.865421	-1.00822	0.771778	0.998969	-1.03207	0.0799787	0.589207	-0.114161	0.753502	-0.613906	0.0590224	-0.399124	0.28726
H4qUS053LPQjJ9cP.Q	ILMN_2666279	ARRDC3	1.01225	0.814229	0.998485	-1.01872	0.805016	0.975874	-1.00279	0.961995	0.998969	1.08815	0.0154754	0.386493	-0.341567	0.334061	0.303496	0.393949	0.0177032	0.961286
fOvp76f9F3rXu0eJtA	ILMN_2648967	ARRDC4	-1.02949	0.419103	0.998485	1.05867	0.135223	0.865421	1.0327	0.151387	0.998969	-1.00819	0.743179	0.95988	0.437367	0.206226	-0.313823	0.377219	-0.33173	0.349061
lrjAeNPWrIvAoXqhXk	ILMN_1225552	ARSA	1.00496	0.911856	0.998485	-1.04293	0.275946	0.891024	1.01391	0.730495	0.998969	-1.00396	0.914804	0.991203	-0.316246	0.373345	0.30939	0.384357	0.233284	0.516568
QntdL1J7h7KS7_gzyQ	ILMN_1225374	ARSB	1.04568	0.382422	0.998485	1.136	0.0792142	0.865421	-1.03117	0.449932	0.998969	1.02113	0.538299	0.905487	-0.102466	0.778195	0.804537	0.0050068	0.0863634	0.812483
rqNIxAD6AddGpRUp7o	ILMN_3160662	ARSB	1.0066	0.744274	0.998485	NA	NA	NA	NA	NA	NA	NA	NA	NA	0.148634	0.681951	NA	NA	NA	NA
uJCcBQLiv9UpfoV93U	ILMN_2732601	ARSG	1.00874	0.798112	0.998485	-1.10536	0.12113	0.865421	-1.01436	0.553581	0.998969	-1.01109	0.521437	0.902475	-0.526363	0.118058	0.174588	0.653243	-0.111341	0.759438
Q1fg0Yige4VFux_Lko	ILMN_1237725	ARSJ	1.00382	0.873112	0.998485	NA	NA	NA	NA	NA	NA	-1.00086	0.970685	0.997506	0.182622	0.613573	NA	NA	NA	NA
oKByQYX7X0iTASxeSc	ILMN_1223147	ART3	1.03675	0.113737	0.998485	-1.03873	0.121438	0.865421	-1.03596	0.0615055	0.998969	1.02439	0.270308	0.777817	-0.265744	0.458028	-0.496618	0.144255	0.0232212	0.949231
cZzfDfzeAh5zqjVEoI	ILMN_2836607	ART3	-1.01848	0.337447	0.998485	NA	NA	NA	NA	NA	NA	NA	NA	NA	0.240476	0.503338	NA	NA	NA	NA
QR4UEtUL706NEncSEo	ILMN_2941280	ARTN	-1.0316	0.564537	0.998485	NA	NA	NA	NA	NA	NA	-1.0017	0.954375	0.99602	0.132737	0.7147	NA	NA	NA	NA
3VQCN4FFzFCngZ3Skk	ILMN_2836173	ARV1	-1.00945	0.73427	0.998485	1.00112	0.952551	0.994469	-1.00479	0.822126	0.998969	-1.01249	0.542302	0.906226	-0.430894	0.213794	-0.0924524	0.79948	-0.546525	0.102122
xhtzlJfguUghNC2RAs	ILMN_2707198	AS3MT	1.01154	0.709254	0.998485	-1.01726	0.682229	0.957087	-1.02525	0.349855	0.998969	1.03579	0.121425	0.648629	0.00100969	0.997791	-0.334106	0.345407	0.254207	0.478486
oqJ3P0uG3OUl_C5SCE	ILMN_1247626	AS3MT	1.04192	0.246527	0.998485	-1.01029	0.837742	0.978261	1.00888	0.73988	0.998969	-1.01956	0.424905	0.870002	0.170091	0.638505	-0.31098	0.38179	0.0291035	0.93639
KLV2iaZ_SeoI5qlAt8	ILMN_2629591	ASAH1	1.02632	0.441182	0.998485	-1.07589	0.186392	0.875854	1.00985	0.743355	0.998969	1.01784	0.553152	0.910252	0.17952	0.619714	-0.235205	0.51302	-0.0268538	0.9413
ld.9cvPeXlLBVKCLck	ILMN_1231966	ASAH1	-1.0042	0.912148	0.998485	-1.03383	0.446819	0.913041	-1.0086	0.770136	0.998969	1.02591	0.301494	0.800974	-0.369071	0.293931	-0.475838	0.164494	-0.200288	0.579027
uVEulPE0csNruVJXk4	ILMN_2980044	ASAH2	-1.04974	0.188236	0.998485	-1.15861	0.0883305	0.865421	1.00926	0.761183	0.998969	-1.03522	0.131257	0.662723	-0.106504	0.769647	0.025893	0.943397	-0.26966	0.451173
QvyOLq.sTfOmLpRV4g	ILMN_2694153	ASAP1	1.00258	0.966691	0.998485	-1.00636	0.933388	0.993583	1.10752	0.0650366	0.998969	-1.03338	0.125505	0.652253	-0.00217256	0.995248	0.0954688	0.793055	0.00778284	0.982976
3VEZN7NNrfKxeuUnd4	ILMN_3121578	ASAP2	-1.01736	0.489663	0.998485	-1.07518	0.00511662	0.819637	1.05969	0.00467139	0.998969	-1.021	0.34397	0.831169	0.66288	0.051662	0.467833	0.17272	-0.260139	0.467917
olWu_SY5aFI3W7aD24	ILMN_3046047	ASAP2	NA	NA	NA	NA	NA	NA	-1.00263	0.906137	0.998969	-1.01422	0.470718	0.889489	NA	NA	NA	NA	-0.360403	0.306287
HjuiNAoS7_ovr3VCJY	ILMN_3097950	ASB1	1.01506	0.635883	0.998485	-1.01479	0.591364	0.939387	1.01144	0.566281	0.998969	-1.03048	0.171796	0.703819	0.243942	0.497014	0.270223	0.450192	-0.159154	0.660535
KpHot5d.bf7BIN_Xck	ILMN_3104025	ASB13	1.00483	0.918026	0.998485	-1.06141	0.127193	0.865421	1.00665	0.855793	0.998969	-1.02018	0.549532	0.909066	-0.582471	0.077241	0.632499	0.0497148	0.342439	0.332749
WSnmKiGVJULP8.R4kQ	ILMN_2765759	ASB2	1.00096	0.980468	0.998485	-1.00471	0.893401	0.984716	-1.05035	0.128071	0.998969	-1.01125	0.622843	0.932416	-0.418522	0.228695	-0.131686	0.716881	-0.294663	0.408535
3.xIp8dIRu9xr6H55Q	ILMN_2663555	ASB3	1.03656	0.229889	0.998485	1.00697	0.738201	0.966315	-1.01377	0.5825	0.998969	1.0528	0.0187914	0.408792	-0.298948	0.401427	0.00743837	0.983729	-0.506406	0.135277
KvlH1SC3kgc.nc4Ir8	ILMN_1236376	ASB3	-1.04939	0.167881	0.998485	-1.01876	0.405396	0.905432	1.00842	0.727229	0.998969	1.0216	0.366354	0.843033	-0.161134	0.65653	0.431405	0.21319	-0.143701	0.692064
fXl5Jl36N_iSO0OSeE	ILMN_1252320	ASB6	1.05223	0.0844767	0.998485	-1.01976	0.49781	0.919326	1.03002	0.18128	0.998969	-1.00577	0.830325	0.979236	-0.350044	0.321407	0.050253	0.890349	0.211664	0.557176
lU9LClcVPT3ll2rdOM	ILMN_1254737	ASB6	-1.01527	0.566576	0.998485	1.00012	0.996045	0.999326	1.01067	0.703621	0.998969	1.01184	0.632483	0.935148	0.193856	0.59152	-0.0567202	0.876323	0.212422	0.555733
Tp6IcRUDgyhfeGScHQ	ILMN_1225252	ASB8	-1.00236	0.948594	0.998485	-1.00705	0.864179	0.981351	1.02451	0.360668	0.998969	-1.00972	0.699943	0.952578	-0.146719	0.685872	0.308718	0.385445	-0.126108	0.728484
u18V1Fdf3uHedeJ3us	ILMN_1249719	ASCC1	1.06434	0.0988417	0.998485	-1.00203	0.963816	0.994812	1.02094	0.50206	0.998969	1.03175	0.197428	0.729218	-0.0626398	0.872808	-0.127515	0.725552	-0.0140184	0.969341
ToCFUGaCkrEN3ESSOk	ILMN_2859902	ASCC1	1.01268	0.766968	0.998485	1.0174	0.648257	0.951127	1.01925	0.531596	0.998969	-1.03298	0.0832208	0.5933	0.232561	0.517905	-0.470211	0.170252	-0.597979	0.0678536
QtejpKIXsz0gkGApU4	ILMN_1241675	ASCC2	-1.00455	0.861551	0.998485	1.02404	0.284368	0.891024	-1.023	0.127808	0.998969	1.02755	0.0992279	0.612432	-0.876339	0.000878942	0.0841158	0.817293	-0.529286	0.142825
xYJO3xT_S_zxVM13p0	ILMN_1239345	ASF1A	-1.06954	0.224735	0.998485	1.01518	0.705583	0.960023	1.00484	0.857647	0.998969	1.01865	0.458912	0.884316	0.0750726	0.836701	0.545777	0.102688	0.283995	0.426489
c7lR9GGjpZ6Dhht5KI	ILMN_2608703	ASGR1	-1.01639	0.437858	0.998485	NA	NA	NA	NA	NA	NA	1.02821	0.234547	0.758739	0.0743544	0.838246	NA	NA	NA	NA
ceUqKF7x.Xu3u71AiY	ILMN_3154222	ASH2L	1.04112	0.178422	0.998485	-1.01305	0.712078	0.961393	-1.01389	0.599493	0.998969	-1.01506	0.532913	0.904757	0.191217	0.596674	0.036906	0.919378	-0.129716	0.720972
ZUqvKNAg44ol5fGKOU	ILMN_2485900	ASH2L	1.03953	0.130668	0.998485	NA	NA	NA	NA	NA	NA	NA	NA	NA	0.178769	0.645376	NA	NA	NA	NA
0ulr_6ue2FU06IL0HQ	ILMN_2670542	ASL	NA	NA	NA	NA	NA	NA	NA	NA	NA	1.01485	0.37642	0.846672	NA	NA	NA	NA	NA	NA
Kzqulr_6ue2FU06IL0	ILMN_1254257	ASL	-1.00814	0.702813	0.998485	NA	NA	NA	NA	NA	NA	NA	NA	NA	-0.393253	0.260903	NA	NA	NA	NA
HT7AnlHvF0Yr2qJYQI	ILMN_2683374	ASNA1	1.06432	0.280986	0.998485	1.00239	0.927155	0.992789	1.00471	0.929038	0.998969	1.01265	0.67026	0.942462	0.379678	0.313521	0.476046	0.164284	0.101431	0.780388
KljCLigMV8.une8Q64	ILMN_2636755	ASNS	1.02485	0.463738	0.998485	-1.06613	0.12536	0.865421	1.03678	0.437299	0.998969	-1.04303	0.101133	0.619362	-0.474807	0.16554	-0.536225	0.110082	0.0410995	0.910246
KuwCwO.fWneCtiEmEQ	ILMN_2643513	ASNS	-1.03538	0.434884	0.998485	1.00703	0.784793	0.972986	-1.0129	0.711182	0.998969	1.02939	0.253039	0.771132	-0.320604	0.366429	-0.262506	0.463729	0.143016	0.693474
f0r444Djt5JdUgv1fQ	ILMN_3006123	ASNS	1.0399	0.240997	0.998485	1.06635	0.037607	0.865421	1.00099	0.966151	0.998969	1.03482	0.346139	0.831169	0.105288	0.772218	-0.274059	0.475466	-0.246608	0.492172
ikocCgcS3tBX3YH6D8	ILMN_1229211	ASNSD1	-1.01957	0.532292	0.998485	-1.00791	0.709179	0.961393	-1.00832	0.767722	0.998969	1.01045	0.542894	0.906458	-0.455947	0.185377	0.498819	0.142206	-0.110907	0.760353
fhYtEoAkocCgcS3tBU	ILMN_1229430	ASNSD1	NA	NA	NA	NA	NA	NA	NA	NA	NA	-1.00515	0.797371	0.971531	NA	NA	NA	NA	NA	NA
054t11XHFfHtM_EHOo	ILMN_1248518	ASPDH	1.02088	0.493964	0.998485	-1.00103	0.962502	0.994812	-1.01097	0.634737	0.998969	1.00677	0.716538	0.955938	-0.315892	0.373911	0.296453	0.405559	-0.169381	0.639928
0VS3KfYW7T6rn7p4Xw	ILMN_2848071	ASPDH	1.02023	0.310206	0.998485	NA	NA	NA	NA	NA	NA	NA	NA	NA	0.385286	0.271549	NA	NA	NA	NA
KhLUx645_cdF4NIk7g	ILMN_1233759	ASPH	-1.02699	0.345502	0.998485	-1.02038	0.427351	0.911223	-1.00372	0.848242	0.998969	1.02539	0.145728	0.675683	-0.181758	0.615282	0.220221	0.540958	0.21816	0.544847
ERJaK_KH10S4WEuOEg	ILMN_2606990	ASPH	NA	NA	NA	NA	NA	NA	NA	NA	NA	1.00771	0.695316	0.950384	NA	NA	NA	NA	NA	NA
KqSBlCd2H_32dSFfiI	ILMN_1260082	ASPHD1	-1.05553	0.536152	0.998485	1.13024	0.1238	0.865421	-1.00602	0.906778	0.998969	-1.01318	0.592625	0.922697	0.00872934	0.980906	-0.389391	0.266035	0.210584	0.559238
B56h96XHLu1f6e4Uik	ILMN_3162247	ASPHD2	1.02533	0.722151	0.998485	1.10797	0.120079	0.865421	-1.00367	0.929681	0.998969	-1.05439	0.104986	0.622341	-0.412799	0.235781	-0.477598	0.162718	-0.348995	0.32296
i4V7NXot4lDZ4o6pHo	ILMN_2682865	ASPSCR1	-1.00869	0.794568	0.998485	-1.04583	0.0760368	0.865421	-1.00992	0.672434	0.998969	-1.00575	0.81589	0.976726	0.474764	0.165583	-0.37515	0.285429	0.404313	0.246515
l3c3oF6nnIERbdVNxI	ILMN_3156058	ASPSCR1	1.05234	0.138163	0.998485	1.00376	0.91705	0.991589	1.0037	0.892313	0.998969	-1.02949	0.233921	0.757873	0.209458	0.58859	-0.266452	0.456784	0.0516568	0.887302
6QhSBIxCdX361.JkpI	ILMN_1224874	ASRGL1	1.03883	0.152872	0.998485	-1.0176	0.46126	0.913201	-1.00424	0.853786	0.998969	1.00206	0.908563	0.989565	-0.625129	0.0532783	0.639095	0.046664	-0.199473	0.580605
H.sPsn73UUXh6p57tU	ILMN_1247811	ASS1	-1.01607	0.833839	0.998485	1.00403	0.940426	0.994083	1.00806	0.793805	0.998969	1.01014	0.661891	0.939952	0.155724	0.667495	-0.289586	0.417034	-0.00354279	0.99225
TXqBR5I5Qkes4SCQWs	ILMN_2630756	ASTE1	-1.02488	0.347991	0.998485	1.0442	0.169812	0.869821	-1.06685	0.00583195	0.998969	1.00804	0.752012	0.961586	-0.430618	0.21412	0.331657	0.349174	0.280554	0.464633
ZtSeI3c_.Xfg7UYFHs	ILMN_2697205	ASTN1	-1.00053	0.990978	0.998928	1.11097	0.144025	0.865421	-1.00338	0.934646	0.998969	-1.01534	0.613083	0.929414	0.0972838	0.789194	0.240031	0.504152	0.454823	0.186602
E86OgtDmmkon9qaIUI	ILMN_3156714	ASTN2	NA	NA	NA	-1.00077	0.963129	0.994812	NA	NA	NA	-1.00435	0.809721	0.975109	NA	NA	0.468495	0.17203	NA	NA
upE4R_UkKUCQHv3W6E	ILMN_1250707	ASTN2	1.01699	0.403306	0.998485	NA	NA	NA	NA	NA	NA	NA	NA	NA	-0.0666294	0.854893	NA	NA	NA	NA
Zff.0BdSyUh949KRfg	ILMN_2639230	ATAD1	-1.02358	0.674689	0.998485	1.00648	0.802824	0.975421	1.00277	0.939537	0.998969	1.00006	0.99867	0.999603	-0.261234	0.465978	0.165142	0.648443	-0.268125	0.453855
lk1CbSBxZfV3Hi1qX8	ILMN_2826709	ATAD3A	1.02491	0.751548	0.998485	1.00454	0.859609	0.980964	-1.0208	0.639923	0.998969	1.06707	0.0541635	0.529872	-0.440358	0.202783	-0.406953	0.243147	0.302951	0.394841
TqjRX7nFWH3.19MkIk	ILMN_1258929	ATAT1	1.03036	0.416959	0.998485	1.01315	0.712088	0.961393	1.04994	0.0689463	0.998969	1.03598	0.329866	0.822058	-0.0869	0.811335	0.0267341	0.941561	-0.747052	0.0130261
cqUeCFVQEohViqfDPc	ILMN_2629103	ATCAY	1.00019	0.994347	0.999144	1.00781	0.844042	0.979494	-1.03032	0.157272	0.998969	-1.01452	0.575127	0.915882	0.330657	0.350718	-0.686334	0.0283989	0.555272	0.120658
uYvPS7m9d1xqBR6Ugo	ILMN_1230730	ATE1	1.01743	0.730512	0.998485	-1.05977	0.098035	0.865421	-1.03105	0.232391	0.998969	-1.02155	0.533617	0.904857	-0.351072	0.319889	0.213361	0.553945	-0.313363	0.377958
WdUpEldKC_PAF5LkEs	ILMN_2751054	ATF2	1.02101	0.523785	0.998485	1.02633	0.280337	0.891024	1.02384	0.358298	0.998969	-1.00068	0.972324	0.997506	-0.413709	0.234647	0.0331537	0.927556	-0.19936	0.580824
xI7iC07hqg4X1GuhJk	ILMN_3158265	ATF2	1.02306	0.697792	0.998485	-1.02374	0.521579	0.926016	1.02114	0.548531	0.998969	-1.02786	0.491525	0.895877	-0.0709717	0.845529	0.583801	0.0764051	0.241454	0.50155
3VKRJXSgvjwBeS5BL8	ILMN_2751055	ATF2	NA	NA	NA	NA	NA	NA	-1.00527	0.780747	0.998969	-1.00695	0.719127	0.95687	NA	NA	NA	NA	-0.150206	0.678737
T2LwkT12DUkCVRBOFg	ILMN_1223734	ATF4	1.08409	0.144795	0.998485	-1.00541	0.878667	0.982265	1.02324	0.483254	0.998969	1.08658	0.0219968	0.432703	0.27708	0.438317	-0.182406	0.614	-0.119197	0.74293
xlCiNSzeAheMgitbCk	ILMN_2642681	ATF4	1.01158	0.727794	0.998485	1.00132	0.979104	0.997382	1.03766	0.519275	0.998969	1.00034	0.995002	0.998817	0.332648	0.347648	-0.253265	0.480172	0.0641952	0.86015
6oSgquPsvrByq0.yd4	ILMN_2646985	ATF5	1.06702	0.254004	0.998485	-1.07104	0.0818276	0.865421	1.01682	0.720751	0.998969	1.06299	0.0715729	0.579917	0.0799812	0.826156	-0.153521	0.693328	-0.104528	0.773826
T_otCuocrVSuoQqOvs	ILMN_2667889	ATF6B	1.01701	0.750497	0.998485	1.05007	0.204483	0.877834	-1.01312	0.759395	0.998969	1.0049	0.871329	0.985484	-0.163374	0.652006	-0.152085	0.674902	0.495741	0.145077
EUX7kI3VoTuHsxHG.s	ILMN_2722213	ATF7IP	1.06035	0.201896	0.998485	1.12026	0.0351195	0.865421	1.02497	0.355652	0.998969	-1.03459	0.240984	0.763933	-0.278608	0.43569	0.517557	0.125477	0.0992714	0.784971
EOLNO3zHfsvFC5a9.E	ILMN_1222865	ATG10	-1.02991	0.219933	0.998485	-1.03171	0.167958	0.869529	1.00186	0.934035	0.998969	-1.01	0.653105	0.938141	0.595776	0.069139	-0.0601207	0.86896	-0.351804	0.318811
BSpuRK2._XKRL3Xnug	ILMN_2667100	ATG10	-1.034	0.213594	0.998485	1.02818	0.409537	0.905432	1.00148	0.952681	0.998969	-1.01448	0.614817	0.929414	0.0486274	0.893879	0.286816	0.421706	-0.313715	0.377393
QRIke6EunzkSxJfKAE	ILMN_2663570	ATG12	1.06296	0.325152	0.998485	-1.01572	0.611107	0.94453	-1.01228	0.604016	0.998969	-1.00281	0.922385	0.991652	-0.645967	0.0436208	0.0526901	0.88506	0.15255	0.673955
3kqdJS6X_SEkl.O1yM	ILMN_2632230	ATG13	-1.004	0.910615	0.998485	1.00199	0.956536	0.994812	1.03094	0.271536	0.998969	-1.05133	0.0406333	0.497026	0.0356053	0.922212	0.0282335	0.942521	0.0801461	0.837599
9W5E63iZRv7e0R8f5E	ILMN_2620574	ATG16L1	1.05437	0.253243	0.998485	1.09244	0.144614	0.865421	1.00032	0.992278	0.999288	-1.00738	0.818988	0.977542	-0.109384	0.763564	0.189721	0.599604	0.653574	0.0404107
37goxeVJefvlB6WIi4	ILMN_1213779	ATG2A	-1.01708	0.561619	0.998485	-1.0128	0.687184	0.957087	-1.02595	0.366744	0.998969	-1.04477	0.0541646	0.529872	0.18653	0.605868	0.304607	0.392132	0.326493	0.357183
3bt0aorqoyOU7q2uz8	ILMN_2963432	ATG2A	-1.00838	0.824294	0.998485	-1.02492	0.473911	0.915974	-1.0188	0.552882	0.998969	-1.00554	0.803057	0.973606	-0.013743	0.969943	-0.417655	0.22976	0.571969	0.0840528
QvCh8uSVvLtCpPoLqc	ILMN_2652518	ATG2B	1.06426	0.102847	0.998485	1.00606	0.832633	0.97772	-1.00855	0.746914	0.998969	-1.00123	0.968427	0.997506	-0.098441	0.786735	0.214878	0.551064	0.323537	0.361809
6YXsTR8YQM8UhFGnOs	ILMN_2651781	ATG3	1.03088	0.508402	0.998485	-1.02224	0.669277	0.955862	1.02107	0.70594	0.998969	1.01265	0.719362	0.95687	0.129967	0.720452	-0.11791	0.745627	-0.0468339	0.897775
ZquhM6BHEF4qB3Sp_I	ILMN_1240472	ATG4B	-1.01026	0.710849	0.998485	-1.01419	0.640765	0.94966	-1.04658	0.0449656	0.998969	-1.02917	0.0953597	0.608163	0.0117774	0.97424	0.0328375	0.928245	0.386049	0.270519
Qe0oereqvgVKl_zOMo	ILMN_2914796	ATG4C	1.00327	0.885195	0.998485	-1.00095	0.964957	0.995159	1.00722	0.746253	0.998969	1.03123	0.154598	0.686633	0.239438	0.505239	-0.547347	0.101503	0.653458	0.0404585
loC.nkd3Y6efoh1574	ILMN_2998135	ATG5	1.00458	0.934101	0.998485	-1.04301	0.459188	0.913064	-1.02365	0.425875	0.998969	-1.02816	0.333598	0.825663	0.386462	0.269963	-0.215647	0.577358	-0.130857	0.737196
WJ_e1E_DtBU3iznAI4	ILMN_2998139	ATG5	1.02194	0.386454	0.998485	-1.04585	0.466614	0.914237	1.01231	0.69446	0.998969	1.07126	0.0186385	0.407005	-0.0299633	0.934514	-0.293222	0.410939	0.243153	0.49845
olTkaenySt0oKiHIig	ILMN_1246724	ATG7	-1.02859	0.423696	0.998485	-1.01671	0.531799	0.928637	1.01031	0.679263	0.998969	-1.05915	0.0383277	0.490215	0.274802	0.442247	0.262386	0.46394	0.0472293	0.896916
ulUd_gnih5F70dCZAE	ILMN_3160369	ATG9B	-1.01747	0.641971	0.998485	-1.06516	0.359073	0.899257	-1.02221	0.338069	0.998969	1.01323	0.506144	0.900776	-0.4622	0.178653	-0.460313	0.180666	0.244243	0.496467
ZtIemFIqDotI6Eq9Sk	ILMN_2910684	ATHL1	1.01334	0.535269	0.998485	NA	NA	NA	-1.00324	0.886942	0.998969	NA	NA	NA	0.270645	0.449457	NA	NA	0.233394	0.516364
0rgiJIjdQ5j40s7haQ	ILMN_2606567	ATIC	1.01379	0.584965	0.998485	-1.03384	0.117969	0.865421	-1.01195	0.574879	0.998969	NA	NA	NA	-0.255923	0.475418	0.361739	0.304365	-0.114513	0.752762
fq4IiSI3UOY_NLO4Wk	ILMN_2606564	ATIC	-1.00704	0.854915	0.998485	1.01899	0.451834	0.913041	-1.00829	0.698587	0.998969	NA	NA	NA	-0.1376	0.704634	0.643418	0.0447338	-0.431597	0.212964
oVeoHq18HI3A56h538	ILMN_3070951	ATIC	1.0121	0.847911	0.998485	1.00814	0.828462	0.977477	1.00242	0.940844	0.998969	1.02379	0.385718	0.851494	0.347414	0.325305	0.402883	0.248349	0.301613	0.397037
lvTngIq6tKuRYvInQo	ILMN_3138157	ATL2	-1.02718	0.400808	0.998485	1.04925	0.0700423	0.865421	-1.03278	0.227248	0.998969	-1.00282	0.923174	0.991652	0.300243	0.39929	-0.481214	0.159104	0.311612	0.380771
3kokTGo3wTLbrt7pKI	ILMN_3060766	ATL2	NA	NA	NA	-1.02938	0.363251	0.899257	1.01629	0.452171	0.998969	1.03464	0.0910611	0.604039	NA	NA	0.157006	0.664891	-0.582526	0.0772065
KU1ADvlxJzi8Iu3Em4	ILMN_1233905	ATL2	-1.0196	0.574713	0.998485	-1.00931	0.866802	0.981351	1.01283	0.847182	0.998969	-1.00096	0.963642	0.997376	0.422891	0.256776	0.35709	0.311081	0.0453413	0.90102
lnt85BdtOqckeG1f7E	ILMN_2661107	ATL2	1.07667	0.112796	0.998485	1.01297	0.714866	0.961735	1.00295	0.909206	0.998969	1.01856	0.555803	0.910454	-0.429095	0.215925	0.0612645	0.866486	0.554937	0.0958999
olDlNGrUPUig6SN4hQ	ILMN_2635606	ATL3	-1.01801	0.37841	0.998485	-1.00813	0.655007	0.953578	-1.01328	0.508981	0.998969	1.00019	0.992197	0.998817	-0.0593249	0.870683	0.52212	0.149328	0.0506693	0.896998
EpfEWKKekv_2E_f3z8	ILMN_2936468	ATL3	-1.00776	0.664578	0.998485	NA	NA	NA	NA	NA	NA	1.01432	0.400566	0.85842	-0.0214122	0.956396	NA	NA	NA	NA
3dCNT2yjG54d8rTn7k	ILMN_1258206	ATM	-1.04747	0.18856	0.998485	NA	NA	NA	NA	NA	NA	-1.00693	0.654497	0.938256	0.610843	0.0606581	NA	NA	NA	NA
EuF9FfAdgfSA4TdFRQ	ILMN_2783896	ATM	-1.02854	0.251821	0.998485	NA	NA	NA	NA	NA	NA	NA	NA	NA	0.0257035	0.943811	NA	NA	NA	NA
uWngoguTt526d.sDMI	ILMN_2701824	ATMIN	-1.00865	0.883687	0.998485	-1.11802	0.0450735	0.865421	1.04859	0.28401	0.998969	-1.0515	0.0644147	0.559193	-0.492447	0.148189	-0.0660358	0.856175	0.236248	0.511098
KodtR5fBnQk3Pwldac	ILMN_3146362	ATMIN	1.03517	0.34816	0.998485	-1.09297	0.0482346	0.865421	1.02128	0.580551	0.998969	-1.07722	0.00159499	0.188296	-0.338783	0.372485	0.0563296	0.877169	0.282362	0.429268
x5YNfrpR5V1XBU_u48	ILMN_1255644	ATN1	-1.00449	0.950913	0.998485	-1.01359	0.698474	0.957796	-1.00822	0.825025	0.998969	-1.05532	0.0388561	0.494095	0.309834	0.383639	0.322463	0.397377	0.50896	0.132993
KpfVZ6dXkJ9TsMC0J4	ILMN_1232762	ATOX1	-1.15097	0.280116	0.998485	1.00371	0.948444	0.994451	1.03631	0.546713	0.998969	-1.0129	0.636404	0.935148	0.184519	0.609828	-0.460795	0.180151	0.167073	0.64456
ZSoQtGpx8yzRdYKlEk	ILMN_2725188	ATP10A	-1.01556	0.604347	0.998485	1.01387	0.64109	0.94966	-1.01903	0.38672	0.998969	1.04766	0.0378701	0.489784	0.587153	0.0743232	0.410495	0.238669	-0.173941	0.630809
Bege0QBTu3AYJ5fefU	ILMN_1235196	ATP10D	-1.00319	0.883591	0.998485	NA	NA	NA	-1.02242	0.173971	0.998969	1.01504	0.377043	0.846901	-0.54077	0.106523	NA	NA	0.330238	0.385424
9Qov4liXrQSR7sTTpQ	ILMN_1250382	ATP13A1	1.03455	0.323872	0.998485	1.05174	0.182022	0.875854	1.05888	0.11359	0.998969	-1.01345	0.606022	0.928639	-0.281853	0.430136	0.150147	0.678859	-0.372516	0.289097
9nLIItenJF.rAwNpt4	ILMN_2942669	ATP13A1	-1.00304	0.957101	0.998485	-1.00551	0.889387	0.984284	-1.01433	0.6778	0.998969	-1.01195	0.666679	0.941647	-0.208913	0.562432	-0.441851	0.201076	-0.113561	0.754764
9_nW4rLkpfoqTnoR6M	ILMN_1254562	ATP13A2	-1.03161	0.375907	0.998485	-1.07524	0.0696659	0.865421	1.00717	0.784634	0.998969	-1.01714	0.53055	0.904072	0.287774	0.452717	0.740422	0.0143204	0.612777	0.0596223
N7XEkFa7_IkOKJB.go	ILMN_2721169	ATP13A4	1.04714	0.101612	0.998485	-1.09073	0.188525	0.875854	1.0063	0.758479	0.998969	-1.00534	0.818868	0.977542	-0.395018	0.258577	0.447572	0.194615	0.66565	0.035648
NRbsaoYSakK.Mbl._8	ILMN_1218058	ATP1A1	1.06125	0.171482	0.998485	1.07752	0.550092	0.931317	1.01896	0.564854	0.998969	-1.05211	0.141879	0.675683	0.296635	0.405257	0.0204434	0.955299	0.158678	0.661499
fN9NzjgvaCdNcaaxXo	ILMN_2722716	ATP1A2	1.16694	0.0134761	0.972566	-1.14465	0.0305191	0.865421	1.05715	0.328241	0.998969	1.03248	0.441102	0.876299	-0.390599	0.264424	0.475015	0.165328	0.0451998	0.901327
EuOr7vudbng57dlN3U	ILMN_2767615	ATP1B1	1.04094	0.362231	0.998485	1.04084	0.251012	0.883779	-1.09869	0.0100589	0.998969	-1.01667	0.522169	0.902475	-0.297391	0.404003	-0.10184	0.794317	0.104487	0.773914
omAiVXnUL.bU0iSTPU	ILMN_2602902	ATP1B2	1.00973	0.92732	0.998485	-1.16548	0.115506	0.865421	-1.03518	0.452521	0.998969	1.01747	0.525074	0.902691	0.311584	0.380817	0.568663	0.0862748	0.52527	0.118964
oqeH_LvoNC31E9qzfI	ILMN_1240702	ATP1B3	1.01524	0.772059	0.998485	-1.11097	0.182697	0.875854	-1.01703	0.688637	0.998969	1.05321	0.245411	0.765626	-0.646537	0.0433746	0.0244257	0.946601	0.11359	0.754704
BpdS1wfS_.K7klJ71E	ILMN_1245425	ATP2A2	1.02699	0.607718	0.998485	1.01531	0.776757	0.972372	-1.01224	0.726121	0.998969	-1.0432	0.207055	0.73402	-0.26667	0.456402	0.113606	0.75467	0.0199727	0.956327
xmTv4ey3sDIrS.e56w	ILMN_1239742	ATP2A2	1.01047	0.829806	0.998485	-1.00263	0.965773	0.995363	-1.0041	0.925349	0.998969	-1.05102	0.115648	0.636897	-0.562589	0.0904537	0.384663	0.272391	0.0910243	0.802526
xee_Vf4QCcnB7RKAaI	ILMN_2900462	ATP2A3	-1.0184	0.443749	0.998485	-1.00727	0.79332	0.973843	-1.03382	0.0838478	0.998969	-1.02572	0.182976	0.71364	-0.0126173	0.972404	0.248452	0.488836	0.300492	0.398881
KfpKJIme5Ufnj7946I	ILMN_2688236	ATP2A3	1.00306	0.958236	0.998485	-1.0536	0.350007	0.898965	-1.04369	0.102509	0.998969	-1.02272	0.342989	0.830972	-0.582679	0.0771103	-0.198105	0.583256	-0.410841	0.238234
l6oXx3qlJ8.QU9QUlk	ILMN_2878021	ATP2B1	1.11717	0.280317	0.998485	1.11983	0.272133	0.890408	1.06781	0.165279	0.998969	1.01964	0.499324	0.899227	-0.485005	0.155367	-0.0850258	0.815345	-0.0303007	0.933778
uwOKO6CIyFGSJqJ9ls	ILMN_2688213	ATP2B2	-1.00657	0.948629	0.998485	-1.00921	0.856558	0.980519	1.06028	0.0767505	0.998969	-1.0488	0.0882597	0.599853	0.411667	0.237198	0.602451	0.0652922	-0.217329	0.546418
uiUr3SEokigHJCil4Q	ILMN_3113303	ATP2B2	1.0162	0.755109	0.998485	1.09979	0.334238	0.896238	1.03934	0.425661	0.998969	-1.09843	0.00793163	0.323784	0.1026	0.777911	-0.298071	0.402877	-0.0137382	0.969953
ugggPhTngYidZKpSNc	ILMN_1243177	ATP2B3	-1.03293	0.157704	0.998485	NA	NA	NA	NA	NA	NA	1.02813	0.126526	0.655155	-0.214302	0.552156	NA	NA	NA	NA
ZdQvXkv0vhLQbrJ7jY	ILMN_2677687	ATP2B3	1.02582	0.308089	0.998485	NA	NA	NA	NA	NA	NA	-1.01169	0.541587	0.906226	-0.421826	0.224659	NA	NA	NA	NA
T_v3CmqGLude_jrgnk	ILMN_1217742	ATP2B4	-1.00532	0.78991	0.998485	1.05031	0.0213791	0.865421	-1.00738	0.687137	0.998969	-1.00745	0.746075	0.961379	0.359467	0.307639	-0.608016	0.0621944	0.423432	0.222712
rVdJSecOiN_bQgsE2U	ILMN_1252963	ATP2C1	1.03571	0.259269	0.998485	1.02461	0.230456	0.883779	-1.00971	0.587095	0.998969	-1.00666	0.724053	0.957615	-0.739535	0.0145	-0.0334055	0.927007	-0.225988	0.530134
uT4yiL3vv7t7HHgkYk	ILMN_2658392	ATP2C1	-1.01008	0.74994	0.998485	-1.02283	0.641715	0.94966	-1.02415	0.654441	0.998969	-1.02577	0.483874	0.895615	0.216984	0.574942	0.277058	0.438355	-0.244991	0.495107
WkU.sCrx37PXjsSA0Q	ILMN_2633229	ATP5A1	1.02615	0.700576	0.998485	1.01361	0.898276	0.985462	-1.04749	0.787423	0.998969	1.03344	0.512384	0.900776	-0.415224	0.232764	0.315118	0.375147	-0.0736142	0.839839
Nq24qHUlApJHkHjd1M	ILMN_2598972	ATP5B	1.00149	0.97252	0.998485	-1.00252	0.931796	0.993445	-1.03214	0.177718	0.998969	-1.01258	0.656515	0.939232	-0.644932	0.0440706	0.160637	0.657535	0.11476	0.752243
Z4X4f0FkVlKe00QKL4	ILMN_1249783	ATP5C1	1.03646	0.474953	0.998485	-1.02855	0.622126	0.94739	1.00045	0.989987	0.998969	1.00364	0.887127	0.986418	-0.149376	0.680433	-0.230756	0.521253	-0.13272	0.714736
6p4jUjWz4pQ4JXLgpU	ILMN_1254705	ATP5D	-1.16412	0.0841944	0.998485	1.0292	0.495853	0.919326	1.02831	0.408306	0.998969	-1.02028	0.469958	0.888647	0.555826	0.0952564	-0.443968	0.19867	0.0322586	0.929508
QYGeIIfakkkwA_4C3Y	ILMN_2604794	ATP5E	-1.08302	0.226583	0.998485	-1.05042	0.223129	0.883779	-1.02446	0.745898	0.998969	1.04054	0.0724101	0.579917	0.175815	0.627074	-0.310505	0.382556	0.102475	0.778176
uu3ggZpZXK1KrPEpBA	ILMN_2790486	ATP5F1	-1.02321	0.69767	0.998485	1.02367	0.768328	0.970456	1.03095	0.464349	0.998969	1.09365	0.00451676	0.268381	0.317644	0.37112	-0.537096	0.109395	-0.21411	0.552521
lS_u6ejSiek_kS7_sk	ILMN_1230991	ATP5G1	-1.08596	0.429086	0.998485	1.00385	0.925104	0.99229	1.01462	0.587243	0.998969	1.04803	0.0851025	0.595022	0.418281	0.228991	-0.26663	0.456473	0.154967	0.669033
ZeneqSo_oe._ot00_k	ILMN_2691528	ATP5G2	-1.15003	0.206229	0.998485	-1.00208	0.96126	0.994812	-1.01566	0.75569	0.998969	1.07287	0.117348	0.639109	0.419594	0.227381	-0.464104	0.176634	0.274654	0.442501
9X7eCc6t3.v46_b340	ILMN_2692124	ATP5G3	-1.0828	0.13113	0.998485	1.04262	0.239882	0.883779	-1.01862	0.365341	0.998969	1.02401	0.286125	0.794002	0.156246	0.666434	0.335557	0.343186	0.0702408	0.847104
Wo1SdKNSiziCSeiAOI	ILMN_3004441	ATP5H	-1.17362	0.0508238	0.998485	-1.01388	0.738222	0.966315	-1.00433	0.949486	0.998969	-1.06607	0.13763	0.669833	0.125744	0.729244	-0.362026	0.303954	-0.194237	0.590777
9HRSdaD21bpXJWZ9RI	ILMN_2611261	ATP5J	-1.08009	0.283351	0.998485	-1.02494	0.577321	0.936521	1.02566	0.327214	0.998969	-1.02421	0.524769	0.902691	0.575888	0.0814678	-0.638115	0.0471089	0.22661	0.528972
xh3pJ2odLkLEiHSU68	ILMN_2962632	ATP5J	-1.17502	0.0919934	0.998485	-1.03729	0.455015	0.913041	1.02148	0.463613	0.998969	1.05889	0.0138651	0.379903	0.48867	0.151807	-0.547653	0.101274	-0.229229	0.524091
TEiHSU695Io30p3Xe0	ILMN_2876629	ATP5J	-1.14677	0.204493	0.998485	-1.01544	0.835617	0.977763	1.00598	0.854054	0.998969	1.05796	0.0795542	0.589123	0.524496	0.119608	-0.174093	0.630505	-0.19048	0.598117
KG9oCkk3ao8k616SXE	ILMN_1213914	ATP5J2	-1.16521	0.0774262	0.998485	1.03493	0.413473	0.906111	1.01348	0.634568	0.998969	1.05133	0.0790051	0.588887	0.261464	0.46557	-0.237249	0.509257	-0.249287	0.487327
laGbq9Jaa9qiGxfUXw	ILMN_2973897	ATP5L	-1.17787	0.159894	0.998485	-1.00468	0.931408	0.993445	-1.0136	0.753796	0.998969	1.01962	0.537421	0.905487	0.49941	0.141658	-0.717729	0.0194282	-0.152405	0.67425
QfeP4vfP4O9_hTuwSg	ILMN_2587859	ATP5L	-1.16861	0.169873	0.998485	-1.01784	0.82444	0.977477	-1.01351	0.930711	0.998969	1.0577	0.0824707	0.5933	0.115509	0.750669	-0.0770688	0.83241	0.0880266	0.808927
omUst3.T_r_FxJZWoA	ILMN_2917540	ATP5O	1.01159	0.891717	0.998485	-1.05847	0.385169	0.899257	1.02427	0.406469	0.998969	1.00271	0.936311	0.993628	0.544104	0.10396	-0.167297	0.64411	-0.0360465	0.921251
HdHnoNR7Fie26T4ieY	ILMN_2642158	ATP5S	1.00766	0.82954	0.998485	1.01647	0.721776	0.962562	-1.02255	0.450741	0.998969	1.01827	0.352038	0.833934	0.035616	0.922189	0.00541701	0.988151	-0.110186	0.761873
xpGFloiDUCwIhe5qh8	ILMN_2666225	ATP5SL	1.00441	0.932638	0.998485	-1.07702	0.221135	0.88352	1.02991	0.326831	0.998969	-1.02758	0.258533	0.773583	0.30568	0.390381	0.599811	0.0667965	0.115016	0.751704
NtCKWiu7uqr53vv19c	ILMN_2607547	ATP6AP1	1.03044	0.47524	0.998485	1.0108	0.727637	0.964221	1.03336	0.333742	0.998969	-1.03071	0.382705	0.849242	-0.333525	0.346298	-0.122147	0.736755	-0.37976	0.27907
HOgPpcxSiNg1SGyeR4	ILMN_2628657	ATP6AP2	1.09823	0.333111	0.998485	-1.00819	0.887219	0.983481	-1.05956	0.150316	0.998969	1.02186	0.691706	0.949302	-0.300449	0.398952	-0.210362	0.559662	-0.186607	0.605717
NVe4Lx36.u7rOn0N7I	ILMN_2939424	ATP6AP2	1.04602	0.455078	0.998485	1.03431	0.342927	0.898965	-1.03144	0.299066	0.998969	-1.03981	0.322073	0.816638	-0.61574	0.0580571	0.624593	0.0535437	0.0347404	0.924097
ZXz.aKARey.5L6dUmI	ILMN_2725286	ATP6AP2	1.10452	0.253841	0.998485	1.00731	0.894262	0.984767	1.02337	0.471326	0.998969	1.03031	0.417471	0.866725	-0.28372	0.426955	-0.178783	0.621175	-0.0156968	0.965672
96A_lzFKI2DVIbJ5Hs	ILMN_2628658	ATP6AP2	1.14717	0.180998	0.998485	1.05651	0.455221	0.913041	1.02471	0.58659	0.998969	1.08176	0.0575093	0.542029	-0.268187	0.453747	-0.254309	0.478303	-0.122291	0.736453
964X7_BV3tf_5WvG40	ILMN_1247682	ATP6V0A1	1.08147	0.341984	0.998485	1.00895	0.834976	0.977763	-1.03927	0.180851	0.998969	-1.09349	0.0157837	0.387024	-0.0954474	0.793101	0.333828	0.345835	0.326156	0.357709
lR6h6fQvXVfdf4kT2o	ILMN_1256334	ATP6V0A1	1.13152	0.0218507	0.998485	1.05132	0.209513	0.880091	-1.03028	0.372283	0.998969	1.00231	0.93429	0.993628	-0.101488	0.795016	0.442222	0.200653	0.352109	0.318362
TWtIHxSqAvUV2_Pl8Y	ILMN_2747311	ATP6V0A2	1.01464	0.83692	0.998485	1.05125	0.0740698	0.865421	-1.00539	0.828817	0.998969	1.00603	0.750275	0.961586	-0.656239	0.0393251	0.115265	0.751181	-0.0404695	0.911618
6VV0FVNSVN9cu.uAwE	ILMN_1243149	ATP6V0B	-1.05412	0.536635	0.998485	1.0272	0.509989	0.920856	1.03813	0.158096	0.998969	1.02599	0.313554	0.809179	-0.0876556	0.80972	-0.73277	0.0159226	-0.154883	0.669205
NIOByL7T.3fR6O.PzA	ILMN_1239946	ATP6V0C	-1.04119	0.354835	0.998485	1.00856	0.73683	0.966291	-1.00242	0.947938	0.998969	1.00049	0.982439	0.998221	0.467449	0.173121	-0.00010218	0.999776	-0.0908309	0.802939
iXqEu1MrTVSBe6giyI	ILMN_2685365	ATP6V0D1	-1.02411	0.75778	0.998485	-1.02454	0.479175	0.915989	-1.05692	0.0149835	0.998969	1.00348	0.896496	0.987968	-0.143485	0.692509	-0.330742	0.350586	-0.222846	0.564391
ulSZTZlCNhBxNVN.yQ	ILMN_2928320	ATP6V0D1	1.04048	0.363788	0.998485	1.00067	0.987129	0.998244	1.03936	0.331446	0.998969	-1.00243	0.942624	0.994016	0.482089	0.158236	0.0538462	0.882552	0.143741	0.712167
Z_JI6Ke4E2RIReSJ3E	ILMN_1258534	ATP6V0D1	1.07495	0.275235	0.998485	1.0229	0.520619	0.926016	1.03737	0.384135	0.998969	-1.00373	0.913455	0.991054	0.0753208	0.836167	-0.535336	0.110787	-0.0865448	0.812095
0pB9elDgm0XeGu0tNg	ILMN_2608429	ATP6V0D1	1.09167	0.185834	0.998485	-1.06799	0.346962	0.898965	1.02139	0.620381	0.998969	1.07258	0.0882996	0.599853	0.109309	0.763723	-0.496472	0.144392	-0.204676	0.57056
KkTSF9dTJUfam8Xl8Q	ILMN_2650911	ATP6V0E	-1.14158	0.0332088	0.998485	-1.02913	0.675949	0.957087	-1.07491	0.0390661	0.998969	1.0581	0.0910079	0.604039	0.536039	0.11023	-0.438559	0.20485	-0.233138	0.516838
EiKuLKk9_Xu_UqfnKE	ILMN_2832658	ATP6V0E2	1.01666	0.705627	0.998485	1.01673	0.711166	0.961393	-1.01908	0.576536	0.998969	-1.06046	0.0700599	0.573843	0.412324	0.236375	-0.0223073	0.951227	-0.245274	0.494593
uShT.7qkfqBz_.9ASE	ILMN_1255570	ATP6V1A	-1.04372	0.556967	0.998485	-1.01666	0.905115	0.987287	1.02357	0.830957	0.998969	-1.04844	0.232863	0.756915	-0.716895	0.019637	0.303644	0.393706	-0.119371	0.742566
ZKp.6IOgmmKqKjPCSk	ILMN_2879910	ATP6V1B1	1.00174	0.931946	0.998485	1.00405	0.850248	0.980362	1.01875	0.34299	0.998969	NA	NA	NA	-0.0512471	0.888191	-0.329958	0.351798	0.102271	0.778607
EerjfukTskO.f09e1c	ILMN_2680440	ATP6V1B2	1.09573	0.0727958	0.998485	-1.00333	0.918736	0.991608	-1.01415	0.666422	0.998969	-1.03178	0.32948	0.822058	-0.484084	0.156271	0.173444	0.631801	-0.239989	0.504229
QX1XI4P3TutTN0E.n8	ILMN_1217272	ATP6V1C1	1.01489	0.711087	0.998485	1.00063	0.989277	0.998798	1.05976	0.231364	0.998969	-1.00853	0.773754	0.966652	-0.117366	0.746769	-0.789755	0.00657483	0.207036	0.566027
cnXElUwAtJRQGXiIrk	ILMN_2898578	ATP6V1C2	1.00057	0.978268	0.998485	1.02767	0.207026	0.879457	NA	NA	NA	NA	NA	NA	0.314191	0.37663	0.554481	0.0962307	NA	NA
6scwE9OtkpAp7iQX18	ILMN_2647048	ATP6V1D	-1.00226	0.951457	0.998485	1.05408	0.2169	0.883043	1.03416	0.193236	0.998969	-1.01793	0.463283	0.886804	0.107048	0.768497	-0.00791079	0.982696	-0.177951	0.622827
rqHRPXUoEcX2e8e.K0	ILMN_2663872	ATP6V1E1	-1.00214	0.961846	0.998485	-1.01807	0.63598	0.949555	1.06496	0.0527221	0.998969	1.03517	0.195627	0.726276	0.007862	0.982803	-0.240162	0.503913	-0.0157036	0.965657
iUeXXV7nvDLNvvjPAo	ILMN_1218325	ATP6V1F	-1.16739	0.0645553	0.998485	-1.02279	0.668048	0.955862	1.05039	0.358874	0.998969	1.00731	0.80324	0.973606	0.353187	0.316779	-0.399756	0.252389	-0.150282	0.678582
xjSuNYqn2irv4kvh8o	ILMN_2928875	ATP6V1G1	-1.07812	0.283897	0.998485	1.03987	0.496884	0.919326	1.04146	0.181606	0.998969	1.00718	0.844513	0.98367	0.792471	0.00626377	-0.668391	0.0346226	0.268678	0.452887
Q3OE9E5OT1.u5XSRfk	ILMN_1228796	ATP6V1G2	1.05916	0.11199	0.998485	1.0643	0.186869	0.875854	-1.02854	0.386541	0.998969	-1.10983	0.000714176	0.128418	-0.27068	0.449396	0.515531	0.127224	-0.202559	0.574639
KZfaBJNd3LjADpS0hU	ILMN_2640082	ATP6V1G2	1.13585	0.10354	0.998485	1.04629	0.207329	0.879457	-1.01467	0.798951	0.998969	1.0454	0.334627	0.826467	-0.204369	0.571152	0.563516	0.0898075	-0.0627938	0.863179
9vSX.5H1ToUui4gXS0	ILMN_2812935	ATP6V1H	1.02855	0.543199	0.998485	1.00526	0.88761	0.983625	1.00824	0.801469	0.998969	-1.02392	0.381332	0.849242	-0.521336	0.122259	-0.270174	0.450277	0.287438	0.420654
NUR7ACX6qOecvAvRuQ	ILMN_2747430	ATP7A	1.01318	0.546139	0.998485	NA	NA	NA	-1.01017	0.545086	0.998969	1.02443	0.188525	0.717442	-0.350773	0.32033	NA	NA	0.0249719	0.945408
ZgvSifimA3QhWpktsc	ILMN_1246298	ATP8A1	1.06592	0.27398	0.998485	-1.01466	0.789166	0.973718	-1.01314	0.769915	0.998969	-1.00914	0.713444	0.955244	-0.342615	0.332483	0.37154	0.290463	-0.138064	0.703676
xOmeuJ3uqle96Dq3To	ILMN_2635738	ATP8A2	-1.02974	0.259296	0.998485	NA	NA	NA	NA	NA	NA	NA	NA	NA	-0.292005	0.412974	NA	NA	NA	NA
cRIEtVedx4KXe6vsso	ILMN_2977129	ATP8B1	-1.00543	0.778015	0.998485	1.00082	0.970225	0.996149	-1.02672	0.235201	0.998969	-1.01718	0.474838	0.891713	0.0584493	0.872578	-0.357003	0.311207	-0.508016	0.133834
c0LF5ohr3VRUnHYJ0c	ILMN_1255220	ATP9A	-1.04109	0.50637	0.998485	1.00546	0.941652	0.994083	1.02681	0.62482	0.998969	-1.08849	0.0130656	0.370127	0.462577	0.178251	-0.0695308	0.848635	0.185342	0.608207
3EJ6ISUbkSUIGRN64U	ILMN_2629528	ATP9A	1.13844	0.0768043	0.998485	-1.00312	0.944521	0.994451	-1.02129	0.673095	0.998969	-1.03525	0.204212	0.730939	-0.497375	0.143549	0.308107	0.386435	-0.164596	0.649544
Hf5HLH_zOXud9J_F1U	ILMN_2700425	ATP9B	1.00074	0.983824	0.998485	-1.01293	0.72975	0.964704	-1.03824	0.331077	0.998969	-1.03793	0.157784	0.688434	-0.242246	0.500105	0.288971	0.418068	-0.111783	0.758508
cig96XyLyVSi_5uSd4	ILMN_3002875	ATP9B	-1.03106	0.453403	0.998485	1.02	0.643303	0.94997	-1.00202	0.952504	0.998969	-1.02391	0.485399	0.895877	-0.207669	0.564813	-0.0847731	0.815886	-0.288987	0.418042
c3o17jHe_lrFx6nV0k	ILMN_2601118	ATPAF2	1.0441	0.253169	0.998485	1.014	0.642514	0.949816	1.01058	0.706509	0.998969	1.03898	0.0769737	0.586444	0.279578	0.434027	-0.529831	0.115214	0.112774	0.75642
3ALg3_ip6Ijp0mvGIk	ILMN_2959285	ATPAF2	1.00907	0.785348	0.998485	-1.03127	0.350211	0.898965	1.00095	0.97472	0.998969	1.00194	0.927617	0.991937	0.400712	0.25115	0.740611	0.0142822	-0.220349	0.540716
cSLpWzR1UbeyETp.g4	ILMN_1250068	ATPIF1	-1.12146	0.180745	0.998485	1.02565	0.355837	0.899208	1.01733	0.481558	0.998969	-1.01494	0.488732	0.895877	0.00781533	0.982905	-0.504984	0.13656	0.125086	0.730616
HJIYxnt5qEe5555Mlw	ILMN_1225014	ATRIP	1.03099	0.281008	0.998485	-1.01219	0.791165	0.973843	1.04332	0.249127	0.998969	-1.04608	0.0703263	0.57479	0.0917622	0.800952	0.417948	0.2294	-0.0680942	0.851733
iRSCUreKt99JlPiL9U	ILMN_1254409	ATXN1	-1.10695	0.101957	0.998485	1.04377	0.577949	0.936974	-1.04068	0.460794	0.998969	-1.01361	0.648853	0.93788	0.17455	0.629594	0.273375	0.444715	-0.288873	0.418234
ECLqjAePeC3DDhNVWU	ILMN_2771326	ATXN10	1.06182	0.429098	0.998485	1.03608	0.451229	0.913041	-1.04477	0.36678	0.998969	1.02305	0.521624	0.902475	0.0686777	0.850474	-0.0867835	0.811584	-0.0861924	0.812849
Hoo7.oWLIpOyofunvU	ILMN_3136056	ATXN2	1.01572	0.79256	0.998485	-1.02683	0.575095	0.936104	1.0352	0.348834	0.998969	-1.04156	0.144743	0.675683	-0.18629	0.60634	0.656053	0.0394	-0.292505	0.412137
xoUtclW1UFX9X6ovqo	ILMN_1241354	ATXN2L	-1.02387	0.503829	0.998485	1.00453	0.843655	0.97945	-1.01521	0.468983	0.998969	1.01547	0.608936	0.929063	0.572892	0.0834395	0.192283	0.594591	0.537163	0.135872
Tt3BHkAoiS6dEuwXG8	ILMN_2813286	ATXN3	1.02189	0.549807	0.998485	1.01403	0.499454	0.919326	-1.01518	0.426249	0.998969	1.0217	0.327983	0.820917	-0.504099	0.137362	0.275866	0.440409	0.414604	0.233533
3KS7o7nS6yJLxculSk	ILMN_2813284	ATXN3	1.09656	0.0398106	0.998485	1.0266	0.293603	0.891024	1.01489	0.487415	0.998969	-1.01289	0.505842	0.900776	0.0929918	0.79833	-0.26907	0.452204	-0.666906	0.0351757
908GIC5eVHkGiWUkXU	ILMN_2783940	ATXN7L2	1.00603	0.863027	0.998485	-1.01158	0.810645	0.976557	-1.01964	0.539053	0.998969	-1.02409	0.231556	0.755297	-0.410797	0.238289	0.409485	0.239941	0.390363	0.264739
ElI7lc1fjziSuWX.qs	ILMN_2875915	AU019823	1.04474	0.271415	0.998485	1.0068	0.748362	0.967209	1.01755	0.382274	0.998969	-1.03498	0.181776	0.71364	-0.384118	0.273129	0.19425	0.590752	0.459606	0.181425
ZwC36iJKlKgJKvoi6o	ILMN_2825905	AU021092	1.03888	0.140132	0.998485	1.02619	0.202856	0.875854	1.00144	0.931516	0.998969	NA	NA	NA	0.299236	0.400951	-0.287252	0.420969	0.25483	0.47737
loEp7VTh9frlxCeQTg	ILMN_2893437	AU022252	-1.02595	0.454693	0.998485	1.02094	0.50884	0.920144	1.00514	0.831543	0.998969	1.01388	0.501764	0.899728	0.360007	0.306858	-0.479518	0.160793	-0.67406	0.0325654
oYuzuVPXTK3fp53Qrw	ILMN_1237034	AU040320	-1.01721	0.68923	0.998485	1.041	0.108365	0.865421	1.00156	0.958383	0.998969	-1.00053	0.985573	0.998221	-0.383213	0.30866	-0.122247	0.736545	0.531232	0.114077
TAUF1YkpJASApVGeJI	ILMN_3097151	AU040320	1.01445	0.502444	0.998485	NA	NA	NA	NA	NA	NA	NA	NA	NA	0.211493	0.557503	NA	NA	NA	NA
l1YuGn1552Zx53GZa0	ILMN_1252199	AUP1	1.06325	0.154507	0.998485	-1.00497	0.872743	0.982265	1.06425	0.145376	0.998969	1.06605	0.0291011	0.454315	-0.0561084	0.877649	0.252143	0.482186	-0.00701022	0.984666
EDiVAoEo6xUiWShoh4	ILMN_2682623	AUP1	1.02267	0.573618	0.998485	-1.02611	0.380616	0.899257	-1.0196	0.537016	0.998969	1.04924	0.111104	0.632215	0.375582	0.284829	-0.515638	0.127132	0.00881067	0.980728
iuEVPSrfv1LbeCVuag	ILMN_2617228	AURKA	NA	NA	NA	NA	NA	NA	NA	NA	NA	-1.01074	0.528881	0.903357	NA	NA	NA	NA	NA	NA
HVgjcXggQMN6vXtXek	ILMN_2603581	AURKAIP1	-1.07739	0.30526	0.998485	1.0063	0.886208	0.983328	1.01174	0.78231	0.998969	1.03744	0.152786	0.682376	0.151993	0.675091	-0.192004	0.595135	-0.135996	0.707951
xtenThGihEfXb1Es48	ILMN_3052726	AUTS2	1.04945	0.275144	0.998485	1.05421	0.231598	0.883779	-1.01916	0.543041	0.998969	-1.02224	0.495783	0.897981	0.118867	0.743621	-0.451338	0.190428	0.133517	0.713084
ZbTyAz6CqONCuPqJJI	ILMN_2675765	AUTS2	1.00092	0.967943	0.998485	NA	NA	NA	NA	NA	NA	NA	NA	NA	-0.215315	0.550233	NA	NA	NA	NA
6klCRNgg7RYoInooek	ILMN_2919343	AVEN	-1.01101	0.738729	0.998485	-1.08262	0.0869059	0.865421	1.0329	0.165746	0.998969	-1.00061	0.978317	0.998221	0.474883	0.165462	0.230659	0.521433	-0.324698	0.359988
cELnIlVaB6DCUpVErw	ILMN_2813186	AVPI1	-1.0327	0.445914	0.998485	1.08084	0.00328899	0.819637	1.04469	0.17089	0.998969	1.00617	0.788658	0.969383	0.485405	0.154977	-0.30395	0.393206	0.299765	0.400079
KEaXUmJLeoHVogQucg	ILMN_2755585	AVPI1	-1.07242	0.181024	0.998485	1.04241	0.243385	0.883779	1.01655	0.477834	0.998969	1.02574	0.28151	0.789187	0.611097	0.0605217	0.529168	0.14293	-0.300449	0.398951
rXXkEg.s5Wl7kHijEs	ILMN_2626980	AW540478	-1.00281	0.936642	0.998485	-1.00847	0.792408	0.973843	-1.00912	0.687876	0.998969	1.01035	0.690847	0.949133	-0.537049	0.109432	0.503205	0.138174	0.382462	0.275378
HZxwfrefsj5_3XqlX8	ILMN_1237132	AW549877	1.00746	0.87605	0.998485	1.04328	0.29555	0.891024	-1.04721	0.158078	0.998969	-1.04511	0.20665	0.733731	-0.620206	0.0557502	0.449705	0.192237	-0.204226	0.598144
9bjenk5Q6QoPgoYuok	ILMN_2721980	AW551984	-1.00464	0.852386	0.998485	NA	NA	NA	NA	NA	NA	NA	NA	NA	-0.0487012	0.893718	NA	NA	NA	NA
fdTHy9d7R.JfQVpPrE	ILMN_2685769	AW555464	1.02459	0.747773	0.998485	-1.05621	0.437478	0.913041	1.00322	0.921247	0.998969	-1.05083	0.105909	0.622341	0.00282949	0.993811	0.176337	0.626035	0.294121	0.409439
6uypIm_FR6cufh_oNI	ILMN_2896314	AXIN2	-1.01414	0.775747	0.998485	-1.00889	0.793584	0.973843	1.04365	0.200415	0.998969	-1.0296	0.242318	0.763933	0.32235	0.363675	-0.184403	0.610058	0.394886	0.258751
TfiUtVzl73gu6HeuXU	ILMN_2651715	AXL	-1.0099	0.819834	0.998485	-1.0258	0.567832	0.934588	-1.02694	0.396557	0.998969	1.01756	0.613748	0.929414	-0.434239	0.209863	-0.324421	0.360422	0.199216	0.581102
ETd4vcLhNlfqOGJQl4	ILMN_1244993	AZI1	1.01413	0.691733	0.998485	-1.0178	0.546973	0.931317	-1.02546	0.286041	0.998969	-1.04471	0.0879621	0.599853	-0.21821	0.544752	0.334007	0.34556	0.00861383	0.981159
WTr_iQieoceKCi5Lhc	ILMN_3082580	AZI2	1.02138	0.452727	0.998485	-1.01274	0.699113	0.957885	-1.02529	0.426953	0.998969	1.03842	0.197606	0.72926	-0.393755	0.260241	-0.532475	0.113074	0.399893	0.252211
3t59wX596R4HPckilI	ILMN_1238799	AZIN1	1.02394	0.364296	0.998485	1.01353	0.666811	0.955814	1.00369	0.832166	0.998969	-1.03451	0.192457	0.722032	-0.417267	0.230239	0.22599	0.53013	-0.513474	0.129013
Evh6urd3ELU.rznl_g	ILMN_2805207	B020018G12RIK	-1.06964	0.304351	0.998485	-1.04384	0.422843	0.90753	-1.03855	0.17567	0.998969	1.00301	0.915628	0.991497	0.36628	0.297881	-0.680839	0.0302163	0.00153081	0.996651
6ioGLIioxKR4IKMK6k	ILMN_2726101	B230118H07RIK	-1.03282	0.149324	0.998485	-1.00482	0.865901	0.981351	1.03041	0.126535	0.998969	NA	NA	NA	0.113785	0.754292	-0.780922	0.00766284	0.312833	0.378808
oogujbqDJoo0h7ouRo	ILMN_1256000	B230120H23RIK	1.04922	0.0344402	0.998485	-1.02551	0.211443	0.882971	NA	NA	NA	NA	NA	NA	0.429084	0.215938	-0.433123	0.211169	NA	NA
ZkUy6uufootnrrv798	ILMN_2981623	B230206H07RIK	-1.01961	0.389589	0.998485	NA	NA	NA	NA	NA	NA	NA	NA	NA	-0.311195	0.414997	NA	NA	NA	NA
059EJKb1fsF0KkBHjQ	ILMN_3040617	B230217C12RIK	1.00218	0.96428	0.998485	1.01501	0.618602	0.946819	-1.00611	0.857121	0.998969	-1.05572	0.104062	0.622341	0.632412	0.049756	-0.030237	0.933917	0.00752869	0.983532
BIgS9Koxxjj53tL1_0	ILMN_2847869	B230219D22RIK	1.04009	0.632928	0.998485	1.0942	0.183891	0.875854	1.01234	0.814797	0.998969	-1.02455	0.60763	0.928756	0.143864	0.691729	0.441406	0.201584	-0.133878	0.712335
Qdp.dz1.1f15X0FTfY	ILMN_2603662	B230312A22RIK	1.00282	0.92291	0.998485	-1.05026	0.222387	0.883779	-1.00163	0.95377	0.998969	-1.04895	0.0897255	0.604039	0.214688	0.551424	0.497389	0.143536	-0.0692649	0.849208
WqByiIPr15.23XrrtI	ILMN_3160936	B230340J04RIK	-1.00465	0.838591	0.998485	NA	NA	NA	-1.01108	0.528691	0.998969	-1.01986	0.341397	0.829392	0.145254	0.688876	NA	NA	0.280636	0.464497
oowJuuyd03uV6PHIVI	ILMN_2671128	B230373P09RIK	1.04151	0.447355	0.998485	-1.02032	0.562255	0.93336	-1.02714	0.244031	0.998969	-1.01035	0.663253	0.940675	-0.552032	0.098021	-0.638857	0.0467716	-0.335636	0.343065
30VUeIeMTGXki8JOUs	ILMN_2739999	B2M	-1.14426	0.109183	0.998485	-1.08981	0.114593	0.865421	1.02539	0.547538	0.998969	1.18877	6.50347e-05	0.0534585	0.457638	0.183544	-0.72815	0.0169482	-0.178893	0.620956
39FVHiHjExl5IvCTlI	ILMN_1216746	B2M	-1.1752	0.0562157	0.998485	-1.04151	0.588249	0.939333	-1.006	0.853495	0.998969	1.1961	2.74772e-05	0.0376831	0.210845	0.558739	-0.66492	0.0359243	-0.247414	0.490713
Ql6ngHTonVyEotCl4E	ILMN_2805714	B3GALNT1	1.02853	0.57452	0.998485	-1.03137	0.373379	0.899257	1.019	0.364036	0.998969	-1.0309	0.22988	0.755214	0.482963	0.157374	0.106379	0.769911	0.408483	0.241207
BMH1wqvngvV6Lqpfmo	ILMN_2943762	B3GALNT2	-1.01064	0.595929	0.998485	NA	NA	NA	NA	NA	NA	NA	NA	NA	-0.499573	0.141507	NA	NA	NA	NA
9CeuJpODqiKHkV.514	ILMN_3142602	B3GALT4	1.00033	0.991749	0.998928	1.00015	0.99519	0.999326	-1.01422	0.400847	0.998969	-1.04138	0.0408856	0.497378	-0.0396899	0.913315	-0.0716531	0.844061	-0.28285	0.428435
uXuuNy9dT.dEkB3gnk	ILMN_2632971	B3GALT4	1.00193	0.941251	0.998485	-1.00897	0.706823	0.960588	1.00965	0.640675	0.998969	-1.00554	0.85103	0.984525	-0.13751	0.70482	-0.289306	0.417506	-0.0427733	0.906604
xqiVIZ58T3n0qAzSKI	ILMN_1245509	B3GALT5	1.02375	0.534691	0.998485	-1.01593	0.807916	0.976172	-1.02302	0.521924	0.998969	1.00725	0.768711	0.964968	-0.337295	0.340534	0.177637	0.623449	0.00144078	0.996848
Zq7uJs6HsKR_o0g7UQ	ILMN_2687140	B3GALT6	1.03677	0.29343	0.998485	-1.01117	0.72908	0.964704	1.03177	0.150163	0.998969	-1.06829	0.00791736	0.323784	-0.442859	0.199928	0.04565	0.900348	-0.585855	0.075125
HBXroeaX03e_oOL__Q	ILMN_2708717	B3GAT1	1.10487	0.324416	0.998485	1.08338	0.550521	0.931317	-1.05515	0.236801	0.998969	1.03832	0.269796	0.777817	0.347257	0.325539	0.743924	0.0136261	0.300827	0.398329
l6riorSAFce6Lkk6d0	ILMN_2724433	B3GAT1	1.02735	0.296644	0.998485	1.00936	0.65123	0.952908	1.02283	0.304855	0.998969	1.00574	0.787236	0.969347	-0.301271	0.397598	0.464508	0.176207	-0.160281	0.658255
6kjnH0vv9Ow7XV9Hk4	ILMN_2853122	B3GAT1	1.02063	0.873238	0.998485	1.12333	0.254993	0.884118	1.00616	0.885999	0.998969	-1.01558	0.62936	0.935008	0.291628	0.413606	0.788182	0.00676005	0.0927523	0.798841
WBcI4JKKJJxBpKlKnQ	ILMN_2845045	B3GAT3	-1.01954	0.666752	0.998485	-1.02792	0.420077	0.90753	1.04645	0.232747	0.998969	-1.03072	0.227628	0.752886	0.481513	0.158807	0.170193	0.6383	0.180946	0.616888
rUX7I1QoXolGp5Q_x0	ILMN_2729706	B3GAT3	1.04385	0.254958	0.998485	1.00367	0.887387	0.983504	-1.00068	0.986568	0.998969	-1.02785	0.261448	0.774312	0.141396	0.716707	-0.316411	0.373083	0.247497	0.490562
fuV1LK_p50.l9o4Tzs	ILMN_1257876	B3GNT1	1.02072	0.725894	0.998485	-1.04874	0.232671	0.883779	1.03694	0.25423	0.998969	-1.00848	0.75906	0.962988	-0.560584	0.0918613	-0.298657	0.401908	0.370554	0.291845
NfYeYR9xRRzR2CYpO4	ILMN_2789862	B4GALNT4	1.02331	0.563495	0.998485	1.01168	0.778246	0.972372	-1.00846	0.833902	0.998969	1.03268	0.316964	0.813295	-0.395976	0.257319	0.301349	0.397471	0.13299	0.714175
x0jG69PdKFCoB7fl7U	ILMN_2667369	B4GALT1	-1.00772	0.680565	0.998485	-1.01211	0.615415	0.945942	1.00521	0.745327	0.998969	-1.00467	0.785147	0.968871	0.061866	0.874369	-0.199322	0.580896	-0.527592	0.117045
6HKqS7d9SqoPXSN6IU	ILMN_2715436	B4GALT2	-1.01118	0.678377	0.998485	NA	NA	NA	NA	NA	NA	NA	NA	NA	0.525315	0.118927	NA	NA	NA	NA
uOvXCCe3rooBVyWpP0	ILMN_2930764	B4GALT3	1.03377	0.561141	0.998485	1.05843	0.201804	0.875854	-1.03295	0.231807	0.998969	-1.06152	0.0742472	0.585631	-0.505412	0.136172	-0.481684	0.158637	0.128319	0.723878
uZenqOCN3YUXF3uoRw	ILMN_1228544	B4GALT3	1.05959	0.284666	0.998485	1.02261	0.592172	0.939387	1.03916	0.370084	0.998969	1.05376	0.0836935	0.5933	-0.311563	0.380851	-0.247665	0.490258	0.102253	0.778645
xsqzg4kvzCUbjh4w7c	ILMN_2704347	B4GALT4	1.00487	0.827609	0.998485	NA	NA	NA	NA	NA	NA	NA	NA	NA	-0.488585	0.151889	NA	NA	NA	NA
xBEJWrgomnjMnsPrlE	ILMN_2754594	B4GALT7	1.0869	0.020372	0.998485	-1.02071	0.490535	0.918591	1.02989	0.244757	0.998969	-1.03851	0.0387168	0.492868	0.262732	0.46333	0.0837611	0.818053	0.0343932	0.924854
ZdI8AfEUMTPUSlL1O4	ILMN_1230054	B630005N14RIK	1.00376	0.922139	0.998485	NA	NA	NA	1.00657	0.850508	0.998969	NA	NA	NA	0.00357593	0.992178	NA	NA	-0.0237263	0.948128
ot.neVvV7iketL5QTc	ILMN_1250201	B930041F14RIK	1.04543	0.301151	0.998485	-1.06936	0.303314	0.891024	-1.04043	0.364855	0.998969	-1.09684	0.00549133	0.280554	0.07379	0.83946	-0.173886	0.630919	-0.204345	0.571198
HVEMANJX3tZR7oUjlc	ILMN_2713969	B9D1	-1.06328	0.343205	0.998485	-1.02958	0.506581	0.920144	-1.00816	0.801424	0.998969	1.00141	0.956016	0.99602	0.0427277	0.906704	-0.224237	0.53341	-0.294985	0.407999
KoqE4kqVHv6HtqpHww	ILMN_2760226	B9D2	-1.00333	0.949554	0.998485	1.05581	0.134109	0.865421	-1.00404	0.900995	0.998969	-1.02801	0.303919	0.802678	0.242728	0.499226	-0.619133	0.0562985	0.00771547	0.983123
0HtdwarnWF5JVq6DJQ	ILMN_1222870	BAALC	-1.02783	0.43261	0.998485	-1.01142	0.64379	0.950054	1.02502	0.447159	0.998969	1.00787	0.768121	0.964968	-0.0117446	0.974312	0.442567	0.232906	-0.138827	0.702102
NRIF0nSld4VIBIOl3o	ILMN_1240833	BAALC	-1.05444	0.107064	0.998485	-1.02531	0.394138	0.902716	1.02634	0.502729	0.998969	1.02386	0.387437	0.852644	-0.141853	0.695865	-0.282516	0.461382	-0.205666	0.568658
ZS7Dwn1KNHFOAGWT3k	ILMN_1217842	BACE1	-1.08608	0.112876	0.998485	1.05035	0.364162	0.899257	-1.00431	0.915336	0.998969	-1.00503	0.865689	0.984632	-0.314393	0.376307	0.734941	0.015456	0.185534	0.607829
fdd9RA5nrj65hbjoKc	ILMN_2720083	BACE2	-1.02162	0.343662	0.998485	-1.02047	0.4279	0.911359	-1.01182	0.646996	0.998969	1.00549	0.819925	0.977542	0.292554	0.412056	-0.487038	0.153386	-0.332673	0.347609
3p7Y03T5K2_OFOKk_g	ILMN_2741677	BACH1	-1.08824	0.158862	0.998485	NA	NA	NA	-1.00482	0.8383	0.998969	NA	NA	NA	0.489569	0.150941	NA	NA	0.193273	0.592658
EdV_7.Vdt3mjHsSQ60	ILMN_2819558	BACH2	1.02832	0.591161	0.998485	-1.00598	0.831339	0.977477	1.00975	0.610492	0.998969	-1.0033	0.883085	0.985977	-0.770994	0.00903127	0.462287	0.17856	-0.620327	0.0556885
Q2e7V.BKiCJ4bEn4tU	ILMN_1216802	BAD	-1.10082	0.136312	0.998485	-1.00361	0.904618	0.987166	-1.01152	0.668123	0.998969	1.02455	0.308197	0.805783	0.582667	0.0771173	-0.187802	0.603368	-0.275406	0.441202
cqQclA7Q.V511tr3Q4	ILMN_2712018	BAG1	1.0269	0.636217	0.998485	1.04673	0.193036	0.875854	-1.00786	0.833441	0.998969	1.00677	0.826928	0.978137	-0.283059	0.428081	0.11154	0.759019	-0.117878	0.745695
9dzkzk3TFOD.yu5ugk	ILMN_1234419	BAG2	-1.0005	0.985864	0.998485	NA	NA	NA	-1.00586	0.762071	0.998969	1.00682	0.704827	0.95358	0.0530007	0.884386	NA	NA	0.105976	0.770763
0lunupzfXvJfoeCq.w	ILMN_1226195	BAG3	1.00696	0.817166	0.998485	-1.23276	0.0862042	0.865421	-1.02838	0.310456	0.998969	1.05238	0.0839788	0.5933	-0.28848	0.418895	-0.410562	0.238585	0.32017	0.367115
BS7uup1wLT27X97Ek4	ILMN_2607892	BAG4	-1.00562	0.907336	0.998485	-1.06363	0.066097	0.865421	1.00488	0.866745	0.998969	-1.00428	0.900592	0.989083	-0.72759	0.0170756	-0.582023	0.0775246	0.098886	0.78579
B6VIE10nF6E4LaGLqI	ILMN_3106819	BAG5	1.00427	0.9155	0.998485	1.09768	0.00793995	0.836218	-1.03977	0.203655	0.998969	1.04416	0.224007	0.748838	0.573743	0.0828763	0.0296756	0.935142	0.251984	0.482471
lUAGHkoI1QcSVUmfVw	ILMN_2736975	BAG6	1.0232	0.624727	0.998485	1.01821	0.692384	0.957376	-1.02495	0.524013	0.998969	-1.04924	0.0801543	0.589207	-0.683995	0.0291632	0.249248	0.487399	0.526952	0.117572
EK1VTX.X9.e7sRkDps	ILMN_1242613	BAHCC1	1.06296	0.200025	0.998485	1.02475	0.377973	0.899257	1.02071	0.37656	0.998969	-1.03103	0.25156	0.77025	-0.379662	0.279204	-0.274344	0.443038	0.217055	0.546936
oi6I6FX_iXnb3KucUI	ILMN_2830098	BAHD1	-1.01131	0.753151	0.998485	1.05633	0.300373	0.891024	1.01816	0.52655	0.998969	-1.06284	0.0158591	0.387024	0.217193	0.546675	-0.204883	0.570162	0.0707319	0.846046
oahUvSueqUIOIG6UX4	ILMN_2680188	BAI1	-1.0529	0.122679	0.998485	1.02947	0.487109	0.918054	1.01912	0.486001	0.998969	-1.00006	0.998111	0.99924	0.253954	0.509654	0.134716	0.710598	0.291004	0.414652
30CeiRfQNzhHqdHlVQ	ILMN_2598946	BAI2	1.04276	0.451727	0.998485	1.06886	0.455266	0.913041	1.06702	0.0741203	0.998969	-1.0248	0.515869	0.900776	-0.160625	0.65756	0.242706	0.499264	0.257041	0.473424
9JVSBZSGmH1ISK7i5Q	ILMN_2813724	BAI2	1.01606	0.772508	0.998485	1.10401	0.499113	0.919326	1.05228	0.353176	0.998969	-1.08989	0.0148853	0.382366	-0.106103	0.770496	0.167178	0.644349	0.169565	0.639559
TYuogu3g.l3o7kIq4c	ILMN_2752639	BAI3	-1.01951	0.616238	0.998485	1.07687	0.249129	0.883779	-1.00155	0.9699	0.998969	1.03851	0.241099	0.763933	-0.120847	0.739475	-0.513084	0.129353	-0.389211	0.266276
0kc6oi4ghQjmqevVfc	ILMN_3163374	BAIAP2	1.02655	0.516258	0.998485	1.01674	0.744687	0.967206	1.04233	0.29269	0.998969	-1.03403	0.234828	0.758739	0.139437	0.720504	0.0158267	0.965388	-0.521072	0.122482
WJPB5auql5aeLpAkm8	ILMN_2733091	BAIAP2	1.0046	0.941822	0.998485	1.16904	0.139595	0.865421	1.02805	0.395304	0.998969	1.04447	0.236162	0.759793	0.254447	0.478055	-0.17819	0.622351	-0.300612	0.398684
c7HUq3OqL3dV0m.Q38	ILMN_2698392	BANF1	-1.05576	0.514759	0.998485	1.05477	0.251941	0.883779	1.06068	0.154612	0.998969	-1.01516	0.612967	0.929414	0.463562	0.177207	-0.482787	0.157547	0.235341	0.51277
E6ol6Wo_uG14kIp6KA	ILMN_2685806	BANF1	-1.00715	0.916655	0.998485	1.04097	0.542033	0.931317	1.01589	0.767174	0.998969	1.02775	0.381781	0.849242	0.523667	0.1203	-0.303732	0.393561	-0.367316	0.296411
cjp77RXRdc7HUq3OqI	ILMN_3158909	BANF1	-1.05803	0.545097	0.998485	1.0382	0.543586	0.931317	1.00876	0.811574	0.998969	1.02919	0.389654	0.852812	0.496166	0.144679	-0.334003	0.345565	-0.252507	0.481532
Q_K3qaiaWLpmKJbxSI	ILMN_2745971	BANF1	-1.08191	0.317467	0.998485	1.0191	0.655603	0.953578	-1.00435	0.923868	0.998969	1.02105	0.457896	0.884316	0.378079	0.28138	-0.460113	0.180881	-0.131378	0.717519
xfkKx0qyoSr4ii8gfc	ILMN_2749866	BAP1	1.02335	0.621806	0.998485	1.01886	0.716681	0.961735	1.00946	0.786978	0.998969	-1.02489	0.346068	0.831169	0.1815	0.615792	0.257348	0.472877	0.331071	0.350078
fKVUKWmCYmWIkamaWE	ILMN_2611812	BASP1	-1.06607	0.0661581	0.998485	-1.02531	0.465605	0.914237	1.00346	0.889399	0.998969	-1.00912	0.706238	0.953971	0.209076	0.56212	-0.00402011	0.991206	-0.145908	0.687534
rdcfahVROkhLhTf7p4	ILMN_2907655	BAX	-1.05795	0.35311	0.998485	-1.00728	0.878207	0.982265	-1.01977	0.453068	0.998969	1.02888	0.338991	0.828788	0.375415	0.28506	-0.117313	0.746881	0.204643	0.570624
fiCV0KruqikoCeoo.A	ILMN_2793270	BAZ1B	-1.01521	0.487327	0.998485	NA	NA	NA	NA	NA	NA	NA	NA	NA	0.40621	0.244092	NA	NA	NA	NA
0XuBXZ_uLoxYbtNCBU	ILMN_2652385	BAZ2A	-1.04122	0.340798	0.998485	NA	NA	NA	NA	NA	NA	NA	NA	NA	0.540272	0.10691	NA	NA	NA	NA
uioaVJewjHsTkeeyMw	ILMN_2920736	BBC3	-1.07699	0.16687	0.998485	1.02346	0.621111	0.947286	-1.02952	0.331135	0.998969	-1.01876	0.5247	0.902691	-0.0481771	0.894857	-0.22105	0.539397	0.146041	0.687261
xlTVXQhLHF4kKIkCr0	ILMN_1237390	BBS1	1.00038	0.985747	0.998485	NA	NA	NA	NA	NA	NA	-1.01192	0.454432	0.884143	-0.575075	0.0819994	NA	NA	NA	NA
BU5weMScKECR1p4CXU	ILMN_1253752	BBS2	1.0003	0.993365	0.99897	1.02466	0.491583	0.919139	1.03416	0.225985	0.998969	1.00945	0.728303	0.957755	-0.392491	0.261911	-0.110211	0.76182	-0.176215	0.626278
KS.CyyLQqet6DaRQgc	ILMN_2726448	BBS4	1.00942	0.825693	0.998485	-1.03048	0.341276	0.898965	-1.01025	0.701483	0.998969	-1.00589	0.841204	0.982732	0.169196	0.640298	0.426602	0.218898	-0.191709	0.595713
6R5Kh.qOLw34OL4noU	ILMN_3162388	BBS5	1.00566	0.888799	0.998485	1.04041	0.359685	0.899257	-1.07318	0.00468894	0.998969	1.04599	0.291964	0.797333	-0.379008	0.280101	0.630108	0.0508529	0.737116	0.0149981
Qgi4aXcJNVcYsVOAtc	ILMN_2656511	BBS7	-1.00862	0.810248	0.998485	1.02528	0.470835	0.915435	1.04208	0.0778961	0.998969	1.01822	0.459468	0.884868	-0.436239	0.207533	0.039683	0.91333	-0.498405	0.14259
WTmfMtKPyQrhgv6oSE	ILMN_2634728	BBS9	1.01483	0.838583	0.998485	1.00533	0.876412	0.982265	1.04375	0.358641	0.998969	-1.02169	0.365575	0.84254	-0.052521	0.885427	-0.161922	0.654937	0.266805	0.456165
xnl.nsnTUkXf8UFIiY	ILMN_2669461	BBX	1.01018	0.673905	0.998485	NA	NA	NA	NA	NA	NA	-1.01899	0.371163	0.844046	-0.161696	0.655394	NA	NA	NA	NA
ZAgkCm73EKV1IntfqQ	ILMN_1248444	BC002230	-1.04065	0.128703	0.998485	1.04201	0.195371	0.875854	1.00529	0.84418	0.998969	-1.01418	0.506861	0.900776	-0.090329	0.80401	0.00921983	0.979833	0.40717	0.242871
xSg7V6dX44p.fP9e7k	ILMN_1247245	BC003266	-1.00861	0.916044	0.998485	-1.06425	0.264453	0.886941	1.05764	0.113382	0.998969	-1.02333	0.467915	0.888147	0.697037	0.0250767	-0.209603	0.561112	0.538046	0.108648
BXeVxf97FKkK4jPr8s	ILMN_1252183	BC004004	1.01248	0.696905	0.998485	-1.01729	0.484306	0.916971	1.0257	0.319349	0.998969	-1.04219	0.104547	0.622341	0.150412	0.678316	-0.194464	0.590334	-0.258634	0.470589
TXW18TlIsDCJPhSQDo	ILMN_1227295	BC005537	-1.00336	0.955857	0.998485	1.06313	0.236715	0.883779	-1.04412	0.399317	0.998969	-1.03165	0.340349	0.828905	0.0489017	0.900577	0.290486	0.415521	-0.0347071	0.92417
Ex6j.IVVFV5P9CRwf4	ILMN_1248400	BC005624	1.02418	0.360568	0.998485	1.01738	0.288567	0.891024	1.00389	0.828449	0.998969	-1.00271	0.86702	0.984632	-0.182451	0.61391	-0.6587	0.0383399	0.52141	0.122196
9JekAe46o8qiequ3Ek	ILMN_2709001	BC005764	-1.03516	0.28242	0.998485	1.02724	0.35375	0.899208	-1.0149	0.510997	0.998969	1.02133	0.344163	0.831169	0.184638	0.609595	-0.679722	0.0305953	0.340216	0.336102
ZBV8X4ORSj8wy4TrdE	ILMN_2637630	BC013529	-1.023	0.531133	0.998485	-1.06101	0.264063	0.886356	-1.00723	0.838917	0.998969	1.00344	0.916948	0.991652	-0.533268	0.139284	0.464612	0.176098	0.388962	0.266608
rovuIin7CJX969xdvg	ILMN_1223300	BC016423	1.02926	0.255125	0.998485	1.02161	0.363064	0.899257	1.00181	0.922921	0.998969	-1.00057	0.979689	0.998221	-0.593777	0.0703191	0.161702	0.655381	0.144547	0.690328
HltISAVdeAkIOn4XRU	ILMN_1242106	BC016495	-1.00158	0.944182	0.998485	NA	NA	NA	NA	NA	NA	NA	NA	NA	0.420536	0.22623	NA	NA	NA	NA
6pXlS1bv0VQv8rcRYg	ILMN_1249131	BC017158	-1.0185	0.657458	0.998485	-1.03516	0.268007	0.887879	-1.00336	0.897392	0.998969	-1.01002	0.544543	0.907677	-0.623328	0.0541738	-0.0335341	0.926727	0.615579	0.0581417
cQKX4pR7FwliTrLykI	ILMN_1255776	BC017643	-1.03504	0.273081	0.998485	-1.01522	0.714574	0.961735	-1.01416	0.562647	0.998969	1.00718	0.800307	0.972949	-0.452676	0.188954	-0.854039	0.00165866	0.705713	0.0225873
uvl3tQHSc_10NeXFdU	ILMN_1233664	BC017647	1.00251	0.96364	0.998485	1.05338	0.260793	0.886136	-1.05819	0.190185	0.998969	1.00641	0.794026	0.970355	-0.36221	0.30369	0.535194	0.1109	0.154826	0.66932
Zzxyp7oA4fz.dqFRX0	ILMN_2850073	BC018242	1.03175	0.44066	0.998485	1.05072	0.517578	0.925219	1.0283	0.346097	0.998969	-1.05055	0.190352	0.720017	0.63203	0.0499371	0.0101379	0.977826	0.228698	0.525078
3q5x7pa70LtwElDCJU	ILMN_2757716	BC018242	1.06048	0.28615	0.998485	1.13618	0.189568	0.875854	-1.00111	0.97653	0.998969	-1.04235	0.159964	0.689979	0.454507	0.186947	0.405507	0.244988	0.126353	0.727973
Hg2dRcemhIAj9Q9GVQ	ILMN_2745876	BC020535	-1.02907	0.257837	0.998485	NA	NA	NA	NA	NA	NA	NA	NA	NA	0.125472	0.72981	NA	NA	NA	NA
3unRL6NTi9ILSCMnng	ILMN_2631663	BC022687	-1.0058	0.817332	0.998485	1.04798	0.231531	0.883779	1.0291	0.268907	0.998969	-1.05039	0.0674032	0.567088	0.498362	0.14263	-0.236204	0.511179	0.39159	0.263107
0XkC2Ik95cXkIIEeTE	ILMN_2612616	BC023829	1.02937	0.295623	0.998485	-1.06214	0.0171977	0.865421	1.00882	0.796398	0.998969	1.00159	0.942708	0.994016	-0.0397582	0.913166	-0.390076	0.265121	-0.276298	0.439664
o8ER.Vh61Eh4AOXkWU	ILMN_2592909	BC024814	1.01645	0.679282	0.998485	-1.00298	0.936323	0.994016	1.02413	0.338361	0.998969	-1.05147	0.0821612	0.593169	0.617078	0.0573594	-0.536679	0.109723	0.571284	0.0845104
cVOC7hfvsq.6EJMlSo	ILMN_2918278	BC025920	-1.00615	0.717118	0.998485	1.01114	0.615077	0.945942	1.01875	0.281101	0.998969	1.01477	0.45277	0.883321	0.570727	0.0848831	0.0996658	0.784134	-0.278882	0.467412
oRIT15cB8FX3uJAKx4	ILMN_1221257	BC026585	1.02989	0.265235	0.998485	-1.04132	0.471457	0.915435	-1.04131	0.132706	0.998969	1.01565	0.468598	0.888147	0.292334	0.412423	-0.0636468	0.861335	0.283133	0.427955
rJ14gI_6.xL3tFKiwE	ILMN_1257772	BC026590	1.02734	0.555501	0.998485	1.05274	0.186461	0.875854	-1.01865	0.674028	0.998969	-1.05811	0.0546321	0.529872	-0.627197	0.0522618	0.430859	0.213835	-0.067359	0.853319
TSSCkJXEeGiX.dSXR0	ILMN_3051252	BC026590	1.02965	0.576416	0.998485	1.01786	0.650335	0.952264	-1.00225	0.949896	0.998969	1.01701	0.362042	0.840137	-0.476111	0.164217	-0.0923262	0.799749	0.245736	0.493754
xkyTTu.FTqeJTdeVK0	ILMN_2913269	BC027231	1.0043	0.845056	0.998485	-1.00939	0.584349	0.938971	1.00062	0.975071	0.998969	1.00581	0.72863	0.957813	-0.703294	0.0232635	-0.273782	0.44401	-0.244711	0.495615
Zl0eF0dX.Av8z.uYq4	ILMN_2718550	BC027231	-1.00225	0.934943	0.998485	NA	NA	NA	NA	NA	NA	NA	NA	NA	-0.161187	0.656423	NA	NA	NA	NA
0l30xLfTEgfOhXSDXs	ILMN_2837802	BC028528	-1.02939	0.376118	0.998485	-1.02087	0.316776	0.894812	1.01686	0.389647	0.998969	1.09388	0.00065926	0.120425	0.469387	0.171104	-0.399632	0.25255	0.186956	0.605032
fXSDXsFGAUuFEgUuFE	ILMN_2656422	BC028528	-1.06263	0.173006	0.998485	-1.0265	0.381587	0.899257	-1.0115	0.58105	0.998969	1.05168	0.0120426	0.360323	0.656017	0.0394148	0.212994	0.554645	0.200122	0.579348
iUol5eQoCqI3KFVw0g	ILMN_2768209	BC029214	-1.02405	0.673686	0.998485	-1.02533	0.582056	0.938665	1.02452	0.34671	0.998969	1.00201	0.926203	0.991795	0.309688	0.383875	-0.0289564	0.936711	-0.32028	0.36694
fqKSKSij94vYoSUjeQ	ILMN_2819380	BC030476	-1.20655	0.00606779	0.896559	1.19782	0.36624	0.899257	-1.17127	0.216911	0.998969	-1.00036	0.995565	0.998817	-0.086323	0.812569	0.383761	0.273614	0.324812	0.359811
cCuHwo7i4SVruumRl8	ILMN_2822160	BC030499	1.01912	0.579266	0.998485	1.01598	0.732522	0.964881	-1.04856	0.230913	0.998969	-1.00396	0.914266	0.991054	-0.102174	0.778814	0.280188	0.432982	-0.0681261	0.851664
uutl1_8S3Ii45Uzn4g	ILMN_2714956	BC030500	1.01072	0.612637	0.998485	NA	NA	NA	1.00443	0.804893	0.998969	NA	NA	NA	0.204916	0.570099	NA	NA	0.186931	0.60508
QNHkpkmmLoSeliFJ1A	ILMN_2913206	BC031181	-1.08376	0.101747	0.998485	-1.04135	0.324784	0.895167	1.02028	0.736542	0.998969	-1.03619	0.176018	0.708759	0.516615	0.126288	-0.277146	0.438203	0.159417	0.660004
c9cLoegkVu22V._x74	ILMN_2757807	BC031353	-1.00652	0.913739	0.998485	1.11256	0.0769442	0.865421	-1.02012	0.64446	0.998969	1.0433	0.18699	0.715516	-0.563493	0.0898233	0.260661	0.466992	-0.15385	0.671306
HkmQ91n0wFKEuSJqVI	ILMN_2703242	BC031575	-1.00176	0.954558	0.998485	NA	NA	NA	NA	NA	NA	NA	NA	NA	-0.39861	0.253878	NA	NA	NA	NA
0f6rv9K7lwO3Hfed6I	ILMN_2894040	BC031781	1.01037	0.826872	0.998485	1.06478	0.0557939	0.865421	1.02902	0.368667	0.998969	1.02983	0.24829	0.767892	-0.041045	0.910365	0.33908	0.337821	0.184851	0.609175
rSq_jpd.eVdO.G_kl4	ILMN_1257019	BC037034	-1.0219	0.752378	0.998485	-1.07395	0.119368	0.865421	-1.00382	0.898734	0.998969	-1.03728	0.145224	0.675683	-0.520367	0.12308	-0.568459	0.0864127	0.473568	0.166802
ltt4x1s_yf_1k7xxXs	ILMN_2738156	BC039093	-1.09104	0.0743812	0.998485	1.0658	0.225766	0.883779	1.00431	0.887291	0.998969	-1.05574	0.185817	0.71497	0.0173879	0.961976	0.382326	0.275563	0.651143	0.0574848
QWXdOte3lK_0RTMyQQ	ILMN_1240038	BC046331	1.04544	0.0944232	0.998485	-1.00125	0.954626	0.994812	1.00803	0.703821	0.998969	1.00842	0.69121	0.949218	-0.36415	0.300914	0.46199	0.210578	0.201762	0.576178
oniHlSC.EueCeh5cEU	ILMN_3158698	BC046404	-1.03163	0.472405	0.998485	1.07255	0.367186	0.899257	-1.02184	0.347683	0.998969	-1.08747	0.0155502	0.386493	-0.151347	0.676409	-0.377954	0.281551	0.209092	0.589257
EqSJwISBdXDTvkS9MI	ILMN_2596666	BC048403	NA	NA	NA	NA	NA	NA	-1.00688	0.676577	0.998969	NA	NA	NA	NA	NA	NA	NA	0.118043	0.745349
cuCOd3p.HXtt01Fiic	ILMN_2531773	BC048546	-1.06863	0.341683	0.998485	1.00529	0.904244	0.987166	-1.02817	0.269223	0.998969	1.00101	0.976145	0.997851	0.311144	0.381525	-0.084717	0.816006	-0.225789	0.530505
B7gjnd6fx17bdNRYok	ILMN_2984219	BC048546	-1.02813	0.677907	0.998485	1.01481	0.759929	0.969424	-1.00785	0.826538	0.998969	1.01002	0.73379	0.958545	0.475486	0.164851	0.241792	0.500934	-0.262396	0.463922
f6nVJ4OgoL6d.f6pXk	ILMN_2939185	BC056474	-1.09739	0.210167	0.998485	1.02045	0.644378	0.950072	1.06425	0.0552858	0.998969	1.02675	0.419932	0.868544	0.504829	0.1367	-0.0844213	0.816639	-0.201423	0.576832
NeqFLqKuF6ewegxUNQ	ILMN_2997861	BC057022	-1.01371	0.558165	0.998485	-1.03147	0.120575	0.865421	1.00671	0.719485	0.998969	1.04385	0.0165949	0.389168	-0.138416	0.70295	-0.0289441	0.936738	-0.188299	0.602393
HirE4gYEebgxoy46l4	ILMN_1238995	BC062650	-1.00193	0.930501	0.998485	1.00017	0.994881	0.999326	1.03155	0.234414	0.998969	-1.01738	0.431733	0.87274	-0.220498	0.540435	-0.283448	0.427417	0.118808	0.743745
uD1UuMiEHUv17q64l0	ILMN_2869654	BC065397	1.00053	0.989436	0.998639	-1.01809	0.310003	0.892493	-1.03777	0.0842372	0.998969	1.00644	0.791141	0.969995	0.413134	0.235363	0.44395	0.198691	0.216552	0.54789
Bp1_TIBHj3342H_8Xg	ILMN_2713396	BC067068	1.03532	0.275959	0.998485	1.00074	0.971889	0.996199	-1.02947	0.258579	0.998969	1.00033	0.985991	0.998221	-0.222339	0.536972	0.0931492	0.797995	0.256242	0.474848
Hi_peAjgdiyCDri1_E	ILMN_2690232	BC068157	-1.05392	0.21276	0.998485	1.02389	0.650305	0.952264	1.00312	0.909585	0.998969	-1.01182	0.650174	0.93788	0.47999	0.160321	0.351926	0.318632	0.42491	0.22093
0nkERqAuOthiCl6BBc	ILMN_2835053	BC088983	1.03031	0.180912	0.998485	1.01603	0.478521	0.915974	-1.00747	0.669313	0.998969	1.00639	0.724049	0.957615	-0.294061	0.409539	-0.441494	0.201483	0.0229323	0.949862
oGXeXX191JdpXV9fXc	ILMN_2765224	BCAM	1.01326	0.533522	0.998485	1.00676	0.791307	0.973843	NA	NA	NA	-1.0123	0.574046	0.915882	-0.531625	0.113759	-0.264964	0.459398	NA	NA
uIKFGqEndikSgpFvhE	ILMN_2636745	BCAN	1.02201	0.482937	0.998485	-1.01602	0.674866	0.956993	1.01258	0.600177	0.998969	1.00313	0.906097	0.989293	-0.0227148	0.950337	0.576286	0.0812078	0.45204	0.189654
WqLFLo_p0OEoU2KuH0	ILMN_2670486	BCAN	1.15402	0.0234372	0.998485	1.03963	0.470396	0.915435	-1.01537	0.652048	0.998969	1.05481	0.105401	0.622341	-0.326307	0.357474	0.356136	0.312469	-0.250776	0.484644
ucaXyp30JdOPsQXHYA	ILMN_2645620	BCAP29	1.00736	0.861751	0.998485	-1.05191	0.217724	0.88352	1.07762	0.0297391	0.998969	-1.00092	0.975654	0.99777	-0.0751578	0.836518	-0.550504	0.0991484	0.41017	0.27287
KSR74y7u_ce597lzCE	ILMN_2866752	BCAP29	1.02157	0.697422	0.998485	-1.05183	0.18761	0.875854	1.0344	0.433188	0.998969	1.00514	0.867914	0.984632	-0.218896	0.543457	0.192913	0.59336	-0.293788	0.409995
0pzkgkt4qXxQIM4WXk	ILMN_2871262	BCAP31	-1.05522	0.334084	0.998485	-1.06941	0.370396	0.899257	1.10109	0.00111921	0.998969	-1.01603	0.493556	0.896439	0.00906734	0.980167	-0.483355	0.156987	0.242335	0.529844
3IEIl4IOF4oJwCOJ6U	ILMN_2611501	BCAP31	-1.02981	0.411989	0.998485	-1.06187	0.215516	0.883043	-1.01245	0.772804	0.998969	-1.01393	0.515824	0.900776	0.114343	0.75312	0.206977	0.56614	-0.236489	0.510654
cLKLsW6nqjRSj65E6k	ILMN_2743133	BCAR1	1.0809	0.0553308	0.998485	1.03236	0.419031	0.90753	1.01789	0.534524	0.998969	1.00445	0.86799	0.984632	-0.01282	0.971961	-0.271626	0.447751	-0.189787	0.599474
fiofn03va3hnzdGXt4	ILMN_2662264	BCAS1	1.07946	0.377658	0.998485	-1.10347	0.462309	0.914154	1.09441	0.180499	0.998969	-1.01197	0.765874	0.964955	-0.564968	0.0888018	0.410408	0.238778	-0.44402	0.198611
ipNQTvegnoBfg.u..s	ILMN_1259127	BCAS2	-1.01898	0.69567	0.998485	-1.03451	0.628673	0.948554	-1.02367	0.830793	0.998969	-1.09427	0.0559869	0.536467	-0.00101673	0.997776	0.230081	0.522506	0.15774	0.663401
ogqC5LxYpbtALkbftQ	ILMN_2669958	BCAS3	-1.01546	0.699975	0.998485	1.08042	0.0378862	0.865421	1.02879	0.37439	0.998969	-1.02341	0.468396	0.888147	0.132036	0.716154	-0.230115	0.522443	0.0563686	0.877085
TiHKrXuX3I3_TXQJUk	ILMN_3131478	BCAT1	1.04885	0.325856	0.998485	-1.08766	0.324928	0.895167	-1.05193	0.374762	0.998969	-1.00757	0.82633	0.977831	-0.154329	0.670331	0.212306	0.555954	-0.00242597	0.994693
9n4CX9qi_MEI1j71pY	ILMN_2656827	BCAT1	1.02689	0.441528	0.998485	-1.02281	0.512211	0.921314	-1.0261	0.269634	0.998969	1.00296	0.90218	0.989293	-0.0840176	0.817503	-0.245161	0.494797	0.0916822	0.801122
NcejAYIaIIonpBlVHI	ILMN_2631939	BCAT1	1.03563	0.203081	0.998485	-1.02144	0.427777	0.911359	-1.01537	0.437758	0.998969	1.00262	0.880882	0.985741	-0.360791	0.305729	-0.11958	0.742128	-0.551726	0.123553
0huWTctSbXZ9UiHQiA	ILMN_2794608	BCAT2	-1.01319	0.709695	0.998485	-1.0018	0.929312	0.993023	1.03348	0.112473	0.998969	1.01015	0.6046	0.928639	0.536691	0.109714	0.0347058	0.924172	0.0540859	0.882033
3jrX2OO9Y4Zf5oe46w	ILMN_2759920	BCCIP	-1.03213	0.500697	0.998485	1.02153	0.46635	0.914237	1.01163	0.696045	0.998969	1.02186	0.423577	0.869829	0.302016	0.396375	-0.593122	0.0707089	-0.469939	0.170533
ZUYh0pDVYNtBAIhGhI	ILMN_2736925	BCDIN3D	-1.04872	0.021779	0.998485	1.0035	0.866504	0.981351	NA	NA	NA	1.00969	0.633932	0.935148	0.467295	0.173281	-0.581842	0.0776386	NA	NA
rpx9HV9F7xLl.yq6go	ILMN_2727329	BCKDHA	1.02216	0.566356	0.998485	-1.00213	0.965474	0.995363	1.0474	0.11753	0.998969	1.01746	0.438243	0.874441	-0.210681	0.559053	-0.215699	0.549505	0.404897	0.245767
xbqa43wh79OHMDFq64	ILMN_2660803	BCKDHB	-1.04821	0.292527	0.998485	-1.07324	0.200328	0.875854	1.02672	0.690997	0.998969	-1.01306	0.786716	0.969052	0.147208	0.684871	-0.360018	0.306843	-0.251938	0.482555
3RchHVxDtUjutNFNlA	ILMN_2648746	BCKDK	1.10284	0.0136883	0.972566	1.01226	0.683899	0.957087	-1.03081	0.430813	0.998969	-1.08007	0.0403777	0.497026	-0.0975522	0.788624	-0.422957	0.223288	0.0634608	0.861737
05Kk_kaO3Fxp1lE_Os	ILMN_1249301	BCKDK	-1.01008	0.719952	0.998485	-1.00161	0.962712	0.994812	1.02584	0.442028	0.998969	-1.05651	0.0484546	0.51282	0.456735	0.184522	-0.167346	0.644011	-0.100026	0.783369
fYiZ4TuCTriSYqB4Sg	ILMN_2660851	BCL10	1.02196	0.501495	0.998485	-1.03874	0.240521	0.883779	1.01228	0.572186	0.998969	1.03275	0.232304	0.756255	0.0293888	0.935767	0.272598	0.446063	0.217374	0.546333
ZmG1BX.gFJQXDxWx7o	ILMN_2712044	BCL11A	1.05001	0.382805	0.998485	1.34753	0.0780683	0.865421	-1.02243	0.661891	0.998969	1.01326	0.726163	0.957615	-0.234167	0.544222	0.519466	0.123845	0.170152	0.638383
HmktSXBe7eYLXOgF4o	ILMN_2611022	BCL11B	1.03183	0.750856	0.998485	1.52193	0.0557856	0.865421	-1.00389	0.952175	0.998969	1.01874	0.710764	0.954815	-0.612109	0.0599785	0.305872	0.390068	-0.54749	0.101396
BqSf8K_Mf8punjlzJE	ILMN_1249021	BCL2	-1.05887	0.11661	0.998485	1.00759	0.795267	0.973867	-1.0099	0.773539	0.998969	1.01139	0.614155	0.929414	-0.501103	0.140098	-0.552372	0.123023	-0.501227	0.139983
NOLep.jdClCOZK_q7g	ILMN_2682162	BCL2	-1.06769	0.00182823	0.715073	NA	NA	NA	NA	NA	NA	NA	NA	NA	0.434938	0.209047	NA	NA	NA	NA
3e5HuTd1KTggBSsipI	ILMN_1249366	BCL2	1.01101	0.757332	0.998485	1.03815	0.188139	0.875854	-1.00453	0.861258	0.998969	-1.01618	0.501389	0.899728	-0.269197	0.451982	0.129453	0.721519	-0.51135	0.130876
KpLV8l_lKg89DWcyE0	ILMN_2706514	BCL2	1.00797	0.831358	0.998485	-1.01447	0.533249	0.928637	1.00352	0.870152	0.998969	-1.02093	0.321114	0.816207	-0.0069743	0.984744	-0.417178	0.230348	0.212021	0.556496
ouDgd.ajosB6rZNul8	ILMN_2742557	BCL2L1	1.07068	0.0839947	0.998485	-1.00285	0.909848	0.989241	1.03066	0.248748	0.998969	1.00851	0.704791	0.95358	0.366028	0.298239	-0.0302526	0.933883	0.146625	0.686065
01Xgohyfl_v_O7ul0g	ILMN_2698430	BCL2L1	1.05502	0.0783392	0.998485	-1.00246	0.932643	0.993583	-1.03535	0.351287	0.998969	-1.01187	0.617403	0.930421	-0.263459	0.493369	0.311205	0.381428	-0.150104	0.678947
H5C_jpRc3g4UXIl_jU	ILMN_2647885	BCL2L1	1.0645	0.0319739	0.998485	1.02796	0.179349	0.875762	1.01725	0.507007	0.998969	-1.02045	0.350819	0.833567	0.0139109	0.971665	0.229467	0.523647	-0.121159	0.738822
649JeuXu7tTWdJG3k4	ILMN_3157568	BCL2L11	-1.01113	0.612103	0.998485	1.003	0.909018	0.988936	-1.03024	0.178416	0.998969	1.00445	0.791877	0.969995	0.22598	0.530149	0.529469	0.115509	0.30096	0.39811
0LtNf6fEg0vqUwV89I	ILMN_1241307	BCL2L13	1.03421	0.351281	0.998485	-1.00628	0.847686	0.979908	1.00774	0.794002	0.998969	-1.01241	0.610079	0.929414	-0.0183358	0.959904	0.13677	0.70635	-0.150218	0.678714
l53UCVAqEDKh.nylCk	ILMN_2936517	BCL2L2	1.04176	0.525538	0.998485	-1.0208	0.557857	0.931905	1.01469	0.672683	0.998969	1.00369	0.913035	0.991054	0.0938017	0.796605	0.380745	0.277721	0.0189169	0.958634
lUKQiZC6kdLXkvFLXE	ILMN_2636443	BCL2L2	1.03383	0.366308	0.998485	-1.04375	0.267063	0.887169	-1.01085	0.738946	0.998969	-1.03609	0.0556724	0.534975	-0.384028	0.273251	0.360258	0.306497	-0.0984047	0.786812
9XVE95tOftvMPHWiEo	ILMN_1230353	BCL6	-1.01648	0.77837	0.998485	1.17447	0.00536129	0.819637	-1.02694	0.534048	0.998969	1.08554	0.0276344	0.450011	-0.116595	0.748387	0.635977	0.0480902	0.478299	0.192785
0hrtuv6DvDzZIoXrIo	ILMN_1252601	BCL7A	-1.0045	0.910579	0.998485	1.09095	0.277532	0.891024	1.01311	0.641093	0.998969	-1.0346	0.28535	0.793167	-0.6013	0.0659455	0.420996	0.225669	0.517689	0.125364
K16Vdl16VeXc.Pk960	ILMN_2685390	BCL7B	1.02032	0.560049	0.998485	-1.04701	0.052659	0.865421	1.01531	0.491518	0.998969	1.00604	0.763348	0.964155	0.172311	0.634063	-0.130332	0.73822	0.563507	0.089814
H6HtF_WmmfStb92X1Y	ILMN_1250469	BCL9L	1.07643	0.52183	0.998485	1.03442	0.413299	0.906111	1.02403	0.520957	0.998969	-1.00357	0.924825	0.991652	0.334216	0.345238	0.352291	0.318094	-0.0877213	0.80958
fjpwKHfXS7rsz9BKhU	ILMN_3096361	BCLAF1	-1.0009	0.983243	0.998485	1.03605	0.514594	0.923108	-1.04646	0.10643	0.998969	-1.05436	0.163444	0.693729	-0.306735	0.388664	0.517599	0.125442	-0.434012	0.210129
Zvsv6F4V4VcKHTIVh0	ILMN_2774486	BCO2	-1.01582	0.48573	0.998485	NA	NA	NA	NA	NA	NA	-1.00146	0.935132	0.993628	-0.357485	0.310508	NA	NA	NA	NA
9en3ndIbnQgvgDtdWg	ILMN_1228091	BCOR	-1.03625	0.278627	0.998485	1.02593	0.359012	0.899257	1.01704	0.55273	0.998969	-1.0143	0.515746	0.900776	-0.241991	0.500569	0.110278	0.76168	-0.320804	0.399948
NeVQIXoJfQ14CQonvo	ILMN_3096287	BCOR	1.02897	0.295226	0.998485	1.04358	0.101277	0.865421	-1.00292	0.878537	0.998969	1.00019	0.992054	0.998817	0.427145	0.218248	-0.364061	0.301041	0.386619	0.269752
BpFKtX6Hp9xH3hQhQE	ILMN_2755424	BCORL1	-1.0016	0.957288	0.998485	1.00794	0.731588	0.964704	1.0051	0.825194	0.998969	-1.01676	0.465057	0.886882	-0.247056	0.491361	0.0309671	0.932324	0.0948398	0.794394
NqnvRBPg3eK4VFKU40	ILMN_2691345	BCS1L	-1.02513	0.512191	0.998485	1.01053	0.771414	0.971292	1.00615	0.849534	0.998969	1.01398	0.551362	0.910252	0.394179	0.259682	0.0823312	0.821116	-0.116193	0.749232
fmSurpXAXSpQzrn3Nw	ILMN_1231553	BDH1	-1.11138	0.160203	0.998485	-1.0074	0.859132	0.980906	-1.05409	0.266539	0.998969	1.00219	0.929097	0.991937	0.00660588	0.98555	-0.128092	0.724352	0.347375	0.325364
3ViLuHfwy3dt33gnus	ILMN_2641678	BDH2	-1.00577	0.854511	0.998485	-1.12359	0.233721	0.883779	-1.0481	0.0403944	0.998969	1.0127	0.53507	0.905487	-0.14693	0.68544	-0.319031	0.368917	-0.0508977	0.896536
6fnut376SA7.OTpJKU	ILMN_3105417	BDNF	1.05924	0.234662	0.998485	1.01051	0.89562	0.985277	1.00109	0.980983	0.998969	1.00424	0.889123	0.986886	0.439359	0.203929	-0.12293	0.735117	0.0736695	0.83972
rpoiPoUooJ0sUmosy4	ILMN_3018758	BECN1	1.08002	0.169312	0.998485	1.0636	0.0512995	0.865421	1.07065	0.0432123	0.998969	1.01145	0.571078	0.91543	-0.353844	0.315816	-0.385674	0.271025	-0.282925	0.460706
feh7uSS9AgiugAoiHY	ILMN_3090581	BECN1	1.04708	0.272289	0.998485	1.00665	0.88921	0.984284	1.04219	0.574755	0.998969	1.00575	0.822985	0.977831	-0.0701156	0.847374	0.0654139	0.857518	0.00932536	0.979603
6J_oKKP8C5LkqhUqHE	ILMN_2764344	BEND6	-1.00824	0.879968	0.998485	-1.17976	0.0503473	0.865421	1.04616	0.324228	0.998969	-1.00478	0.906892	0.989293	-0.509766	0.132276	0.0844964	0.816478	0.221997	0.537614
lSIJ6tJf6qK_TjqIic	ILMN_2833495	BET1	-1.06486	0.0548506	0.998485	-1.04506	0.202	0.875854	1.02576	0.284813	0.998969	-1.03275	0.170735	0.702827	0.636032	0.0480646	-0.611423	0.0603462	-0.338136	0.339255
iqJ.4X7HgX5XFexJS0	ILMN_2639819	BET1L	1.08921	0.0660279	0.998485	-1.02621	0.484321	0.916971	-1.01077	0.773607	0.998969	-1.04382	0.182747	0.71364	0.65366	0.0403754	-0.314311	0.376438	-0.25091	0.484403
B1j7pXl.YJ6IccblyI	ILMN_3143078	BEX2	-1.04315	0.554331	0.998485	1.03007	0.489325	0.918591	-1.04338	0.205737	0.998969	1.03514	0.146436	0.677541	0.486458	0.15395	0.0611753	0.866679	-0.218858	0.543528
Q6AWItSmkmoPhKKHGU	ILMN_3065164	BEX2	-1.13956	0.164599	0.998485	1.0783	0.11072	0.865421	1.03248	0.601244	0.998969	1.03979	0.140501	0.673598	0.544169	0.10391	-0.313817	0.377229	-0.0742285	0.838517
6VOqdQfeUn3D4B_7.Y	ILMN_1232107	BEX2	-1.06285	0.232838	0.998485	1.03893	0.314583	0.893519	-1.01813	0.521814	0.998969	-1.00481	0.867938	0.984632	0.427561	0.217751	-0.114502	0.752785	-0.592934	0.070821
Zil8Sm.WBVoF4Q08Yc	ILMN_3118584	BEX4	-1.11448	0.204821	0.998485	1.03404	0.46111	0.913064	-1.07158	0.162082	0.998969	1.00785	0.819632	0.977542	0.203541	0.572745	-0.133317	0.732399	-0.304843	0.391746
0ooImiSt4gkgn2aZF4	ILMN_3043587	BEX4	-1.11197	0.257521	0.998485	1.01289	0.796401	0.974332	-1.01286	0.832361	0.998969	1.0265	0.254002	0.771132	0.464952	0.175739	0.0746556	0.848617	-0.30042	0.399
i65EKeyMLoYaCC_13o	ILMN_1236693	BFAR	1.10002	0.00717653	0.93565	-1.00676	0.859896	0.981082	1.01947	0.544298	0.998969	-1.005	0.822853	0.977831	0.158379	0.662106	-0.0475981	0.896115	-0.124406	0.732035
Ku0KfQUrV313h3pFOU	ILMN_2987995	BFAR	1.03857	0.253556	0.998485	1.02202	0.430902	0.912674	1.01842	0.575472	0.998969	-1.0136	0.509033	0.900776	-0.500941	0.140247	0.0471387	0.897113	0.204578	0.570749
N6tXjusorjrS_RUkIo	ILMN_2964042	BGN	-1.08585	0.156455	0.998485	-1.13646	0.0713171	0.865421	-1.14344	0.0284285	0.998969	1.07734	0.0669414	0.566855	-0.563002	0.0901654	0.163053	0.675102	-0.0995445	0.798877
xoj.K.ofrQVfvXoC6U	ILMN_2656915	BHLHA9	-1.03138	0.351829	0.998485	1.00047	0.986933	0.998244	NA	NA	NA	-1.01784	0.387106	0.852597	0.304439	0.392407	-0.195167	0.588966	NA	NA
lu34q8s3nyN766dSIk	ILMN_1251595	BHLHB9	1.00387	0.944934	0.998485	1.08214	0.180486	0.875762	-1.05701	0.160768	0.998969	1.02428	0.573887	0.915882	-0.0542551	0.881666	0.5275	0.117121	-0.462706	0.178115
HoIJz8VAmJ.S.y.k6Y	ILMN_2743082	BHLHE22	-1.00387	0.930005	0.998485	-1.04845	0.343828	0.898965	1.01006	0.899782	0.998969	-1.00229	0.923914	0.991652	-0.247595	0.490385	0.389156	0.266349	0.115594	0.75049
TcqIpivEu.M.6BfXgo	ILMN_1249378	BHLHE40	1.05817	0.357267	0.998485	-1.02038	0.808776	0.976438	-1.00171	0.973956	0.998969	1.11052	0.220074	0.744229	-0.167885	0.642928	-0.657929	0.05407	0.341474	0.334202
B2Us09IT5ibS6Wesms	ILMN_2939138	BICC1	-1.02838	0.254909	0.998485	-1.05243	0.036273	0.865421	1.01151	0.648783	0.998969	1.03912	0.090289	0.604039	-0.255741	0.475742	0.329053	0.353202	0.281925	0.430012
KpQuKIKTKCuIcniH3s	ILMN_2469294	BICD2	-1.02246	0.690707	0.998485	-1.00854	0.814988	0.976557	-1.02136	0.344063	0.998969	-1.03919	0.239788	0.763554	0.420132	0.226724	0.55448	0.0962314	0.404728	0.245984
i1_cLivSrutA_scuio	ILMN_3119245	BICD2	-1.03261	0.494381	0.998485	-1.03642	0.205567	0.878478	-1.00559	0.838769	0.998969	1.06034	0.0986696	0.611465	-0.0768974	0.832778	0.860608	0.00139116	0.141076	0.697465
B7ngf58Ceo20kYllEk	ILMN_3161878	BID	-1.05535	0.196866	0.998485	-1.04214	0.125151	0.865421	1.01459	0.5397	0.998969	-1.01719	0.571828	0.915626	0.491428	0.14916	-0.111556	0.758985	0.0811907	0.823562
KlVS65QpAcSnTfsnQE	ILMN_2701365	BIN1	1.08663	0.0567937	0.998485	-1.01459	0.632854	0.949555	-1.02223	0.48242	0.998969	-1.01177	0.675602	0.945613	-0.164249	0.650243	-0.264104	0.460912	0.212225	0.556107
94Au2oB6qmgFwlCKzE	ILMN_2628339	BIN1	-1.02138	0.488376	0.998485	NA	NA	NA	-1.01211	0.514182	0.998969	-1.00363	0.857521	0.984525	0.11529	0.751128	NA	NA	0.223151	0.535446
BVUCOK6.1AiW1hVvS4	ILMN_2946466	BIN1	1.05315	0.098323	0.998485	-1.05577	0.335451	0.897142	-1.01666	0.617694	0.998969	1.00086	0.971062	0.997506	0.159872	0.659083	0.292685	0.411837	0.302983	0.394788
0Sh7t71IkovqOfns7U	ILMN_2990616	BIRC2	1.02117	0.590966	0.998485	-1.01922	0.529494	0.928216	-1.03472	0.167382	0.998969	1.01303	0.6397	0.935929	-0.272523	0.446193	0.489334	0.151166	-0.000855422	0.998129
fp9zxMqXohKul7.l7o	ILMN_2741621	BIRC2	1.0283	0.332647	0.998485	-1.00255	0.886554	0.983421	-1.02031	0.349399	0.998969	1.02161	0.383882	0.849939	-0.210696	0.559024	0.00680737	0.98511	0.183908	0.611035
ou7kqOzkpAEe7MwwMA	ILMN_1226186	BIRC2	-1.01777	0.557023	0.998485	-1.01298	0.742554	0.967041	-1.00299	0.956727	0.998969	1.02854	0.215182	0.739621	-0.179915	0.618929	0.1552	0.66856	0.112317	0.757383
TRk1Sf9SUqXXJKN8iA	ILMN_2632712	BIRC5	NA	NA	NA	NA	NA	NA	NA	NA	NA	-1.00255	0.894669	0.98725	NA	NA	NA	NA	NA	NA
ZXVFKJ9dPnmRsh7Ec4	ILMN_2705802	BLCAP	1.05043	0.172581	0.998485	1.00707	0.860762	0.981107	-1.0155	0.667834	0.998969	1.02566	0.424027	0.870002	-0.321456	0.365083	0.138759	0.702242	-0.0197083	0.956905
TjVnaXTufdKQTTSUsg	ILMN_3150996	BLM	-1.00006	0.997769	0.999339	-1.01805	0.379065	0.899257	-1.02079	0.28257	0.998969	-1.04696	0.00664724	0.296839	-0.233255	0.516621	0.832666	0.00533616	-0.153699	0.671613
NfdcEvd5kyN_.tJN4U	ILMN_2774640	BLM	-1.03868	0.295313	0.998485	-1.00955	0.710318	0.961393	-1.01261	0.544402	0.998969	-1.00914	0.582681	0.919006	-0.175167	0.628365	-0.212852	0.554914	0.527352	0.117243
Q8qiryco.gd0GeTnl0	ILMN_2646878	BLMH	1.01562	0.673782	0.998485	-1.02521	0.427105	0.911076	-1.00636	0.805687	0.998969	-1.04311	0.252587	0.770419	-0.140975	0.717521	0.113259	0.7554	0.0144223	0.968458
xyNBQlAS9dAkTtl1Kg	ILMN_2726931	BLNK	-1.01433	0.562413	0.998485	NA	NA	NA	1.02227	0.365955	0.998969	-1.04307	0.0452223	0.507922	-0.471006	0.16943	NA	NA	0.308262	0.386185
ioU4rgh3ErUp5Uv5Qk	ILMN_1235757	BLOC1S1	-1.15564	0.175134	0.998485	-1.05043	0.304824	0.891024	-1.03775	0.306102	0.998969	1.03631	0.281985	0.789559	0.528065	0.116657	-0.0245355	0.946361	-0.0663281	0.855544
3D3yl.u0qkmXXrv_Nk	ILMN_2751619	BLOC1S3	1.01424	0.625571	0.998485	1.05888	0.020799	0.865421	-1.02448	0.307974	0.998969	1.02847	0.203046	0.730075	0.375744	0.284605	-0.240233	0.503783	-0.151672	0.675745
3oJ9Ixd4BqlKv63zQQ	ILMN_1257284	BLVRA	-1.07783	0.310094	0.998485	-1.08218	0.233879	0.883779	1.01071	0.722568	0.998969	-1.08436	0.0186833	0.407212	0.180505	0.61776	-0.651669	0.0411994	0.0365459	0.920163
KhepR9Oca5dFFDizho	ILMN_2792868	BLVRB	-1.05091	0.432092	0.998485	-1.007	0.845571	0.979507	1.02454	0.340572	0.998969	1.06987	0.0117003	0.360287	0.487186	0.153243	0.141228	0.697152	0.161281	0.656232
0kElUucFFDfX_Ushdg	ILMN_2645439	BMI1	1.07202	0.12243	0.998485	1.01496	0.522722	0.926338	1.01963	0.305299	0.998969	-1.00422	0.826229	0.977831	-0.50523	0.136338	-0.414398	0.23379	-0.113538	0.754812
KTSURSpFUlDASAu8SU	ILMN_2989955	BMP1	-1.01753	0.854089	0.998485	1.02267	0.718612	0.961735	-1.05826	0.300982	0.998969	1.02668	0.489957	0.895877	-0.382433	0.275417	-0.349766	0.356163	0.245001	0.495088
9n1F5rEQkUL1KER1Ek	ILMN_2713538	BMP1	1.01298	0.596823	0.998485	1.01272	0.709164	0.961393	-1.02134	0.486211	0.998969	1.02406	0.35795	0.839068	0.15192	0.675239	0.189653	0.599738	0.2549	0.477244
up9ReaxEJFC9ShEdRI	ILMN_1218116	BMP1	1.01103	0.80467	0.998485	1.01346	0.755559	0.96795	-1.01283	0.635556	0.998969	1.0368	0.24432	0.764512	0.331579	0.349294	-0.0936894	0.796844	0.348346	0.323921
QsudAtxXBOEth17n7I	ILMN_1235433	BMP3	1.00998	0.70684	0.998485	1.00073	0.987164	0.998244	-1.01187	0.631915	0.998969	1.02048	0.374999	0.846547	-0.258533	0.470768	0.48789	0.152561	-0.0839204	0.817712
Wpe_7VR4Hi5T9TvsXo	ILMN_1215252	BMP4	1.01865	0.542088	0.998485	NA	NA	NA	1.00898	0.77536	0.998969	1.05498	0.00840522	0.329187	-0.0172297	0.962321	NA	NA	0.201539	0.576608
iUgqznk.z7hqg73.Uc	ILMN_2682493	BMP5	-1.00018	0.994524	0.999144	NA	NA	NA	NA	NA	NA	NA	NA	NA	-0.33271	0.347552	NA	NA	NA	NA
oJ44mV.X3pG4aEI1xQ	ILMN_2589662	BMP7	-1.02913	0.310464	0.998485	NA	NA	NA	NA	NA	NA	1.03658	0.0529365	0.529638	0.126422	0.727831	NA	NA	NA	NA
NU_LpyqU3G.7RzdOuw	ILMN_3008361	BMPER	-1.00475	0.854469	0.998485	-1.00635	0.842432	0.979383	-1.00136	0.961223	0.998969	1.00182	0.938178	0.993628	0.324592	0.394087	-0.227341	0.527606	0.440885	0.202179
uf8r7ne9.X9LoPPwnc	ILMN_1251119	BMPR1A	-1.0297	0.395238	0.998485	1.03763	0.450009	0.913041	-1.03803	0.393613	0.998969	1.01018	0.751525	0.961586	-0.720132	0.028668	0.130051	0.720276	-0.329601	0.386397
9nDtIO_pUw1JdSHRJ8	ILMN_2653312	BMPR1A	NA	NA	NA	NA	NA	NA	1.01996	0.394216	0.998969	-1.00813	0.646415	0.937426	NA	NA	NA	NA	-0.177017	0.624682
Q.QBCHT_73NqgUuXzo	ILMN_2812900	BMPR1B	-1.02128	0.706487	0.998485	1.09044	0.0133345	0.865421	-1.0566	0.196453	0.998969	1.02304	0.387473	0.852644	0.0183131	0.959953	0.513911	0.128632	-0.225692	0.530687
3rrxFN0gHVLVMCLoCg	ILMN_1216262	BMPR1B	-1.03585	0.427474	0.998485	1.04605	0.162591	0.869529	1.00673	0.821862	0.998969	-1.04133	0.206076	0.733731	-0.131231	0.717824	0.65407	0.0402071	-0.142412	0.694715
uiggnfWjkq0goAGC0g	ILMN_2716358	BMS1	-1.01474	0.631089	0.998485	1.02098	0.355871	0.899208	-1.00808	0.61956	0.998969	NA	NA	NA	-0.0524225	0.88564	0.499479	0.170988	0.288717	0.418496
WKzqfjooOO0OianuIk	ILMN_2857993	BMX	-1.0176	0.524485	0.998485	-1.01971	0.443841	0.913041	-1.01888	0.343285	0.998969	1.02808	0.261261	0.774312	0.0348981	0.923753	-0.477491	0.162825	-0.134106	0.711863
9qNJKOO0SSuQSJiinM	ILMN_2648648	BNIP1	1.02638	0.485228	0.998485	1.01847	0.430211	0.912674	-1.0306	0.309473	0.998969	1.02566	0.395044	0.855186	0.103501	0.776001	0.454513	0.18694	-0.0706816	0.846154
3bfwfpYnpIn71Tos7Y	ILMN_3163063	BNIP2	1.05758	0.075608	0.998485	1.04705	0.0721213	0.865421	-1.03417	0.176986	0.998969	1.03477	0.173232	0.705012	0.096332	0.791218	0.0166012	0.963695	0.103099	0.776853
lHdGuCSe_gdes8OiUg	ILMN_2716567	BNIP3L	1.03385	0.462466	0.998485	-1.04239	0.314382	0.893519	-1.03934	0.103576	0.998969	1.00773	0.822416	0.977831	-0.425903	0.219737	0.391293	0.263501	-0.632109	0.0498996
03IWWiGkmJq14BSB1E	ILMN_1237404	BOK	1.08898	0.0306296	0.998485	-1.0099	0.827254	0.977477	1.00582	0.843945	0.998969	1.0118	0.658552	0.939451	0.0928805	0.798568	0.310156	0.38312	-0.348232	0.32409
Tncpy9F4UOBCI17o4o	ILMN_2772077	BOK	1.01692	0.801138	0.998485	1.01714	0.740193	0.966315	1.00534	0.900736	0.998969	-1.00647	0.866622	0.984632	-0.417972	0.22937	0.0160483	0.964903	-0.0471231	0.897147
ixOV6U1KYIVWVLoiAE	ILMN_2640140	BOLA1	-1.04502	0.435617	0.998485	1.00351	0.920314	0.991608	1.0227	0.188379	0.998969	1.00143	0.949452	0.995822	0.428473	0.216665	-0.488351	0.152115	-0.0845438	0.816377
l9Yteuu2nC9ioCUedQ	ILMN_2846368	BOLA2	-1.20701	0.138794	0.998485	1.02591	0.626329	0.947639	1.03038	0.454601	0.998969	1.01033	0.75218	0.961586	0.396047	0.257226	-0.375399	0.285084	0.200965	0.577718
riUSc9C0SE3SinmqU4	ILMN_2990197	BOLA3	-1.15148	0.184394	0.998485	-1.06152	0.286729	0.891024	-1.01677	0.665935	0.998969	1.03794	0.177181	0.709469	0.364932	0.299799	-0.517496	0.12553	-0.0185231	0.959495
rp8JSCoK6z4xDtFR4o	ILMN_1253942	BOP1	1.01076	0.85968	0.998485	-1.00333	0.944812	0.994451	1.01345	0.72204	0.998969	1.00509	0.871875	0.985484	-0.188867	0.601278	-0.296917	0.404789	0.442976	0.199795
WUUjVMkFJ60SHk.WU4	ILMN_2601507	BPNT1	1.04012	0.370289	0.998485	-1.03604	0.322381	0.895167	1.02466	0.375598	0.998969	-1.04857	0.123431	0.649797	-0.00279079	0.993895	0.194943	0.589401	-0.0868824	0.811373
3I1TJBSetEh5P1lOBU	ILMN_2601515	BPNT1	1.03273	0.18495	0.998485	1.00858	0.714015	0.961735	-1.02142	0.459846	0.998969	-1.02385	0.446879	0.880272	-0.326663	0.356918	0.0416673	0.915239	0.0581865	0.873147
Zy5KjwqflUURenQO8c	ILMN_3149112	BPNT1	-1.03145	0.356209	0.998485	-1.00705	0.822806	0.977477	1.02031	0.581817	0.998969	1.0127	0.565101	0.914342	0.134901	0.710216	-0.32099	0.365819	-0.288158	0.41944
Kq3nqF.niaC7qVwwsY	ILMN_2596880	BRAP	1.02078	0.456893	0.998485	1.00938	0.630862	0.949166	1.01641	0.432196	0.998969	1.00242	0.928171	0.991937	-0.365317	0.29925	0.17743	0.623861	0.201281	0.577106
EphJLiA8nvi3yXVr_w	ILMN_2634750	BRCA2	-1.01473	0.581252	0.998485	NA	NA	NA	NA	NA	NA	1.01905	0.374239	0.846496	-0.305317	0.390973	NA	NA	NA	NA
6X4N5LInlADXu0oIEo	ILMN_2636303	BRCC3	-1.03204	0.283451	0.998485	-1.04038	0.0896221	0.865421	1.02839	0.325603	0.998969	-1.02082	0.244754	0.764556	-0.370185	0.292364	-0.16502	0.64869	0.237973	0.507926
NRycOJRF6RQrHofQMs	ILMN_1246488	BRCC3	-1.03123	0.187731	0.998485	-1.00075	0.981476	0.997581	1.0139	0.499108	0.998969	1.01733	0.422553	0.869399	0.125872	0.746936	0.195221	0.588861	-0.00591091	0.98707
6l_DeSyJ5QA17tKCBI	ILMN_1222806	BRCC3	-1.02295	0.517504	0.998485	-1.07327	0.0535033	0.865421	-1.01907	0.563447	0.998969	-1.00047	0.981851	0.998221	0.066641	0.854868	-0.198328	0.582824	0.0145062	0.968274
uPwnO6wp6q7slutdXU	ILMN_3154409	BRD2	1.02254	0.76855	0.998485	1.04418	0.222367	0.883779	1.0469	0.224464	0.998969	1.00262	0.934271	0.993628	0.577986	0.0801051	0.286683	0.42193	0.655354	0.0396835
9BB6eV7VKlQzcJUJoI	ILMN_2734848	BRD2	-1.00105	0.987349	0.998485	1.00821	0.931711	0.993445	-1.02746	0.461909	0.998969	-1.03977	0.191659	0.722032	-0.565283	0.0885843	0.344847	0.329135	0.282723	0.428653
W6TAlV4nsnte9H3CpU	ILMN_2751505	BRD2	1.02539	0.573367	0.998485	1.05837	0.23562	0.883779	1.01062	0.821354	0.998969	-1.02567	0.359631	0.839479	0.409399	0.24005	0.459405	0.18164	-0.112563	0.756865
0VeuK8TuU4gVHcRTLk	ILMN_2633333	BRD4	-1.00411	0.927593	0.998485	1.02464	0.568432	0.934588	-1.03908	0.15924	0.998969	1.01945	0.515315	0.900776	-0.352873	0.35161	0.546322	0.102276	-0.250926	0.484374
fE5RVdIobS9KkbdDOI	ILMN_2601877	BRD4	1.0211	0.335584	0.998485	NA	NA	NA	NA	NA	NA	-1.02019	0.309503	0.805783	-0.538896	0.107982	NA	NA	NA	NA
rpIDTqd7w5XDuwckj4	ILMN_1216763	BRD8	1.00063	0.982824	0.998485	NA	NA	NA	NA	NA	NA	NA	NA	NA	-0.0495259	0.891927	NA	NA	NA	NA
oir1979c.qR4lIo6L4	ILMN_1216614	BRD9	-1.01877	0.808733	0.998485	-1.03671	0.485513	0.917575	-1.05048	0.164982	0.998969	1.00291	0.938512	0.993628	-0.495198	0.145587	0.33487	0.344237	0.144131	0.691181
T3u3XiRSSUJe9OOO5E	ILMN_2913089	BRD9	1.01188	0.780424	0.998485	-1.02905	0.579555	0.938067	1.01225	0.704679	0.998969	-1.04982	0.175801	0.708759	-0.414041	0.234233	0.127424	0.725741	0.0792261	0.827777
xW2gnQhsJCd6fdAhaA	ILMN_2705747	BRDT	1.02213	0.579231	0.998485	1.05409	0.0205581	0.865421	1.00128	0.960805	0.998969	1.01611	0.513483	0.900776	0.55231	0.0978162	-0.0615173	0.865939	-0.740947	0.0142148
65Q6AncoBFLniKaUFI	ILMN_3139800	BRE	-1.00087	0.98526	0.998485	1.05146	0.0726278	0.865421	1.03509	0.0819637	0.998969	1.03501	0.301053	0.800909	0.691164	0.0268647	-0.308456	0.385869	0.38945	0.265956
ZABxUxJVI6joDgOlCI	ILMN_2763182	BRE	1.02095	0.612729	0.998485	-1.01313	0.695908	0.957376	-1.02486	0.388005	0.998969	1.00386	0.901895	0.989293	0.427496	0.217829	0.259074	0.469806	0.0412957	0.909819
fnodQuze.zq7SOpXqk	ILMN_1220096	BRF1	1.00831	0.834999	0.998485	-1.02741	0.35332	0.899208	1.0094	0.648158	0.998969	1.00032	0.989542	0.998817	-0.303722	0.393578	-0.323377	0.36206	-0.0641296	0.860292
KklObtXBXV45G9.Cu0	ILMN_1258583	BRF2	-1.0058	0.902803	0.998485	1.01119	0.758143	0.968982	-1.00682	0.757997	0.998969	1.00687	0.778635	0.967765	-0.316703	0.372618	-0.1226	0.735806	-0.349525	0.322174
QGSK6CkmF5VQpwqwbk	ILMN_2700334	BRI3	-1.0976	0.171749	0.998485	1.02183	0.64106	0.94966	1.01677	0.603639	0.998969	1.06625	0.0329521	0.477089	0.321946	0.364312	-0.535432	0.110711	0.351068	0.354252
NSxlGMU1Qi0lv7oUbs	ILMN_2668001	BRIX1	-1.03656	0.306181	0.998485	1.00808	0.836473	0.978229	1.0531	0.0792751	0.998969	1.01617	0.618378	0.930567	0.259746	0.468614	-0.460918	0.180019	0.432202	0.212252
rUt1ATk2m7TCNTRJ5Q	ILMN_2853744	BRIX1	-1.0519	0.25331	0.998485	-1.03769	0.433556	0.913041	1.0087	0.752356	0.998969	1.04988	0.202938	0.730075	0.461194	0.179725	-0.689626	0.027347	0.37605	0.318549
liKGn1Sn90qc9eu3l0	ILMN_2743551	BRMS1	-1.02563	0.644232	0.998485	1.08892	0.121247	0.865421	1.0026	0.939518	0.998969	-1.02391	0.283536	0.790248	0.265989	0.457597	-0.453972	0.187531	0.0339865	0.92574
TpTvRuNk4kt__PsCcE	ILMN_2637698	BROX	1.02079	0.636616	0.998485	1.02441	0.637992	0.949555	1.0371	0.18072	0.998969	-1.01291	0.63392	0.935148	-0.53634	0.109991	0.600887	0.0661806	-0.55317	0.0971863
uUt7fxP5dCqH5_6OkU	ILMN_2895991	BRP44	-1.00987	0.779945	0.998485	-1.01985	0.546751	0.931317	-1.00079	0.970168	0.998969	1.00541	0.841344	0.982763	0.239996	0.504216	-0.0545604	0.881004	-0.242331	0.499948
lzFAA_i.vZ7w.f7qtI	ILMN_1237846	BRP44	-1.05748	0.402096	0.998485	-1.06999	0.349643	0.898965	1.01155	0.935939	0.998969	1.0198	0.622794	0.932416	-0.115716	0.750234	-0.0646978	0.859064	0.00655652	0.985658
KEpXFFfFx05SqD0xeU	ILMN_2800859	BRPF1	-1.00245	0.946089	0.998485	1.01598	0.720752	0.962562	-1.0455	0.0526402	0.998969	-1.00501	0.823129	0.977831	0.0811608	0.823626	0.162807	0.653151	0.337233	0.340629
HSXJbqPjt7cl6CKpHI	ILMN_2800861	BRPF1	-1.01102	0.677849	0.998485	1.02604	0.507679	0.920144	-1.03581	0.349716	0.998969	-1.00754	0.793392	0.970205	0.425142	0.22065	-0.219328	0.542641	0.370122	0.292452
oCXklVFKWd4V43iyd0	ILMN_3104328	BRSK1	1.01737	0.701132	0.998485	-1.01559	0.636752	0.949555	1.01708	0.436824	0.998969	-1.0265	0.333965	0.826154	0.228393	0.525646	0.45182	0.189896	-0.0900053	0.804701
BSQJRksQuoKpM3Gu0o	ILMN_3048950	BRSK2	1.05135	0.477892	0.998485	1.03559	0.453473	0.913041	1.05763	0.367065	0.998969	-1.11634	0.0282363	0.450011	0.276922	0.438588	0.464485	0.176232	0.413921	0.234383
xRwQlC7aot6XetvucQ	ILMN_2834573	BRWD1	1.04165	0.380042	0.998485	1.02791	0.489327	0.918591	-1.03158	0.355223	0.998969	1.00699	0.791796	0.969995	-0.630971	0.0504403	0.191935	0.595271	0.31936	0.368397
6pd62_5xA7.lxIo7oc	ILMN_2421220	BRWD1	-1.03488	0.347716	0.998485	1.01483	0.679942	0.957087	-1.01701	0.664531	0.998969	-1.01584	0.470143	0.888707	-0.124665	0.7493	0.163044	0.652672	-0.145004	0.689389
oel3rb7nEDv_XEijug	ILMN_1252496	BRWD1	1.00755	0.869773	0.998485	-1.02435	0.551045	0.931317	-1.00798	0.746735	0.998969	1.00709	0.84684	0.98412	0.100751	0.781832	0.29564	0.40691	0.382247	0.275671
cUvXgQKuD10T1Jn9U0	ILMN_1221719	BSCL2	1.00591	0.90126	0.998485	-1.05326	0.2434	0.883779	1.00026	0.993273	0.999288	1.03067	0.342044	0.829891	-0.386615	0.269756	-0.204665	0.570582	-0.14974	0.67969
Nqk1FLh0.Aqn60q_e4	ILMN_1234100	BSDC1	1.03748	0.323083	0.998485	1.00322	0.935914	0.994016	-1.03362	0.304077	0.998969	1.00673	0.798321	0.971728	0.0956672	0.792633	0.00678208	0.985165	0.252003	0.482437
3RyqnUj6t9dZIH8oeo	ILMN_1224110	BST2	-1.00271	0.930081	0.998485	NA	NA	NA	NA	NA	NA	NA	NA	NA	-0.192442	0.59428	NA	NA	NA	NA
cqB7.S3nesc43zq3CU	ILMN_1257078	BTBD1	1.08981	0.243525	0.998485	1.10918	0.141629	0.865421	-1.03005	0.439148	0.998969	-1.00263	0.939166	0.993628	-0.236108	0.511355	0.715644	0.019953	-0.0488824	0.893325
rJ6rH8Lsj4z835dKwg	ILMN_1236572	BTBD10	-1.08275	0.0779435	0.998485	1.04089	0.587399	0.939333	1.02547	0.777809	0.998969	-1.05255	0.198203	0.72926	0.212923	0.582292	0.124028	0.732825	0.0135749	0.97031
6IuER7Z_X0qOed3BUk	ILMN_3139253	BTBD11	-1.01275	0.852119	0.998485	-1.30629	0.0244353	0.865421	1.00863	0.869302	0.998969	-1.03737	0.109082	0.628916	-0.551804	0.0981887	-0.189293	0.625705	0.160625	0.657558
6iNu5.1C5UUF1x97F0	ILMN_1227043	BTBD3	1.04976	0.458527	0.998485	1.04559	0.273714	0.890909	-1.06764	0.0247799	0.998969	1.05424	0.124987	0.651721	-0.180767	0.617241	0.482833	0.157502	0.154488	0.670009
oqI27n.ULlRQXXH3sU	ILMN_2599955	BTBD3	1.03273	0.651555	0.998485	1.02987	0.480664	0.915989	-1.03735	0.344101	0.998969	1.0116	0.701269	0.952658	-0.0821198	0.821569	0.445512	0.196926	-0.373083	0.288304
r4fdElbtp4VyEk9RK4	ILMN_2839682	BTBD6	1.08962	0.019575	0.998485	1.02443	0.564581	0.934588	1.0038	0.929634	0.998969	-1.04125	0.0691687	0.571938	-0.373368	0.287907	0.256979	0.473534	0.284338	0.425904
Eg6oRwg84eod6cRuUU	ILMN_2643933	BTBD9	1.06139	0.122879	0.998485	-1.04997	0.0457043	0.865421	1.02709	0.313152	0.998969	-1.02262	0.367865	0.843176	0.621658	0.0550134	-0.634704	0.0663133	-0.160513	0.679945
cf1.P3Rdqjh3oRV4Uk	ILMN_1252698	BTD	1.02367	0.32194	0.998485	-1.02731	0.298786	0.891024	-1.01139	0.601599	0.998969	-1.01534	0.428532	0.870682	0.00921557	0.979843	-0.182183	0.614442	-0.487589	0.152852
ZgOfVJNdBSfrkhJeHI	ILMN_2720034	BTF3	-1.13341	0.120133	0.998485	1.01439	0.7976	0.974337	1.04985	0.255559	0.998969	1.05556	0.0566598	0.539543	0.43055	0.2142	-0.36426	0.300756	-0.0818276	0.822196
Nhfu._m_IsqJhSneU4	ILMN_2866185	BTG1	1.02037	0.856238	0.998485	1.18052	0.0163589	0.865421	-1.20489	0.0237934	0.998969	1.09178	0.233559	0.757768	0.205235	0.569486	-0.0584015	0.872682	-0.278234	0.46849
BgLorev7B.X7HQ_rCI	ILMN_2866189	BTG1	-1.01368	0.900974	0.998485	1.10967	0.214553	0.883043	-1.0905	0.389104	0.998969	1.11109	0.0720658	0.579917	-0.143608	0.692257	0.028191	0.938381	-0.204369	0.571152
QTR69UgCW5Co0rxb7M	ILMN_2705119	BTG1	1.09754	0.345631	0.998485	1.08329	0.188712	0.875854	-1.17405	0.0165327	0.998969	1.05432	0.293731	0.797729	-0.0156233	0.965832	-0.126015	0.728678	-0.942176	0.000144627
lt9XAkAOKcCUIDlVLI	ILMN_1248124	BTG4	-1.004	0.898952	0.998485	1.01656	0.544134	0.931317	-1.01625	0.413436	0.998969	1.01777	0.452007	0.882788	0.0526856	0.892918	0.510976	0.131205	0.0445779	0.902679
TTdSMDBUEel0w_VKPY	ILMN_2690741	BTRC	1.04307	0.24377	0.998485	1.03183	0.319919	0.895167	1.01418	0.761012	0.998969	1.01017	0.644374	0.936851	0.741426	0.0141187	0.415153	0.232852	0.0038609	0.991554
iYp_l5ECn6DJSRSkUc	ILMN_3027079	BTRC	-1.00662	0.772641	0.998485	-1.00116	0.9577	0.994812	1.00335	0.853131	0.998969	-1.03541	0.0622825	0.555698	-0.292829	0.411596	-0.223975	0.533902	-0.342187	0.333128
EXnaRaeXS55zSCO380	ILMN_3100042	BTRC	1.00565	0.916602	0.998485	1.06984	0.199887	0.875854	-1.00426	0.909037	0.998969	-1.04352	0.217135	0.741824	0.669975	0.0340389	-0.324643	0.360075	-0.135411	0.70916
9V7oJ6oIQ0laCf50dI	ILMN_2985969	BUB1B	-1.04027	0.0841232	0.998485	NA	NA	NA	NA	NA	NA	NA	NA	NA	0.258965	0.470001	NA	NA	NA	NA
f7R4JXWhjA67FJSicc	ILMN_2655944	BUB3	1.00875	0.783562	0.998485	-1.03276	0.353048	0.898965	-1.00694	0.841173	0.998969	-1.0049	0.823298	0.977831	0.0707684	0.845967	-0.32896	0.353345	0.238452	0.507046
fe3unp_pKEa4ffzVKs	ILMN_2593532	BUD13	-1.02386	0.622769	0.998485	1.01026	0.811661	0.976557	-1.01977	0.541466	0.998969	1.04498	0.0413823	0.498157	-0.349066	0.322854	-0.436677	0.207025	0.372849	0.288632
0oDlQrQCCWgJF1I6eo	ILMN_2781966	BUD31	-1.18582	0.0372644	0.998485	1.04098	0.369123	0.899257	-1.01801	0.685491	0.998969	1.0741	0.0240708	0.443045	0.560082	0.0922158	-0.441605	0.201356	0.454148	0.187339
EV_3qYt3_Tv99nuuog	ILMN_1229256	BZRAP1	1.0403	0.439162	0.998485	1.11863	0.201109	0.875854	-1.02619	0.444046	0.998969	1.1081	0.0015294	0.18777	-0.321356	0.365241	0.272306	0.446569	0.138288	0.703215
0fy6E_VP_CuU98glCA	ILMN_2729861	BZW1	-1.00017	0.997942	0.999339	1.02197	0.74449	0.967206	-1.03254	0.533179	0.998969	-1.0204	0.636052	0.935148	-0.167357	0.643989	0.588543	0.073471	0.00241182	0.995087
00EKq0rKBeCdAHSxFU	ILMN_2876482	BZW2	-1.05922	0.143037	0.998485	1.10482	0.0187786	0.865421	1.0371	0.420613	0.998969	1.01559	0.618223	0.930567	0.3991	0.25324	-0.545644	0.102789	0.309839	0.383631
uIJEZZQKQibf34Ujgg	ILMN_2644587	BZW2	-1.08723	0.147477	0.998485	1.16927	0.00634057	0.819637	-1.00551	0.882047	0.998969	1.06335	0.0210227	0.425933	-0.105739	0.771266	-0.236185	0.511213	0.223321	0.563539
clyMpNQiFhFUdedKPI	ILMN_2692853	C030006K11RIK	-1.00629	0.819969	0.998485	-1.02302	0.516308	0.924468	1.00132	0.960024	0.998969	1.00011	0.994818	0.998817	0.131765	0.716717	-0.099501	0.784484	-0.0308047	0.932679
BknV3lUwJP5IXO8Pl0	ILMN_2801171	C030030A07RIK	1.00438	0.872528	0.998485	-1.02894	0.546041	0.931317	-1.0199	0.350558	0.998969	1.01301	0.485175	0.895877	-0.377297	0.282457	-0.790306	0.00651095	-0.212204	0.556148
3ugLxUPc4FIrAnlfnA	ILMN_2722290	C030039L03RIK	-1.00083	0.975859	0.998485	1.02336	0.429505	0.912674	-1.00713	0.753214	0.998969	-1.01089	0.713672	0.955244	-0.442667	0.200146	-0.327677	0.355339	0.387735	0.268252
0d7ecMI31Gf0g.g5RU	ILMN_1224551	C030046I01RIK	-1.00123	0.960008	0.998485	NA	NA	NA	NA	NA	NA	NA	NA	NA	-0.605484	0.0635916	NA	NA	NA	NA
Q9xHtJM3sf.fe0mpRI	ILMN_2940358	C030048B08RIK	1.01573	0.735288	0.998485	1.05222	0.157821	0.869529	-1.01168	0.620125	0.998969	-1.05599	0.126888	0.655155	0.141266	0.697074	0.43085	0.213845	0.147403	0.684471
ErNVEsjeShh1_DEGkE	ILMN_1259185	C030048B08RIK	-1.01303	0.723176	0.998485	-1.00801	0.733927	0.965186	-1.00948	0.684386	0.998969	-1.00382	0.863389	0.984632	-0.0835526	0.818499	0.448289	0.193813	-0.274913	0.442053
H3xZ_syqhzfd1OeFSU	ILMN_2803004	C130022K22RIK	-1.02919	0.460629	0.998485	-1.08783	0.038223	0.865421	1.00099	0.975133	0.998969	1.02299	0.443453	0.877526	0.302664	0.395312	0.0129104	0.971763	-0.0352445	0.922998
N1JJKlRFUeQWL8Inyc	ILMN_1219466	C130074G19RIK	1.0144	0.746121	0.998485	-1.03142	0.55214	0.931317	1.0355	0.225627	0.998969	-1.04558	0.138182	0.671252	0.295676	0.40685	-0.160603	0.657604	0.353265	0.316664
iVPgt5_xDtA6Dnv.V8	ILMN_2682271	C1GALT1C1	-1.04337	0.336191	0.998485	-1.04748	0.377967	0.899257	1.02303	0.732169	0.998969	1.02213	0.489652	0.895877	-0.189899	0.599255	0.0448145	0.902165	-0.439176	0.204139
9n0nmGKoYrujYAoVZA	ILMN_2776431	C1QA	-1.0311	0.496215	0.998485	-1.01742	0.572325	0.935687	1.03485	0.272002	0.998969	1.07057	0.0265539	0.449453	0.481824	0.158499	-0.69614	0.0253444	-0.226066	0.529987
x26WY2oSTkgLLRfe4c	ILMN_2619620	C1QB	-1.0359	0.577598	0.998485	1.00712	0.923121	0.992032	1.0523	0.294378	0.998969	1.08679	0.00371841	0.256046	0.445932	0.196455	-0.40456	0.246198	-0.368852	0.29424
KeiPqJ6K4GkaKcDz5k	ILMN_1225373	C1QBP	-1.02426	0.716757	0.998485	-1.05475	0.396574	0.902716	-1.01246	0.668191	0.998969	1.04243	0.16024	0.689989	0.457271	0.183941	0.118277	0.744859	-0.0658367	0.856605
cE2TGlBe5uReBdBflI	ILMN_2715840	C1QC	-1.08501	0.239927	0.998485	1.00576	0.905766	0.9873	1.03082	0.352417	0.998969	1.04897	0.208399	0.73431	0.422548	0.223784	-0.577985	0.0801057	-0.596363	0.0687952
KUEBIC9F_05Ed1M110	ILMN_2671473	C1QL2	-1.02179	0.364027	0.998485	-1.2983	0.160799	0.869529	NA	NA	NA	1.00068	0.967256	0.997506	-0.350589	0.320602	0.0522264	0.893847	NA	NA
050I540g8Yc5SwS7rU	ILMN_2612990	C1QL3	1.0201	0.798882	0.998485	1.03602	0.567509	0.934588	1.04203	0.366166	0.998969	1.02219	0.546347	0.907926	0.0770681	0.832411	0.173626	0.631437	0.384655	0.272402
lHSJIOl33GFfHoWEl4	ILMN_1232458	C1QTNF2	NA	NA	NA	NA	NA	NA	NA	NA	NA	1.02027	0.232722	0.756756	NA	NA	NA	NA	NA	NA
9CeWZCGe2uCeOCBZhg	ILMN_1252584	C1QTNF4	-1.01754	0.778433	0.998485	1.21945	0.0502626	0.865421	-1.02667	0.424188	0.998969	1.11526	0.000257679	0.095332	0.639692	0.0463942	0.0432215	0.905629	0.212788	0.555036
cUo_5ahd7lF7gkLd3c	ILMN_2612895	C2	NA	NA	NA	NA	NA	NA	-1.06607	0.0460166	0.998969	1.0243	0.29227	0.797377	NA	NA	NA	NA	0.356071	0.312564
HkDURffRUlwmEklWSc	ILMN_1216046	C230052I12RIK	NA	NA	NA	-1.00648	0.757632	0.968697	NA	NA	NA	-1.03155	0.0806715	0.590477	NA	NA	-0.364349	0.300629	NA	NA
oaeR3Ouz5AcXqynS3I	ILMN_1223511	C230071H18RIK	-1.04385	0.286983	0.998485	NA	NA	NA	NA	NA	NA	-1.00037	0.983957	0.998221	-0.394953	0.258663	NA	NA	NA	NA
HfFpSAC6cOtqC4XF.0	ILMN_3158659	C230096C10RIK	1.04209	0.223436	0.998485	-1.02486	0.455714	0.913041	1.00551	0.824925	0.998969	1.00847	0.727061	0.957615	0.102662	0.777778	-0.196606	0.586167	0.457134	0.184089
3iu1d6nvnOJKOpxdFw	ILMN_2944272	C2CD2	-1.02114	0.374704	0.998485	-1.01779	0.479459	0.915989	-1.01264	0.483909	0.998969	1.0135	0.466369	0.887985	0.215101	0.55064	-0.0048911	0.989301	0.541957	0.105606
HeeFIlRfefAyhKc._U	ILMN_2627713	C2CD3	1.0033	0.920139	0.998485	1.04642	0.216731	0.883043	-1.01554	0.435351	0.998969	-1.00904	0.664971	0.941149	0.0235981	0.948408	0.245553	0.524222	0.584244	0.076128
Qd7_S_Hsbg3.CGXVUA	ILMN_2615081	C2CD4C	-1.00974	0.869194	0.998485	-1.04909	0.466617	0.914237	1.03678	0.385332	0.998969	-1.02105	0.57595	0.915882	-0.161309	0.656176	0.0752039	0.836419	0.514885	0.127784
3erryF.n6WjjsUcIWo	ILMN_2938973	C330005M16RIK	-1.01685	0.560212	0.998485	1.01298	0.576584	0.936451	NA	NA	NA	NA	NA	NA	-0.382587	0.275208	-0.269452	0.451536	NA	NA
Q1dE9eTrR9TRtNSN.E	ILMN_1256807	C330019G07RIK	1.02284	0.378032	0.998485	1.02251	0.377457	0.899257	1.0091	0.690091	0.998969	-1.00837	0.666242	0.941629	0.372737	0.288788	-0.154534	0.669915	0.193031	0.593129
oiAgiSIAgtSJS8khYg	ILMN_2647961	C330027C09RIK	NA	NA	NA	1.00536	0.805622	0.975961	NA	NA	NA	NA	NA	NA	NA	NA	-0.218784	0.543668	NA	NA
K9eOi9JJaq5Su4pfKE	ILMN_3049559	C4B	-1.01985	0.740281	0.998485	-1.04115	0.49958	0.919326	-1.01421	0.72628	0.998969	1.08733	0.0062079	0.284623	-0.240629	0.503059	-0.386745	0.269582	-0.332239	0.348277
rdu_XO15VfxPd7lTdI	ILMN_2642091	C530028O21RIK	1.03501	0.254433	0.998485	1.01473	0.629773	0.948554	1.02647	0.324832	0.998969	1.01067	0.575149	0.915882	-0.138781	0.702197	0.350715	0.320416	0.251937	0.482556
0nLggp6KeGfuCShbos	ILMN_3132223	C630004H02RIK	1.01849	0.723461	0.998485	-1.01764	0.744565	0.967206	-1.01933	0.684437	0.998969	-1.08612	0.00514549	0.280554	0.411459	0.237459	-0.0271334	0.940689	-0.255566	0.476055
3N46otSUBOiIkGiPtQ	ILMN_3055445	C630004H02RIK	1.0595	0.0464408	0.998485	-1.01868	0.487171	0.918054	1.00402	0.827082	0.998969	-1.00927	0.737606	0.959572	0.0924506	0.799484	-0.137996	0.703817	-0.133051	0.714049
WqtI47UgV4NUdwoMGE	ILMN_3162465	C78339	-1.02129	0.585815	0.998485	1.0464	0.203361	0.875854	1.01197	0.567724	0.998969	1.0081	0.776916	0.967214	-0.28572	0.42356	0.116999	0.747539	-0.210962	0.558517
len28Pe4ce3D6Xyjko	ILMN_2708150	C80913	1.01707	0.747421	0.998485	1.0126	0.781422	0.972677	1.04446	0.224503	0.998969	-1.03832	0.157854	0.688434	-0.490809	0.149752	0.714448	0.0202584	-0.114666	0.75244
cvEu1eihRF.njtuaes	ILMN_3074279	C85492	1.12286	0.00226029	0.743719	-1.03631	0.489446	0.918591	1.03539	0.186118	0.998969	1.00632	0.821561	0.977819	-0.124237	0.732389	-0.293803	0.409969	-0.0345357	0.924543
o4sp_Rwl59WLuf.kj8	ILMN_2721748	C85492	1.05309	0.194152	0.998485	-1.03973	0.451523	0.913041	1.02164	0.562454	0.998969	1.03635	0.230579	0.755297	-0.270772	0.449237	0.227995	0.526387	-0.138306	0.703178
K15.pfrsrXpdiAS60Y	ILMN_3153225	C85492	1.02751	0.565524	0.998485	-1.0906	0.156602	0.869529	1.01358	0.690499	0.998969	-1.01363	0.663236	0.940675	-0.538247	0.10849	-0.28408	0.426343	0.477904	0.16241
WJfu7Et9MQtqR8.eFI	ILMN_2882473	C87436	1.02309	0.63688	0.998485	-1.01269	0.630952	0.949166	-1.01969	0.398246	0.998969	-1.01293	0.639264	0.935929	-0.524852	0.119312	0.462178	0.178676	-0.00329396	0.992795
3sn81IFqOgfGJ78DlU	ILMN_1229035	C87436	1.02983	0.352072	0.998485	-1.0055	0.837218	0.978261	-1.0224	0.449255	0.998969	-1.01691	0.466538	0.888147	-0.348533	0.323644	0.101602	0.780026	-0.309233	0.384611
HERI41YuB1BXREfJSk	ILMN_1227404	C8B	-1.0623	0.153774	0.998485	1.0173	0.539111	0.930763	1.03125	0.448992	0.998969	-1.00447	0.906679	0.989293	0.243901	0.497088	-0.0610679	0.866911	-0.180768	0.617241
xqcV0iL3iTXg5Hfot0	ILMN_2637180	C8G	-1.04065	0.12171	0.998485	1.01792	0.460731	0.913064	1.01475	0.44128	0.998969	1.00704	0.754858	0.962071	-0.0172779	0.964811	-0.329421	0.35263	-0.399379	0.252878
lq.g_nf5STX.Ncnux8	ILMN_1217943	CAB39L	-1.03359	0.31708	0.998485	-1.12874	0.00519246	0.819637	1.02929	0.410002	0.998969	-1.00206	0.945051	0.994648	0.395949	0.291468	0.695588	0.0255101	0.428665	0.216436
BgL.w.6pIkZfhdiGdU	ILMN_1220084	CABLES2	1.02239	0.407397	0.998485	-1.01813	0.402505	0.904994	NA	NA	NA	-1.03834	0.0634753	0.559193	-0.493898	0.146813	-0.274399	0.442943	NA	NA
WiI90l9FenvO5juvd4	ILMN_1248895	CACHD1	1.00909	0.811104	0.998485	-1.0754	0.209025	0.880091	-1.00715	0.689702	0.998969	1.04479	0.0300423	0.457255	-0.327857	0.355059	0.295635	0.406918	-0.461548	0.179346
Qok5SqEvjKK9iEK5Eo	ILMN_2485920	CACNA1A	-1.10565	0.0109468	0.972566	1.05328	0.0329812	0.865421	-1.0022	0.899902	0.998969	1.00491	0.872838	0.985484	0.0126218	0.972394	-0.062579	0.863643	0.234548	0.514232
B3gRDledSAiVeJSXck	ILMN_3107273	CACNA1B	1.00823	0.712945	0.998485	NA	NA	NA	NA	NA	NA	-1.01009	0.579379	0.917053	0.203324	0.573164	NA	NA	NA	NA
9UVY0oUeucnkUYUVOw	ILMN_2770304	CACNA1B	1.00034	0.989875	0.998639	NA	NA	NA	NA	NA	NA	NA	NA	NA	0.101555	0.780125	NA	NA	NA	NA
xj5Y5e4XBTIYjoC55Q	ILMN_2663841	CACNA1D	1.01835	0.427223	0.998485	1.01998	0.317234	0.89498	-1.03511	0.0812189	0.998969	1.00711	0.681757	0.947578	-0.198853	0.581805	-0.0496761	0.891601	-0.00906007	0.981544
cVBppU30GgJiBT.oB4	ILMN_1241838	CACNA1G	-1.04977	0.21569	0.998485	-1.13154	0.0231051	0.865421	-1.01866	0.627023	0.998969	1.00408	0.905101	0.989293	-0.514904	0.127767	0.142028	0.695506	0.452249	0.189423
Tf87t0gz.4pgJt7d_k	ILMN_1256998	CACNA1G	-1.01949	0.560928	0.998485	-1.05211	0.165579	0.869529	1.01972	0.711914	0.998969	1.00292	0.895252	0.987686	-0.221526	0.5385	0.141408	0.696782	0.0166902	0.9635
lV1NUp7SnSb0.hNT_c	ILMN_1246201	CACNA1H	1.03771	0.634292	0.998485	1.26864	0.0544349	0.865421	-1.1453	0.00434937	0.998969	1.05304	0.255603	0.771233	-0.0917662	0.800943	0.378423	0.280905	-0.770094	0.0151942
TKdVRkpfOAIJrfh.hc	ILMN_2752030	CACNA2D1	-1.11123	0.18713	0.998485	1.01406	0.928874	0.993023	1.01553	0.824103	0.998969	-1.07817	0.0457158	0.509611	0.4186	0.2286	0.380786	0.277665	0.0267329	0.941564
ZLfSlSml_eeeVev2Lc	ILMN_2762672	CACNA2D3	1.06671	0.201951	0.998485	1.18076	0.0840223	0.865421	1.032	0.617855	0.998969	-1.03666	0.35283	0.835078	-0.206136	0.567754	-0.455463	0.185904	-0.170509	0.637668
EnRdnSiA3Sfeqanopc	ILMN_2674213	CACNB1	-1.00303	0.915007	0.998485	-1.0177	0.42237	0.90753	NA	NA	NA	-1.04345	0.147466	0.679088	0.610048	0.061088	-0.265399	0.458633	NA	NA
iOULSSv5.ODRKhyA5U	ILMN_1217815	CACNB2	1.04012	0.220944	0.998485	1.04287	0.252913	0.883779	-1.01002	0.75448	0.998969	1.04023	0.133247	0.664813	-0.498976	0.14206	0.354926	0.314234	0.0101866	0.977719
THaJOFEOFoHpJsFpfo	ILMN_2702286	CACNB3	1.00833	0.852653	0.998485	1.07847	0.279424	0.891024	1.04646	0.182496	0.998969	-1.05823	0.00826232	0.327497	0.197012	0.585377	-0.162436	0.653899	0.138738	0.702284
05UucGpGFVCFp1yVKE	ILMN_2626333	CACNB3	1.02648	0.470822	0.998485	1.01964	0.567883	0.934588	1.03641	0.336543	0.998969	-1.06786	0.0148756	0.382366	-0.385276	0.271563	-0.360647	0.305936	0.32067	0.366324
Qk3riHKgeqTPQlCJSU	ILMN_3153753	CACNB3	-1.07559	0.105465	0.998485	1.16392	0.342302	0.898965	1.02724	0.656874	0.998969	-1.00407	0.891087	0.987181	0.265777	0.489431	0.113251	0.755417	0.383468	0.274011
61VOzhh1xuVq.ih2ik	ILMN_3074710	CACNB3	1.01198	0.675	0.998485	NA	NA	NA	1.00572	0.764048	0.998969	-1.0163	0.363155	0.840364	-0.12367	0.733572	NA	NA	-0.104588	0.788869
Wp74zVKc9e7d547rqo	ILMN_3123491	CACNB4	1.00418	0.950146	0.998485	1.08115	0.34538	0.898965	1.0204	0.663334	0.998969	-1.07356	0.0437959	0.501895	-0.131437	0.717397	-0.804152	0.00898519	0.351083	0.319873
WlK3k7d6owXZXs47gY	ILMN_3047749	CACNB4	1.01519	0.602045	0.998485	-1.01668	0.600153	0.941002	1.00677	0.759599	0.998969	1.0023	0.913511	0.991054	-0.184627	0.634403	0.118212	0.744994	-0.239831	0.504519
lupuCp9BFeW1GiN1Ow	ILMN_2778812	CACNG2	-1.01254	0.745272	0.998485	-1.06438	0.0204873	0.865421	1.02749	0.376712	0.998969	-1.05694	0.0471735	0.510703	0.466578	0.174031	0.555285	0.0956476	-0.253173	0.480338
BhXqSKh3ACJx1xp618	ILMN_2843891	CACNG3	1.16534	0.104124	0.998485	1.08892	0.522709	0.926338	1.10072	0.0689763	0.998969	1.01709	0.698465	0.952024	0.386758	0.269565	-0.0109486	0.976053	0.140179	0.699314
fhIrNSO_NHHsol9kn8	ILMN_1248692	CACNG3	1.12194	0.163104	0.998485	1.03258	0.711095	0.961393	1.09294	0.179941	0.998969	1.05573	0.269408	0.777817	-0.0609222	0.867226	-0.267923	0.454208	0.0232818	0.949099
TXgjRaJT1Tq4ntTsRk	ILMN_2662214	CACNG4	1.08521	0.0588512	0.998485	1.03363	0.116806	0.865421	-1.00897	0.602676	0.998969	1.00635	0.745311	0.961013	0.0655334	0.85726	-0.178631	0.621476	-0.0990381	0.785467
K93dwBH3c0W5Sn5_7E	ILMN_2812240	CACNG5	1.00803	0.966156	0.998485	1.1706	0.232355	0.883779	-1.37614	0.0340282	0.998969	1.08609	0.538952	0.905487	0.195033	0.589226	0.413221	0.235254	-0.366539	0.331921
9Qno5m3q5nYdQf_0O8	ILMN_2725698	CACNG5	-1.02984	0.822892	0.998485	1.04204	0.533021	0.928637	-1.15708	0.0875578	0.998969	1.0168	0.824894	0.977831	0.205748	0.5685	0.816882	0.00719675	-0.579502	0.101968
oSx.RzZxq61.l9nn10	ILMN_2599327	CACNG7	1.02922	0.508641	0.998485	1.02531	0.435199	0.913041	-1.05754	0.0410994	0.998969	1.03057	0.123125	0.649071	-0.364806	0.299977	0.626248	0.0527263	-0.140441	0.698774
xbgjQUfVooRocYUYSY	ILMN_2709881	CACNG8	-1.01577	0.467694	0.998485	NA	NA	NA	NA	NA	NA	NA	NA	NA	-0.667507	0.034951	NA	NA	NA	NA
rnqIyDEgu.t7L4TyNU	ILMN_2638958	CACYBP	-1.03879	0.302144	0.998485	-1.03218	0.636518	0.949555	-1.00601	0.955926	0.998969	-1.00728	0.768986	0.964968	-0.0355456	0.922342	0.239738	0.50469	-0.059082	0.871208
NTThWpQggjrrjkVDlU	ILMN_2761247	CAD	-1.00511	0.841914	0.998485	1.03297	0.123993	0.865421	1.00364	0.846699	0.998969	1.00618	0.738471	0.95988	0.191568	0.595988	0.488169	0.152291	0.00965151	0.978889
6.Q_u.9bdKyPkC7KVQ	ILMN_2505841	CADM1	-1.01974	0.816203	0.998485	1.01453	0.815847	0.976634	-1.00693	0.870144	0.998969	-1.04238	0.375467	0.846547	0.561739	0.0910485	0.548024	0.100995	0.227759	0.526828
3kuWLO10_9GNUPd6ek	ILMN_2805442	CADM2	1.06458	0.126613	0.998485	1.01059	0.739735	0.966315	1.02181	0.400551	0.998969	1.01504	0.617394	0.930421	-0.424215	0.221766	-0.097552	0.788624	-0.288797	0.418363
0rHTWIq8OoFRM_BOzU	ILMN_1254663	CADM3	1.02576	0.382757	0.998485	1.05743	0.264349	0.886855	1.01915	0.420417	0.998969	1.02778	0.389331	0.852812	0.294083	0.442414	0.433792	0.210386	0.0225456	0.950707
Ze07E_R.jeweJhXqt4	ILMN_1258636	CADPS	1.0535	0.339562	0.998485	-1.10049	0.145005	0.865421	-1.05425	0.146541	0.998969	-1.09952	0.0300784	0.457255	-0.215064	0.550709	0.594168	0.0700873	-0.17275	0.633186
ZsU7ZSu59QRC7BJ_Wk	ILMN_2998313	CADPS2	-1.01416	0.763	0.998485	1.06555	0.560562	0.932426	1.04275	0.324129	0.998969	-1.09526	0.0141201	0.380549	-0.366445	0.297647	0.477128	0.16319	-0.0488236	0.893453
fXfDfUSPXJ.3HXW6Ok	ILMN_2590164	CADPS2	1.04955	0.283868	0.998485	1.02269	0.299505	0.891024	-1.00249	0.938964	0.998969	1.02662	0.23765	0.761195	-0.492799	0.147855	0.18799	0.602999	-0.0990387	0.785465
Bice6KuHld1_734bu4	ILMN_2827729	CALB2	-1.01773	0.95606	0.998485	-1.34867	0.285529	0.891024	-1.89211	0.0199255	0.998969	1.12875	0.561813	0.913298	0.223815	0.534201	0.633442	0.0670242	-0.17784	0.647121
TWCIP1.7n0pJG6nUmc	ILMN_2597412	CALB2	1.05858	0.831679	0.998485	-1.40815	0.130055	0.865421	-1.53321	0.0245348	0.998969	1.08423	0.570964	0.91543	0.293117	0.411115	0.763893	0.0165684	-0.278177	0.468585
BF0KozgEeXfnfeqETo	ILMN_3028637	CALCA	-1.05627	0.169967	0.998485	-1.15008	0.213842	0.883043	-1.02466	0.26675	0.998969	-1.01338	0.55941	0.912425	-0.0914757	0.801563	-0.527603	0.117036	-0.211437	0.55761
xoFKOiOH9X5qDIPPVE	ILMN_1241128	CALCOCO1	1.00952	0.751341	0.998485	1.01055	0.612188	0.945552	1.01463	0.492827	0.998969	-1.00853	0.679115	0.947269	0.471832	0.168581	-0.272329	0.44653	-0.14123	0.697148
0SoJIT4aoa0rAcYIv4	ILMN_2856697	CALM2	-1.10554	0.0885391	0.998485	1.0905	0.197957	0.875854	-1.01417	0.827224	0.998969	1.07065	0.148047	0.680328	0.551355	0.0985189	-0.378915	0.280229	-0.152635	0.673782
oyL4qQqSspuKe6H_aA	ILMN_1215681	CALM3	-1.03119	0.368546	0.998485	-1.02708	0.607422	0.944217	1.01104	0.746608	0.998969	1.00775	0.744168	0.960184	0.81665	0.00393737	-0.194355	0.590548	0.253124	0.480426
Hr9Tp36f3v3gtTVkUk	ILMN_1249022	CALN1	1.04341	0.547556	0.998485	1.26771	0.0287834	0.865421	1.03764	0.42504	0.998969	1.05484	0.274838	0.782299	-0.423076	0.223143	-0.165665	0.647391	-0.619249	0.0562393
0ChXjnlCWgh6jgYlCM	ILMN_2861176	CALR	1.0934	0.189521	0.998485	1.00671	0.861931	0.981196	-1.01411	0.815383	0.998969	-1.03726	0.292795	0.797461	-0.113186	0.755552	0.415833	0.232009	-0.380581	0.277945
QhuAKTPiMuA0VtVHXU	ILMN_1218668	CALU	1.07343	0.0563767	0.998485	-1.00049	0.978688	0.997382	1.02303	0.244614	0.998969	-1.01578	0.52095	0.902475	-0.290995	0.414666	-0.375488	0.28496	-0.610092	0.0610639
fcFUtyiw4E0eX1KV0E	ILMN_2771956	CALU	1.05014	0.370095	0.998485	1.00031	0.993376	0.999326	-1.01137	0.649152	0.998969	1.02155	0.501529	0.899728	-0.171345	0.635994	-0.264003	0.461089	0.664026	0.036265
3gTR5fUpXQez7wohSI	ILMN_1228287	CALU	1.00416	0.910903	0.998485	1.00737	0.791092	0.973843	-1.00749	0.779398	0.998969	1.0181	0.438905	0.874675	-0.170121	0.638445	-0.126829	0.726981	-0.0309953	0.932263
6jTsQpTes4UvxeVI6c	ILMN_2647530	CALY	-1.01755	0.630497	0.998485	-1.0046	0.87919	0.982265	-1.0354	0.169172	0.998969	-1.01878	0.332641	0.825167	0.41226	0.236456	0.108726	0.764954	0.320257	0.366977
fFaIIr8XuJKX5JFTo8	ILMN_2944939	CAMK1	-1.02205	0.683617	0.998485	1.03443	0.577444	0.936521	1.02901	0.53948	0.998969	-1.01167	0.708921	0.954815	0.71029	0.0213451	0.0364868	0.920291	0.122572	0.735865
6n69BfhE0rdTsfswpI	ILMN_1220441	CAMK1D	-1.08655	0.120991	0.998485	1.03232	0.38353	0.899257	-1.00573	0.871198	0.998969	-1.03717	0.1846	0.714797	-0.313164	0.378277	0.113952	0.753941	-0.400179	0.25184
NVxLCnuh561PrtNExM	ILMN_1228546	CAMK1G	1.06035	0.0842113	0.998485	NA	NA	NA	1.04265	0.201457	0.998969	1.02479	0.292073	0.797333	-0.0566605	0.876452	NA	NA	-0.0188465	0.958788
K1KPJ9UeRohUpR1Anc	ILMN_2856865	CAMK1G	-1.05787	0.0821034	0.998485	-1.0541	0.0553474	0.865421	1.01914	0.622376	0.998969	1.01993	0.489258	0.895877	0.432431	0.245046	-0.0992507	0.799461	0.426639	0.218853
NX6qDm.lKVbnp9.vHM	ILMN_2596479	CAMK2A	-1.04754	0.501882	0.998485	1.31853	0.260116	0.886136	1.05723	0.259544	0.998969	-1.01856	0.473347	0.891097	0.333555	0.346253	-0.212575	0.555442	0.301434	0.397331
TofG_eXdbn.rd3unO8	ILMN_2677393	CAMK2A	1.23325	0.0415908	0.998485	1.26515	0.17207	0.871047	1.0395	0.552772	0.998969	-1.01082	0.825638	0.977831	-0.0787331	0.828835	0.0147792	0.967678	-0.183733	0.611379
HKEdedwenK72Suum2E	ILMN_1236009	CAMK2B	1.03008	0.543728	0.998485	1.18186	0.077911	0.865421	-1.06044	0.0654457	0.998969	-1.04777	0.132084	0.663035	0.197362	0.584698	0.511883	0.130407	-0.44676	0.227982
0teV63X0MBB_S3uNOk	ILMN_3119478	CAMK2D	1.00097	0.9828	0.998485	1.00604	0.840137	0.978857	-1.03538	0.0858648	0.998969	-1.01142	0.640743	0.935983	-0.359047	0.308245	0.451963	0.189739	0.267817	0.454394
uQS5R99Pe10KRSmrjU	ILMN_1222123	CAMK2D	1.01922	0.679173	0.998485	1.01118	0.605744	0.944217	-1.03991	0.0989713	0.998969	1.03672	0.132586	0.664191	-0.394219	0.259629	0.69961	0.0359173	0.145573	0.688222
uxVpnolUBx7DUQV4aA	ILMN_3070701	CAMK2D	-1.00141	0.960164	0.998485	NA	NA	NA	NA	NA	NA	NA	NA	NA	-0.646404	0.0434321	NA	NA	NA	NA
30opEonqAIgcSLOiUk	ILMN_3135323	CAMK2G	-1.03894	0.246274	0.998485	-1.0594	0.052555	0.865421	1.02621	0.456965	0.998969	-1.05668	0.00802134	0.323784	0.348504	0.323687	0.534671	0.111316	-0.0906819	0.803256
uSUEjF9NEq.r.np_CE	ILMN_2765196	CAMK2G	-1.00465	0.935179	0.998485	-1.13148	0.036646	0.865421	1.02632	0.549971	0.998969	-1.01447	0.642631	0.936381	0.437362	0.206231	-0.299034	0.401285	0.200747	0.578139
cMqvd8KdlJ5e.5Os.k	ILMN_2810963	CAMK2N1	1.00065	0.985674	0.998485	1.13658	0.321758	0.895167	1.10166	0.015211	0.998969	-1.06303	0.0435778	0.501895	0.56587	0.0881807	-0.173638	0.631413	-0.0710228	0.845419
93E0HzlyiSSslR7QKk	ILMN_1242310	CAMKK1	1.01231	0.847747	0.998485	-1.02486	0.579695	0.938067	1.03153	0.391099	0.998969	-1.06889	0.0584426	0.547291	-0.0246103	0.946198	-0.0895429	0.805688	-0.0522697	0.885972
iqpo8go2u4VGxAVTl4	ILMN_2846803	CAMKK2	1.06348	0.192307	0.998485	1.06855	0.565147	0.934588	1.04367	0.242558	0.998969	1.00022	0.995428	0.998817	-0.0138898	0.971708	0.339262	0.337545	0.357911	0.30989
3eRqnnkV5v1Mkk7XGg	ILMN_1256263	CAMKK2	1.12722	0.154315	0.998485	1.05944	0.55748	0.931905	1.0255	0.522337	0.998969	1.01488	0.667246	0.94172	-0.247768	0.490073	-0.204709	0.570497	-0.328744	0.353681
NkmM6op.13_3FNIp4o	ILMN_1243596	CAMKV	1.0884	0.0927455	0.998485	1.16965	0.259867	0.886136	-1.01734	0.64265	0.998969	1.02331	0.529401	0.903357	-0.0339384	0.925845	-0.00499818	0.989067	0.0897451	0.805256
iCuCGGueEnme_e3qPU	ILMN_2728034	CAML	1.0225	0.57992	0.998485	1.02363	0.500561	0.919326	-1.02016	0.558372	0.998969	1.03859	0.135332	0.66654	0.562106	0.0907915	-0.632065	0.0499201	0.116491	0.748607
cVWnp1GJH9x_5Op_vw	ILMN_1220834	CAMTA2	1.03859	0.597393	0.998485	1.02114	0.819656	0.977309	-1.00326	0.94015	0.998969	-1.06233	0.121799	0.648629	-0.406683	0.24349	-0.00248515	0.994564	0.291158	0.414393
E4_30OoB3HW6OFkSq0	ILMN_2758338	CANT1	1.0188	0.477926	0.998485	NA	NA	NA	1.03448	0.113009	0.998969	NA	NA	NA	-0.718963	0.0191223	NA	NA	0.342941	0.331993
B7nqJ0lAXX47u0Hu9o	ILMN_3113639	CANT1	1.01615	0.823589	0.998485	-1.03431	0.316854	0.894812	-1.01729	0.509849	0.998969	1.01437	0.643165	0.936381	-0.504052	0.137404	-0.109102	0.764161	-0.468302	0.172232
9E0g35Ek_QDVLnV3KE	ILMN_2648661	CAP1	1.03389	0.657613	0.998485	1.14538	0.057507	0.865421	-1.02309	0.605165	0.998969	1.02934	0.437904	0.874441	-0.580487	0.0784998	-0.0519045	0.886764	-0.180455	0.617861
E0Kg5eKji7HrzooHqo	ILMN_2981550	CAPN1	1.01737	0.550212	0.998485	-1.01216	0.556238	0.931905	-1.02776	0.234735	0.998969	1.00186	0.934416	0.993628	-0.472862	0.167524	-0.252771	0.511695	-0.112158	0.757718
NLq55KmqcgdULrN9PU	ILMN_2758502	CAPN10	1.00249	0.938367	0.998485	1.04302	0.170275	0.870618	-1.01318	0.645777	0.998969	-1.02174	0.39686	0.855605	-0.224357	0.533186	0.0177825	0.961113	-0.0297719	0.934932
loSt6BTg9cYjmgJHoI	ILMN_2683586	CAPN2	1.01451	0.72968	0.998485	-1.03812	0.492883	0.919149	-1.0318	0.266567	0.998969	-1.03862	0.205655	0.733731	-0.421026	0.225633	0.106608	0.769428	-0.712356	0.0208003
9Vr_SGGJw02H_EP_5o	ILMN_2620030	CAPN2	1.04504	0.429916	0.998485	-1.01802	0.719351	0.961735	-1.00229	0.929881	0.998969	1.05851	0.0113622	0.360287	-0.401184	0.25054	0.00118434	0.997409	0.0400291	0.912577
HY7oSt6BTg9cYjmgJE	ILMN_1219583	CAPN2	1.06965	0.140931	0.998485	-1.003	0.946479	0.994451	1.00093	0.964847	0.998969	1.03643	0.126018	0.653841	-0.388467	0.267271	-0.178392	0.621952	-0.326908	0.356536
QS64EBEKF4IRCr0Z6I	ILMN_2867771	CAPN3	-1.00161	0.947381	0.998485	NA	NA	NA	-1.03671	0.103037	0.998969	NA	NA	NA	0.375457	0.285002	NA	NA	-0.284913	0.424929
HkVKKX7LfUPkojSVxI	ILMN_2627566	CAPN5	-1.00554	0.941032	0.998485	-1.09482	0.0412059	0.865421	1.04646	0.352921	0.998969	-1.04767	0.10365	0.622341	-0.502987	0.138373	-0.431168	0.21347	0.349726	0.321876
90TfNULVF1BDP0ufeQ	ILMN_2695143	CAPN6	-1.04665	0.117304	0.998485	NA	NA	NA	NA	NA	NA	NA	NA	NA	-0.291723	0.413446	NA	NA	NA	NA
uaLeudvuu.rCj.Iy6A	ILMN_2675535	CAPN7	1.05723	0.300204	0.998485	-1.02526	0.368041	0.899257	-1.01536	0.632199	0.998969	-1.03109	0.143172	0.675683	-0.284171	0.426189	0.311693	0.380641	-0.0669971	0.8541
0x4WNKhzayU4H1Kpf4	ILMN_2772248	CAPNS1	1.00304	0.955701	0.998485	-1.07797	0.383831	0.899257	-1.01828	0.575497	0.998969	-1.01733	0.600153	0.925815	0.40888	0.240705	-0.411164	0.237829	0.334858	0.344255
ZOjow0wR.60Tv915Jc	ILMN_1247066	CAPRIN1	1.04794	0.355778	0.998485	-1.04817	0.35959	0.899257	-1.02478	0.627459	0.998969	1.08454	0.0600054	0.550232	-0.265507	0.458443	0.639905	0.0462982	-0.320809	0.366105
9m034l_REMQx0j10V8	ILMN_2761008	CAPRIN1	1.12327	0.0800967	0.998485	1.00313	0.948658	0.994451	-1.00706	0.863013	0.998969	1.07055	0.0121685	0.361105	-0.592577	0.0710338	0.0525359	0.885394	-0.810339	0.00447161
0T4RI7sfTTTjhhp_gk	ILMN_2764466	CAPSL	-1.02764	0.462304	0.998485	NA	NA	NA	NA	NA	NA	NA	NA	NA	-0.078576	0.829172	NA	NA	NA	NA
KvqKQL9egPU6SSfdyo	ILMN_2921526	CAPZA1	1.00734	0.813119	0.998485	-1.01251	0.72439	0.963031	-1.01192	0.627725	0.998969	-1.00695	0.735376	0.958898	-0.463969	0.176776	-0.417998	0.229339	0.621206	0.0552421
o13p1Cl59UYb9TIhbs	ILMN_3104349	CAPZB	1.05197	0.230753	0.998485	1.01076	0.803543	0.975633	1.03719	0.351793	0.998969	1.01795	0.556646	0.910454	0.0184976	0.95955	-0.29835	0.402416	0.278971	0.435067
KlseVPEL4XUa45zp5A	ILMN_1220165	CAPZB	1.07386	0.181773	0.998485	1.06937	0.0599653	0.865421	1.00481	0.911625	0.998969	-1.00046	0.986379	0.998221	0.366066	0.298185	-0.468407	0.172122	-0.210137	0.560091
HLnhUmUrcTUl4w_JYU	ILMN_3031009	CAPZB	1.00638	0.868765	0.998485	-1.00936	0.883814	0.982903	1.00233	0.944786	0.998969	-1.01481	0.606275	0.928639	-0.109605	0.7631	-0.0654471	0.857446	0.0356169	0.922187
TGtniHVQYo8ZWXveL8	ILMN_1248563	CAR11	1.00577	0.921583	0.998485	1.23469	0.0839685	0.865421	-1.01474	0.682379	0.998969	-1.00211	0.950797	0.99602	-0.272313	0.446558	-0.483688	0.156659	-0.0478771	0.895509
f2X7nXwd5bmK5Curlw	ILMN_2891583	CAR12	1.08447	0.00534709	0.896559	1.05929	0.16501	0.869529	-1.00361	0.892754	0.998969	1.02613	0.309344	0.805783	-0.610329	0.0609359	-0.326299	0.357486	-0.693548	0.0261286
rq3K7qDfp6O3_X3np4	ILMN_2973824	CAR14	1.01468	0.744812	0.998485	-1.1164	0.36332	0.899257	-1.02994	0.154723	0.998969	-1.00014	0.994092	0.998817	-0.193519	0.592177	0.0532546	0.883835	0.225766	0.530548
TFGWp7iUmud6Ht.gBE	ILMN_2871660	CAR15	1.00546	0.834297	0.998485	1.03598	0.12256	0.865421	1.01065	0.542308	0.998969	1.0002	0.99039	0.998817	0.269528	0.451404	0.281241	0.43118	0.310973	0.381801
9VdLh1xI_NS.R.R6p0	ILMN_2606746	CAR2	1.02964	0.65718	0.998485	-1.13309	0.338727	0.898965	1.04757	0.209945	0.998969	1.02278	0.576066	0.915882	0.10217	0.778822	-0.602974	0.0649967	-0.534845	0.111177
uuOIe03oe7EBBU0I1E	ILMN_2655795	CAR4	1.01177	0.804378	0.998485	-1.06913	0.0712241	0.865421	1.1037	0.0303516	0.998969	-1.01122	0.7416	0.95988	0.184928	0.609023	0.0985206	0.800912	0.53909	0.107831
3OIo1M66EH1pRRJZ4I	ILMN_2752362	CAR7	-1.00862	0.759578	0.998485	1.01117	0.594395	0.939387	-1.03762	0.104483	0.998969	1.03054	0.104574	0.622341	0.629675	0.0510608	0.476154	0.164174	-0.0244907	0.946459
ou7ntOCMUae960nXFc	ILMN_2606660	CARD10	-1.03015	0.664242	0.998485	-1.03068	0.558892	0.931905	-1.08085	0.0478419	0.998969	-1.01563	0.630167	0.935008	0.1573	0.664295	0.114202	0.753416	-0.298257	0.435655
ER3rOvIf6kkTr4XnLg	ILMN_1225035	CARHSP1	1.11504	0.0980759	0.998485	1.0484	0.58094	0.938523	-1.02194	0.649266	0.998969	1.05105	0.12308	0.649071	-0.553056	0.09727	-0.172066	0.634552	-0.656343	0.0392831
3SSnfRheBe5Iei4SHg	ILMN_2746968	CARKD	1.03823	0.637867	0.998485	-1.0123	0.772991	0.972192	-1.07012	0.100067	0.998969	-1.02409	0.339962	0.82884	-0.365789	0.298578	-0.30506	0.391392	-0.339522	0.337152
iJElJ6F3X0HFKUTrRQ	ILMN_3003076	CARM1	-1.00313	0.941922	0.998485	1.01647	0.511366	0.921277	1.03725	0.168838	0.998969	1.00846	0.735148	0.958898	0.432263	0.21218	0.0413297	0.909746	-0.265081	0.459192
6KAqlKNqCe7h7VYoH0	ILMN_3123063	CARTPT	1.12741	0.245809	0.998485	1.06279	0.689844	0.957087	-1.11588	0.0361496	0.998969	1.14293	0.0563936	0.538571	-0.178523	0.621691	0.244403	0.526228	-0.411423	0.271261
WC5_4KhhJZRfa9Uz1c	ILMN_2719755	CARTPT	1.19765	0.200629	0.998485	1.21469	0.317769	0.895167	-1.1238	0.176581	0.998969	1.21144	0.0311438	0.465458	-0.22495	0.532075	-0.0820194	0.821785	-0.656825	0.0390888
lfUqsnrq7n.TKfV.l8	ILMN_2999007	CASC3	-1.00915	0.824244	0.998485	1.00032	0.991178	0.999107	-1.06247	0.0421443	0.998969	1.0176	0.525763	0.902691	-0.29363	0.410258	0.177304	0.624112	0.193934	0.591368
lvr13vMAktH4.zrFzc	ILMN_1246107	CASC4	-1.06354	0.120655	0.998485	-1.05538	0.506332	0.920144	-1.00965	0.911277	0.998969	-1.02025	0.512018	0.900776	0.724135	0.0273765	0.232777	0.517507	-0.0851481	0.815083
lTuhLZib857a7t7voQ	ILMN_1212894	CASK	1.00509	0.930654	0.998485	1.0479	0.368399	0.899257	-1.00327	0.908764	0.998969	-1.02621	0.367999	0.843176	0.181354	0.61608	-0.0366384	0.919961	0.589223	0.0730569
f461Qgnt1EFEt7kn.M	ILMN_2874454	CASKIN1	-1.02401	0.438192	0.998485	-1.0677	0.0319093	0.865421	1.01995	0.433171	0.998969	-1.03149	0.123866	0.650297	0.0896315	0.805499	-0.33931	0.337473	0.610892	0.0606318
lVOjvedOt4pzvuy9t0	ILMN_2622446	CASKIN1	1.03855	0.582601	0.998485	-1.06117	0.172723	0.872441	1.02402	0.59279	0.998969	-1.02646	0.429855	0.871832	0.283215	0.427815	0.301526	0.39718	-0.0930662	0.798172
lkntHXpn103gTnhZ00	ILMN_1231762	CASKIN1	1.09395	0.0638232	0.998485	-1.09224	0.00847814	0.844109	1.01673	0.773194	0.998969	1.00749	0.820296	0.977728	-0.396273	0.25693	0.472605	0.167787	0.144598	0.690223
NqS4rBI1UqVId8QexM	ILMN_1259822	CASKIN2	-1.02253	0.449271	0.998485	1.00926	0.730346	0.964704	1.01057	0.680079	0.998969	-1.03116	0.125064	0.651828	0.287923	0.419835	0.369021	0.294002	-0.612874	0.0595704
QR54yrhXhAG.cXfVqE	ILMN_1247592	CASP1	-1.0886	0.111507	0.998485	-1.0358	0.272305	0.890408	-1.06309	0.192605	0.998969	1.08579	0.00190835	0.199285	-0.034775	0.924022	-0.298481	0.435293	0.192847	0.619108
3yDfRH1R5Qj.s_U0rk	ILMN_2637266	CASP2	1.01705	0.675891	0.998485	-1.01294	0.704003	0.959298	-1.0181	0.489796	0.998969	1.02073	0.538316	0.905487	-0.272442	0.446334	0.192204	0.6203	-0.405704	0.244737
Qp16xPSj_7iOemKxpI	ILMN_2923865	CASP6	-1.01414	0.491794	0.998485	1.05016	0.0722008	0.865421	1.00667	0.817975	0.998969	1.02866	0.108042	0.62635	0.230587	0.521565	0.0799892	0.826139	-0.104947	0.77294
i6H3kCFaOQ2kIJK5Xk	ILMN_2923864	CASP6	1.01364	0.553664	0.998485	1.04388	0.0601716	0.865421	1.00065	0.971549	0.998969	-1.0019	0.9234	0.991652	0.463251	0.177537	-0.239364	0.505374	-0.496094	0.144746
fWI17g6Besz0tH_UiU	ILMN_1243876	CASP8	1.01651	0.463065	0.998485	NA	NA	NA	NA	NA	NA	1.02462	0.179177	0.711513	-0.0304974	0.933349	NA	NA	NA	NA
6l3uj6mQK8CUqg30.c	ILMN_1217061	CASP9	-1.02615	0.470604	0.998485	1.03928	0.144482	0.865421	1.0062	0.782152	0.998969	-1.0511	0.0612836	0.554443	-0.496905	0.143987	0.363157	0.302333	0.0986249	0.786344
BVlomSHRnjh.AGMNak	ILMN_2826110	CAT	-1.00892	0.831326	0.998485	-1.06561	0.124713	0.865421	1.02859	0.505393	0.998969	-1.03876	0.109953	0.630996	0.323031	0.362604	0.20781	0.564543	-0.197485	0.584459
BrEurhJ7tfoVJAJw4I	ILMN_2721083	CATSPER2	1.00064	0.983069	0.998485	1.00869	0.666809	0.955814	1.00479	0.739356	0.998969	-1.00168	0.928548	0.991937	-0.131823	0.716597	0.0603472	0.86847	0.29104	0.414591
ou9QhO3vdXIx0v8xC0	ILMN_2632665	CAV1	-1.07304	0.110618	0.998485	-1.08964	0.191196	0.875854	-1.02268	0.600206	0.998969	1.09231	0.0124452	0.361666	-0.63819	0.0470751	-0.117383	0.746734	0.0664105	0.855366
xp9ijePkiXiHER1.hA	ILMN_2639018	CAV2	NA	NA	NA	-1.00953	0.688798	0.957087	1.04705	0.0273273	0.998969	1.03324	0.148958	0.680331	NA	NA	-0.291492	0.413834	-0.548868	0.100364
Kg4w5I4V6RXiekoJek	ILMN_2686513	CBARA1	1.02511	0.482045	0.998485	-1.02689	0.490018	0.918591	-1.00485	0.865409	0.998969	1.0153	0.654121	0.938141	0.704592	0.0228988	-0.074517	0.837896	-0.0305943	0.933138
3abd7f7AtRON3e00iA	ILMN_1216136	CBFA2T3	1.04091	0.478578	0.998485	1.03661	0.563318	0.933899	-1.03798	0.36229	0.998969	1.00639	0.841854	0.982927	-0.194017	0.591207	0.256454	0.47447	0.244829	0.495401
ErrE.3e_fdlCJ9S1pI	ILMN_2837855	CBFB	1.04703	0.394375	0.998485	-1.09871	0.0359581	0.865421	1.01903	0.444721	0.998969	1.00323	0.917543	0.991652	-0.249656	0.486662	-0.0434351	0.905165	0.470048	0.17042
QS1pLSwjROu8O6W1d4	ILMN_2757743	CBFB	1.04538	0.285229	0.998485	-1.08157	0.0688187	0.865421	1.00072	0.98202	0.998969	-1.02002	0.397854	0.856282	-0.282453	0.429113	-0.545764	0.128512	0.419785	0.227147
urH97CXgO_J9goh.eg	ILMN_2702039	CBLB	-1.00501	0.827977	0.998485	-1.03881	0.382547	0.899257	1.01527	0.761796	0.998969	-1.01077	0.669603	0.942462	-0.33156	0.349324	0.253371	0.479982	-0.00553878	0.987884
rdmPmdPZKH9Cq9tSC8	ILMN_1252953	CBLN1	-1.06683	0.48582	0.998485	-1.53275	0.127142	0.865421	-1.33349	0.0317068	0.998969	1.08739	0.0744226	0.585687	0.00906163	0.980179	0.394994	0.292739	-0.134785	0.729542
KpREPEI59AgEoUuXfU	ILMN_2894369	CBLN2	1.02392	0.648101	0.998485	-1.10628	0.0463097	0.865421	-1.03335	0.327466	0.998969	-1.0778	0.0106282	0.360287	0.184833	0.60921	-0.113417	0.755067	0.0277713	0.939297
umUBfpAsXdfrqA2DHc	ILMN_2639849	CBLN4	1.02565	0.794653	0.998485	-1.20376	0.096131	0.865421	-1.05565	0.267663	0.998969	-1.0849	0.0611072	0.553399	0.319089	0.368825	-0.150573	0.677988	-0.0549642	0.880128
EICi1OaCCvpcMuTOq0	ILMN_1236522	CBR1	-1.06074	0.43146	0.998485	-1.05545	0.229627	0.883779	1.06911	0.0290555	0.998969	-1.00971	0.806313	0.974754	0.631865	0.050015	-0.567104	0.0873352	-0.122276	0.736485
TWK6F62F04AL_6KMQA	ILMN_2608811	CBR3	-1.0383	0.336507	0.998485	1.11693	0.0428928	0.865421	1.01722	0.5808	0.998969	1.0101	0.688758	0.948341	0.743605	0.0136884	-0.696802	0.0251465	0.531236	0.114074
xy1uEC_5Afrgbed6p8	ILMN_2896768	CBR3	1.00758	0.915539	0.998485	1.22347	0.0449604	0.865421	1.00273	0.947221	0.998969	1.08099	0.0273192	0.450011	-0.0905738	0.803487	-0.589315	0.0730004	-0.313002	0.378537
Kg13OViyfEqX9d67RI	ILMN_1230318	CBS	1.0535	0.0736961	0.998485	1.00554	0.821962	0.977477	-1.0329	0.291559	0.998969	1.01203	0.565155	0.914342	0.0927148	0.798921	0.269092	0.452165	-0.0714257	0.844551
Ec5WLJ8Spf13rtEgeI	ILMN_2701582	CBS	1.04087	0.109432	0.998485	1.01272	0.625519	0.947639	-1.00401	0.857011	0.998969	-1.02158	0.297627	0.800704	-0.020688	0.954764	-0.22587	0.530354	0.0112136	0.975473
316NRxZ77j_osxswyw	ILMN_2709864	CBWD1	-1.00049	0.991049	0.998928	1.01149	0.673711	0.956739	1.0227	0.398357	0.998969	1.02039	0.358101	0.839068	-0.206586	0.566891	-0.166344	0.646026	-0.178318	0.622098
B65Z.FEigW5KXybi40	ILMN_3055904	CBX5	-1.07782	0.343382	0.998485	-1.02221	0.537159	0.929759	-1.01483	0.667845	0.998969	1.01045	0.623444	0.932416	0.615121	0.0583816	-0.0754908	0.835802	-0.2414	0.50165
fjrjfPlC9fUXXlxYoI	ILMN_2947234	CBX7	-1.01031	0.79942	0.998485	1.03159	0.396135	0.902716	-1.0182	0.396359	0.998969	1.02179	0.476332	0.892046	-0.147269	0.684745	-0.676283	0.0317818	0.366481	0.297596
uVd3hwXogLrbxI7hdA	ILMN_1232016	CBX8	-1.01479	0.581954	0.998485	1.01145	0.643301	0.94997	1.00443	0.850438	0.998969	1.02005	0.348951	0.833312	0.704841	0.0228293	0.530421	0.114734	-0.0594508	0.87041
BVFwKECJ6OB4K8UFko	ILMN_1215039	CBY1	1.02031	0.365078	0.998485	1.00203	0.921295	0.991608	-1.00897	0.593329	0.998969	NA	NA	NA	0.0869275	0.811277	-0.179421	0.619909	0.236205	0.511178
rx4VJ5XRVKlBEg4ElA	ILMN_2645613	CC2D1A	1.03186	0.695592	0.998485	-1.0217	0.498718	0.919326	1.01198	0.613513	0.998969	-1.02029	0.393863	0.854397	-0.439059	0.204274	-0.178371	0.621993	0.0896213	0.805521
B_bFnwVJVT_RT96O5c	ILMN_2731197	CC2D1B	-1.0484	0.20359	0.998485	-1.02537	0.383534	0.899257	-1.00909	0.70634	0.998969	1.00283	0.911474	0.991054	0.202973	0.573841	0.127734	0.725096	-0.362842	0.302784
Zb.t7_jc75937GgSsM	ILMN_2704619	CC2D2A	-1.04241	0.288656	0.998485	-1.01068	0.826031	0.977477	-1.03148	0.324397	0.998969	-1.06041	0.045164	0.507922	-0.224492	0.532932	0.358726	0.308709	0.158554	0.661752
TfInyLTrXRpHvnmdrE	ILMN_2516266	CCAR1	-1.04672	0.27373	0.998485	1.03501	0.139925	0.865421	-1.00555	0.875515	0.998969	1.03062	0.313774	0.809179	-0.126694	0.727262	0.425292	0.22047	0.228202	0.526002
llYXl65zo4lc4xGf5Q	ILMN_2623735	CCBL1	1.01378	0.624621	0.998485	1.01016	0.761782	0.969424	1.03805	0.0607171	0.998969	1.03202	0.194219	0.724261	-0.209557	0.561199	0.1094	0.763531	-0.216577	0.547841
W6_.el3l6hLAo6KNKU	ILMN_2986051	CCBL1	1.02569	0.452648	0.998485	1.02351	0.499593	0.919326	-1.0173	0.586938	0.998969	1.02773	0.262801	0.775663	0.365829	0.298521	-0.140375	0.69891	-0.194536	0.590195
0pSf0XRqlQz0D7EqhA	ILMN_2650557	CCBP2	1.02221	0.530765	0.998485	-1.00042	0.992896	0.999326	1.01457	0.553127	0.998969	-1.03387	0.200444	0.730075	0.00526868	0.988475	-0.500234	0.140897	-0.357572	0.310381
ciVCAC4Nqesp_DeUeU	ILMN_2660028	CCDC101	1.0094	0.780081	0.998485	-1.03086	0.406802	0.905432	1.01619	0.534746	0.998969	1.00187	0.936267	0.993628	-0.369911	0.327149	-0.605586	0.063535	0.164956	0.648818
ZKp4ogrpEIa4QKtSSw	ILMN_2872552	CCDC107	-1.08886	0.242926	0.998485	1.05074	0.201693	0.875854	-1.03938	0.252073	0.998969	-1.02176	0.489663	0.895877	0.311802	0.380465	-0.337632	0.340021	-0.0930659	0.798172
u4W4NWkiLmXv7B0Zb8	ILMN_2533766	CCDC109A	1.00603	0.844904	0.998485	1.0176	0.507025	0.920144	1.00799	0.701006	0.998969	1.02448	0.366245	0.843033	-0.783624	0.00731748	0.152367	0.674328	0.196641	0.586099
oiXoiAju4XqYHl7t4o	ILMN_2949886	CCDC111	-1.01386	0.554869	0.998485	1.00545	0.84401	0.979494	1.02287	0.298157	0.998969	1.03779	0.0511681	0.525051	-0.257658	0.472325	0.0416574	0.909032	-0.175854	0.626996
fSiSWknzIUILhU8C90	ILMN_2610277	CCDC113	-1.05594	0.132833	0.998485	-1.06799	0.00576924	0.819637	1.03171	0.0635248	0.998969	1.0073	0.675383	0.945567	-0.107886	0.766727	-0.501158	0.140047	-0.384368	0.27279
ft1wej5XU_HK4HsHMo	ILMN_1231387	CCDC114	1.02786	0.330888	0.998485	-1.00681	0.806451	0.975961	NA	NA	NA	-1.0045	0.80667	0.974796	-0.285888	0.423276	-0.269296	0.451809	NA	NA
3Kd5iKL6HULlxJ50uE	ILMN_2672035	CCDC115	1.06962	0.126537	0.998485	-1.00606	0.865217	0.981351	-1.0003	0.990812	0.998996	1.01604	0.468595	0.888147	0.307641	0.387192	-0.527511	0.117112	-0.121708	0.737672
cll.vBJBCDnkucQbno	ILMN_1259355	CCDC117	-1.03877	0.401481	0.998485	1.03359	0.267171	0.887169	-1.015	0.63224	0.998969	1.014	0.67129	0.943018	-0.50005	0.141067	-0.204636	0.570639	0.627893	0.0519223
opQgnIgnIAmhUiJTZo	ILMN_1213231	CCDC12	-1.07872	0.306728	0.998485	1.0331	0.414701	0.906111	1.01321	0.627302	0.998969	1.00946	0.776278	0.967133	0.621159	0.0552656	-0.556979	0.0944266	-0.197863	0.583726
TrhN6U6vkpRNO11_k8	ILMN_2672543	CCDC120	-1.02282	0.679584	0.998485	-1.01521	0.64755	0.951082	-1.0226	0.499152	0.998969	-1.03212	0.301281	0.800974	-0.56137	0.0913074	-0.22124	0.539038	0.106384	0.769902
chnXdKiFx4_lOP0nOs	ILMN_2745151	CCDC123	-1.0211	0.556826	0.998485	1.04064	0.221334	0.88352	-1.03304	0.190112	0.998969	1.02707	0.193069	0.722783	0.748543	0.0127468	-0.495584	0.145224	0.604651	0.0640559
3IZJl56KKCHRp0CmkI	ILMN_2944226	CCDC124	-1.00321	0.952967	0.998485	-1.01439	0.809426	0.976451	1.01137	0.749776	0.998969	-1.0244	0.305034	0.802985	0.554923	0.09591	-0.361839	0.304223	-0.0496529	0.891652
0j3ksW9rd4oteJN3j8	ILMN_2729235	CCDC126	1.01385	0.795916	0.998485	-1.02951	0.412347	0.906111	-1.00941	0.745919	0.998969	-1.02403	0.427026	0.870404	-0.544451	0.103695	0.299798	0.400025	0.206092	0.567839
NiEkSijeg6.F7iKK14	ILMN_2932814	CCDC127	1.01795	0.608622	0.998485	-1.04495	0.170779	0.870618	-1.00305	0.883867	0.998969	1.02802	0.407859	0.861643	0.224198	0.533484	-0.198386	0.58271	-0.01319	0.971152
lcQuotC1fr6RGjrzIk	ILMN_1245467	CCDC127	1.02514	0.645413	0.998485	-1.02616	0.256879	0.884665	1.00382	0.909269	0.998969	-1.0194	0.537794	0.905487	-0.470448	0.170006	-0.126279	0.728128	-0.190469	0.598139
r4g5e5fjsFeMXiTwLk	ILMN_2756733	CCDC130	-1.02715	0.410393	0.998485	-1.00546	0.829234	0.977477	-1.01396	0.595467	0.998969	-1.04859	0.0770423	0.586444	-0.500994	0.140198	0.491909	0.148701	0.133007	0.714141
3XaoT4339pexhOApL0	ILMN_2908874	CCDC132	1.0541	0.290914	0.998485	1.01368	0.769255	0.970713	-1.0046	0.90704	0.998969	-1.06165	0.0950246	0.60805	0.0176251	0.961457	0.0028815	0.993697	-0.167681	0.643338
oUA7NnzKLohFUlYXcU	ILMN_1226712	CCDC134	1.00794	0.814343	0.998485	1.03589	0.28087	0.891024	-1.03853	0.304895	0.998969	1.00606	0.779303	0.967922	-0.489412	0.151092	0.209524	0.561263	0.118223	0.744972
xWSg0gxxOC46SF6FJU	ILMN_1249790	CCDC136	-1.05014	0.325634	0.998485	-1.10833	0.0691639	0.865421	-1.00945	0.805259	0.998969	1.00466	0.855621	0.984525	0.442847	0.199942	0.0129057	0.971774	-0.0787133	0.828877
ZLOGclKGJEuJ94K5I4	ILMN_2593676	CCDC136	NA	NA	NA	NA	NA	NA	NA	NA	NA	-1.00625	0.714188	0.955334	NA	NA	NA	NA	NA	NA
Bf7Xr4A0pFeOx53nko	ILMN_1220014	CCDC137	1.08204	0.140227	0.998485	1.03548	0.364042	0.899257	-1.02867	0.341974	0.998969	-1.01119	0.721482	0.957097	-0.452686	0.188943	-0.36727	0.296477	-0.424296	0.221669
rsCt9OuwqkohMKn1Uk	ILMN_2836246	CCDC137	1.0178	0.450283	0.998485	-1.04443	0.0617102	0.865421	-1.02405	0.411926	0.998969	-1.02604	0.236217	0.759793	-0.72514	0.0176404	-0.486722	0.153693	-0.081607	0.822669
fgTJHrx5mtpa3yKdqE	ILMN_1217150	CCDC137	1.03535	0.185707	0.998485	NA	NA	NA	-1.00384	0.828051	0.998969	1.01633	0.380915	0.849242	0.120302	0.740615	NA	NA	0.502534	0.138787
Kjn1Io5KCooqBque8E	ILMN_2991166	CCDC141	-1.00993	0.618546	0.998485	NA	NA	NA	NA	NA	NA	NA	NA	NA	0.189352	0.600328	NA	NA	NA	NA
cuJcinl6p4gQIAEBWo	ILMN_2782841	CCDC144B	-1.08713	0.245466	0.998485	1.0042	0.917059	0.991589	-1.04952	0.0319378	0.998969	-1.00334	0.88172	0.985741	0.425759	0.219909	0.454185	0.187299	-0.00225327	0.995071
uFuO64VmeX0J1vVILw	ILMN_2987394	CCDC151	-1.00214	0.920487	0.998485	-1.03781	0.101892	0.865421	1.02368	0.248389	0.998969	-1.02195	0.191653	0.722032	0.740627	0.0142791	-0.272621	0.477879	-0.147206	0.684875
3UUcxddbSTqFRNXC_4	ILMN_1227083	CCDC155	-1.00166	0.951477	0.998485	1.01321	0.700697	0.958039	1.02326	0.242404	0.998969	-1.004	0.832953	0.980024	0.17949	0.619773	-0.298113	0.402808	-0.546475	0.127915
Ho4XUgonq4TOt5b0S0	ILMN_2815374	CCDC159	1.00115	0.968484	0.998485	-1.01137	0.666781	0.955814	1.01548	0.390774	0.998969	-1.01158	0.598668	0.925565	0.734951	0.0154539	-0.259533	0.468992	0.0383545	0.916223
rcKuCBJKneiufoIRvk	ILMN_3161819	CCDC160	-1.06291	0.0111952	0.972566	-1.03863	0.255061	0.884118	-1.00836	0.700232	0.998969	-1.01171	0.564375	0.914342	0.286416	0.422383	0.130596	0.719145	0.235514	0.51245
cpIjQVJA5U4MUsVFDo	ILMN_2841917	CCDC17	1.00758	0.706897	0.998485	NA	NA	NA	NA	NA	NA	NA	NA	NA	-0.138643	0.70248	NA	NA	NA	NA
KSRToXUqXiqWf5S7.A	ILMN_2759983	CCDC21	1.00538	0.848022	0.998485	1.0271	0.262456	0.886136	NA	NA	NA	NA	NA	NA	0.646599	0.0433479	-0.407877	0.241974	NA	NA
EJeTVaSKB65eX_3uJ0	ILMN_2681604	CCDC23	-1.15688	0.0499795	0.998485	-1.00324	0.917363	0.991604	-1.01436	0.671825	0.998969	1.02876	0.351343	0.833567	0.163531	0.651691	0.213356	0.581507	-0.116421	0.748753
3XnFSyMjBf.vLvwqJU	ILMN_1253682	CCDC25	1.08309	0.0146443	0.981616	1.03231	0.19372	0.875854	-1.0038	0.894687	0.998969	-1.0295	0.341232	0.829335	0.610735	0.0607166	-0.296758	0.405052	-0.605701	0.0634712
TojomaXXSXngY.Ud6A	ILMN_2619718	CCDC28A	-1.03928	0.260734	0.998485	-1.01734	0.623399	0.947439	-1.00027	0.991411	0.999162	1.00498	0.828949	0.978853	0.611467	0.0603227	-0.121735	0.737615	-0.167014	0.644678
6nok72ojkogvpSHkfQ	ILMN_2694257	CCDC28B	-1.04214	0.444837	0.998485	1.02712	0.437274	0.913041	-1.03238	0.310742	0.998969	1.03898	0.101775	0.619362	0.383735	0.273648	0.122546	0.73592	0.0388059	0.91524
lp_XiiSCCEOnhZBehQ	ILMN_1220430	CCDC28B	-1.09262	0.120988	0.998485	1.01186	0.777564	0.972372	1.02941	0.481018	0.998969	1.0048	0.875759	0.985484	0.40648	0.243748	-0.573009	0.083362	-0.136225	0.707477
TQnyq46LSh2iB7oJYI	ILMN_2611180	CCDC3	-1.06027	0.438021	0.998485	-1.11856	0.29041	0.891024	1.05346	0.434559	0.998969	-1.03423	0.451723	0.882788	-0.251646	0.483079	-0.235008	0.513383	0.416179	0.231582
3o9nREdNsDoaHVKBak	ILMN_2588650	CCDC32	-1.02437	0.671994	0.998485	-1.00058	0.988468	0.998659	1.02702	0.463437	0.998969	1.04646	0.101616	0.619362	0.501079	0.14012	-0.672822	0.0330071	-0.0635926	0.861452
fVLfXV.TT0rZ2KOwd0	ILMN_3004786	CCDC39	-1.00485	0.812147	0.998485	NA	NA	NA	NA	NA	NA	1.01598	0.434369	0.873513	-0.0264503	0.94218	NA	NA	NA	NA
HLeGrBu6R4hl99e.lA	ILMN_2757445	CCDC41	1.02318	0.58289	0.998485	1.03629	0.325502	0.895167	1.02357	0.453537	0.998969	-1.02864	0.217773	0.742118	-0.219458	0.542397	0.663006	0.0516018	0.261486	0.465531
WUlE1H7QwKX3sXh.qQ	ILMN_1247240	CCDC43	1.07372	0.0140925	0.972566	1.07175	0.0278098	0.865421	-1.0458	0.0636153	0.998969	1.01257	0.643017	0.936381	0.316033	0.407389	0.24658	0.492224	-0.373587	0.287602
6qKI7efuu5frjn_Qq0	ILMN_3107945	CCDC46	-1.01448	0.554944	0.998485	1.01555	0.434544	0.913041	-1.0075	0.714277	0.998969	-1.03972	0.0406414	0.497026	0.423375	0.222781	-0.408696	0.240938	-0.144748	0.689914
fCU7Inr5Ir7tfnlvJ0	ILMN_2706051	CCDC47	1.0667	0.22508	0.998485	-1.0128	0.586557	0.939093	-1.04014	0.103889	0.998969	1.0867	0.00453234	0.268381	-0.575844	0.0814965	0.265053	0.459242	-0.557939	0.118508
WuAlOyJ6_SK_7X55bw	ILMN_2706057	CCDC47	1.03929	0.420779	0.998485	-1.00798	0.746952	0.967209	-1.02129	0.56836	0.998969	1.06297	0.0817216	0.591108	-0.677684	0.0312945	-0.0615389	0.865892	-0.384054	0.273216
NjpegCH5LQOnqufSek	ILMN_1248125	CCDC51	-1.01349	0.558785	0.998485	-1.02798	0.255836	0.884211	-1.02069	0.387215	0.998969	1.03137	0.096037	0.608755	-0.007263	0.984113	-0.0549488	0.880162	-0.0915102	0.801489
r19LhwqHqoNESBugg4	ILMN_2852067	CCDC53	-1.10729	0.0422188	0.998485	1.01578	0.523669	0.926471	1.03997	0.406792	0.998969	1.01718	0.563805	0.91415	0.0786649	0.828981	0.405412	0.24511	0.0771585	0.832217
HmU0gDteFslCjUazlI	ILMN_1244642	CCDC53	-1.05921	0.166917	0.998485	1.00342	0.943501	0.994451	-1.01333	0.600877	0.998969	-1.01843	0.525156	0.902691	0.20991	0.587767	-0.503385	0.138011	0.187202	0.604548
WlWuUDpgJgIlsggL0g	ILMN_2744592	CCDC53	-1.07761	0.18139	0.998485	1.01864	0.478364	0.915974	1.00757	0.716505	0.998969	1.00476	0.820659	0.977756	-0.138161	0.703476	-0.736433	0.0151408	0.466487	0.174126
Hl663xJNHpEcG2h7uM	ILMN_2932518	CCDC56	-1.11218	0.187579	0.998485	-1.00485	0.917865	0.991608	1.03348	0.301781	0.998969	-1.01661	0.567156	0.914342	0.53988	0.107214	-0.638232	0.0470556	0.0303489	0.933673
QSSaV3KNZBxBdChwt0	ILMN_1226713	CCDC57	-1.03666	0.188107	0.998485	NA	NA	NA	1.00131	0.927782	0.998969	1.02399	0.209012	0.735182	0.0795875	0.827001	NA	NA	0.11784	0.745776
lhI7SSpSveKut3iUko	ILMN_2949122	CCDC58	-1.06692	0.249543	0.998485	1.00077	0.980807	0.997519	1.01408	0.686037	0.998969	1.03831	0.0453457	0.508615	0.084529	0.816408	-0.189155	0.600714	-0.0583184	0.872861
oVIkXgEXc3pYIoCHSA	ILMN_2712584	CCDC59	-1.14646	0.138341	0.998485	-1.01025	0.629872	0.948554	-1.02387	0.427748	0.998969	1.01853	0.555912	0.910454	0.57622	0.0812508	-0.0805913	0.824847	0.0590851	0.871202
ThwAqUlwXg.Ejos33k	ILMN_2877436	CCDC59	-1.01052	0.784033	0.998485	-1.03592	0.172481	0.871999	-1.00995	0.798126	0.998969	-1.00948	0.751541	0.961586	0.391976	0.262595	0.26151	0.465489	0.120556	0.740084
inWH1KieE6eAyOVl4I	ILMN_3116014	CCDC61	-1.04007	0.163639	0.998485	-1.01966	0.509104	0.920144	-1.00945	0.615409	0.998969	1.00359	0.8594	0.984632	0.454941	0.186473	-0.0484925	0.894172	0.513483	0.129005
icukt4Ar1V8nokqSUQ	ILMN_2847304	CCDC64	1.01914	0.480063	0.998485	NA	NA	NA	-1.05589	0.00742933	0.998969	1.00522	0.807428	0.97498	-0.586014	0.0750268	NA	NA	-0.27633	0.439608
0cQbTYJZUT5dUzXuFo	ILMN_1253268	CCDC65	-1.01755	0.563689	0.998485	-1.04719	0.10022	0.865421	1.01583	0.49563	0.998969	-1.01533	0.492524	0.895877	0.164627	0.649481	-0.377484	0.2822	0.25501	0.477048
r7cQbTYJZUT5dUzXuE	ILMN_2595469	CCDC65	-1.02611	0.391643	0.998485	-1.0342	0.285513	0.891024	-1.00528	0.830239	0.998969	-1.0092	0.73236	0.957945	0.189815	0.59942	-0.565065	0.0887348	-0.305708	0.390335
ionn0fLoiAQ1Yg3dUA	ILMN_2699509	CCDC66	1.0232	0.312468	0.998485	NA	NA	NA	1.00469	0.795305	0.998969	-1.03442	0.091107	0.604039	-0.40703	0.243049	NA	NA	-0.244453	0.496084
f9RKdTf3Wq1JdFO1XA	ILMN_2590200	CCDC71	1.01713	0.429117	0.998485	1.01142	0.702104	0.958848	1.02462	0.252247	0.998969	-1.01648	0.400078	0.858172	-0.323249	0.362262	-0.244803	0.495448	-0.0171587	0.962476
xihyJQfFerhSkE1e6Q	ILMN_2901363	CCDC75	1.05401	0.281438	0.998485	-1.00475	0.829935	0.977477	1.01888	0.376712	0.998969	-1.00418	0.834533	0.98032	-0.57298	0.0833808	0.698693	0.0362664	-0.45619	0.185114
B6RJ5Xp4eS3RTXnJfs	ILMN_2671436	CCDC77	1.00376	0.858428	0.998485	NA	NA	NA	NA	NA	NA	1.01355	0.449365	0.880971	0.0273651	0.940184	NA	NA	NA	NA
6eqOZ5UgjizkozrxTI	ILMN_1234824	CCDC80	-1.03578	0.134271	0.998485	-1.01705	0.586519	0.939093	-1.00899	0.680405	0.998969	1.00053	0.980888	0.998221	0.136761	0.706368	0.0617616	0.865411	-0.330306	0.38532
fSif3iI0ZSIaKZDLrI	ILMN_2609772	CCDC82	NA	NA	NA	NA	NA	NA	NA	NA	NA	-1.00404	0.820055	0.977542	NA	NA	NA	NA	NA	NA
HNQiiiRJ3pJdUMoV1w	ILMN_1213911	CCDC84	-1.07952	0.0642868	0.998485	1.03529	0.124317	0.865421	-1.0169	0.561732	0.998969	1.05022	0.0383981	0.490215	-0.0342192	0.925233	-0.16783	0.64304	0.295689	0.406828
idScn0uhMURfdJJeBc	ILMN_2723052	CCDC85A	1.02231	0.580933	0.998485	1.00409	0.866665	0.981351	1.04636	0.0923271	0.998969	1.01835	0.369777	0.843357	0.22605	0.530018	0.269744	0.451028	0.451574	0.190167
Z5ej51eJ2qDnuhdSF4	ILMN_1220846	CCDC85B	-1.05008	0.49044	0.998485	-1.04214	0.353658	0.899208	1.09875	0.12124	0.998969	1.0367	0.172447	0.705012	0.289035	0.417961	-0.487742	0.152704	-0.153135	0.672762
TVTdf1Ze9QLl8y0wHs	ILMN_2730003	CCDC86	1.0214	0.605455	0.998485	1.04705	0.0434992	0.865421	-1.03789	0.142578	0.998969	-1.0057	0.80933	0.975109	0.365597	0.298852	0.376883	0.283028	0.0465095	0.89848
N9ZQ05H9EqJJJSm8uk	ILMN_2735241	CCDC87	NA	NA	NA	NA	NA	NA	NA	NA	NA	-1.03036	0.141789	0.675683	NA	NA	NA	NA	NA	NA
0VHd7DLRySvu.MkFPo	ILMN_1258136	CCDC88A	-1.05229	0.379392	0.998485	1.02374	0.695777	0.957376	-1.05102	0.167001	0.998969	-1.08018	0.00427666	0.262212	-0.133071	0.714007	0.524266	0.119799	-0.180721	0.617334
TUUl7t4eq4ojoHg91Y	ILMN_3008230	CCDC9	-1.02062	0.472221	0.998485	1.00842	0.778049	0.972372	1.00461	0.82372	0.998969	-1.01491	0.515541	0.900776	0.717692	0.0194375	-0.319361	0.368395	0.174566	0.629561
BgCe0dAXp_MyC1813g	ILMN_2752408	CCDC90B	-1.00374	0.914532	0.998485	-1.03819	0.455219	0.913041	1.01003	0.70899	0.998969	-1.00971	0.698857	0.952107	-0.109305	0.77953	0.235065	0.513278	0.172883	0.63292
xVAtOoDe7vNSLn0rCU	ILMN_1217225	CCDC91	1.05788	0.234881	0.998485	-1.04875	0.27889	0.891024	1.0157	0.607548	0.998969	-1.01484	0.540216	0.905487	-0.385086	0.271819	0.113088	0.75576	-0.708234	0.0218971
Np143yQjhdBXjvlUF4	ILMN_2598374	CCDC92	1.05234	0.252799	0.998485	-1.12062	0.065112	0.865421	-1.0133	0.648603	0.998969	1.00905	0.75551	0.962071	-0.26149	0.465525	-0.112092	0.757857	0.0412571	0.909904
3hJihJhJ4u0uOVFut0	ILMN_2600426	CCDC94	1.0038	0.864279	0.998485	-1.01309	0.519972	0.926016	1.00215	0.922331	0.998969	-1.02596	0.221726	0.746484	0.168791	0.64111	0.828641	0.00305065	-0.424785	0.22108
HRUuqyCu93wHvgI10E	ILMN_2605423	CCDC97	1.01154	0.605127	0.998485	-1.01429	0.620085	0.947048	1.00653	0.776093	0.998969	1.0069	0.722378	0.957615	0.202759	0.600833	0.238449	0.507053	0.332298	0.348185
0oN7gKdXhbXn4wXkKU	ILMN_2929518	CCHCR1	-1.01701	0.526734	0.998485	1.00364	0.862757	0.981196	NA	NA	NA	1.00914	0.570033	0.914533	0.222349	0.536953	0.124303	0.73225	NA	NA
iKHGDFTbLqUm36V5_g	ILMN_1252990	CCK	-1.13913	0.209358	0.998485	1.15251	0.496756	0.919326	1.03196	0.538027	0.998969	-1.03327	0.551106	0.910252	0.462897	0.177912	-0.131995	0.716239	0.524433	0.11966
NdX4_03qFwVx1rjssk	ILMN_2691478	CCKBR	-1.03393	0.525027	0.998485	1.0954	0.636735	0.949555	-1.02228	0.661794	0.998969	-1.00191	0.951969	0.99602	-0.288273	0.419245	-0.135238	0.709518	0.216411	0.548155
f_jCG3QF9NfgX07cp4	ILMN_2771766	CCL12	-1.00715	0.831638	0.998485	NA	NA	NA	NA	NA	NA	NA	NA	NA	0.41513	0.232881	NA	NA	NA	NA
iNE3kaU1f3xemieX1c	ILMN_1213286	CCL21A	-1.04899	0.580642	0.998485	1.09535	0.429967	0.912674	1.04669	0.738496	0.998969	1.14932	0.157704	0.688434	0.712515	0.0207587	-0.279512	0.434139	0.194255	0.590742
Z1tRFflefQU8TeRpTU	ILMN_2602139	CCL21B	1.01561	0.813433	0.998485	1.05127	0.551124	0.931317	-1.00631	0.953704	0.998969	-1.02636	0.777449	0.967583	0.574478	0.0823915	-0.174783	0.62913	0.183454	0.611929
9LJWXolSiNVRgfQnq4	ILMN_2969845	CCL21C	-1.05996	0.413285	0.998485	1.00239	0.978393	0.997382	1.02685	0.810733	0.998969	-1.02818	0.765141	0.964676	0.710852	0.021196	-0.506888	0.134844	0.231759	0.519391
ZzgtQrogVQSxCbii5Q	ILMN_2661722	CCL25	-1.00909	0.763262	0.998485	-1.00169	0.945841	0.994451	1.03236	0.0846968	0.998969	-1.01639	0.444326	0.87769	0.326357	0.357396	0.0108339	0.976304	-0.451575	0.190167
KGoiIoGIoy4u7iLlxE	ILMN_2942353	CCL25	-1.07307	0.140689	0.998485	1.05199	0.127462	0.865421	-1.00967	0.801701	0.998969	-1.05917	0.0827247	0.5933	0.573361	0.0831288	0.287669	0.420265	-0.0890117	0.806822
3ROgeSiljqh7RdSnts	ILMN_1216183	CCL27A	-1.14178	0.117244	0.998485	1.0412	0.687385	0.957087	1.07158	0.0897441	0.998969	-1.00666	0.848395	0.984525	0.428653	0.21645	-0.361678	0.304453	0.0953595	0.793288
oena68gZQqAKdQqHsU	ILMN_3146018	CCL27A	-1.08107	0.166459	0.998485	1.04516	0.684801	0.957087	1.02492	0.608799	0.998969	-1.00464	0.911666	0.991054	0.232894	0.51729	-0.288102	0.419534	0.458437	0.182682
HnElNcHl0g0dC99R2s	ILMN_2776603	CCL9	-1.00217	0.945689	0.998485	1.00643	0.788699	0.973584	1.01992	0.25077	0.998969	-1.014	0.496475	0.897981	0.160691	0.657424	0.353736	0.315974	0.433298	0.210965
Ec1OL.k0l5pJ3OqElk	ILMN_2719834	CCM2	1.05617	0.0801784	0.998485	1.01697	0.635614	0.949555	-1.01208	0.651484	0.998969	-1.01584	0.611872	0.929414	-0.521016	0.12253	0.0735117	0.840059	-0.453351	0.188212
cuzncl0lPHj0yUv0Xw	ILMN_2725232	CCNC	1.05017	0.295039	0.998485	1.03641	0.373094	0.899257	1.01993	0.306781	0.998969	1.00039	0.98798	0.998221	-0.357573	0.31038	0.728995	0.0167573	0.11174	0.77472
WlMh666tRoN5XuE4Ck	ILMN_2601471	CCND1	1.02178	0.634218	0.998485	1.05644	0.326573	0.895167	1.05907	0.169566	0.998969	-1.02697	0.386161	0.851796	-0.0613334	0.866337	-0.376863	0.283057	0.103811	0.775345
0pTIeuurUaDeV7hOAo	ILMN_1221503	CCND1	-1.01421	0.651931	0.998485	-1.03231	0.654472	0.953578	1.05781	0.185305	0.998969	-1.033	0.459518	0.884868	0.415609	0.232287	0.28642	0.422376	0.00350047	0.992343
EBkRd5Xnogr8qU7eIg	ILMN_2669793	CCND1	-1.19819	0.0036677	0.896559	-1.01208	0.754541	0.96795	1.04907	0.267505	0.998969	-1.00239	0.924385	0.991652	-0.0901123	0.804472	0.303987	0.393146	0.0136618	0.97012
NoRK4GnXC3Tv64P6n0	ILMN_2700166	CCND2	1.12985	0.119344	0.998485	1.06725	0.448441	0.913041	1.0186	0.710379	0.998969	1.06617	0.0150711	0.384563	0.150953	0.677213	0.392455	0.261959	-0.00969317	0.978798
QRV1F0300iSryvqOjY	ILMN_3131063	CCND3	1.03708	0.0966947	0.998485	-1.08127	0.146622	0.866429	1.00634	0.85022	0.998969	1.07758	0.0278992	0.450011	-0.426536	0.25226	-0.373964	0.287078	0.100884	0.781548
NlvhT5OBIPCmdHSbkk	ILMN_1240178	CCNDBP1	1.00701	0.84109	0.998485	-1.04469	0.3307	0.896048	1.01928	0.505391	0.998969	-1.00391	0.917662	0.991652	0.364243	0.300781	-0.21216	0.556232	0.0718607	0.843614
0_itKJV5I57nc6Irk0	ILMN_2716497	CCNE1	1.03637	0.219265	0.998485	1.0309	0.200673	0.875854	1.00271	0.918747	0.998969	-1.00793	0.772738	0.966424	-0.058429	0.872622	-0.097481	0.788775	0.168525	0.641644
lJ0qV6El4tBciyegU8	ILMN_2500276	CCNG1	1.01337	0.795304	0.998485	-1.04195	0.296347	0.891024	1.06101	0.0386555	0.998969	-1.04403	0.360344	0.839696	-0.315504	0.37453	-0.0891259	0.806578	-0.496997	0.173465
El97npnNzX5vojUJHg	ILMN_2710229	CCNG1	1.0374	0.339865	0.998485	-1.01088	0.72393	0.962819	-1.01104	0.677467	0.998969	-1.00522	0.841231	0.982732	-0.461091	0.179834	-0.0190257	0.958396	-0.214775	0.551259
iXBrSC_A6Pu3oZHkaQ	ILMN_2702233	CCNG1	1.01821	0.580572	0.998485	-1.01148	0.671309	0.95602	-1.00727	0.7563	0.998969	1.01949	0.404426	0.859027	-0.511902	0.13039	0.358472	0.309077	-0.402455	0.2489
lUu.su8vwJD3u646JQ	ILMN_2700233	CCNG2	1.06374	0.26888	0.998485	1.07177	0.250723	0.883779	1.02267	0.757735	0.998969	-1.00744	0.879876	0.985741	-0.625407	0.0531406	0.255037	0.477	-0.260214	0.467783
rQMhGtMIoALdrdjdIk	ILMN_1228850	CCNL1	-1.04158	0.235202	0.998485	1.04293	0.370258	0.899257	1.00724	0.835177	0.998969	-1.01093	0.633566	0.935148	-0.37417	0.28679	0.241887	0.50076	0.231345	0.520159
ThLV65BEoDnoOX.mz4	ILMN_2736471	CCNO	1.01637	0.525332	0.998485	1.12573	0.0208593	0.865421	1.01716	0.448968	0.998969	1.00994	0.621065	0.932256	-0.245469	0.494239	-0.23868	0.506629	-0.624048	0.0538144
ECEe4M51HV58uVKq9I	ILMN_2758087	CCNT1	-1.02934	0.677264	0.998485	-1.02933	0.226977	0.883779	1.02187	0.382061	0.998969	1.0651	0.127984	0.657403	0.351736	0.318911	-0.237255	0.509245	0.408117	0.275515
6nqen7fuB3fkReDnOg	ILMN_1227277	CCPG1	-1.03929	0.319354	0.998485	-1.08732	0.0203458	0.865421	-1.05427	0.139311	0.998969	-1.02009	0.514732	0.900776	-0.0224753	0.95086	0.273675	0.444196	-0.248686	0.488413
oUd750nptCdGNdefE0	ILMN_2888191	CCR5	-1.01079	0.60715	0.998485	NA	NA	NA	1.00503	0.757592	0.998969	1.0324	0.129453	0.659837	-0.067968	0.852005	NA	NA	0.564081	0.113644
EHfXfyb_1ku6m6mu5M	ILMN_2752624	CCRL2	1.03626	0.065909	0.998485	NA	NA	NA	-1.02375	0.216924	0.998969	-1.00613	0.768743	0.964968	-0.00284403	0.994206	NA	NA	-0.247863	0.4899
ruOG_shu4I8dQ0fdeo	ILMN_1255422	CCRN4L	1.05018	0.193926	0.998485	1.08225	0.155025	0.868191	-1.0021	0.943419	0.998969	-1.01226	0.711972	0.955244	-0.0339329	0.925857	0.434847	0.209153	0.442244	0.200628
6Xovd.Q__CXfUBAM18	ILMN_2591440	CCRN4L	-1.02224	0.751796	0.998485	1.05869	0.461967	0.913949	1.00672	0.948641	0.998969	1.01399	0.72428	0.957615	-0.428711	0.216381	0.0950249	0.794	0.128151	0.724228
3VUnRdwEiXTtK8.rXY	ILMN_1253618	CCS	-1.0796	0.223826	0.998485	-1.03307	0.510553	0.921277	1.05941	0.0294671	0.998969	1.05073	0.154378	0.685954	0.461221	0.179696	-0.341357	0.334378	0.651125	0.0414262
QggvONqgjAdPR.3qvk	ILMN_1218488	CCT2	-1.00208	0.926371	0.998485	NA	NA	NA	NA	NA	NA	NA	NA	NA	0.491747	0.148855	NA	NA	NA	NA
okjooosTU0nu4oTTUk	ILMN_1247317	CCT3	1.09414	0.0419699	0.998485	-1.03548	0.593712	0.939387	1.06804	0.216954	0.998969	1.06077	0.0573792	0.542029	0.0181293	0.963077	-0.251404	0.483514	-0.330458	0.351025
usiHkvefeaPjhPt3pQ	ILMN_2931411	CCT3	1.03261	0.449087	0.998485	-1.04493	0.34984	0.898965	-1.03027	0.227901	0.998969	-1.07807	0.00354462	0.251799	0.276883	0.438656	0.253605	0.479564	-0.0620452	0.864797
use6eg4KEFF_9ft6Cc	ILMN_2663186	CCT4	-1.0052	0.911146	0.998485	-1.07399	0.134348	0.865421	-1.01033	0.7091	0.998969	1.01918	0.606961	0.928639	-0.59763	0.0680561	0.307313	0.387724	-0.800229	0.00959172
NbCXog3ggwHsU.FHuE	ILMN_2707308	CCT5	-1.00842	0.814242	0.998485	NA	NA	NA	1.00147	0.974051	0.998969	NA	NA	NA	-0.638187	0.0470763	NA	NA	-0.130053	0.720272
uJ5xHXse42UUE9162E	ILMN_2962840	CCT6A	1.05165	0.317245	0.998485	1.01644	0.516209	0.924468	-1.00556	0.868783	0.998969	-1.01918	0.409771	0.86304	-0.275237	0.441494	-0.141885	0.6958	-0.655234	0.0397321
cn67v.TAT.Xl8g_i04	ILMN_1233793	CCT7	-1.00248	0.938466	0.998485	-1.00156	0.949644	0.994451	-1.00564	0.841635	0.998969	-1.00937	0.611013	0.929414	-0.267432	0.455067	-0.300645	0.398629	0.102349	0.778441
6epzwHpRw55LR7HCLo	ILMN_1259677	CCT8	-1.03288	0.479081	0.998485	-1.02822	0.3918	0.901856	1.01	0.861883	0.998969	-1.04231	0.358656	0.8391	-0.108396	0.76565	-0.0609824	0.867096	-0.219003	0.543255
cUZL0EE3336Ph1Hp0k	ILMN_2767674	CCZ1	-1.02229	0.600639	0.998485	-1.00318	0.922536	0.991833	1.00956	0.683338	0.998969	1.02349	0.488933	0.895877	-0.0395073	0.913713	0.173176	0.632334	0.217726	0.573603
Hh3g1R2iC.B3pstFlo	ILMN_2742075	CD14	NA	NA	NA	NA	NA	NA	NA	NA	NA	1.00527	0.767596	0.964968	NA	NA	NA	NA	NA	NA
ijeSwt6ogXixFHEb6s	ILMN_2492403	CD151	-1.00104	0.986495	0.998485	-1.08584	0.0882088	0.865421	1.02164	0.443922	0.998969	1.10038	0.0170196	0.392136	0.475297	0.165043	-0.109315	0.76371	0.699953	0.0242199
i43ksLeqIF4sRRxG_o	ILMN_1235688	CD151	-1.02573	0.698851	0.998485	-1.05736	0.309066	0.892493	-1.02092	0.6006	0.998969	1.03516	0.206647	0.733731	0.503982	0.137468	-0.387777	0.268196	0.144414	0.6906
HioB1BVEfjne13URKU	ILMN_2836710	CD151	-1.03295	0.641289	0.998485	-1.05323	0.42533	0.909383	1.01407	0.653007	0.998969	1.0659	0.0431603	0.5012	0.401371	0.250298	-0.475514	0.164822	0.295354	0.440351
NX_Ux_eRCSEeeh8gv0	ILMN_1246611	CD164	1.0073	0.899228	0.998485	-1.07825	0.283367	0.891024	-1.00837	0.820338	0.998969	-1.04143	0.286308	0.794021	-0.480744	0.15957	0.0778785	0.83067	0.155315	0.668326
oUndIWHKnVNooEDbLQ	ILMN_3160771	CD200	1.08797	0.0397194	0.998485	-1.00905	0.765241	0.969559	1.02557	0.493171	0.998969	-1.00761	0.770553	0.965462	0.0926279	0.799106	-0.147764	0.683732	-0.718729	0.0191801
usvRN.EAk5.VzVPqVE	ILMN_3160770	CD200	1.07173	0.243806	0.998485	-1.03191	0.386582	0.899627	1.00237	0.968784	0.998969	1.05299	0.0744578	0.585687	0.157475	0.663939	0.649251	0.0422151	-0.239101	0.505856
05.oROniFEUKHzqp5U	ILMN_2896843	CD248	1.02252	0.474227	0.998485	-1.03148	0.265107	0.887169	-1.01583	0.574176	0.998969	1.00747	0.76787	0.964968	-0.303584	0.393804	-0.0922698	0.79987	0.363318	0.302102
xVWugVXe8XvREJ8_OI	ILMN_1226800	CD274	-1.04161	0.116425	0.998485	-1.06245	0.050836	0.865421	-1.01009	0.674088	0.998969	1.00845	0.628117	0.934193	-0.0617183	0.865504	-0.49694	0.143954	0.351131	0.319803
[truncated: 10,522 more rows]
