# Supplementary material for: Gene Expression in Brain and Liver Produced by Three Different Regimens of Alcohol Consumption in Mice: Comparison with Immune Activation
Source: PLoS One. 2013 Mar 29;8(3):e59870. doi: 10.1371/journal.pone.0059870 (PMC3612084; doi:10.1371/journal.pone.0059870)
Supplement: Table S3 — Most significant network functions, biological functions and canonical pathways detected by Ingenuity pathway analysis. (XLSX) [file pone.0059870.s004.xlsx]

## Sheet: Sheet1
Table S3. Most significant network functions, biological functions and canonical pathways detected by Ingenuity pathway analysis. Numbers in parentheses are p values (biological functions and canonical pathways) or negative log10 of the p values (network functions) computed with Fisher's exact test.
PFC
	Chronic	CI	DID	LPS
Top Network Functions	Cell signaling, molecular transport, nucleic acid metabolism (34)	Genetic disorder, neurological disease, skeletal and muscular disorders (41)	Amino acid metabolism, cell signaling, molecular transport (35)	Molecular transport, connective tissue development & function, skeletal & muscular system development & function (35)
Top Biological Functions
Diseases and Disorders	Psychological disorders (social anxiety disorder) 1.0E-04	Genetic disorder (Huntington's disease) (1.8E-20)	Cancer (bronchiolo-alveolar adenocarcinoma) (1.4E-04)	Organismal injury and abnormalities (injury of lung) (1.1E-04)
Molecular and Cellular Functions	Cellular assembly and organization (dissociation of vesicles) (2.7E-05)	Drug metabolism (activation of dopamine) 8.9E-05	Amino acid metabolism (quantity of L-triiodothyronine) (1.3E-05)	Cell death (1.3E-06)
Physiological System Development and Function	Behavior (circadian rhythm) (3.3E-05)	Behavior (psychological process of mice) 4.6E-11	Behavior (8.7E-04)	Behavior (5.0E-08)
Top Canonical Pathways	cAMP-mediated signaling (2.1E-06)	Relaxin signaling (6.5E-06)	Cellular effects of sildenfafil (4.6E-03)	Circadian rhythm signaling (1.4E-03)
Liver
	Chronic	CI	DID	LPS
Top Network Functions	Lipid metabolism, small molecule biochem, vitamin and mineral metabolism (49)	Drug metabolism, glutathione depletion in liver, behavior [51]	Cell death, renal necrosis/cell death, behaviour [46]	Lipid metabolism, small molecule biochem, molecular transport (55)
Top Biological Functions
Diseases and Disorders	Gastrointestinal disease (hepatic steatosis) [2.3E-06]	Genetic disorder (sitosterolemia of humans) [2.0E-04]	Genetic disorder (sitosterolemia of humans) [7.4E-05]	Cancer (epidermal hyperplasia) [7.2E-05]
Molecular and Cellular Functions	Lipid metabolism (metabolic process of lipid) [2.3E-13]	Lipid metabolism (synthesis of cholesterol) [6.9E-13]	Lipid metabolism (metabolic process of terpenoid) [3.5E-07]	Lipid metabolism (biosynthesis of lipid) [1.7E-05]
Physiological System Development and Function	Endocrine system development and function (metabolism of progesterone) [6.3E-05]	Behavior (circdian rhythm of mice) [1.4E-04]	Digestive system development and function (biliary excretion of cholesterol) [4.4E-04]	Connective tissue development and function (mass of connective tissue) [1.8E-04]
Top Canonical Pathways	Butanoate metabolism [1.2E-05]	Biosynthesis of steroids [2.9E-08]	LPS/IL-1 mediated inhibition of RXR function [4.1E-05]	Glycine, serine and threonine metabolism [5.0E-04]
