# Supplementary material for: Gene Expression in Brain and Liver Produced by Three Different Regimens of Alcohol Consumption in Mice: Comparison with Immune Activation
Source: PLoS One. 2013 Mar 29;8(3):e59870. doi: 10.1371/journal.pone.0059870 (PMC3612084; doi:10.1371/journal.pone.0059870)
Supplement: Table S4 — Top genes differentially expressed in the present study and at least one other ethanol- or LPS-related study. (XLSX) [file pone.0059870.s005.xlsx]

## Sheet: Table S4
Table S4:	Top genes differentially expressed in the present study and at least one other ethanol- or LPS-related study. An initial list of prominent genes was composed from the top 10% of differentially expressed genes (as determined by p value) from each treatment in the present study plus genes present in the PFC CI dopamine network. This list was analyzed for overlap with significant genes from 8 other …
Study Legend:
Column heading in table	Publication				Type of study	Data variable presented in table
mouse 1	Mulligan MK, Ponomarev I, Hitzemann RJ, Belknap JK, Tabakoff B, Harris RA, Crabbe JC, Blednov YA, Grahame NJ, Phillips TJ, Finn DA, Hoffman PL, Iyer VR, Koob GF, Bergeson SE. Proc Natl Acad Sci U S A. 2006 Apr 18;103(16):6368-73				microarray	P values from a meta-analysis comparing alcohol preferring and non-preferring mice across different studies
mouse 2	Wolstenholme JT, Warner JA, Capparuccini MI, Archer KJ, Shelton KL, Miles MF. PLoS One. 2011;6(6):e21100				microarray	P values for correlation of ethanol consumption (average intake from the last 8 days of ethanol access following a third round of deprivation) and prefrontal cortex gene expression in C57BL/6NCrl mice
mouse 3	Contet C, Gardon O, Filliol D, Becker JA, Koob GF, Kieffer BL. Addict Biol. 2011 Oct;16(4):615-9				qRT-PCR	Fold changes of genes differentially expressed in mouse extended amygdala using 3 ethanol paradigms. [a=nondependent; b=dependent; c=intoxicated) (+FC = upregulated in treated mice compared to controls)
mouse 4	Melendez RI, McGinty JF, Kalivas PW, Becker HC. Addict Biol. 2012 Mar;17(2):351-64				microarray	Fold changes of genes differentially expressed in mouse prefrontal cortex after chronic intermittent ethanol exposure. (+FC = upregulated in treated mice compared to controls)
mouse 5	Zamanian JL, Xu L, Foo LC, Nouri N, Zhou L, Giffard RG, Barres BA. J Neurosci. 2012 May 2;32(18):6391-410.				microarray	Fold changes of genes induced four-fold or greater in LPS-treated astrocytes.
rat 1	Bell RL, Kimpel MW, McClintick JN, Strother WN, Carr LG, Liang T, Rodd ZA, Mayfield RD, Edenberg HJ, McBride WJ. Pharmacol Biochem Behav. 2009 Nov;94(1):131-47				microarray	Fold changes of genes differentially expressed in nucleus accumbens of alcohol-preferring "P" rats following continuous access chronic ethanol administration (+FC = upregulated in ethnaol-consuming P rats compared to water-consuming controls
human 1	Liu J, Lewohl JM, Harris RA, Iyer VR, Dodd PR, Randall PK, Mayfield RD. Neuropsychopharmacology. 2006 Jul;31(7):1574-82				microarray	Fold changes of genes differentially expressed in post-mortem superior frontal cortex of human alcholics (+FC = upregulated in alcholics compared to controls)
human 2	Ponomarev I, Wang S, Zhang L, Harris RA, Mayfield RD. J Neurosci. 2012 Feb 1;32(5):1884-97				microarray	Fold changes of genes differentially expressed in post-mortem superior frontal cortex of human alcholics (+FC = upregulated in alcholics compared to controls)
		Study
Gene Symbol	Gene Name	Chronic	CI	DID	LPS	Mouse 1	Mouse 2	Mouse 3a	Mouse 3b	Mouse 3c	Mouse 4	Mouse 5	Rat 1	Human 1	Human 2
AAK1	AP2 associated kinase 1				-1.122	0.0015								1.22
ACTN2	actinin, alpha 2		1.245		1.074									-1.132
AHNAK	AHNAK nucleoprotein	-1.183			1.125	0.0026
ANP32A	acidic (leucine-rich) nuclear phosphoprotein 32 family, member A	-1.3	1.14			0.00096									-1.102
AP1S1	adaptor-related protein complex 1, sigma 1 subunit	1.199	1.205	1.1		0.00039
ARNTL	aryl hydrocarbon receptor nuclear translocator-like				-1.108										-1.126
ARPC3	actin related protein 2/3 complex, subunit 3, 21kDa	-1.272				0.00047
ATMIN	ATM interactor		-1.118		-1.077										-1.178
AVPI1	arginine vasopressin-induced 1		1.081			3.4e-07
B2M	beta-2-microglobulin				1.196	1.1e-09					1.884	4.6
BCAP31	B-cell receptor-associated protein 31			1.1		2.5e-05								-1.156	1.239
BCL2	B-cell CLL/lymphoma 2	-1.068				0.0043
C1QTNF4	C1q and tumor necrosis factor related protein 4				1.115	1.5e-07
C3orf39	chromosome 3 open reading frame 39	1.123				0.012									1.195
CCND1	cyclin D1	-1.198				1.5e-06
CD99L2	CD99 molecule-like 2		-1.102			0.00074
CDK10	cyclin-dependent kinase 10			1.07											-1.251
CDKN1C	cyclin-dependent kinase inhibitor 1C (p57, Kip2)		-1.257											1.456
CDO1	cysteine dioxygenase, type I		1.149												-1.22
CDS1	CDP-diacylglycerol synthase (phosphatidate cytidylyltransferase) 1				-1.106	0.00083
CLDN5	claudin 5				-1.133								-1.16		1.484
CLK4	CDC-like kinase 4			-1.136			6.5e-05							1.214	-1.198
COG6	component of oligomeric golgi complex 6	1.149	1.085												-1.099
COL6A1	collagen, type VI, alpha 1		1.358	-1.19	1.178										1.245
COPA	coatomer protein complex, subunit alpha		-1.095			1e-05
CTGF	connective tissue growth factor		1.365			0							1.24
CX3CL1	chemokine (C-X3-C motif) ligand 1	1.097			-1.114	0
DAZAP1	DAZ associated protein 1	-1.115				0
DCTPP1	dCTP pyrophosphatase 1			1.06										-1.302
DCUN1D4	DCN1, defective in cullin neddylation 1, domain containing 4 (S. cerevisiae)		1.098												-1.265
DNAJC7	DnaJ (Hsp40) homolog, subfamily C, member 7		-1.135												-1.138
DRD1	dopamine receptor D1	1.27	1.645						1.723
DRD2	dopamine receptor D2		1.243			0.013
EFNB1	ephrin-B1			-1.075		0.00011
EGR2	early growth response 2		1.28		1.283	0.0017
EMB	embigin		-1.27		-1.06									-1.716
EPC1	enhancer of polycomb homolog 1 (Drosophila)		1.094		1.08									-1.281
EPN2	epsin 2	1.059	1.069		-1.083	1e-11							-1.09		1.178
EVI5	ecotropic viral integration site 5				-1.105									1.167
FADD	Fas (TNFRSF6)-associated via death domain	-1.072				0.0053
FAIM2	Fas apoptotic inhibitory molecule 2		-1.174		-1.1									1.811	1.292
FAM131A	family with sequence similarity 131, member A				-1.13	0.00071
FAM96B	family with sequence similarity 96, member B			1.05											1.11
FCGRT	Fc fragment of IgG, receptor, transporter, alpha				1.169	0.00049
FKBP9	FK506 binding protein 9, 63 kDa			1.11										1.185
FMN2	formin 2				-1.093	4.2e-07
FOS	FBJ murine osteosarcoma viral oncogene homolog		1.455										1.72
GADD45G	growth arrest and DNA-damage-inducible, gamma		1.252	-1.163	1.208	0.013
GET4	golgi to ER traffic protein 4 homolog (S. cerevisiae)	1.081	-1.082		-1.081	0.013
GIT1	G protein-coupled receptor kinase interacting ArfGAP 1				-1.098	0.0004									1.275
GNPTG	N-acetylglucosamine-1-phosphate transferase, gamma subunit		1.136												1.207
GRN	granulin				1.128	1.7e-06									1.162
HBA1/HBA2	hemoglobin, alpha 1				1.44	1.5e-12
HMGN3	high mobility group nucleosomal binding domain 3	-1.142	1.113		1.063		1.01e-05
HSD17B11	hydroxysteroid (17-beta) dehydrogenase 11	-1.169				0.00069									-1.218
HSD17B7	hydroxysteroid (17-beta) dehydrogenase 7		-1.118		-1.062	0.0084
HSD3B1	hydroxy-delta-5-steroid dehydrogenase, 3 beta- and steroid delta-isomerase 1	-1.375												-1.562
HSPH1	heat shock 105kDa/110kDa protein 1				-1.165	0.011
HTRA1	HtrA serine peptidase 1	1.138		-1.111		1.5e-08
IARS2	isoleucyl-tRNA synthetase 2, mitochondrial				-1.075	0.0037
IFITM2	interferon induced transmembrane protein 2				1.132										1.58
IFITM3	interferon induced transmembrane protein 3				1.181	0.012						7.2			1.59
IPO4	importin 4	1.128	-1.081		-1.071	0.012
ITPR1	inositol 1,4,5-trisphosphate receptor, type 1				-1.083	0
JMJD6	jumonji domain containing 6				1.156		1.23e-05							-1.607
KCNA5	potassium voltage-gated channel, shaker-related subfamily, member 5	1.065	1.2			0.0014									1.177
KCNAB1	potassium voltage-gated channel, shaker-related subfamily, beta member 1		1.249				2.23e-05
KCNC4	potassium voltage-gated channel, Shaw-related subfamily, member 4				-1.08	0.0023								1.204
KEAP1	kelch-like ECH-associated protein 1		1.069	1.08	-1.108	0.011
KLF2	Kruppel-like factor 2 (lung)		1.11		1.178	1.3e-05
MANBA	mannosidase, beta A, lysosomal		-1.124			0.013					1.575
MCL1	myeloid cell leukemia sequence 1 (BCL2-related)		1.077										1.14
MGP	matrix Gla protein				1.38	0.0041
MRPL2	mitochondrial ribosomal protein L2				-1.095	2.6e-08
MRPL22	mitochondrial ribosomal protein L22				1.085										-1.11
MRPS17	mitochondrial ribosomal protein S17				1.156	0.011
NACC1	nucleus accumbens associated 1, BEN and BTB (POZ) domain containing			1.06		0.00083
NBL1	neuroblastoma, suppression of tumorigenicity 1		-1.13											-1.259	1.294
NCAPH2	non-SMC condensin II complex, subunit H2	1.058		1.09	-1.064	0.0015									1.129
NIPSNAP1	nipsnap homolog 1 (C. elegans)		1.088												1.232
NRXN2	neurexin 2	-1.367													1.233
NUTF2	nuclear transport factor 2	1.082	-1.068	1.07			3.36e-06
PALMD	palmdelphin				1.137	0.0093
PARP1	poly (ADP-ribose) polymerase 1				1.126										-1.203
PCYT1B	phosphate cytidylyltransferase 1, choline, beta			-1.087		0.0032
PDE10A	phosphodiesterase 10A		1.332			0.0065	5e-07
PDE1B	phosphodiesterase 1B, calmodulin-dependent	1.272	1.455												1.249
PDYN	prodynorphin	1.449	1.689						1.25
PER1	period homolog 1 (Drosophila)		1.133		1.223									1.845
PER2	period homolog 2 (Drosophila)		1.157		1.223								-1.17
PHF20L1	PHD finger protein 20-like 1	-1.096					8.38e-05
PON2	paraoxonase 2			1.1		0.0066
POU6F1	POU class 6 homeobox 1				-1.139	1.1e-07
PPM1M	protein phosphatase, Mg2+/Mn2+ dependent, 1M		-1.114			0.0015									1.182
PPP1R1B	protein phosphatase 1, regulatory (inhibitor) subunit 1B	1.175	1.171		1.22										1.59
PRPF3	PRP3 pre-mRNA processing factor 3 homolog (S. cerevisiae)				1.101	0.00085
PRPF38B	PRP38 pre-mRNA processing factor 38 (yeast) domain containing B		1.067											1.208
PSMB2	proteasome (prosome, macropain) subunit, beta type, 2			1.08										1.159
PTGDS	prostaglandin D2 synthase 21kDa (brain)				1.375					1.657
PTTG1IP	pituitary tumor-transforming 1 interacting protein				1.108	0.002								1.366
RAC3	ras-related C3 botulinum toxin substrate 3 (rho family, small GTP binding protein Rac3)		-1.14												1.139
RALY	RNA binding protein, autoantigenic (hnRNP-associated with lethal yellow homolog (mouse))	-1.473		1.09											1.279
RARB	retinoic acid receptor, beta	1.129	1.349												-1.138
RFX2	regulatory factor X, 2 (influences HLA class II expression)		-1.076			0.0022
RHBDL2	rhomboid, veinlet-like 2 (Drosophila)	-1.208				0.0069
RNF141	ring finger protein 141			1.05	1.063									1.31
RNF41	ring finger protein 41	1.164				2.7e-15
S100A11	S100 calcium binding protein A11				1.174	0.011
SBK1	SH3-binding domain kinase 1		1.097			0.0042
SERPINF1	serpin peptidase inhibitor, clade F (alpha-2 antiplasmin, pigment epithelium derived factor), member 1				1.226			-1.154	-1.136
SERPING1	serpin peptidase inhibitor, clade G (C1 inhibitor), member 1				1.193							34			1.213
SGIP1	SH3-domain GRB2-like (endophilin) interacting protein 1		1.116	1.06		0.0027								1.657
SGMS1	sphingomyelin synthase 1	1.105		-1.099										1.328
SHF	Src homology 2 domain containing F	-1.064			-1.067										1.069
SLC38A2	solute carrier family 38, member 2				1.16										-1.181
SMARCA4	SWI/SNF related, matrix associated, actin dependent regulator of chromatin, subfamily a, member 4				-1.081									-1.344
SPARC	secreted protein, acidic, cysteine-rich (osteonectin)			-1.124		3.5e-05
SPSB3	splA/ryanodine receptor domain and SOCS box containing 3				-1.083	1.3e-14
SQSTM1	sequestosome 1	1.122				0.0016
SRSF5	serine/arginine-rich splicing factor 5		1.122											1.828
SRXN1	sulfiredoxin 1	1.149			-1.063		7.27e-06				6.354
STX6	syntaxin 6	1.116				1.8e-06									-1.159
SWT1	SWT1 RNA endoribonuclease homolog (S. cerevisiae)			-1.124	1.081	0.00092
TARSL2	threonyl-tRNA synthetase-like 2		1.1												-1.088
TBC1D17	TBC1 domain family, member 17	1.143													1.174
TCF25	transcription factor 25 (basic helix-loop-helix)	1.171				0.0055								-1.238
TGFBR3	transforming growth factor, beta receptor III				1.101	0.00026							-1.14
TIAM1	T-cell lymphoma invasion and metastasis 1		1.289												-1.13
TMUB1	transmembrane and ubiquitin-like domain containing 1		-1.076				0.0008								1.292
TSEN15	tRNA splicing endonuclease 15 homolog (S. cerevisiae)		-1.1												-1.201
TYRO3	TYRO3 protein tyrosine kinase				-1.103										1.24
UBAP2L	ubiquitin associated protein 2-like	1.147													1.296
UBL4A	ubiquitin-like 4A	1.096				0.00018									1.168
ULK1	unc-51-like kinase 1 (C. elegans)				-1.101						2.966
VAPB	VAMP (vesicle-associated membrane protein)-associated protein B and C	-1.412	-1.12			0.0028
VWF	von Willebrand factor				1.18	0
ZNRD1	zinc ribbon domain containing 1	-1.137			1.095										-1.062
